# Supplementary material for: A NIR, 1H-NMR, LC-MS and chemometrics pilot study on the origin of carvedilol drug substances: a tool for discovering falsified active pharmaceutical ingredients
Source: Royal Society of Chemistry journal article supplement (doi:10.1039/d1ay02035h), 2022-01-01
Supplement: d1ay02035h1.pdf [file d1ay02035h1.pdf]

**Dataset LC-MS**

|    | Peak 1 | Peak 2 | Peak 3 | Peak 4 | Peak 5 | Peak 6 | Peak 7 | Peak 8 | Peak 9 | Peak 10 | Peak 11 |
|----|--------|--------|--------|--------|--------|--------|--------|--------|--------|---------|---------|
| A1 | 1      | 1      | 1      | 1      | 1      | 0      | 1      | 1      | 0      | 0       | 0       |
| A2 | 0      | 0      | 1      | 1      | 1      | 1      | 0      | 0      | 0      | 1       | 1       |
| A3 | 0      | 1      | 1      | 1      | 1      | 0      | 0      | 0      | 0      | 1       | 1       |
| A4 | 0      | 1      | 1      | 1      | 1      | 0      | 0      | 0      | 0      | 1       | 1       |
| B1 | 1      | 0      | 1      | 0      | 1      | 1      | 1      | 1      | 1      | 0       | 1       |
| A5 | 1      | 1      | 1      | 1      | 1      | 0      | 1      | 0      | 1      | 0       | 0       |
| C1 | 0      | 0      | 1      | 1      | 1      | 1      | 0      | 0      | 0      | 1       | 1       |
| D1 | 0      | 0      | 0      | 0      | 0      | 1      | 0      | 0      | 1      | 0       | 0       |
| A6 | 1      | 1      | 1      | 1      | 1      | 0      | 1      | 1      | 0      | 0       | 0       |
| A7 | 1      | 1      | 1      | 1      | 1      | 0      | 1      | 0      | 1      | 1       | 0       |
| E1 | 1      | 1      | 0      | 0      | 0      | 1      | 1      | 0      | 1      | 0       | 1       |
| A8 | 0      | 0      | 1      | 1      | 1      | 0      | 1      | 0      | 0      | 1       | 1       |
| A9 | 1      | 1      | 1      | 1      | 1      | 0      | 1      | 0      | 1      | 1       | 0       |
| F1 | 1      | 0      | 1      | 0      | 0      | 1      | 1      | 0      | 0      | 0       | 1       |
| G1 | 1      | 0      | 1      | 0      | 0      | 0      | 1      | 0      | 1      | 0       | 0       |
| B2 | 0      | 0      | 1      | 0      | 0      | 1      | 0      | 1      | 1      | 0       | 1       |
