# Supplementary material for: A NIR, 1H-NMR, LC-MS and chemometrics pilot study on the origin of carvedilol drug substances: a tool for discovering falsified active pharmaceutical ingredients
Source: Royal Society of Chemistry journal article supplement (doi:10.1039/d1ay02035h), 2022-01-01
Supplement: d1ay02035h2.pdf [file d1ay02035h2.pdf]

Dataset NIR

|    | 3999       | 4001       | 4003       | 4005       | 4007       | 4009       | 4011       | 4013       | 4015       | 4016       | 4018       | 4020       | 4022       |
|----|------------|------------|------------|------------|------------|------------|------------|------------|------------|------------|------------|------------|------------|
| A1 | 0.41813700 | 0.41764800 | 0.41672100 | 0.41551000 | 0.41448600 | 0.41409600 | 0.41455300 | 0.41597100 | 0.41831300 | 0.42100900 | 0.42300800 | 0.42348100 | 0.42251400 |
| A2 | 0.41609700 | 0.41565200 | 0.41497100 | 0.41403800 | 0.41313900 | 0.41282300 | 0.41358500 | 0.41547600 | 0.41806600 | 0.42058900 | 0.42217900 | 0.42237800 | 0.42145600 |
| A3 | 0.40930300 | 0.40921700 | 0.40881300 | 0.40792400 | 0.40692800 | 0.40655200 | 0.40730700 | 0.40923000 | 0.41186300 | 0.41439600 | 0.41609100 | 0.41658300 | 0.41587100 |
| A4 | 0.42439900 | 0.42400500 | 0.42318400 | 0.42207900 | 0.42114500 | 0.42100500 | 0.42197800 | 0.42397100 | 0.42671000 | 0.42956800 | 0.43153100 | 0.43188800 | 0.43090500 |
| B1 | 0.29531800 | 0.29504600 | 0.29454100 | 0.29379700 | 0.29310600 | 0.29303100 | 0.29385900 | 0.29546400 | 0.29754200 | 0.29960700 | 0.30108500 | 0.30155800 | 0.30099100 |
| A5 | 0.41887800 | 0.41877500 | 0.41829700 | 0.41724000 | 0.41616300 | 0.41600500 | 0.41716000 | 0.41931300 | 0.42195800 | 0.42452300 | 0.42627700 | 0.42665500 | 0.42573700 |
| C1 | 0.42645300 | 0.42608500 | 0.42527600 | 0.42414700 | 0.42325700 | 0.42321400 | 0.42422700 | 0.42629800 | 0.42923000 | 0.43217600 | 0.43404400 | 0.43435000 | 0.43334500 |
| D1 | 0.36015200 | 0.36012300 | 0.35969300 | 0.35878300 | 0.35778100 | 0.35752200 | 0.35847300 | 0.36038500 | 0.36270900 | 0.36481700 | 0.36610800 | 0.36628200 | 0.36552900 |
| A6 | 0.41225200 | 0.41188600 | 0.41113500 | 0.40994200 | 0.40881900 | 0.40862400 | 0.40974200 | 0.41190100 | 0.41470100 | 0.41760700 | 0.41970400 | 0.42020700 | 0.41919700 |
| A7 | 0.38675700 | 0.38655100 | 0.38594200 | 0.38497800 | 0.38405500 | 0.38380600 | 0.38459100 | 0.38636800 | 0.38881900 | 0.39129300 | 0.39301000 | 0.39347400 | 0.39276600 |
| E1 | 0.42291400 | 0.42256600 | 0.42169900 | 0.42044600 | 0.41946200 | 0.41934000 | 0.42032800 | 0.42240300 | 0.42525500 | 0.42825400 | 0.43051800 | 0.43124100 | 0.43042300 |
| A8 | 0.41348500 | 0.41306400 | 0.41223900 | 0.41113800 | 0.41012000 | 0.40981900 | 0.41075000 | 0.41296500 | 0.41604000 | 0.41907500 | 0.42101900 | 0.42134000 | 0.42036900 |
| A9 | 0.37851600 | 0.37825600 | 0.37750600 | 0.37632700 | 0.37529900 | 0.37520300 | 0.37631300 | 0.37841700 | 0.38106800 | 0.38359100 | 0.38529200 | 0.38573300 | 0.38497400 |
| F1 | 0.23885100 | 0.23857300 | 0.23812200 | 0.23753700 | 0.23705500 | 0.23703300 | 0.23764600 | 0.23888500 | 0.24057800 | 0.24222800 | 0.24324300 | 0.24335100 | 0.24266700 |
| G1 | 0.25609800 | 0.25599700 | 0.25550300 | 0.25465500 | 0.25400200 | 0.25408100 | 0.25489300 | 0.25623200 | 0.25796200 | 0.25973100 | 0.26095100 | 0.26117900 | 0.26045900 |
| B2 | 0.30861800 | 0.30826800 | 0.30757700 | 0.30677000 | 0.30627000 | 0.30650200 | 0.30759800 | 0.30940100 | 0.31166000 | 0.31392300 | 0.31552400 | 0.31589100 | 0.31496600 |

| 4024       | 4026       | 4028       | 4030       | 4032       | 4034       | 4036       | 4038       | 4040       | 4042       | 4043       | 4045       | 4047       | 4049       |
|------------|------------|------------|------------|------------|------------|------------|------------|------------|------------|------------|------------|------------|------------|
| 0.42088200 | 0.41920400 | 0.41765900 | 0.41632200 | 0.41518400 | 0.41396800 | 0.41220200 | 0.40952300 | 0.40606300 | 0.40257200 | 0.40015100 | 0.39970600 | 0.40137800 | 0.40471900 |
| 0.41999100 | 0.41834400 | 0.41668200 | 0.41516000 | 0.41388500 | 0.41265300 | 0.41089900 | 0.40813400 | 0.40452100 | 0.40099600 | 0.39877800 | 0.39860500 | 0.40042800 | 0.40386300 |
| 0.41438100 | 0.41279900 | 0.41148100 | 0.41035400 | 0.40935000 | 0.40838500 | 0.40700300 | 0.40461800 | 0.40119500 | 0.39755200 | 0.39509200 | 0.39492500 | 0.39699400 | 0.40048600 |
| 0.42949800 | 0.42823100 | 0.42698000 | 0.42562600 | 0.42438200 | 0.42319600 | 0.42146600 | 0.41865700 | 0.41493800 | 0.41119800 | 0.40874000 | 0.40856600 | 0.41066300 | 0.41442400 |
| 0.29984800 | 0.29866400 | 0.29754500 | 0.29646500 | 0.29561500 | 0.29493200 | 0.29380200 | 0.29169400 | 0.28877900 | 0.28587200 | 0.28406600 | 0.28407300 | 0.28571900 | 0.28848200 |
| 0.42418000 | 0.42256900 | 0.42105400 | 0.41973100 | 0.41873700 | 0.41777800 | 0.41615800 | 0.41341200 | 0.40973400 | 0.40604300 | 0.40370000 | 0.40363300 | 0.40563600 | 0.40905300 |
| 0.43174300 | 0.43022700 | 0.42889300 | 0.42759100 | 0.42637100 | 0.42507700 | 0.42311400 | 0.42006500 | 0.41620800 | 0.41245000 | 0.41005000 | 0.41002300 | 0.41237400 | 0.41638500 |
| 0.36436100 | 0.36313500 | 0.36187500 | 0.36066400 | 0.35967700 | 0.35869300 | 0.35716800 | 0.35476600 | 0.35166100 | 0.34857100 | 0.34654800 | 0.34642300 | 0.34827400 | 0.35164500 |
| 0.41750300 | 0.41584600 | 0.41440600 | 0.41324600 | 0.41237600 | 0.41133700 | 0.40946800 | 0.40654600 | 0.40286100 | 0.39915100 | 0.39664700 | 0.39642400 | 0.39851500 | 0.40229300 |
| 0.39152700 | 0.39031400 | 0.38910200 | 0.38783300 | 0.38672400 | 0.38565600 | 0.38405200 | 0.38148600 | 0.37807100 | 0.37455000 | 0.37220400 | 0.37208900 | 0.37410400 | 0.37747200 |
| 0.42892400 | 0.42740700 | 0.42586300 | 0.42437900 | 0.42326500 | 0.42225900 | 0.42052200 | 0.41755000 | 0.41370600 | 0.41000100 | 0.40768500 | 0.40762300 | 0.40978400 | 0.41363700 |
| 0.41889200 | 0.41739100 | 0.41589700 | 0.41450600 | 0.41344200 | 0.41250800 | 0.41095700 | 0.40809700 | 0.40404800 | 0.39994800 | 0.39743400 | 0.39750300 | 0.39985300 | 0.40373700 |
| 0.38364900 | 0.38233600 | 0.38107100 | 0.37983700 | 0.37877400 | 0.37766700 | 0.37593100 | 0.37316600 | 0.36957600 | 0.36606500 | 0.36387400 | 0.36380400 | 0.36577300 | 0.36928100 |
| 0.24164700 | 0.24077800 | 0.24009100 | 0.23938700 | 0.23868700 | 0.23797600 | 0.23696300 | 0.23535300 | 0.23311700 | 0.23070100 | 0.22907200 | 0.22902700 | 0.23040400 | 0.23256200 |
| 0.25930800 | 0.25821500 | 0.25726600 | 0.25644900 | 0.25583900 | 0.25522400 | 0.25412300 | 0.25230300 | 0.24992100 | 0.24748000 | 0.24589800 | 0.24593400 | 0.24743700 | 0.24983100 |
| 0.31339200 | 0.31193100 | 0.31079000 | 0.30989400 | 0.30921800 | 0.30851800 | 0.30728700 | 0.30515300 | 0.30220700 | 0.29914700 | 0.29713000 | 0.29703400 | 0.29876300 | 0.30170800 |

| 4051       | 4053       | 4055       | 4057       | 4059       | 4061       | 4063       | 4065       | 4067       | 4069       | 4070       | 4072       | 4074       | 4076       |
|------------|------------|------------|------------|------------|------------|------------|------------|------------|------------|------------|------------|------------|------------|
| 0.40920600 | 0.41401700 | 0.41780400 | 0.41957100 | 0.41984500 | 0.42009900 | 0.42062300 | 0.41991000 | 0.41670900 | 0.41180100 | 0.40709400 | 0.40378900 | 0.40190400 | 0.40081100 |
| 0.40846400 | 0.41338300 | 0.41729900 | 0.41923900 | 0.41965600 | 0.41995500 | 0.42041400 | 0.41953000 | 0.41606500 | 0.41080200 | 0.40571800 | 0.40214600 | 0.40009000 | 0.39882900 |
| 0.40474600 | 0.40920200 | 0.41277700 | 0.41450300 | 0.41492700 | 0.41552500 | 0.41640300 | 0.41590900 | 0.41282800 | 0.40798400 | 0.40328600 | 0.39994800 | 0.39800900 | 0.39691600 |
| 0.41929000 | 0.42443900 | 0.42852000 | 0.43050300 | 0.43083100 | 0.43098700 | 0.43145300 | 0.43081100 | 0.42763700 | 0.42255100 | 0.41750400 | 0.41381900 | 0.41160800 | 0.41031900 |
| 0.29202600 | 0.29580700 | 0.29877100 | 0.30010100 | 0.30026100 | 0.30051100 | 0.30107800 | 0.30068900 | 0.29825700 | 0.29434300 | 0.29056000 | 0.28797000 | 0.28643900 | 0.28529500 |
| 0.41357000 | 0.41865300 | 0.42289700 | 0.42499800 | 0.42534300 | 0.42552200 | 0.42613800 | 0.42567900 | 0.42277100 | 0.41790000 | 0.41292300 | 0.40932400 | 0.40723500 | 0.40584400 |
| 0.42136700 | 0.42653900 | 0.43064300 | 0.43261800 | 0.43294600 | 0.43323400 | 0.43387900 | 0.43325600 | 0.42988200 | 0.42447900 | 0.41921500 | 0.41557500 | 0.41355300 | 0.41238800 |
| 0.35598700 | 0.36052300 | 0.36407200 | 0.36573500 | 0.36594300 | 0.36603000 | 0.36635900 | 0.36569700 | 0.36288800 | 0.35844700 | 0.35399600 | 0.35077000 | 0.34897100 | 0.34802600 |
| 0.40718400 | 0.41243500 | 0.41675700 | 0.41901800 | 0.41954200 | 0.41983400 | 0.42037000 | 0.41969500 | 0.41643300 | 0.41120300 | 0.40597600 | 0.40228000 | 0.40021900 | 0.39890100 |
| 0.38170800 | 0.38630500 | 0.39011300 | 0.39211000 | 0.39268600 | 0.39319300 | 0.39393000 | 0.39337300 | 0.39010000 | 0.38489300 | 0.37999900 | 0.37685300 | 0.37524100 | 0.37416500 |
| 0.41860600 | 0.42372700 | 0.42759400 | 0.42936900 | 0.42971200 | 0.43002900 | 0.43060000 | 0.43003600 | 0.42695700 | 0.42183200 | 0.41668200 | 0.41313900 | 0.41121900 | 0.40990200 |
| 0.40873400 | 0.41412800 | 0.41842500 | 0.42051500 | 0.42102600 | 0.42145200 | 0.42199200 | 0.42116000 | 0.41767400 | 0.41220100 | 0.40679400 | 0.40296500 | 0.40080100 | 0.39954400 |
| 0.37384800 | 0.37872800 | 0.38263500 | 0.38454800 | 0.38497200 | 0.38542000 | 0.38617200 | 0.38556500 | 0.38217400 | 0.37686700 | 0.37186900 | 0.36851600 | 0.36662000 | 0.36539200 |
| 0.23517200 | 0.23791500 | 0.24003500 | 0.24095500 | 0.24112300 | 0.24149500 | 0.24212700 | 0.24191700 | 0.23994100 | 0.23662600 | 0.23333500 | 0.23107800 | 0.22986000 | 0.22908300 |
| 0.25282500 | 0.25603300 | 0.25857800 | 0.25975400 | 0.25994800 | 0.26017100 | 0.26052300 | 0.25996900 | 0.25775500 | 0.25435300 | 0.25099500 | 0.24863900 | 0.24736900 | 0.24665200 |
| 0.30544400 | 0.30944300 | 0.31266000 | 0.31420600 | 0.31443600 | 0.31456500 | 0.31493000 | 0.31441500 | 0.31193800 | 0.30792200 | 0.30390800 | 0.30107200 | 0.29945000 | 0.29839900 |

| 4078       | 4080       | 4082       | 4084       | 4086       | 4088       | 4090       | 4092       | 4094       | 4096       | 4097       | 4099       | 4101       | 4103       |
|------------|------------|------------|------------|------------|------------|------------|------------|------------|------------|------------|------------|------------|------------|
| 0.39990400 | 0.39907800 | 0.39851100 | 0.39808000 | 0.39731000 | 0.39563300 | 0.39265600 | 0.38856800 | 0.38423400 | 0.38068800 | 0.37857600 | 0.37802800 | 0.37874300 | 0.38026400 |
| 0.39780800 | 0.39696500 | 0.39638900 | 0.39590100 | 0.39501500 | 0.39314900 | 0.38994100 | 0.38560700 | 0.38102400 | 0.37727400 | 0.37500300 | 0.37427800 | 0.37490700 | 0.37662900 |
| 0.39612800 | 0.39542700 | 0.39483600 | 0.39424800 | 0.39332700 | 0.39165300 | 0.38885700 | 0.38501600 | 0.38088500 | 0.37742500 | 0.37529300 | 0.37467300 | 0.37527900 | 0.37667300 |
| 0.40945000 | 0.40883200 | 0.40837300 | 0.40786500 | 0.40699100 | 0.40528000 | 0.40228300 | 0.39807800 | 0.39350600 | 0.38968800 | 0.38737200 | 0.38669500 | 0.38732000 | 0.38884300 |
| 0.28424800 | 0.28353400 | 0.28327000 | 0.28310500 | 0.28254600 | 0.28121900 | 0.27892600 | 0.27581200 | 0.27247000 | 0.26968300 | 0.26794700 | 0.26725200 | 0.26736700 | 0.26823000 |
| 0.40461500 | 0.40371200 | 0.40321900 | 0.40272800 | 0.40175100 | 0.39987700 | 0.39673900 | 0.39244500 | 0.38788600 | 0.38420600 | 0.38206300 | 0.38147100 | 0.38210500 | 0.38364700 |
| 0.41151500 | 0.41085200 | 0.41043400 | 0.40999800 | 0.40902000 | 0.40700100 | 0.40366800 | 0.39923300 | 0.39452900 | 0.39058100 | 0.38808800 | 0.38728000 | 0.38791300 | 0.38959000 |
| 0.34735300 | 0.34683700 | 0.34646400 | 0.34598600 | 0.34508700 | 0.34346300 | 0.34080000 | 0.33709500 | 0.33300300 | 0.32957800 | 0.32754800 | 0.32697500 | 0.32748000 | 0.32875100 |
| 0.39768100 | 0.39666500 | 0.39606100 | 0.39566900 | 0.39500000 | 0.39341900 | 0.39038600 | 0.38603800 | 0.38134000 | 0.37744100 | 0.37507000 | 0.37443600 | 0.37525200 | 0.37699600 |
| 0.37302700 | 0.37198700 | 0.37133000 | 0.37089500 | 0.37015700 | 0.36853500 | 0.36565100 | 0.36164000 | 0.35723200 | 0.35348300 | 0.35125900 | 0.35075500 | 0.35149700 | 0.35295500 |
| 0.40860000 | 0.40767400 | 0.40739200 | 0.40719300 | 0.40631800 | 0.40436500 | 0.40115000 | 0.39684900 | 0.39226400 | 0.38842800 | 0.38601200 | 0.38518200 | 0.38575200 | 0.38740500 |
| 0.39860000 | 0.39795400 | 0.39768700 | 0.39747600 | 0.39671900 | 0.39486600 | 0.39164500 | 0.38731000 | 0.38266400 | 0.37870700 | 0.37621200 | 0.37545200 | 0.37612200 | 0.37772800 |
| 0.36441500 | 0.36377800 | 0.36350200 | 0.36318000 | 0.36230700 | 0.36051700 | 0.35755600 | 0.35353800 | 0.34918200 | 0.34547100 | 0.34315700 | 0.34248000 | 0.34313200 | 0.34467300 |
| 0.22838000 | 0.22788000 | 0.22765100 | 0.22736200 | 0.22665000 | 0.22536900 | 0.22344500 | 0.22093300 | 0.21829400 | 0.21617900 | 0.21492300 | 0.21445800 | 0.21460700 | 0.21533100 |
| 0.24602900 | 0.24543400 | 0.24494100 | 0.24447100 | 0.24381300 | 0.24270800 | 0.24089000 | 0.23833600 | 0.23548700 | 0.23300000 | 0.23137000 | 0.23076900 | 0.23102700 | 0.23185100 |
| 0.29751300 | 0.29687600 | 0.29653000 | 0.29617000 | 0.29540900 | 0.29397000 | 0.29164300 | 0.28843000 | 0.28484400 | 0.28178700 | 0.27992700 | 0.27933800 | 0.27973100 | 0.28084100 |

| 4105       | 4107       | 4109       | 4111       | 4113       | 4115       | 4117       | 4119       | 4121       | 4123       | 4124       | 4126       | 4128       | 4130       |
|------------|------------|------------|------------|------------|------------|------------|------------|------------|------------|------------|------------|------------|------------|
| 0.38235000 | 0.38479300 | 0.38694500 | 0.38789000 | 0.38706600 | 0.38463700 | 0.38135100 | 0.37795500 | 0.37483300 | 0.37214800 | 0.36991900 | 0.36806100 | 0.36674300 | 0.36643000 |
| 0.37908100 | 0.38180600 | 0.38414400 | 0.38519400 | 0.38430800 | 0.38165600 | 0.37806400 | 0.37437600 | 0.37100400 | 0.36801000 | 0.36546500 | 0.36349000 | 0.36221700 | 0.36197900 |
| 0.37868600 | 0.38123800 | 0.38373100 | 0.38501600 | 0.38424900 | 0.38164900 | 0.37821800 | 0.37485700 | 0.37193600 | 0.36942700 | 0.36720100 | 0.36535900 | 0.36426300 | 0.36418400 |
| 0.39115400 | 0.39405700 | 0.39665000 | 0.39771500 | 0.39668000 | 0.39395700 | 0.39047700 | 0.38700900 | 0.38385700 | 0.38106300 | 0.37865900 | 0.37671600 | 0.37541800 | 0.37513400 |
| 0.26985100 | 0.27192400 | 0.27376900 | 0.27460000 | 0.27392400 | 0.27196300 | 0.26950300 | 0.26714500 | 0.26499700 | 0.26301600 | 0.26124300 | 0.25978600 | 0.25883100 | 0.25862000 |
| 0.38594300 | 0.38872800 | 0.39121200 | 0.39230900 | 0.39131800 | 0.38847900 | 0.38487500 | 0.38152400 | 0.37869900 | 0.37623100 | 0.37396800 | 0.37191100 | 0.37038200 | 0.36996100 |
| 0.39216600 | 0.39532000 | 0.39802300 | 0.39915900 | 0.39830000 | 0.39567300 | 0.39194600 | 0.38798700 | 0.38441200 | 0.38142100 | 0.37893900 | 0.37689600 | 0.37548800 | 0.37517900 |
| 0.33077700 | 0.33331600 | 0.33550400 | 0.33640300 | 0.33559100 | 0.33333800 | 0.33038200 | 0.32735400 | 0.32450400 | 0.32192000 | 0.31968100 | 0.31786800 | 0.31664700 | 0.31632200 |
| 0.37937000 | 0.38213500 | 0.38455500 | 0.38556200 | 0.38452200 | 0.38172900 | 0.37815200 | 0.37464900 | 0.37149700 | 0.36865500 | 0.36616200 | 0.36421200 | 0.36301600 | 0.36279100 |
| 0.35499800 | 0.35750200 | 0.35976800 | 0.36078100 | 0.35997600 | 0.35760100 | 0.35442200 | 0.35116800 | 0.34820600 | 0.34556500 | 0.34318400 | 0.34114000 | 0.33970800 | 0.33931500 |
| 0.38989500 | 0.39285600 | 0.39543400 | 0.39653800 | 0.39554500 | 0.39271900 | 0.38898700 | 0.38531100 | 0.38216200 | 0.37951700 | 0.37717600 | 0.37515100 | 0.37380400 | 0.37357900 |
| 0.38008100 | 0.38297100 | 0.38554800 | 0.38668200 | 0.38576300 | 0.38301400 | 0.37932900 | 0.37571000 | 0.37262700 | 0.36996800 | 0.36751200 | 0.36531600 | 0.36376700 | 0.36334400 |
| 0.34693200 | 0.34967000 | 0.35210300 | 0.35316800 | 0.35221400 | 0.34947700 | 0.34592800 | 0.34253600 | 0.33963500 | 0.33706700 | 0.33475100 | 0.33287100 | 0.33169200 | 0.33148800 |
| 0.21666500 | 0.21838400 | 0.21991000 | 0.22061000 | 0.22014300 | 0.21863400 | 0.21658000 | 0.21449300 | 0.21262600 | 0.21100900 | 0.20957700 | 0.20834400 | 0.20755400 | 0.20750200 |
| 0.23312500 | 0.23475100 | 0.23629100 | 0.23706100 | 0.23658300 | 0.23493300 | 0.23271000 | 0.23055500 | 0.22871600 | 0.22709000 | 0.22555700 | 0.22420000 | 0.22330600 | 0.22314400 |
| 0.28253500 | 0.28459800 | 0.28643900 | 0.28722400 | 0.28645900 | 0.28438800 | 0.28178600 | 0.27928500 | 0.27700200 | 0.27482100 | 0.27277500 | 0.27113000 | 0.27020000 | 0.27013500 |

| 4132       | 4134       | 4136       | 4138       | 4140       | 4142       | 4144       | 4146       | 4148       | 4150       | 4151       | 4153       | 4155       | 4157       |
|------------|------------|------------|------------|------------|------------|------------|------------|------------|------------|------------|------------|------------|------------|
| 0.36745300 | 0.36984800 | 0.37338700 | 0.37732400 | 0.38039900 | 0.38138400 | 0.37966700 | 0.37568000 | 0.37091100 | 0.36704600 | 0.36506400 | 0.36521900 | 0.36729500 | 0.37060200 |
| 0.36317300 | 0.36585900 | 0.36966400 | 0.37379500 | 0.37704700 | 0.37814900 | 0.37640600 | 0.37227800 | 0.36729700 | 0.36315700 | 0.36092500 | 0.36096200 | 0.36308400 | 0.36660900 |
| 0.36521800 | 0.36746500 | 0.37081600 | 0.37457700 | 0.37756400 | 0.37856600 | 0.37694600 | 0.37317500 | 0.36870000 | 0.36505900 | 0.36316300 | 0.36326200 | 0.36515400 | 0.36826400 |
| 0.37623600 | 0.37884200 | 0.38264700 | 0.38678500 | 0.38995700 | 0.39096100 | 0.38924200 | 0.38522800 | 0.38031000 | 0.37617400 | 0.37398600 | 0.37417400 | 0.37648600 | 0.38008600 |
| 0.25936800 | 0.26116900 | 0.26384200 | 0.26678500 | 0.26904700 | 0.26969500 | 0.26832400 | 0.26537700 | 0.26195000 | 0.25916700 | 0.25769800 | 0.25776300 | 0.25922500 | 0.26161700 |
| 0.37106400 | 0.37372100 | 0.37754100 | 0.38162200 | 0.38466300 | 0.38548000 | 0.38363300 | 0.37970200 | 0.37502400 | 0.37110600 | 0.36909300 | 0.36938100 | 0.37161400 | 0.37506300 |
| 0.37641200 | 0.37925400 | 0.38323500 | 0.38745700 | 0.39070300 | 0.39173800 | 0.38999300 | 0.38596200 | 0.38096600 | 0.37658600 | 0.37413800 | 0.37430400 | 0.37688000 | 0.38086300 |
| 0.31723800 | 0.31953000 | 0.32285100 | 0.32641300 | 0.32917700 | 0.33006800 | 0.32852700 | 0.32505400 | 0.32093200 | 0.31746500 | 0.31558500 | 0.31575200 | 0.31782700 | 0.32105500 |
| 0.36389300 | 0.36659800 | 0.37061200 | 0.37494500 | 0.37824000 | 0.37921300 | 0.37724700 | 0.37293900 | 0.36793500 | 0.36396200 | 0.36202400 | 0.36234300 | 0.36463000 | 0.36819200 |
| 0.34037200 | 0.34295800 | 0.34660500 | 0.35042600 | 0.35336500 | 0.35438700 | 0.35286500 | 0.34915600 | 0.34459200 | 0.34069700 | 0.33855800 | 0.33868000 | 0.34087900 | 0.34432600 |
| 0.37474700 | 0.37738700 | 0.38124300 | 0.38547200 | 0.38873900 | 0.38973600 | 0.38784500 | 0.38362000 | 0.37866000 | 0.37465500 | 0.37256000 | 0.37264500 | 0.37472500 | 0.37817400 |
| 0.36442200 | 0.36712900 | 0.37113000 | 0.37550300 | 0.37886300 | 0.37984300 | 0.37788800 | 0.37370500 | 0.36886100 | 0.36490500 | 0.36280400 | 0.36294900 | 0.36522200 | 0.36894800 |
| 0.33253300 | 0.33494400 | 0.33848000 | 0.34242200 | 0.34558600 | 0.34668300 | 0.34507700 | 0.34131100 | 0.33676800 | 0.33289800 | 0.33071500 | 0.33069900 | 0.33276900 | 0.33623600 |
| 0.20827500 | 0.20981600 | 0.21198400 | 0.21436300 | 0.21621300 | 0.21673600 | 0.21555500 | 0.21302500 | 0.21008100 | 0.20767800 | 0.20637900 | 0.20637400 | 0.20757500 | 0.20957500 |
| 0.22383600 | 0.22542300 | 0.22772800 | 0.23017000 | 0.23196700 | 0.23243700 | 0.23122400 | 0.22869500 | 0.22583200 | 0.22352900 | 0.22229000 | 0.22237300 | 0.22367900 | 0.22570800 |
| 0.27102100 | 0.27300200 | 0.27593300 | 0.27910700 | 0.28149400 | 0.28217100 | 0.28072000 | 0.27755500 | 0.27380300 | 0.27068200 | 0.26900800 | 0.26912400 | 0.27087100 | 0.27361500 |

| 4159       | 4161       | 4163       | 4165       | 4167       | 4169       | 4171       | 4173       | 4175       | 4177       | 4178       | 4180       | 4182       | 4184       |
|------------|------------|------------|------------|------------|------------|------------|------------|------------|------------|------------|------------|------------|------------|
| 0.37424400 | 0.37766600 | 0.38064400 | 0.38248400 | 0.38182800 | 0.37825800 | 0.37356400 | 0.37026800 | 0.36951000 | 0.37093400 | 0.37364800 | 0.37669900 | 0.37914900 | 0.38019300 |
| 0.37060900 | 0.37444800 | 0.37781500 | 0.37989100 | 0.37916900 | 0.37522900 | 0.37007700 | 0.36647700 | 0.36566800 | 0.36725800 | 0.37020400 | 0.37344500 | 0.37609900 | 0.37734200 |
| 0.37182300 | 0.37529000 | 0.37834000 | 0.38018800 | 0.37955300 | 0.37613000 | 0.37161500 | 0.36840700 | 0.36766400 | 0.36903300 | 0.37161100 | 0.37451500 | 0.37683800 | 0.37772600 |
| 0.38401400 | 0.38774200 | 0.39102900 | 0.39305700 | 0.39231800 | 0.38838900 | 0.38330000 | 0.37983700 | 0.37913300 | 0.38063400 | 0.38334000 | 0.38637300 | 0.38894300 | 0.39024500 |
| 0.26433900 | 0.26701200 | 0.26948300 | 0.27116000 | 0.27086200 | 0.26817000 | 0.26450500 | 0.26191800 | 0.26129500 | 0.26226800 | 0.26413400 | 0.26626200 | 0.26803000 | 0.26880300 |
| 0.37895000 | 0.38268000 | 0.38592600 | 0.38793200 | 0.38726300 | 0.38353400 | 0.37866600 | 0.37526400 | 0.37449100 | 0.37598300 | 0.37883300 | 0.38207900 | 0.38469800 | 0.38577300 |
| 0.38513000 | 0.38909700 | 0.39251200 | 0.39454200 | 0.39373300 | 0.38974000 | 0.38456600 | 0.38097300 | 0.38021500 | 0.38187200 | 0.38489600 | 0.38821600 | 0.39086600 | 0.39196400 |
| 0.32445700 | 0.32748300 | 0.33010100 | 0.33180500 | 0.33124100 | 0.32789300 | 0.32344900 | 0.32035100 | 0.31967500 | 0.32100800 | 0.32349300 | 0.32629200 | 0.32854500 | 0.32950300 |
| 0.37212800 | 0.37584300 | 0.37906000 | 0.38093900 | 0.38005100 | 0.37619800 | 0.37139300 | 0.36808800 | 0.36730000 | 0.36874700 | 0.37162900 | 0.37496800 | 0.37774100 | 0.37899100 |
| 0.34807000 | 0.35158700 | 0.35465000 | 0.35652700 | 0.35584900 | 0.35226600 | 0.34765000 | 0.34450700 | 0.34385800 | 0.34524200 | 0.34783800 | 0.35085000 | 0.35331800 | 0.35430100 |
| 0.38217200 | 0.38612400 | 0.38960400 | 0.39165100 | 0.39084500 | 0.38697600 | 0.38198900 | 0.37848000 | 0.37770900 | 0.37932800 | 0.38233900 | 0.38572300 | 0.38847300 | 0.38961800 |
| 0.37312200 | 0.37703200 | 0.38041200 | 0.38255700 | 0.38197100 | 0.37812000 | 0.37293300 | 0.36929000 | 0.36852000 | 0.37010900 | 0.37300700 | 0.37632700 | 0.37911700 | 0.38028400 |
| 0.34009400 | 0.34367800 | 0.34679700 | 0.34878900 | 0.34821800 | 0.34462200 | 0.33980800 | 0.33634900 | 0.33550700 | 0.33698600 | 0.33980300 | 0.34288500 | 0.34522200 | 0.34601400 |
| 0.21180100 | 0.21390700 | 0.21577100 | 0.21689300 | 0.21635400 | 0.21395800 | 0.21092900 | 0.20883700 | 0.20831400 | 0.20908000 | 0.21059300 | 0.21234400 | 0.21381700 | 0.21444700 |
| 0.22795100 | 0.23019000 | 0.23227800 | 0.23362200 | 0.23323500 | 0.23085300 | 0.22767700 | 0.22536900 | 0.22471800 | 0.22555900 | 0.22729100 | 0.22917400 | 0.23055800 | 0.23103500 |
| 0.27659900 | 0.27944400 | 0.28202800 | 0.28369900 | 0.28325500 | 0.28037900 | 0.27651900 | 0.27372500 | 0.27302600 | 0.27415800 | 0.27632200 | 0.27874100 | 0.28070000 | 0.28154400 |

| 4186       | 4188       | 4190       | 4192       | 4194       | 4196       | 4198       | 4200       | 4202       | 4204       | 4205       | 4207       | 4209       | 4211       |
|------------|------------|------------|------------|------------|------------|------------|------------|------------|------------|------------|------------|------------|------------|
| 0.37937700 | 0.37686600 | 0.37341500 | 0.36995900 | 0.36721000 | 0.36553000 | 0.36498400 | 0.36543800 | 0.36662500 | 0.36814700 | 0.36953700 | 0.37038400 | 0.37042800 | 0.36961300 |
| 0.37654700 | 0.37377300 | 0.36989800 | 0.36613100 | 0.36333000 | 0.36172600 | 0.36124300 | 0.36173900 | 0.36292400 | 0.36441100 | 0.36583200 | 0.36675200 | 0.36673000 | 0.36567800 |
| 0.37675500 | 0.37417600 | 0.37079900 | 0.36755500 | 0.36507000 | 0.36358200 | 0.36307800 | 0.36346600 | 0.36457500 | 0.36601200 | 0.36723700 | 0.36784600 | 0.36767000 | 0.36676500 |
| 0.38961800 | 0.38702500 | 0.38327400 | 0.37955300 | 0.37670400 | 0.37501100 | 0.37449800 | 0.37505800 | 0.37635800 | 0.37793900 | 0.37933700 | 0.38013300 | 0.38006400 | 0.37917500 |
| 0.26812100 | 0.26608200 | 0.26338200 | 0.26082500 | 0.25891300 | 0.25776900 | 0.25733600 | 0.25755400 | 0.25828800 | 0.25924000 | 0.26005800 | 0.26049800 | 0.26045800 | 0.25992600 |
| 0.38485200 | 0.38211200 | 0.37831500 | 0.37455400 | 0.37169200 | 0.37001900 | 0.36952100 | 0.37004400 | 0.37119400 | 0.37255400 | 0.37387100 | 0.37483000 | 0.37503100 | 0.37434400 |
| 0.39091900 | 0.38791500 | 0.38391100 | 0.38004200 | 0.37712900 | 0.37551900 | 0.37520400 | 0.37600400 | 0.37752900 | 0.37915700 | 0.38035200 | 0.38088200 | 0.38065200 | 0.37966500 |
| 0.32878300 | 0.32650800 | 0.32328600 | 0.31996200 | 0.31729800 | 0.31574500 | 0.31535100 | 0.31587500 | 0.31694800 | 0.31819300 | 0.31932300 | 0.32004600 | 0.32003300 | 0.31917000 |
| 0.37811200 | 0.37526600 | 0.37141500 | 0.36774800 | 0.36500300 | 0.36337300 | 0.36286200 | 0.36342400 | 0.36481500 | 0.36655300 | 0.36809300 | 0.36897600 | 0.36889400 | 0.36782500 |
| 0.35335300 | 0.35074500 | 0.34726100 | 0.34378000 | 0.34098200 | 0.33925300 | 0.33868600 | 0.33916900 | 0.34039200 | 0.34188800 | 0.34321500 | 0.34401500 | 0.34400900 | 0.34317300 |
| 0.38856200 | 0.38555800 | 0.38165300 | 0.37798600 | 0.37526900 | 0.37377300 | 0.37344600 | 0.37406500 | 0.37536900 | 0.37699200 | 0.37844000 | 0.37927500 | 0.37923100 | 0.37828800 |
| 0.37918100 | 0.37614200 | 0.37223300 | 0.36853300 | 0.36571200 | 0.36408300 | 0.36371400 | 0.36440000 | 0.36574700 | 0.36733300 | 0.36871500 | 0.36950100 | 0.36947400 | 0.36861100 |
| 0.34494700 | 0.34234600 | 0.33898000 | 0.33564500 | 0.33293400 | 0.33122700 | 0.33072000 | 0.33131800 | 0.33260000 | 0.33406700 | 0.33536200 | 0.33615200 | 0.33610100 | 0.33515500 |
| 0.21385900 | 0.21216000 | 0.20986100 | 0.20755700 | 0.20571800 | 0.20457200 | 0.20409500 | 0.20416600 | 0.20464400 | 0.20533100 | 0.20602300 | 0.20649400 | 0.20647200 | 0.20587400 |
| 0.23041700 | 0.22875300 | 0.22643200 | 0.22407200 | 0.22220600 | 0.22105800 | 0.22061500 | 0.22078700 | 0.22142800 | 0.22227700 | 0.22301800 | 0.22339600 | 0.22325800 | 0.22257800 |
| 0.28091500 | 0.27897100 | 0.27628100 | 0.27354600 | 0.27131700 | 0.26985700 | 0.26923700 | 0.26940400 | 0.27011300 | 0.27104500 | 0.27199700 | 0.27276400 | 0.27300100 | 0.27246700 |



| 4213       | 4215       | 4217       | 4219       | 4221       | 4223       | 4225       | 4227       | 4229       | 4231       | 4232       | 4234       | 4236       | 4238       |
|------------|------------|------------|------------|------------|------------|------------|------------|------------|------------|------------|------------|------------|------------|
| 0.36814900 | 0.36640700 | 0.36464200 | 0.36280400 | 0.36080500 | 0.35889300 | 0.35746000 | 0.35661000 | 0.35616900 | 0.35592300 | 0.35571400 | 0.35546500 | 0.35517900 | 0.35485400 |
| 0.36399600 | 0.36220800 | 0.36051800 | 0.35878900 | 0.35688300 | 0.35493200 | 0.35326200 | 0.35213900 | 0.35160600 | 0.35146200 | 0.35141900 | 0.35132900 | 0.35115300 | 0.35079600 |
| 0.36545700 | 0.36410700 | 0.36276300 | 0.36125400 | 0.35954000 | 0.35777600 | 0.35619300 | 0.35503300 | 0.35437300 | 0.35403300 | 0.35380300 | 0.35362600 | 0.35347000 | 0.35322600 |
| 0.37780500 | 0.37628600 | 0.37465000 | 0.37278400 | 0.37073100 | 0.36875700 | 0.36718100 | 0.36609600 | 0.36539700 | 0.36503000 | 0.36490600 | 0.36483500 | 0.36471600 | 0.36453200 |
| 0.25900700 | 0.25788200 | 0.25662900 | 0.25522700 | 0.25372200 | 0.25227900 | 0.25108600 | 0.25024300 | 0.24973700 | 0.24947400 | 0.24929500 | 0.24907300 | 0.24882900 | 0.24860400 |
| 0.37302000 | 0.37138600 | 0.36956000 | 0.36752700 | 0.36539300 | 0.36344100 | 0.36192600 | 0.36090100 | 0.36027100 | 0.35991400 | 0.35971700 | 0.35956700 | 0.35939700 | 0.35916000 |
| 0.37819900 | 0.37667400 | 0.37524000 | 0.37365900 | 0.37167400 | 0.36948200 | 0.36768000 | 0.36660500 | 0.36605900 | 0.36575200 | 0.36561400 | 0.36557100 | 0.36541500 | 0.36504100 |
| 0.31772900 | 0.31617000 | 0.31475000 | 0.31331100 | 0.31162900 | 0.30988700 | 0.30847000 | 0.30749700 | 0.30682200 | 0.30631400 | 0.30598900 | 0.30587000 | 0.30580300 | 0.30558500 |
| 0.36618000 | 0.36451700 | 0.36296200 | 0.36121600 | 0.35915800 | 0.35710600 | 0.35547000 | 0.35440600 | 0.35382000 | 0.35355400 | 0.35346000 | 0.35334900 | 0.35309300 | 0.35273200 |
| 0.34180400 | 0.34027900 | 0.33871500 | 0.33694000 | 0.33490100 | 0.33294100 | 0.33149300 | 0.33063000 | 0.33011700 | 0.32976100 | 0.32951700 | 0.32934500 | 0.32914500 | 0.32882300 |
| 0.37676200 | 0.37508900 | 0.37339700 | 0.37151600 | 0.36940100 | 0.36730700 | 0.36558700 | 0.36447300 | 0.36396100 | 0.36381200 | 0.36372600 | 0.36354800 | 0.36324200 | 0.36277900 |
| 0.36714100 | 0.36548200 | 0.36381200 | 0.36192800 | 0.35971500 | 0.35749100 | 0.35572600 | 0.35466500 | 0.35425800 | 0.35421600 | 0.35416900 | 0.35396000 | 0.35367100 | 0.35333900 |
| 0.33364900 | 0.33201600 | 0.33045200 | 0.32881700 | 0.32695700 | 0.32507100 | 0.32354900 | 0.32255200 | 0.32201200 | 0.32180900 | 0.32172300 | 0.32151800 | 0.32118100 | 0.32080900 |
| 0.20493400 | 0.20392800 | 0.20290600 | 0.20176800 | 0.20049600 | 0.19924800 | 0.19825200 | 0.19760500 | 0.19718900 | 0.19686800 | 0.19663500 | 0.19649100 | 0.19635900 | 0.19621500 |
| 0.22151700 | 0.22034500 | 0.21921100 | 0.21802900 | 0.21670500 | 0.21540300 | 0.21437500 | 0.21366200 | 0.21319200 | 0.21294400 | 0.21281300 | 0.21263200 | 0.21238100 | 0.21211600 |
| 0.27132200 | 0.26995300 | 0.26853800 | 0.26703500 | 0.26543900 | 0.26388200 | 0.26256700 | 0.26167300 | 0.26121000 | 0.26099900 | 0.26086600 | 0.26073300 | 0.26055100 | 0.26028000 |

| 4240       | 4242       | 4244       | 4246       | 4248       | 4250       | 4252       | 4254       | 4256       | 4258       | 4259       | 4261       | 4263       | 4265       |
|------------|------------|------------|------------|------------|------------|------------|------------|------------|------------|------------|------------|------------|------------|
| 0.35441000 | 0.35381400 | 0.35313600 | 0.35240000 | 0.35159000 | 0.35081300 | 0.35036800 | 0.35069600 | 0.35223800 | 0.35523300 | 0.35939100 | 0.36365500 | 0.36674600 | 0.36821000 |
| 0.35022400 | 0.34957400 | 0.34888600 | 0.34799800 | 0.34690400 | 0.34591300 | 0.34540300 | 0.34574200 | 0.34740000 | 0.35072500 | 0.35536400 | 0.36009300 | 0.36351000 | 0.36510100 |
| 0.35281800 | 0.35225900 | 0.35153400 | 0.35060900 | 0.34960700 | 0.34879500 | 0.34841900 | 0.34872900 | 0.35015700 | 0.35314100 | 0.35743500 | 0.36180400 | 0.36487000 | 0.36620900 |
| 0.36421700 | 0.36369500 | 0.36293100 | 0.36193400 | 0.36080000 | 0.35977300 | 0.35924500 | 0.35965400 | 0.36139900 | 0.36472100 | 0.36928400 | 0.37390200 | 0.37717800 | 0.37861400 |
| 0.24833700 | 0.24796600 | 0.24745700 | 0.24680000 | 0.24605600 | 0.24537800 | 0.24501800 | 0.24530100 | 0.24650100 | 0.24877100 | 0.25194900 | 0.25528400 | 0.25776500 | 0.25895400 |
| 0.35879100 | 0.35829400 | 0.35771700 | 0.35698600 | 0.35598100 | 0.35488700 | 0.35427100 | 0.35471100 | 0.35654400 | 0.35987200 | 0.36430600 | 0.36873800 | 0.37193300 | 0.37347400 |
| 0.36456100 | 0.36404400 | 0.36334500 | 0.36234100 | 0.36118200 | 0.36024200 | 0.35990500 | 0.36046400 | 0.36224200 | 0.36554200 | 0.37010600 | 0.37476800 | 0.37813300 | 0.37971000 |
| 0.30520400 | 0.30475700 | 0.30424400 | 0.30357200 | 0.30269700 | 0.30177600 | 0.30120900 | 0.30146800 | 0.30291700 | 0.30573500 | 0.30962900 | 0.31359600 | 0.31643600 | 0.31770700 |
| 0.35234600 | 0.35190700 | 0.35129200 | 0.35039700 | 0.34928900 | 0.34825700 | 0.34775800 | 0.34821500 | 0.34995500 | 0.35327600 | 0.35796600 | 0.36277300 | 0.36616400 | 0.36768100 |
| 0.32840800 | 0.32800600 | 0.32756800 | 0.32689400 | 0.32597600 | 0.32508900 | 0.32458800 | 0.32483900 | 0.32627200 | 0.32923500 | 0.33352700 | 0.33802400 | 0.34125000 | 0.34264200 |
| 0.36221400 | 0.36167400 | 0.36112500 | 0.36040700 | 0.35952300 | 0.35868100 | 0.35820200 | 0.35849900 | 0.36006800 | 0.36326600 | 0.36781000 | 0.37250000 | 0.37589700 | 0.37750200 |
| 0.35290100 | 0.35238000 | 0.35180300 | 0.35102000 | 0.34994600 | 0.34884400 | 0.34824500 | 0.34869000 | 0.35055700 | 0.35399600 | 0.35867700 | 0.36344600 | 0.36682000 | 0.36822800 |
| 0.32040900 | 0.31996800 | 0.31949900 | 0.31892400 | 0.31810700 | 0.31713000 | 0.31645700 | 0.31665600 | 0.31814800 | 0.32119700 | 0.32554500 | 0.33002000 | 0.33320200 | 0.33462300 |
| 0.19605400 | 0.19576700 | 0.19525800 | 0.19461100 | 0.19401300 | 0.19359200 | 0.19342500 | 0.19368100 | 0.19462900 | 0.19644600 | 0.19891900 | 0.20136800 | 0.20306700 | 0.20379400 |
| 0.21182800 | 0.21150800 | 0.21115700 | 0.21068100 | 0.20999900 | 0.20930200 | 0.20895300 | 0.20917700 | 0.21014600 | 0.21207600 | 0.21484100 | 0.21769800 | 0.21973600 | 0.22062400 |
| 0.25989300 | 0.25939700 | 0.25883900 | 0.25820700 | 0.25746200 | 0.25676000 | 0.25645400 | 0.25686000 | 0.25820400 | 0.26066000 | 0.26406600 | 0.26761200 | 0.27024600 | 0.27155600 |

| 4267       | 4269       | 4271       | 4273       | 4275       | 4277       | 4279       | 4281       | 4283       | 4285       | 4286       | 4288       | 4290       | 4292       |
|------------|------------|------------|------------|------------|------------|------------|------------|------------|------------|------------|------------|------------|------------|
| 0.36870500 | 0.36921300 | 0.37015600 | 0.37119100 | 0.37161500 | 0.37094200 | 0.36926500 | 0.36716000 | 0.36521400 | 0.36356200 | 0.36186100 | 0.35981800 | 0.35753500 | 0.35523700 |
| 0.36556600 | 0.36605900 | 0.36714300 | 0.36839900 | 0.36890900 | 0.36807600 | 0.36607700 | 0.36365300 | 0.36152200 | 0.35984500 | 0.35818000 | 0.35607200 | 0.35352800 | 0.35087500 |
| 0.36656300 | 0.36710600 | 0.36835200 | 0.36972500 | 0.37024700 | 0.36946800 | 0.36767900 | 0.36551400 | 0.36349600 | 0.36177700 | 0.36010700 | 0.35814100 | 0.35585000 | 0.35350400 |
| 0.37895300 | 0.37940900 | 0.38055100 | 0.38186700 | 0.38239400 | 0.38163500 | 0.37982500 | 0.37757300 | 0.37544200 | 0.37362200 | 0.37185200 | 0.36975300 | 0.36724200 | 0.36461900 |
| 0.25929900 | 0.25960900 | 0.26031200 | 0.26113500 | 0.26145200 | 0.26088000 | 0.25951400 | 0.25780300 | 0.25623500 | 0.25496300 | 0.25373300 | 0.25223400 | 0.25042800 | 0.24854400 |
| 0.37400600 | 0.37461200 | 0.37581100 | 0.37707500 | 0.37744400 | 0.37644700 | 0.37439600 | 0.37210100 | 0.37022100 | 0.36872100 | 0.36707700 | 0.36492400 | 0.36236100 | 0.35975400 |
| 0.38021100 | 0.38076100 | 0.38190700 | 0.38328100 | 0.38397900 | 0.38333900 | 0.38149700 | 0.37915800 | 0.37693600 | 0.37496200 | 0.37296800 | 0.37065800 | 0.36803900 | 0.36541600 |
| 0.31803200 | 0.31847300 | 0.31956000 | 0.32083600 | 0.32135700 | 0.32064100 | 0.31896400 | 0.31692800 | 0.31504500 | 0.31350800 | 0.31206500 | 0.31029000 | 0.30810400 | 0.30584800 |
| 0.36814000 | 0.36869100 | 0.36987000 | 0.37124900 | 0.37184300 | 0.37103300 | 0.36909300 | 0.36680800 | 0.36473000 | 0.36289600 | 0.36104100 | 0.35890500 | 0.35642100 | 0.35376300 |
| 0.34297000 | 0.34340900 | 0.34445600 | 0.34563200 | 0.34604700 | 0.34527700 | 0.34359800 | 0.34155300 | 0.33961200 | 0.33793900 | 0.33628000 | 0.33426700 | 0.33183000 | 0.32928300 |
| 0.37804900 | 0.37861700 | 0.37970900 | 0.38098800 | 0.38160200 | 0.38093000 | 0.37909800 | 0.37678300 | 0.37464600 | 0.37290200 | 0.37120200 | 0.36904500 | 0.36640600 | 0.36375600 |
| 0.36852800 | 0.36909100 | 0.37046500 | 0.37198600 | 0.37259300 | 0.37177900 | 0.36983900 | 0.36752300 | 0.36547200 | 0.36380200 | 0.36208600 | 0.35981700 | 0.35698100 | 0.35411800 |
| 0.33503600 | 0.33557100 | 0.33669800 | 0.33792000 | 0.33831700 | 0.33740400 | 0.33551700 | 0.33341000 | 0.33158200 | 0.32999500 | 0.32830300 | 0.32623300 | 0.32382400 | 0.32138900 |
| 0.20394700 | 0.20413200 | 0.20461100 | 0.20512900 | 0.20525000 | 0.20476300 | 0.20375800 | 0.20248200 | 0.20122100 | 0.20015300 | 0.19915100 | 0.19794600 | 0.19649400 | 0.19500600 |
| 0.22082400 | 0.22105800 | 0.22165000 | 0.22236300 | 0.22266800 | 0.22220100 | 0.22106700 | 0.21967600 | 0.21835300 | 0.21715800 | 0.21595400 | 0.21460700 | 0.21309700 | 0.21149300 |
| 0.27203700 | 0.27249400 | 0.27332000 | 0.27419700 | 0.27443000 | 0.27360600 | 0.27192200 | 0.26996000 | 0.26826600 | 0.26698700 | 0.26578200 | 0.26421600 | 0.26222200 | 0.26011600 |

| 4294       | 4296       | 4298       | 4300       | 4302       | 4304       | 4306       | 4308       | 4310       | 4312       | 4313       | 4315       | 4317       | 4319       |
|------------|------------|------------|------------|------------|------------|------------|------------|------------|------------|------------|------------|------------|------------|
| 0.35311000 | 0.35155000 | 0.35115700 | 0.35235200 | 0.35520900 | 0.35958400 | 0.36510100 | 0.37113000 | 0.37704400 | 0.38247800 | 0.38734800 | 0.39170500 | 0.39567800 | 0.39944800 |
| 0.34855100 | 0.34704100 | 0.34674700 | 0.34797400 | 0.35098000 | 0.35576500 | 0.36177700 | 0.36810600 | 0.37413700 | 0.37978100 | 0.38507600 | 0.38994900 | 0.39438100 | 0.39849700 |
| 0.35144400 | 0.35007700 | 0.34981700 | 0.35092800 | 0.35355900 | 0.35772400 | 0.36310100 | 0.36904000 | 0.37488600 | 0.38026200 | 0.38508800 | 0.38941600 | 0.39333100 | 0.39697100 |
| 0.36236800 | 0.36098500 | 0.36085500 | 0.36218500 | 0.36514100 | 0.36979200 | 0.37573300 | 0.38220600 | 0.38859900 | 0.39455900 | 0.39990800 | 0.40460900 | 0.40877500 | 0.41269800 |
| 0.24688500 | 0.24574500 | 0.24545900 | 0.24634300 | 0.24853100 | 0.25190900 | 0.25613800 | 0.26075400 | 0.26535500 | 0.26968900 | 0.27363900 | 0.27717600 | 0.28035100 | 0.28333300 |
| 0.35748700 | 0.35595300 | 0.35558900 | 0.35672800 | 0.35953200 | 0.36400300 | 0.36984700 | 0.37640300 | 0.38290900 | 0.38887500 | 0.39417800 | 0.39888300 | 0.40312500 | 0.40709600 |
| 0.36316200 | 0.36165400 | 0.36132900 | 0.36257800 | 0.36563600 | 0.37050400 | 0.37675500 | 0.38356900 | 0.39016100 | 0.39612700 | 0.40147000 | 0.40632000 | 0.41072200 | 0.41481000 |
| 0.30389300 | 0.30252500 | 0.30210600 | 0.30301300 | 0.30547500 | 0.30946700 | 0.31458500 | 0.32015100 | 0.32558200 | 0.33060000 | 0.33518200 | 0.33939000 | 0.34325700 | 0.34685100 |
| 0.35133500 | 0.34968900 | 0.34933900 | 0.35063900 | 0.35376000 | 0.35861700 | 0.36477600 | 0.37149400 | 0.37800700 | 0.38396300 | 0.38939400 | 0.39428900 | 0.39863400 | 0.40269000 |
| 0.32713800 | 0.32583000 | 0.32564200 | 0.32681700 | 0.32956300 | 0.33387100 | 0.33936000 | 0.34541000 | 0.35149100 | 0.35724700 | 0.36238900 | 0.36681600 | 0.37076200 | 0.37458100 |
| 0.36158700 | 0.36019300 | 0.35985200 | 0.36096100 | 0.36388800 | 0.36866000 | 0.37481000 | 0.38155300 | 0.38814300 | 0.39416200 | 0.39954100 | 0.40439000 | 0.40884800 | 0.41304500 |
| 0.35182600 | 0.35045100 | 0.35021600 | 0.35140700 | 0.35434600 | 0.35910300 | 0.36520400 | 0.37183200 | 0.37832700 | 0.38436400 | 0.38982000 | 0.39469000 | 0.39908300 | 0.40319800 |
| 0.31931300 | 0.31795600 | 0.31764900 | 0.31871500 | 0.32143600 | 0.32584100 | 0.33148500 | 0.33760900 | 0.34360600 | 0.34920100 | 0.35426800 | 0.35876500 | 0.36284400 | 0.36679500 |
| 0.19372700 | 0.19288400 | 0.19268000 | 0.19329100 | 0.19487700 | 0.19746600 | 0.20081100 | 0.20449600 | 0.20815300 | 0.21154500 | 0.21452600 | 0.21708000 | 0.21936800 | 0.22159200 |
| 0.21001300 | 0.20903600 | 0.20886200 | 0.20962500 | 0.21144700 | 0.21437100 | 0.21810200 | 0.22211000 | 0.22600600 | 0.22964700 | 0.23295900 | 0.23587600 | 0.23845600 | 0.24090600 |
| 0.25831300 | 0.25716500 | 0.25693000 | 0.25780400 | 0.25999000 | 0.26357000 | 0.26823600 | 0.27333900 | 0.27835200 | 0.28304300 | 0.28727300 | 0.29101800 | 0.29447200 | 0.29781900 |

| 4321       | 4323       | 4325       | 4327       | 4329       | 4331       | 4333       | 4335       | 4337       | 4339       | 4340       | 4342       | 4344       | 4346       |
|------------|------------|------------|------------|------------|------------|------------|------------|------------|------------|------------|------------|------------|------------|
| 0.40306200 | 0.40627300 | 0.40858200 | 0.40926400 | 0.40779700 | 0.40451500 | 0.40059900 | 0.39747900 | 0.39626900 | 0.39743000 | 0.40070500 | 0.40541700 | 0.41086700 | 0.41634700 |
| 0.40242400 | 0.40601200 | 0.40863400 | 0.40941200 | 0.40785600 | 0.40436300 | 0.40018900 | 0.39687200 | 0.39556300 | 0.39671700 | 0.40015900 | 0.40529800 | 0.41131600 | 0.41727200 |
| 0.40045800 | 0.40370400 | 0.40617900 | 0.40698700 | 0.40554000 | 0.40223800 | 0.39833200 | 0.39525300 | 0.39405400 | 0.39514000 | 0.39828400 | 0.40291600 | 0.40832800 | 0.41362900 |
| 0.41655600 | 0.42005400 | 0.42251200 | 0.42315900 | 0.42157800 | 0.41822500 | 0.41430300 | 0.41114500 | 0.40981700 | 0.41090400 | 0.41429000 | 0.41927500 | 0.42505700 | 0.43090200 |
| 0.28627300 | 0.28899000 | 0.29090400 | 0.29135800 | 0.29011300 | 0.28762200 | 0.28477800 | 0.28249400 | 0.28155400 | 0.28242400 | 0.28500700 | 0.28876200 | 0.29302800 | 0.29715600 |
| 0.41091200 | 0.41438800 | 0.41691300 | 0.41763600 | 0.41605400 | 0.41261800 | 0.40860700 | 0.40545100 | 0.40420900 | 0.40535600 | 0.40877200 | 0.41388800 | 0.41981300 | 0.42552000 |
| 0.41881300 | 0.42254300 | 0.42524400 | 0.42606200 | 0.42455000 | 0.42105100 | 0.41676400 | 0.41329000 | 0.41191200 | 0.41314300 | 0.41675500 | 0.42200600 | 0.42792600 | 0.43368300 |
| 0.35025400 | 0.35330600 | 0.35548800 | 0.35611000 | 0.35470800 | 0.35157300 | 0.34787000 | 0.34496400 | 0.34380200 | 0.34482500 | 0.34793900 | 0.35251200 | 0.35769700 | 0.36270400 |
| 0.40668600 | 0.41034600 | 0.41292500 | 0.41360800 | 0.41200600 | 0.40850200 | 0.40426700 | 0.40088000 | 0.39962700 | 0.40096900 | 0.40458900 | 0.40982000 | 0.41589600 | 0.42192200 |
| 0.37837500 | 0.38185400 | 0.38435100 | 0.38502000 | 0.38339800 | 0.37997300 | 0.37605100 | 0.37306300 | 0.37197200 | 0.37313700 | 0.37642200 | 0.38131200 | 0.38703700 | 0.39267100 |
| 0.41703100 | 0.42060900 | 0.42317100 | 0.42387700 | 0.42228900 | 0.41888300 | 0.41485000 | 0.41152700 | 0.41002200 | 0.41099000 | 0.41444900 | 0.41983300 | 0.42618400 | 0.43231500 |
| 0.40716100 | 0.41073500 | 0.41322400 | 0.41381500 | 0.41212400 | 0.40856200 | 0.40438000 | 0.40114600 | 0.39995800 | 0.40121200 | 0.40477300 | 0.41002100 | 0.41603400 | 0.42190800 |
| 0.37071100 | 0.37423000 | 0.37667700 | 0.37735600 | 0.37590100 | 0.37267200 | 0.36878800 | 0.36567000 | 0.36441000 | 0.36545000 | 0.36865300 | 0.37343200 | 0.37901000 | 0.38462600 |
| 0.22381800 | 0.22587500 | 0.22730200 | 0.22755600 | 0.22648200 | 0.22448000 | 0.22225800 | 0.22057600 | 0.22000900 | 0.22075300 | 0.22266400 | 0.22543400 | 0.22870900 | 0.23204600 |
| 0.24334500 | 0.24556500 | 0.24710100 | 0.24746900 | 0.24641900 | 0.24421600 | 0.24167600 | 0.23978800 | 0.23918300 | 0.23999700 | 0.24210300 | 0.24521400 | 0.24885500 | 0.25245000 |
| 0.30101600 | 0.30381200 | 0.30574600 | 0.30619100 | 0.30482100 | 0.30208600 | 0.29903700 | 0.29674300 | 0.29594100 | 0.29690400 | 0.29950500 | 0.30338700 | 0.30803400 | 0.31272100 |

| 4348       | 4350       | 4352       | 4354       | 4356       | 4358       | 4360       | 4362       | 4364       | 4366       | 4367       | 4369       | 4371       | 4373       |
|------------|------------|------------|------------|------------|------------|------------|------------|------------|------------|------------|------------|------------|------------|
| 0.42094300 | 0.42365800 | 0.42384800 | 0.42148800 | 0.41700200 | 0.41110600 | 0.40490800 | 0.39975300 | 0.39668100 | 0.39609200 | 0.39776600 | 0.40095200 | 0.40451800 | 0.40727300 |
| 0.42216300 | 0.42507400 | 0.42534100 | 0.42273000 | 0.41769700 | 0.41131100 | 0.40485400 | 0.39954800 | 0.39638900 | 0.39586800 | 0.39776000 | 0.40121200 | 0.40504000 | 0.40797500 |
| 0.41788500 | 0.42039700 | 0.42067500 | 0.41851100 | 0.41420300 | 0.40853600 | 0.40265400 | 0.39783100 | 0.39500500 | 0.39447800 | 0.39603000 | 0.39907100 | 0.40261500 | 0.40539200 |
| 0.43583600 | 0.43874300 | 0.43896000 | 0.43645500 | 0.43159900 | 0.42521300 | 0.41859700 | 0.41316900 | 0.40995800 | 0.40933700 | 0.41110300 | 0.41455800 | 0.41849500 | 0.42147500 |
| 0.30053300 | 0.30262100 | 0.30291900 | 0.30110500 | 0.29741600 | 0.29269000 | 0.28794000 | 0.28404100 | 0.28170200 | 0.28132800 | 0.28279700 | 0.28551900 | 0.28860300 | 0.29100500 |
| 0.43010700 | 0.43284800 | 0.43312700 | 0.43066200 | 0.42581100 | 0.41949600 | 0.41298000 | 0.40765400 | 0.40453400 | 0.40390300 | 0.40553400 | 0.40887400 | 0.41287800 | 0.41608400 |
| 0.43863500 | 0.44195700 | 0.44269400 | 0.44037600 | 0.43534400 | 0.42866300 | 0.42181200 | 0.41621600 | 0.41290700 | 0.41235200 | 0.41431500 | 0.41794600 | 0.42199800 | 0.42503400 |
| 0.36680400 | 0.36933400 | 0.36977000 | 0.36781700 | 0.36365000 | 0.35806700 | 0.35228200 | 0.34753500 | 0.34473400 | 0.34423000 | 0.34578100 | 0.34871200 | 0.35208100 | 0.35475000 |
| 0.42690200 | 0.42991100 | 0.43025300 | 0.42769400 | 0.42265900 | 0.41612100 | 0.40937800 | 0.40377000 | 0.40034900 | 0.39962900 | 0.40143600 | 0.40494300 | 0.40887700 | 0.41185700 |
| 0.39724100 | 0.39993100 | 0.40021400 | 0.39788500 | 0.39323300 | 0.38717800 | 0.38097600 | 0.37582800 | 0.37273500 | 0.37221300 | 0.37396900 | 0.37713600 | 0.38067100 | 0.38343600 |
| 0.43715100 | 0.43999800 | 0.44035400 | 0.43788400 | 0.43285200 | 0.42627200 | 0.41949700 | 0.41385100 | 0.41039100 | 0.40962100 | 0.41137400 | 0.41491300 | 0.41899200 | 0.42209500 |
| 0.42678800 | 0.42984600 | 0.43035000 | 0.42788500 | 0.42273800 | 0.41603700 | 0.40932400 | 0.40396900 | 0.40084300 | 0.40026300 | 0.40204900 | 0.40555600 | 0.40966300 | 0.41291200 |
| 0.38939500 | 0.39231100 | 0.39265900 | 0.39025200 | 0.38547900 | 0.37934700 | 0.37319400 | 0.36819600 | 0.36517000 | 0.36454400 | 0.36619600 | 0.36946600 | 0.37331900 | 0.37645000 |
| 0.23486700 | 0.23658900 | 0.23683500 | 0.23550700 | 0.23279900 | 0.22920500 | 0.22546000 | 0.22238000 | 0.22060100 | 0.22036000 | 0.22146100 | 0.22340200 | 0.22557500 | 0.22733700 |
| 0.25544100 | 0.25727200 | 0.25749300 | 0.25598100 | 0.25299600 | 0.24910100 | 0.24510800 | 0.24188200 | 0.24005900 | 0.23986700 | 0.24109500 | 0.24323700 | 0.24563800 | 0.24755100 |
| 0.31655900 | 0.31875200 | 0.31884400 | 0.31679600 | 0.31293500 | 0.30789700 | 0.30265500 | 0.29836400 | 0.29590200 | 0.29554500 | 0.29706200 | 0.29987900 | 0.30308400 | 0.30553400 |

| 4375       | 4377       | 4379       | 4381       | 4383       | 4385       | 4387       | 4389       | 4391       | 4393       | 4394       | 4396       | 4398       | 4400       |
|------------|------------|------------|------------|------------|------------|------------|------------|------------|------------|------------|------------|------------|------------|
| 0.40831100 | 0.40731000 | 0.40458400 | 0.40084300 | 0.39686100 | 0.39323600 | 0.39039000 | 0.38859900 | 0.38762000 | 0.38618800 | 0.38243900 | 0.37549800 | 0.36662100 | 0.35842900 |
| 0.40902500 | 0.40791000 | 0.40503200 | 0.40108000 | 0.39676400 | 0.39271100 | 0.38945000 | 0.38732800 | 0.38609000 | 0.38440800 | 0.38033600 | 0.37294100 | 0.36348600 | 0.35471900 |
| 0.40636300 | 0.40526200 | 0.40257000 | 0.39904300 | 0.39532700 | 0.39186200 | 0.38898900 | 0.38696700 | 0.38565500 | 0.38401000 | 0.38027400 | 0.37349800 | 0.36489400 | 0.35704400 |
| 0.42246500 | 0.42124800 | 0.41827900 | 0.41432800 | 0.41017600 | 0.40639700 | 0.40334800 | 0.40126700 | 0.39998700 | 0.39834500 | 0.39441100 | 0.38711300 | 0.37768300 | 0.36893400 |
| 0.29188000 | 0.29099300 | 0.28873600 | 0.28576200 | 0.28260900 | 0.27965700 | 0.27725900 | 0.27567500 | 0.27468900 | 0.27333000 | 0.27026600 | 0.26487600 | 0.25805100 | 0.25174700 |
| 0.41724700 | 0.41603000 | 0.41307000 | 0.40929800 | 0.40530100 | 0.40142600 | 0.39816600 | 0.39599400 | 0.39469100 | 0.39289800 | 0.38873700 | 0.38139900 | 0.37215300 | 0.36358900 |
| 0.42595200 | 0.42455400 | 0.42142900 | 0.41741000 | 0.41318700 | 0.40921700 | 0.40589800 | 0.40359700 | 0.40217700 | 0.40043300 | 0.39638500 | 0.38890300 | 0.37919700 | 0.37018100 |
| 0.35573000 | 0.35475900 | 0.35233500 | 0.34910600 | 0.34554100 | 0.34209100 | 0.33925600 | 0.33737100 | 0.33624600 | 0.33481900 | 0.33142800 | 0.32513200 | 0.31696500 | 0.30938300 |
| 0.41286800 | 0.41163900 | 0.40862400 | 0.40462100 | 0.40037900 | 0.39645400 | 0.39330000 | 0.39122100 | 0.38995500 | 0.38822400 | 0.38410000 | 0.37656200 | 0.36685900 | 0.35785600 |
| 0.38447500 | 0.38347500 | 0.38080300 | 0.37714100 | 0.37314800 | 0.36935300 | 0.36625900 | 0.36424900 | 0.36306100 | 0.36141100 | 0.35751800 | 0.35052300 | 0.34161300 | 0.33341800 |
| 0.42308600 | 0.42177900 | 0.41877100 | 0.41480400 | 0.41050100 | 0.40646100 | 0.40316600 | 0.40090500 | 0.39959300 | 0.39810600 | 0.39433200 | 0.38700000 | 0.37732600 | 0.36828000 |
| 0.41408900 | 0.41288000 | 0.40986300 | 0.40586900 | 0.40152500 | 0.39734700 | 0.39392800 | 0.39170500 | 0.39041600 | 0.38871100 | 0.38463900 | 0.37721900 | 0.36767500 | 0.35877100 |
| 0.37767200 | 0.37656200 | 0.37362800 | 0.36979200 | 0.36577200 | 0.36197400 | 0.35879900 | 0.35663900 | 0.35531200 | 0.35361100 | 0.34975300 | 0.34283500 | 0.33397600 | 0.32574800 |
| 0.22805500 | 0.22738000 | 0.22557100 | 0.22329400 | 0.22103000 | 0.21890100 | 0.21705900 | 0.21579600 | 0.21509500 | 0.21422700 | 0.21202300 | 0.20787100 | 0.20250100 | 0.19755300 |
| 0.24832800 | 0.24771600 | 0.24595900 | 0.24356100 | 0.24097300 | 0.23851700 | 0.23648100 | 0.23508100 | 0.23414700 | 0.23290200 | 0.23027000 | 0.22574000 | 0.22002200 | 0.21470700 |
| 0.30635000 | 0.30536500 | 0.30303800 | 0.30003200 | 0.29684700 | 0.29380400 | 0.29124500 | 0.28945500 | 0.28829200 | 0.28679600 | 0.28348700 | 0.27768100 | 0.27047200 | 0.26396600 |

| 4402       | 4404       | 4406       | 4408       | 4410       | 4412       | 4414       | 4416       | 4418       | 4420       | 4421       | 4423       | 4425       | 4427       |
|------------|------------|------------|------------|------------|------------|------------|------------|------------|------------|------------|------------|------------|------------|
| 0.35319900 | 0.35193700 | 0.35437100 | 0.35913900 | 0.36401800 | 0.36674900 | 0.36628700 | 0.36333600 | 0.35972300 | 0.35722300 | 0.35654900 | 0.35706300 | 0.35743100 | 0.35670000 |
| 0.34911200 | 0.34779200 | 0.35047100 | 0.35563200 | 0.36087600 | 0.36381200 | 0.36327900 | 0.36003700 | 0.35614200 | 0.35351400 | 0.35286600 | 0.35346800 | 0.35383200 | 0.35298000 |
| 0.35207800 | 0.35090200 | 0.35329800 | 0.35795900 | 0.36268600 | 0.36530600 | 0.36480600 | 0.36180400 | 0.35811700 | 0.35561000 | 0.35504200 | 0.35571400 | 0.35618800 | 0.35553800 |
| 0.36332800 | 0.36197500 | 0.36463100 | 0.36978800 | 0.37498500 | 0.37780900 | 0.37715700 | 0.37379100 | 0.36974100 | 0.36699600 | 0.36637600 | 0.36718700 | 0.36784800 | 0.36717100 |
| 0.24774200 | 0.24683000 | 0.24875600 | 0.25237700 | 0.25594600 | 0.25780600 | 0.25726000 | 0.25491800 | 0.25219200 | 0.25037600 | 0.24995400 | 0.25044200 | 0.25078100 | 0.25015900 |
| 0.35808400 | 0.35685100 | 0.35962000 | 0.36470600 | 0.36966400 | 0.37233700 | 0.37177400 | 0.36862000 | 0.36471200 | 0.36197900 | 0.36128000 | 0.36200300 | 0.36264000 | 0.36202500 |
| 0.36441700 | 0.36301200 | 0.36566300 | 0.37084000 | 0.37612600 | 0.37911400 | 0.37862200 | 0.37533600 | 0.37126400 | 0.36843800 | 0.36774800 | 0.36850500 | 0.36911600 | 0.36843200 |
| 0.30452400 | 0.30330400 | 0.30551300 | 0.30992100 | 0.31443500 | 0.31693300 | 0.31645700 | 0.31368400 | 0.31030700 | 0.30796500 | 0.30738700 | 0.30801200 | 0.30846400 | 0.30779700 |
| 0.35210900 | 0.35073500 | 0.35343400 | 0.35869300 | 0.36403200 | 0.36693100 | 0.36625800 | 0.36289200 | 0.35894200 | 0.35634200 | 0.35575400 | 0.35636000 | 0.35672100 | 0.35593700 |
| 0.32826100 | 0.32711100 | 0.32961400 | 0.33432000 | 0.33902000 | 0.34159700 | 0.34106200 | 0.33805900 | 0.33439700 | 0.33187000 | 0.33122500 | 0.33182400 | 0.33224500 | 0.33152600 |
| 0.36250800 | 0.36111500 | 0.36372200 | 0.36882200 | 0.37404900 | 0.37696900 | 0.37642700 | 0.37318200 | 0.36919400 | 0.36638600 | 0.36561200 | 0.36619000 | 0.36657300 | 0.36576800 |
| 0.35304000 | 0.35167200 | 0.35436600 | 0.35952100 | 0.36466300 | 0.36740600 | 0.36670900 | 0.36340200 | 0.35945700 | 0.35672400 | 0.35592200 | 0.35636600 | 0.35667500 | 0.35594000 |
| 0.32053000 | 0.31941200 | 0.32198700 | 0.32663500 | 0.33115500 | 0.33357400 | 0.33296700 | 0.32995800 | 0.32631400 | 0.32382300 | 0.32323900 | 0.32391400 | 0.32442200 | 0.32373500 |
| 0.19442600 | 0.19368500 | 0.19514800 | 0.19798800 | 0.20087600 | 0.20249200 | 0.20220700 | 0.20041400 | 0.19818600 | 0.19658500 | 0.19613100 | 0.19655800 | 0.19698200 | 0.19665800 |
| 0.21129400 | 0.21050700 | 0.21215500 | 0.21526400 | 0.21832700 | 0.21987300 | 0.21933100 | 0.21734100 | 0.21510400 | 0.21357200 | 0.21313100 | 0.21347200 | 0.21376200 | 0.21333300 |
| 0.25987300 | 0.25890900 | 0.26085300 | 0.26462400 | 0.26845300 | 0.27051600 | 0.26995500 | 0.26739100 | 0.26437600 | 0.26239700 | 0.26205700 | 0.26269300 | 0.26296700 | 0.26212500 |



| 4429       | 4431       | 4433       | 4435       | 4437       | 4439       | 4441       | 4443       | 4445       | 4447       | 4448       | 4450       | 4452       | 4454       |
|------------|------------|------------|------------|------------|------------|------------|------------|------------|------------|------------|------------|------------|------------|
| 0.35487500 | 0.35248700 | 0.34970500 | 0.34611000 | 0.34135800 | 0.33588300 | 0.33086500 | 0.32744600 | 0.32587500 | 0.32545000 | 0.32522200 | 0.32446100 | 0.32254000 | 0.31911400 |
| 0.35104700 | 0.34862100 | 0.34582500 | 0.34218100 | 0.33729500 | 0.33159400 | 0.32627600 | 0.32251600 | 0.32067800 | 0.32010100 | 0.31969700 | 0.31864900 | 0.31645700 | 0.31288400 |
| 0.35388900 | 0.35171900 | 0.34905200 | 0.34550100 | 0.34083200 | 0.33549900 | 0.33060900 | 0.32718500 | 0.32549300 | 0.32497800 | 0.32469800 | 0.32380500 | 0.32176100 | 0.31841400 |
| 0.36515000 | 0.36247000 | 0.35946600 | 0.35572300 | 0.35072100 | 0.34480200 | 0.33926600 | 0.33542600 | 0.33370000 | 0.33343200 | 0.33339300 | 0.33252600 | 0.33032200 | 0.32674800 |
| 0.24860200 | 0.24666200 | 0.24456100 | 0.24190100 | 0.23830500 | 0.23412300 | 0.23032100 | 0.22774600 | 0.22655900 | 0.22626100 | 0.22612600 | 0.22553800 | 0.22407700 | 0.22159100 |
| 0.36015900 | 0.35768500 | 0.35476900 | 0.35091600 | 0.34578700 | 0.33994200 | 0.33466100 | 0.33104600 | 0.32931800 | 0.32882700 | 0.32857000 | 0.32762900 | 0.32541200 | 0.32184800 |
| 0.36648300 | 0.36389700 | 0.36085600 | 0.35687000 | 0.35155900 | 0.34545900 | 0.33988900 | 0.33602700 | 0.33417100 | 0.33372600 | 0.33367000 | 0.33297800 | 0.33087600 | 0.32712100 |
| 0.30615700 | 0.30409400 | 0.30168000 | 0.29846500 | 0.29411400 | 0.28905500 | 0.28439800 | 0.28117700 | 0.27969400 | 0.27938900 | 0.27927600 | 0.27855600 | 0.27675500 | 0.27370000 |
| 0.35405300 | 0.35154600 | 0.34852600 | 0.34450700 | 0.33913800 | 0.33302700 | 0.32753400 | 0.32377600 | 0.32196500 | 0.32144500 | 0.32118200 | 0.32028600 | 0.31815600 | 0.31456100 |
| 0.32978800 | 0.32751200 | 0.32468900 | 0.32094200 | 0.31616700 | 0.31084000 | 0.30591200 | 0.30239000 | 0.30068700 | 0.30027100 | 0.30009800 | 0.29927200 | 0.29724900 | 0.29385900 |
| 0.36391300 | 0.36148500 | 0.35845600 | 0.35435800 | 0.34898300 | 0.34296500 | 0.33761400 | 0.33407200 | 0.33254600 | 0.33223100 | 0.33197100 | 0.33092900 | 0.32865600 | 0.32496300 |
| 0.35419400 | 0.35185600 | 0.34897200 | 0.34507500 | 0.33979800 | 0.33367700 | 0.32811800 | 0.32437600 | 0.32265000 | 0.32215900 | 0.32186600 | 0.32093300 | 0.31875800 | 0.31512300 |
| 0.32188500 | 0.31948400 | 0.31674400 | 0.31321800 | 0.30854400 | 0.30317400 | 0.29822700 | 0.29475900 | 0.29308600 | 0.29262300 | 0.29237600 | 0.29151700 | 0.28950700 | 0.28616000 |
| 0.19558700 | 0.19418900 | 0.19259700 | 0.19053100 | 0.18776000 | 0.18455800 | 0.18163900 | 0.17967400 | 0.17885400 | 0.17881600 | 0.17889700 | 0.17847800 | 0.17721300 | 0.17509900 |
| 0.21217600 | 0.21064200 | 0.20887500 | 0.20666500 | 0.20376800 | 0.20036900 | 0.19715000 | 0.19487400 | 0.19384000 | 0.19368800 | 0.19370300 | 0.19324400 | 0.19192700 | 0.18969400 |
| 0.26047100 | 0.25856100 | 0.25638500 | 0.25348400 | 0.24962800 | 0.24522600 | 0.24117900 | 0.23835100 | 0.23701000 | 0.23672600 | 0.23670500 | 0.23613800 | 0.23447200 | 0.23164700 |

| 4456       | 4458       | 4460       | 4462       | 4464       | 4466       | 4468       | 4470       | 4472       | 4474       | 4475       | 4477       | 4479       | 4481       |
|------------|------------|------------|------------|------------|------------|------------|------------|------------|------------|------------|------------|------------|------------|
| 0.31452800 | 0.30946300 | 0.30430100 | 0.29924700 | 0.29472100 | 0.29122600 | 0.28895700 | 0.28767500 | 0.28691600 | 0.28627000 | 0.28554300 | 0.28470400 | 0.28378400 | 0.28282000 |
| 0.30814800 | 0.30273100 | 0.29704700 | 0.29152500 | 0.28672800 | 0.28311700 | 0.28075300 | 0.27937800 | 0.27863300 | 0.27811600 | 0.27748300 | 0.27663600 | 0.27562900 | 0.27451900 |
| 0.31405800 | 0.30918600 | 0.30413400 | 0.29919900 | 0.29487000 | 0.29157200 | 0.28937600 | 0.28805500 | 0.28724700 | 0.28659600 | 0.28590100 | 0.28513200 | 0.28430200 | 0.28339500 |
| 0.32210500 | 0.31682000 | 0.31126100 | 0.30583800 | 0.30106600 | 0.29736500 | 0.29487700 | 0.29343200 | 0.29263600 | 0.29205500 | 0.29140100 | 0.29057200 | 0.28956000 | 0.28840400 |
| 0.21826500 | 0.21446800 | 0.21052800 | 0.20673800 | 0.20341000 | 0.20077700 | 0.19893000 | 0.19778900 | 0.19711200 | 0.19664800 | 0.19623200 | 0.19573900 | 0.19509400 | 0.19433300 |
| 0.31730100 | 0.31216700 | 0.30674400 | 0.30142800 | 0.29670700 | 0.29299200 | 0.29050400 | 0.28910700 | 0.28828400 | 0.28752700 | 0.28665000 | 0.28569400 | 0.28469700 | 0.28365700 |
| 0.32215100 | 0.31663100 | 0.31094400 | 0.30537100 | 0.30041600 | 0.29659400 | 0.29408400 | 0.29263200 | 0.29176500 | 0.29106400 | 0.29027100 | 0.28928300 | 0.28814700 | 0.28699200 |
| 0.26965200 | 0.26509200 | 0.26036000 | 0.25577500 | 0.25177400 | 0.24868700 | 0.24659400 | 0.24537000 | 0.24470300 | 0.24420200 | 0.24359800 | 0.24281200 | 0.24189300 | 0.24095100 |
| 0.30980600 | 0.30442800 | 0.29877800 | 0.29321700 | 0.28834000 | 0.28466000 | 0.28226800 | 0.28087400 | 0.28004200 | 0.27939800 | 0.27872700 | 0.27793300 | 0.27694800 | 0.27578700 |
| 0.28939600 | 0.28437200 | 0.27915200 | 0.27405000 | 0.26954600 | 0.26608000 | 0.26375800 | 0.26236000 | 0.26151600 | 0.26086600 | 0.26017100 | 0.25936600 | 0.25847600 | 0.25749900 |
| 0.32010900 | 0.31469300 | 0.30915600 | 0.30375900 | 0.29894000 | 0.29522200 | 0.29279900 | 0.29142700 | 0.29068300 | 0.29016800 | 0.28952100 | 0.28855600 | 0.28740300 | 0.28631600 |
| 0.31035500 | 0.30495600 | 0.29922000 | 0.29352800 | 0.28853000 | 0.28473000 | 0.28222700 | 0.28079500 | 0.27997400 | 0.27932100 | 0.27858600 | 0.27767800 | 0.27664500 | 0.27561000 |
| 0.28178100 | 0.27688500 | 0.27181800 | 0.26685500 | 0.26239900 | 0.25889100 | 0.25651000 | 0.25503500 | 0.25411300 | 0.25346900 | 0.25282000 | 0.25194700 | 0.25089500 | 0.24983100 |
| 0.17239000 | 0.16939300 | 0.16632600 | 0.16338400 | 0.16081000 | 0.15881100 | 0.15745600 | 0.15664900 | 0.15616800 | 0.15580700 | 0.15546400 | 0.15507500 | 0.15459400 | 0.15405200 |
| 0.18681000 | 0.18360900 | 0.18027800 | 0.17698900 | 0.17407900 | 0.17187900 | 0.17044300 | 0.16959200 | 0.16912300 | 0.16883500 | 0.16850600 | 0.16803400 | 0.16749300 | 0.16694900 |
| 0.22803300 | 0.22403400 | 0.21988000 | 0.21582300 | 0.21222600 | 0.20941100 | 0.20754200 | 0.20650500 | 0.20591100 | 0.20539700 | 0.20482100 | 0.20416400 | 0.20341100 | 0.20257100 |

| 4483       | 4485       | 4487       | 4489       | 4491       | 4493       | 4495       | 4497       | 4499       | 4501       | 4502       | 4504       | 4506       | 4508       |
|------------|------------|------------|------------|------------|------------|------------|------------|------------|------------|------------|------------|------------|------------|
| 0.28185300 | 0.28098500 | 0.28040000 | 0.28029300 | 0.28086700 | 0.28228500 | 0.28451800 | 0.28740800 | 0.29084200 | 0.29475600 | 0.29897500 | 0.30309700 | 0.30653000 | 0.30875400 |
| 0.27340100 | 0.27245600 | 0.27188100 | 0.27182700 | 0.27239400 | 0.27365600 | 0.27570700 | 0.27865100 | 0.28243400 | 0.28676100 | 0.29125300 | 0.29552500 | 0.29907300 | 0.30136200 |
| 0.28243600 | 0.28155100 | 0.28092700 | 0.28075700 | 0.28123300 | 0.28249800 | 0.28456800 | 0.28734600 | 0.29075800 | 0.29473500 | 0.29902900 | 0.30315600 | 0.30652000 | 0.30862400 |
| 0.28723400 | 0.28630500 | 0.28583700 | 0.28586500 | 0.28641200 | 0.28771400 | 0.28999100 | 0.29312100 | 0.29682600 | 0.30099600 | 0.30549300 | 0.30985300 | 0.31345000 | 0.31579100 |
| 0.19356800 | 0.19292700 | 0.19255600 | 0.19256700 | 0.19298500 | 0.19383100 | 0.19521400 | 0.19723100 | 0.19983000 | 0.20281700 | 0.20595200 | 0.20897900 | 0.21158600 | 0.21341500 |
| 0.28261200 | 0.28170900 | 0.28114100 | 0.28109000 | 0.28172400 | 0.28312900 | 0.28532700 | 0.28833300 | 0.29204700 | 0.29623800 | 0.30065700 | 0.30495000 | 0.30855800 | 0.31091200 |
| 0.28592900 | 0.28505500 | 0.28449400 | 0.28441100 | 0.28500600 | 0.28642000 | 0.28864500 | 0.29163300 | 0.29536100 | 0.29970700 | 0.30436100 | 0.30882000 | 0.31244100 | 0.31473600 |
| 0.24011700 | 0.23950100 | 0.23918700 | 0.23926000 | 0.23983000 | 0.24095500 | 0.24265900 | 0.24505000 | 0.24818200 | 0.25184200 | 0.25570100 | 0.25942100 | 0.26253000 | 0.26455700 |
| 0.27461500 | 0.27363500 | 0.27301100 | 0.27290000 | 0.27345000 | 0.27481900 | 0.27711100 | 0.28024500 | 0.28401500 | 0.28824600 | 0.29275900 | 0.29716300 | 0.30083700 | 0.30321700 |
| 0.25649600 | 0.25568900 | 0.25529600 | 0.25536300 | 0.25590700 | 0.25705300 | 0.25894700 | 0.26165600 | 0.26514500 | 0.26919900 | 0.27346200 | 0.27752900 | 0.28089500 | 0.28304700 |
| 0.28536900 | 0.28453900 | 0.28394900 | 0.28386000 | 0.28447900 | 0.28587800 | 0.28806700 | 0.29105200 | 0.29476100 | 0.29897500 | 0.30341400 | 0.30775100 | 0.31146700 | 0.31393800 |
| 0.27463000 | 0.27373700 | 0.27307800 | 0.27292400 | 0.27354400 | 0.27503700 | 0.27732400 | 0.28030300 | 0.28392700 | 0.28815700 | 0.29278800 | 0.29731700 | 0.30104000 | 0.30339300 |
| 0.24887400 | 0.24817300 | 0.24786100 | 0.24795400 | 0.24848700 | 0.24964400 | 0.25159200 | 0.25433700 | 0.25774300 | 0.26162700 | 0.26580100 | 0.26991500 | 0.27337000 | 0.27559700 |
| 0.15354700 | 0.15319500 | 0.15307600 | 0.15319000 | 0.15352700 | 0.15419600 | 0.15535700 | 0.15703000 | 0.15907300 | 0.16136300 | 0.16383700 | 0.16630500 | 0.16836900 | 0.16968100 |
| 0.16639800 | 0.16588800 | 0.16553300 | 0.16545500 | 0.16578900 | 0.16662600 | 0.16795800 | 0.16973700 | 0.17194300 | 0.17451100 | 0.17725300 | 0.17986900 | 0.18203500 | 0.18347600 |
| 0.20173600 | 0.20105900 | 0.20065900 | 0.20062700 | 0.20107900 | 0.20213800 | 0.20385000 | 0.20613000 | 0.20883800 | 0.21191000 | 0.21525200 | 0.21852600 | 0.22124300 | 0.22303200 |

| 4510       | 4512       | 4514       | 4516       | 4518       | 4520       | 4522       | 4524       | 4526       | 4527       | 4529       | 4531       | 4533       | 4535       |
|------------|------------|------------|------------|------------|------------|------------|------------|------------|------------|------------|------------|------------|------------|
| 0.30960900 | 0.30932600 | 0.30837200 | 0.30723400 | 0.30618600 | 0.30522700 | 0.30432500 | 0.30361700 | 0.30327400 | 0.30328000 | 0.30339000 | 0.30332500 | 0.30306900 | 0.30292500 |
| 0.30220000 | 0.30188600 | 0.30093900 | 0.29979000 | 0.29868900 | 0.29770900 | 0.29682100 | 0.29608200 | 0.29568100 | 0.29567700 | 0.29579700 | 0.29573500 | 0.29550200 | 0.29535300 |
| 0.30935100 | 0.30905300 | 0.30822200 | 0.30719400 | 0.30614400 | 0.30511000 | 0.30413900 | 0.30343400 | 0.30318000 | 0.30330400 | 0.30349600 | 0.30342300 | 0.30306100 | 0.30275100 |
| 0.31667700 | 0.31636100 | 0.31542100 | 0.31434100 | 0.31326900 | 0.31217300 | 0.31113000 | 0.31039700 | 0.31016900 | 0.31028900 | 0.31036100 | 0.31016700 | 0.30987200 | 0.30975200 |
| 0.21422500 | 0.21410200 | 0.21343500 | 0.21263500 | 0.21190100 | 0.21124200 | 0.21062300 | 0.21009700 | 0.20979100 | 0.20970100 | 0.20964100 | 0.20944800 | 0.20913500 | 0.20885300 |
| 0.31177800 | 0.31142200 | 0.31040000 | 0.30923200 | 0.30819200 | 0.30726400 | 0.30635000 | 0.30555700 | 0.30514300 | 0.30514100 | 0.30524500 | 0.30516800 | 0.30496400 | 0.30487500 |
| 0.31565700 | 0.31547300 | 0.31456700 | 0.31335100 | 0.31213700 | 0.31104700 | 0.31012400 | 0.30948000 | 0.30928100 | 0.30947000 | 0.30964600 | 0.30946600 | 0.30902000 | 0.30871700 |
| 0.26533900 | 0.26504500 | 0.26410400 | 0.26306400 | 0.26222600 | 0.26150900 | 0.26079000 | 0.26018000 | 0.25988600 | 0.25989900 | 0.25994800 | 0.25979800 | 0.25949700 | 0.25927100 |
| 0.30411100 | 0.30378100 | 0.30274900 | 0.30152200 | 0.30043100 | 0.29952100 | 0.29870300 | 0.29805900 | 0.29774600 | 0.29770000 | 0.29768900 | 0.29756500 | 0.29736600 | 0.29727900 |
| 0.28383500 | 0.28359300 | 0.28281800 | 0.28187600 | 0.28091400 | 0.27994300 | 0.27904600 | 0.27840900 | 0.27811200 | 0.27808900 | 0.27817200 | 0.27809600 | 0.27777100 | 0.27749200 |
| 0.31487900 | 0.31456400 | 0.31356600 | 0.31240100 | 0.31134600 | 0.31042100 | 0.30955600 | 0.30884000 | 0.30850600 | 0.30856200 | 0.30865900 | 0.30852000 | 0.30825300 | 0.30811800 |
| 0.30425900 | 0.30396400 | 0.30299900 | 0.30178700 | 0.30057500 | 0.29945100 | 0.29850100 | 0.29786900 | 0.29763500 | 0.29768600 | 0.29774000 | 0.29756800 | 0.29726500 | 0.29717700 |
| 0.27642500 | 0.27616300 | 0.27533400 | 0.27436900 | 0.27344500 | 0.27254200 | 0.27166100 | 0.27095900 | 0.27061200 | 0.27059400 | 0.27063400 | 0.27047900 | 0.27016000 | 0.26993700 |
| 0.17018600 | 0.17006800 | 0.16955800 | 0.16885300 | 0.16812300 | 0.16745500 | 0.16689300 | 0.16650500 | 0.16632000 | 0.16627800 | 0.16625000 | 0.16609100 | 0.16577700 | 0.16547700 |
| 0.18406400 | 0.18393100 | 0.18338400 | 0.18269200 | 0.18201600 | 0.18140600 | 0.18084900 | 0.18040000 | 0.18016300 | 0.18010800 | 0.18008200 | 0.17997200 | 0.17977400 | 0.17959000 |
| 0.22380300 | 0.22375400 | 0.22317500 | 0.22232600 | 0.22145400 | 0.22067200 | 0.21994900 | 0.21935600 | 0.21908300 | 0.21912500 | 0.21919300 | 0.21898000 | 0.21851500 | 0.21814200 |

| 4537       | 4539       | 4541       | 4543       | 4545       | 4547       | 4549       | 4551       | 4553       | 4554       | 4556       | 4558       | 4560       | 4562       |
|------------|------------|------------|------------|------------|------------|------------|------------|------------|------------|------------|------------|------------|------------|
| 0.30309000 | 0.30325200 | 0.30280000 | 0.30151000 | 0.29989600 | 0.29876100 | 0.29849600 | 0.29887100 | 0.29932700 | 0.29942400 | 0.29915000 | 0.29880700 | 0.29868700 | 0.29889900 |
| 0.29546700 | 0.29562900 | 0.29524800 | 0.29396600 | 0.29222100 | 0.29091500 | 0.29060900 | 0.29113700 | 0.29182000 | 0.29204300 | 0.29170100 | 0.29114200 | 0.29084300 | 0.29103300 |
| 0.30276100 | 0.30289200 | 0.30261500 | 0.30160700 | 0.30015200 | 0.29897600 | 0.29863100 | 0.29903100 | 0.29956500 | 0.29964600 | 0.29919600 | 0.29863500 | 0.29841700 | 0.29863700 |
| 0.30985600 | 0.30989900 | 0.30943800 | 0.30828000 | 0.30678600 | 0.30564300 | 0.30531200 | 0.30567800 | 0.30620700 | 0.30641100 | 0.30620700 | 0.30588000 | 0.30577400 | 0.30599200 |
| 0.20874600 | 0.20871400 | 0.20841100 | 0.20763300 | 0.20663900 | 0.20593500 | 0.20579600 | 0.20606100 | 0.20632600 | 0.20629800 | 0.20598600 | 0.20562000 | 0.20548900 | 0.20572200 |
| 0.30500900 | 0.30514900 | 0.30477200 | 0.30356200 | 0.30190700 | 0.30061100 | 0.30020900 | 0.30063500 | 0.30129900 | 0.30155200 | 0.30122700 | 0.30068800 | 0.30041700 | 0.30064400 |
| 0.30881100 | 0.30899500 | 0.30856300 | 0.30723700 | 0.30557800 | 0.30444900 | 0.30428400 | 0.30484000 | 0.30544100 | 0.30552800 | 0.30507900 | 0.30452800 | 0.30431700 | 0.30455300 |
| 0.25927700 | 0.25932300 | 0.25889100 | 0.25775300 | 0.25636100 | 0.25538700 | 0.25515300 | 0.25551700 | 0.25601300 | 0.25617600 | 0.25589000 | 0.25539600 | 0.25506200 | 0.25512300 |
| 0.29744900 | 0.29766400 | 0.29733700 | 0.29611300 | 0.29440200 | 0.29307000 | 0.29266700 | 0.29305800 | 0.29362900 | 0.29379700 | 0.29349000 | 0.29312000 | 0.29307400 | 0.29338200 |
| 0.27753500 | 0.27765100 | 0.27724900 | 0.27608300 | 0.27457600 | 0.27345600 | 0.27317100 | 0.27359600 | 0.27414400 | 0.27425400 | 0.27388600 | 0.27344600 | 0.27331900 | 0.27358500 |
| 0.30819200 | 0.30824600 | 0.30783500 | 0.30671700 | 0.30520300 | 0.30395900 | 0.30352800 | 0.30391300 | 0.30454000 | 0.30478100 | 0.30447400 | 0.30395600 | 0.30373400 | 0.30402100 |
| 0.29745700 | 0.29775700 | 0.29744700 | 0.29623700 | 0.29456700 | 0.29327400 | 0.29290000 | 0.29334500 | 0.29398700 | 0.29415500 | 0.29368900 | 0.29305200 | 0.29285400 | 0.29325600 |
| 0.26999500 | 0.27012100 | 0.26977200 | 0.26867000 | 0.26717900 | 0.26599800 | 0.26562000 | 0.26600700 | 0.26664400 | 0.26693900 | 0.26669000 | 0.26621800 | 0.26598100 | 0.26612500 |
| 0.16537100 | 0.16538000 | 0.16517900 | 0.16456000 | 0.16369000 | 0.16297900 | 0.16273400 | 0.16291000 | 0.16315100 | 0.16314100 | 0.16288000 | 0.16257200 | 0.16240300 | 0.16242100 |
| 0.17952100 | 0.17945700 | 0.17909600 | 0.17832900 | 0.17744700 | 0.17683700 | 0.17666800 | 0.17684700 | 0.17707800 | 0.17707000 | 0.17679000 | 0.17645400 | 0.17627900 | 0.17631800 |
| 0.21808000 | 0.21814600 | 0.21793400 | 0.21719800 | 0.21613200 | 0.21526700 | 0.21500200 | 0.21526800 | 0.21561700 | 0.21566300 | 0.21539000 | 0.21507100 | 0.21499700 | 0.21524700 |

| 4564       | 4566       | 4568       | 4570       | 4572       | 4574       | 4576       | 4578       | 4580       | 4581       | 4583       | 4585       | 4587       | 4589       |
|------------|------------|------------|------------|------------|------------|------------|------------|------------|------------|------------|------------|------------|------------|
| 0.29936400 | 0.30002800 | 0.30108600 | 0.30299200 | 0.30626600 | 0.31112900 | 0.31716700 | 0.32331500 | 0.32829100 | 0.33133000 | 0.33247300 | 0.33206300 | 0.33034900 | 0.32775300 |
| 0.29155300 | 0.29223200 | 0.29332500 | 0.29542800 | 0.29905100 | 0.30430800 | 0.31079500 | 0.31748500 | 0.32297100 | 0.32629600 | 0.32741300 | 0.32675500 | 0.32474600 | 0.32187900 |
| 0.29909900 | 0.29970500 | 0.30074600 | 0.30275700 | 0.30614600 | 0.31096900 | 0.31685900 | 0.32293600 | 0.32794800 | 0.33095800 | 0.33191300 | 0.33132200 | 0.32960200 | 0.32711200 |
| 0.30640100 | 0.30695800 | 0.30798400 | 0.31003600 | 0.31359900 | 0.31883300 | 0.32533300 | 0.33199000 | 0.33741100 | 0.34069800 | 0.34179300 | 0.34114200 | 0.33923200 | 0.33655200 |
| 0.20616200 | 0.20669000 | 0.20753000 | 0.20906200 | 0.21156100 | 0.21509200 | 0.21939600 | 0.22383400 | 0.22756300 | 0.22994700 | 0.23087800 | 0.23060700 | 0.22939300 | 0.22750300 |
| 0.30127500 | 0.30212500 | 0.30328100 | 0.30524900 | 0.30862800 | 0.31366500 | 0.32000000 | 0.32660000 | 0.33208100 | 0.33548300 | 0.33674100 | 0.33626100 | 0.33442400 | 0.33172800 |
| 0.30508400 | 0.30583600 | 0.30704700 | 0.30921300 | 0.31284600 | 0.31815300 | 0.32475100 | 0.33159700 | 0.33732900 | 0.34094300 | 0.34226600 | 0.34169500 | 0.33970000 | 0.33684300 |
| 0.25553100 | 0.25613400 | 0.25706800 | 0.25883100 | 0.26190500 | 0.26636500 | 0.27177800 | 0.27730000 | 0.28191500 | 0.28486500 | 0.28598300 | 0.28552900 | 0.28386500 | 0.28146000 |
| 0.29390900 | 0.29467900 | 0.29592700 | 0.29806400 | 0.30159600 | 0.30679200 | 0.31327900 | 0.31997300 | 0.32550000 | 0.32890800 | 0.33011100 | 0.32959600 | 0.32779800 | 0.32512000 |
| 0.27408900 | 0.27475400 | 0.27582000 | 0.27776100 | 0.28103700 | 0.28585500 | 0.29187500 | 0.29808600 | 0.30319000 | 0.30632400 | 0.30742200 | 0.30689700 | 0.30519000 | 0.30274100 |
| 0.30459200 | 0.30525100 | 0.30629600 | 0.30834700 | 0.31190700 | 0.31712000 | 0.32363500 | 0.33046500 | 0.33619900 | 0.33973100 | 0.34089600 | 0.34023000 | 0.33827800 | 0.33549800 |
| 0.29392300 | 0.29462800 | 0.29571500 | 0.29786800 | 0.30160700 | 0.30704000 | 0.31370900 | 0.32049300 | 0.32597500 | 0.32928500 | 0.33046300 | 0.32995200 | 0.32810500 | 0.32534900 |
| 0.26650200 | 0.26706100 | 0.26811800 | 0.27019400 | 0.27364400 | 0.27848500 | 0.28436600 | 0.29044500 | 0.29552100 | 0.29873600 | 0.30003200 | 0.29973900 | 0.29810300 | 0.29551200 |
| 0.16255300 | 0.16277900 | 0.16329800 | 0.16440100 | 0.16632300 | 0.16918200 | 0.17277500 | 0.17643600 | 0.17931400 | 0.18089700 | 0.18122600 | 0.18061400 | 0.17933600 | 0.17767700 |
| 0.17650900 | 0.17683000 | 0.17743100 | 0.17861700 | 0.18069800 | 0.18376200 | 0.18751200 | 0.19130100 | 0.19437100 | 0.19623600 | 0.19688900 | 0.19656400 | 0.19547500 | 0.19385500 |
| 0.21570200 | 0.21627600 | 0.21710800 | 0.21858900 | 0.22114900 | 0.22493500 | 0.22965100 | 0.23456300 | 0.23868400 | 0.24128300 | 0.24227400 | 0.24199200 | 0.24071600 | 0.23868800 |

| 4591       | 4593       | 4595       | 4597       | 4599       | 4601       | 4603       | 4605       | 4607       | 4608       | 4610       | 4612       | 4614       | 4616       |
|------------|------------|------------|------------|------------|------------|------------|------------|------------|------------|------------|------------|------------|------------|
| 0.32507700 | 0.32328100 | 0.32312400 | 0.32493400 | 0.32848500 | 0.33297800 | 0.33712700 | 0.33958200 | 0.33969100 | 0.33789400 | 0.33526100 | 0.33282000 | 0.33124000 | 0.33078000 |
| 0.31895800 | 0.31703600 | 0.31696900 | 0.31902700 | 0.32289000 | 0.32773800 | 0.33221900 | 0.33485300 | 0.33493000 | 0.33293700 | 0.33010100 | 0.32760700 | 0.32611400 | 0.32576500 |
| 0.32455500 | 0.32287000 | 0.32276100 | 0.32448300 | 0.32788700 | 0.33230800 | 0.33647000 | 0.33896800 | 0.33911400 | 0.33731200 | 0.33466800 | 0.33227300 | 0.33077600 | 0.33035400 |
| 0.33382500 | 0.33196200 | 0.33173400 | 0.33352700 | 0.33719600 | 0.34199700 | 0.34657100 | 0.34934900 | 0.34953700 | 0.34763600 | 0.34485400 | 0.34231000 | 0.34069700 | 0.34026500 |
| 0.22546600 | 0.22402000 | 0.22378000 | 0.22495600 | 0.22737600 | 0.23060300 | 0.23376800 | 0.23570500 | 0.23578300 | 0.23439600 | 0.23245200 | 0.23073100 | 0.22969000 | 0.22948300 |
| 0.32898400 | 0.32715400 | 0.32702300 | 0.32891700 | 0.33260600 | 0.33732000 | 0.34174500 | 0.34439600 | 0.34451400 | 0.34256500 | 0.33976100 | 0.33724400 | 0.33567000 | 0.33524200 |
| 0.33397100 | 0.33206100 | 0.33188600 | 0.33379500 | 0.33760900 | 0.34254400 | 0.34722300 | 0.35007800 | 0.35026100 | 0.34824400 | 0.34533800 | 0.34273500 | 0.34109300 | 0.34063800 |
| 0.27899700 | 0.27729400 | 0.27707300 | 0.27870900 | 0.28204500 | 0.28632400 | 0.29025200 | 0.29247900 | 0.29240800 | 0.29056900 | 0.28808800 | 0.28592500 | 0.28458100 | 0.28420800 |
| 0.32236900 | 0.32060500 | 0.32056500 | 0.32248900 | 0.32621400 | 0.33106700 | 0.33570400 | 0.33852400 | 0.33866200 | 0.33660400 | 0.33369600 | 0.33111400 | 0.32944400 | 0.32892300 |
| 0.30020000 | 0.29845200 | 0.29829800 | 0.30008400 | 0.30359100 | 0.30807800 | 0.31228600 | 0.31478100 | 0.31481600 | 0.31285600 | 0.31013900 | 0.30779500 | 0.30639600 | 0.30608100 |
| 0.33264400 | 0.33073100 | 0.33060100 | 0.33259300 | 0.33647500 | 0.34142000 | 0.34603700 | 0.34879000 | 0.34890100 | 0.34690300 | 0.34410500 | 0.34161600 | 0.33999200 | 0.33945500 |
| 0.32249300 | 0.32058800 | 0.32047400 | 0.32248500 | 0.32640600 | 0.33137600 | 0.33593300 | 0.33858700 | 0.33866400 | 0.33670400 | 0.33394700 | 0.33144300 | 0.32979600 | 0.32930800 |
| 0.29276800 | 0.29087200 | 0.29062400 | 0.29234400 | 0.29578400 | 0.30021300 | 0.30443800 | 0.30704600 | 0.30722700 | 0.30535600 | 0.30259600 | 0.30011800 | 0.29864600 | 0.29835100 |
| 0.17605600 | 0.17496300 | 0.17479600 | 0.17574700 | 0.17775000 | 0.18040000 | 0.18289900 | 0.18430800 | 0.18417500 | 0.18285800 | 0.18111900 | 0.17957900 | 0.17857000 | 0.17823900 |
| 0.19212300 | 0.19088600 | 0.19068100 | 0.19170800 | 0.19380700 | 0.19651000 | 0.19904400 | 0.20055800 | 0.20061700 | 0.19948600 | 0.19782700 | 0.19626200 | 0.19522000 | 0.19489100 |
| 0.23646300 | 0.23488700 | 0.23465000 | 0.23598000 | 0.23865400 | 0.24207300 | 0.24531100 | 0.24735600 | 0.24760300 | 0.24624400 | 0.24414900 | 0.24227100 | 0.24117500 | 0.24101600 |

| 4618       | 4620       | 4622       | 4624       | 4626       | 4628       | 4630       | 4632       | 4634       | 4635       | 4637       | 4639       | 4641       | 4643       |
|------------|------------|------------|------------|------------|------------|------------|------------|------------|------------|------------|------------|------------|------------|
| 0.33139300 | 0.33286200 | 0.33498600 | 0.33763600 | 0.34054400 | 0.34321100 | 0.34521600 | 0.34651000 | 0.34727900 | 0.34761200 | 0.34757000 | 0.34748600 | 0.34773000 | 0.34804000 |
| 0.32646500 | 0.32806000 | 0.33037700 | 0.33320100 | 0.33621200 | 0.33898000 | 0.34113800 | 0.34257600 | 0.34335700 | 0.34359700 | 0.34357400 | 0.34368200 | 0.34404000 | 0.34423200 |
| 0.33091300 | 0.33232600 | 0.33448100 | 0.33712500 | 0.33987900 | 0.34241300 | 0.34446800 | 0.34587200 | 0.34663800 | 0.34693600 | 0.34700400 | 0.34712900 | 0.34746400 | 0.34764900 |
| 0.34094200 | 0.34252800 | 0.34486000 | 0.34775900 | 0.35083300 | 0.35356700 | 0.35566600 | 0.35714000 | 0.35805100 | 0.35840200 | 0.35835400 | 0.35836000 | 0.35872500 | 0.35902800 |
| 0.23003400 | 0.23118600 | 0.23283200 | 0.23483800 | 0.23689800 | 0.23870100 | 0.24014100 | 0.24119500 | 0.24181500 | 0.24202400 | 0.24198100 | 0.24195800 | 0.24213900 | 0.24229100 |
| 0.33593200 | 0.33764800 | 0.34024100 | 0.34334200 | 0.34640000 | 0.34900800 | 0.35101700 | 0.35234900 | 0.35302500 | 0.35324800 | 0.35326200 | 0.35330500 | 0.35355500 | 0.35373100 |
| 0.34134300 | 0.34308200 | 0.34563200 | 0.34866300 | 0.35176900 | 0.35452300 | 0.35663400 | 0.35805300 | 0.35884000 | 0.35912200 | 0.35920200 | 0.35945900 | 0.35996700 | 0.36023600 |
| 0.28476600 | 0.28614300 | 0.28820000 | 0.29072600 | 0.29338000 | 0.29576500 | 0.29764000 | 0.29896900 | 0.29974700 | 0.29996400 | 0.29982800 | 0.29976100 | 0.29998500 | 0.30015700 |
| 0.32959500 | 0.33130800 | 0.33380300 | 0.33679100 | 0.33988800 | 0.34266200 | 0.34485100 | 0.34638400 | 0.34724500 | 0.34751900 | 0.34749400 | 0.34758300 | 0.34798900 | 0.34829100 |
| 0.30679000 | 0.30836600 | 0.31060000 | 0.31326200 | 0.31603300 | 0.31852800 | 0.32047300 | 0.32178600 | 0.32252400 | 0.32280400 | 0.32279200 | 0.32279400 | 0.32305700 | 0.32325700 |
| 0.34004900 | 0.34167400 | 0.34413600 | 0.34715800 | 0.35034300 | 0.35322900 | 0.35548100 | 0.35701200 | 0.35787900 | 0.35818000 | 0.35814700 | 0.35816100 | 0.35845200 | 0.35865100 |
| 0.32998800 | 0.33164400 | 0.33407100 | 0.33702600 | 0.34014700 | 0.34300100 | 0.34527000 | 0.34685100 | 0.34773900 | 0.34800100 | 0.34789700 | 0.34787400 | 0.34819200 | 0.34847600 |
| 0.29910100 | 0.30074900 | 0.30309900 | 0.30585700 | 0.30870200 | 0.31128000 | 0.31327200 | 0.31458000 | 0.31530200 | 0.31558700 | 0.31563200 | 0.31569500 | 0.31592300 | 0.31604600 |
| 0.17859600 | 0.17952300 | 0.18084500 | 0.18241500 | 0.18404500 | 0.18548500 | 0.18657500 | 0.18726900 | 0.18757700 | 0.18759400 | 0.18749300 | 0.18747300 | 0.18763700 | 0.18775000 |
| 0.19525100 | 0.19623300 | 0.19776200 | 0.19963100 | 0.20152100 | 0.20313200 | 0.20428500 | 0.20502600 | 0.20550900 | 0.20575800 | 0.20575500 | 0.20567000 | 0.20569700 | 0.20570000 |
| 0.24166400 | 0.24288300 | 0.24453600 | 0.24655900 | 0.24876900 | 0.25083800 | 0.25250000 | 0.25368100 | 0.25438500 | 0.25463100 | 0.25456100 | 0.25445900 | 0.25455000 | 0.25465900 |



| 4645       | 4647       | 4649       | 4651       | 4653       | 4655       | 4657       | 4659       | 4661       | 4662       | 4664       | 4666       | 4668       | 4670       |
|------------|------------|------------|------------|------------|------------|------------|------------|------------|------------|------------|------------|------------|------------|
| 0.34749100 | 0.34541800 | 0.34222800 | 0.33907500 | 0.33690700 | 0.33598400 | 0.33608900 | 0.33693600 | 0.33832000 | 0.33996700 | 0.34136500 | 0.34186400 | 0.34082800 | 0.33781100 |
| 0.34349000 | 0.34130400 | 0.33800900 | 0.33468500 | 0.33232900 | 0.33125500 | 0.33130400 | 0.33225700 | 0.33384600 | 0.33563800 | 0.33710400 | 0.33764600 | 0.33656100 | 0.33331200 |
| 0.34685900 | 0.34463600 | 0.34148400 | 0.33842400 | 0.33622400 | 0.33518400 | 0.33528100 | 0.33628800 | 0.33782100 | 0.33942700 | 0.34065500 | 0.34102600 | 0.33995500 | 0.33697900 |
| 0.35831300 | 0.35602100 | 0.35264400 | 0.34935000 | 0.34704500 | 0.34594300 | 0.34589500 | 0.34676500 | 0.34837300 | 0.35028300 | 0.35184100 | 0.35237600 | 0.35125400 | 0.34796800 |
| 0.24180500 | 0.24028800 | 0.23801000 | 0.23568000 | 0.23392300 | 0.23300800 | 0.23293600 | 0.23362300 | 0.23486600 | 0.23622500 | 0.23717900 | 0.23735200 | 0.23644400 | 0.23419300 |
| 0.35303600 | 0.35091000 | 0.34772900 | 0.34452300 | 0.34215500 | 0.34096100 | 0.34094800 | 0.34195700 | 0.34364200 | 0.34547500 | 0.34687200 | 0.34728500 | 0.34610200 | 0.34281600 |
| 0.35947100 | 0.35722800 | 0.35389500 | 0.35050200 | 0.34801600 | 0.34684100 | 0.34691400 | 0.34798000 | 0.34967200 | 0.35150700 | 0.35294600 | 0.35339100 | 0.35219200 | 0.34889100 |
| 0.29951800 | 0.29758300 | 0.29470900 | 0.29183800 | 0.28974600 | 0.28871400 | 0.28874500 | 0.28971600 | 0.29125600 | 0.29285200 | 0.29410200 | 0.29457100 | 0.29360200 | 0.29070300 |
| 0.34758900 | 0.34534900 | 0.34202900 | 0.33870200 | 0.33626400 | 0.33507900 | 0.33510000 | 0.33612600 | 0.33786400 | 0.33979900 | 0.34125400 | 0.34161900 | 0.34034300 | 0.33700600 |
| 0.32255100 | 0.32046600 | 0.31745800 | 0.31450600 | 0.31238300 | 0.31137600 | 0.31147800 | 0.31254300 | 0.31419500 | 0.31583300 | 0.31692000 | 0.31711900 | 0.31600900 | 0.31305600 |
| 0.35786000 | 0.35552500 | 0.35215900 | 0.34891700 | 0.34661800 | 0.34543400 | 0.34528700 | 0.34613400 | 0.34780300 | 0.34978100 | 0.35136400 | 0.35187500 | 0.35067400 | 0.34732500 |
| 0.34782700 | 0.34564800 | 0.34232800 | 0.33899400 | 0.33662700 | 0.33554900 | 0.33564300 | 0.33668000 | 0.33835300 | 0.34019700 | 0.34164000 | 0.34212100 | 0.34102700 | 0.33779300 |
| 0.31534600 | 0.31330700 | 0.31032500 | 0.30740900 | 0.30528600 | 0.30415400 | 0.30403600 | 0.30491400 | 0.30651700 | 0.30828500 | 0.30963000 | 0.31006900 | 0.30903000 | 0.30596800 |
| 0.18731000 | 0.18605600 | 0.18427300 | 0.18254000 | 0.18128500 | 0.18064700 | 0.18061500 | 0.18112300 | 0.18201100 | 0.18300300 | 0.18375800 | 0.18393900 | 0.18321500 | 0.18133000 |
| 0.20520000 | 0.20383600 | 0.20184700 | 0.19992000 | 0.19858700 | 0.19796100 | 0.19795700 | 0.19848200 | 0.19941600 | 0.20051700 | 0.20139800 | 0.20160700 | 0.20075000 | 0.19866300 |
| 0.25416000 | 0.25256500 | 0.25014700 | 0.24772200 | 0.24594500 | 0.24503700 | 0.24499200 | 0.24570000 | 0.24691300 | 0.24826000 | 0.24935700 | 0.24978400 | 0.24899400 | 0.24653000 |

| 4672       | 4674       | 4676       | 4678       | 4680       | 4682       | 4684       | 4686       | 4688       | 4689       | 4691       | 4693       | 4695       | 4697       |
|------------|------------|------------|------------|------------|------------|------------|------------|------------|------------|------------|------------|------------|------------|
| 0.33299700 | 0.32737900 | 0.32204500 | 0.31744900 | 0.31359600 | 0.31048600 | 0.30806600 | 0.30603900 | 0.30391200 | 0.30128100 | 0.29814600 | 0.29487100 | 0.29173800 | 0.28872600 |
| 0.32808600 | 0.32193000 | 0.31608400 | 0.31120600 | 0.30732200 | 0.30424600 | 0.30178200 | 0.29959800 | 0.29723900 | 0.29439000 | 0.29108500 | 0.28760400 | 0.28421200 | 0.28097100 |
| 0.33228100 | 0.32678800 | 0.32155700 | 0.31712000 | 0.31347800 | 0.31052800 | 0.30820400 | 0.30625300 | 0.30417700 | 0.30154700 | 0.29837100 | 0.29506600 | 0.29196600 | 0.28900800 |
| 0.34264600 | 0.33636200 | 0.33045300 | 0.32558900 | 0.32172500 | 0.31865300 | 0.31621600 | 0.31415200 | 0.31199100 | 0.30927300 | 0.30592900 | 0.30235300 | 0.29899300 | 0.29589900 |
| 0.23065800 | 0.22642100 | 0.22225400 | 0.21864300 | 0.21571800 | 0.21342700 | 0.21159600 | 0.20995300 | 0.20820700 | 0.20615100 | 0.20376400 | 0.20124700 | 0.19887500 | 0.19671600 |
| 0.33762900 | 0.33156900 | 0.32577300 | 0.32089000 | 0.31702700 | 0.31397900 | 0.31151500 | 0.30938600 | 0.30714300 | 0.30435800 | 0.30102500 | 0.29750400 | 0.29413500 | 0.29096200 |
| 0.34367500 | 0.33749000 | 0.33146100 | 0.32624900 | 0.32197800 | 0.31855800 | 0.31587100 | 0.31365600 | 0.31142800 | 0.30875000 | 0.30551500 | 0.30197100 | 0.29848900 | 0.29519600 |
| 0.28612200 | 0.28082100 | 0.27581800 | 0.27160800 | 0.26819500 | 0.26544900 | 0.26324700 | 0.26134100 | 0.25931400 | 0.25684400 | 0.25395900 | 0.25093400 | 0.24803300 | 0.24532500 |
| 0.33178900 | 0.32567300 | 0.31982900 | 0.31490300 | 0.31094800 | 0.30778400 | 0.30523400 | 0.30303600 | 0.30072200 | 0.29787400 | 0.29448800 | 0.29095800 | 0.28765900 | 0.28456200 |
| 0.30827900 | 0.30259100 | 0.29712200 | 0.29247000 | 0.28870100 | 0.28569300 | 0.28329400 | 0.28123200 | 0.27905700 | 0.27639900 | 0.27328200 | 0.27004600 | 0.26693800 | 0.26393900 |
| 0.34209600 | 0.33602400 | 0.33019800 | 0.32516200 | 0.32101200 | 0.31772800 | 0.31523100 | 0.31319900 | 0.31103200 | 0.30825200 | 0.30490600 | 0.30142700 | 0.29812400 | 0.29492000 |
| 0.33253200 | 0.32629900 | 0.32030500 | 0.31516700 | 0.31100600 | 0.30775700 | 0.30523500 | 0.30309400 | 0.30081500 | 0.29793400 | 0.29442300 | 0.29071600 | 0.28726600 | 0.28408200 |
| 0.30100300 | 0.29513400 | 0.28956300 | 0.28494000 | 0.28129900 | 0.27842700 | 0.27609600 | 0.27402600 | 0.27182500 | 0.26917200 | 0.26607300 | 0.26281300 | 0.25966300 | 0.25663200 |
| 0.17839800 | 0.17500500 | 0.17181300 | 0.16911900 | 0.16688600 | 0.16506700 | 0.16366500 | 0.16247600 | 0.16109900 | 0.15931800 | 0.15726700 | 0.15520900 | 0.15330900 | 0.15154600 |
| 0.19556100 | 0.19197500 | 0.18848600 | 0.18546200 | 0.18298300 | 0.18098000 | 0.17936700 | 0.17797700 | 0.17649700 | 0.17466900 | 0.17253600 | 0.17036700 | 0.16837100 | 0.16650700 |
| 0.24251600 | 0.23776400 | 0.23323200 | 0.22945300 | 0.22646000 | 0.22410200 | 0.22221900 | 0.22053700 | 0.21870400 | 0.21649400 | 0.21389400 | 0.21112500 | 0.20849900 | 0.20610600 |

| 4699       | 4701       | 4703       | 4705       | 4707       | 4709       | 4711       | 4713       | 4715       | 4716       | 4718       | 4720       | 4722       | 4724       |
|------------|------------|------------|------------|------------|------------|------------|------------|------------|------------|------------|------------|------------|------------|
| 0.28563800 | 0.28234000 | 0.27899700 | 0.27607100 | 0.27395300 | 0.27275500 | 0.27251600 | 0.27347000 | 0.27601900 | 0.28056400 | 0.28748700 | 0.29723600 | 0.31024000 | 0.32656100 |
| 0.27768100 | 0.27412400 | 0.27054000 | 0.26751800 | 0.26538800 | 0.26414300 | 0.26386200 | 0.26485100 | 0.26748200 | 0.27214500 | 0.27929000 | 0.28945200 | 0.30319400 | 0.32069700 |
| 0.28591400 | 0.28258700 | 0.27931400 | 0.27660200 | 0.27476500 | 0.27376100 | 0.27349500 | 0.27420800 | 0.27641700 | 0.28063400 | 0.28727100 | 0.29673700 | 0.30944700 | 0.32549500 |
| 0.29273000 | 0.28924500 | 0.28569300 | 0.28261700 | 0.28039500 | 0.27912100 | 0.27884000 | 0.27977600 | 0.28233900 | 0.28698200 | 0.29415100 | 0.30435900 | 0.31809800 | 0.33543800 |
| 0.19455000 | 0.19222100 | 0.18990200 | 0.18786300 | 0.18623800 | 0.18515800 | 0.18482100 | 0.18541600 | 0.18713100 | 0.19024400 | 0.19512400 | 0.20218600 | 0.21179700 | 0.22400400 |
| 0.28775900 | 0.28437000 | 0.28101000 | 0.27811000 | 0.27596600 | 0.27465800 | 0.27428400 | 0.27514200 | 0.27766500 | 0.28227700 | 0.28939900 | 0.29950500 | 0.31305800 | 0.33017300 |
| 0.29186500 | 0.28830600 | 0.28474200 | 0.28164800 | 0.27937500 | 0.27804700 | 0.27774000 | 0.27867300 | 0.28124700 | 0.28596600 | 0.29333700 | 0.30384400 | 0.31796000 | 0.33582700 |
| 0.24261300 | 0.23964800 | 0.23655500 | 0.23383100 | 0.23188700 | 0.23080500 | 0.23058600 | 0.23141400 | 0.23364500 | 0.23766100 | 0.24381100 | 0.25250400 | 0.26425400 | 0.27927100 |
| 0.28134900 | 0.27788800 | 0.27444900 | 0.27148700 | 0.26931900 | 0.26806400 | 0.26782400 | 0.26882300 | 0.27141000 | 0.27604500 | 0.28326800 | 0.29364000 | 0.30764900 | 0.32534300 |
| 0.26090000 | 0.25772100 | 0.25451300 | 0.25166500 | 0.24958800 | 0.24841700 | 0.24813900 | 0.24895300 | 0.25128500 | 0.25557700 | 0.26224700 | 0.27175500 | 0.28453000 | 0.30066500 |
| 0.29155800 | 0.28794200 | 0.28435100 | 0.28128600 | 0.27907000 | 0.27776100 | 0.27742300 | 0.27835200 | 0.28103200 | 0.28590600 | 0.29329600 | 0.30364000 | 0.31756300 | 0.33529900 |
| 0.28080300 | 0.27725500 | 0.27373100 | 0.27067900 | 0.26841400 | 0.26713000 | 0.26696700 | 0.26810000 | 0.27082300 | 0.27556600 | 0.28286300 | 0.29328700 | 0.30732400 | 0.32504900 |
| 0.25352700 | 0.25026300 | 0.24706400 | 0.24433100 | 0.24233500 | 0.24113000 | 0.24080200 | 0.24162700 | 0.24395200 | 0.24817000 | 0.25479600 | 0.26438000 | 0.27733800 | 0.29366100 |
| 0.14975800 | 0.14785200 | 0.14594200 | 0.14427000 | 0.14304200 | 0.14232500 | 0.14212900 | 0.14257700 | 0.14388600 | 0.14628100 | 0.15002100 | 0.15543400 | 0.16282300 | 0.17226700 |
| 0.16458000 | 0.16250100 | 0.16041000 | 0.15855300 | 0.15714700 | 0.15629600 | 0.15600100 | 0.15636700 | 0.15769200 | 0.16030700 | 0.16451400 | 0.17064600 | 0.17897000 | 0.18945600 |
| 0.20376300 | 0.20131800 | 0.19886000 | 0.19664800 | 0.19491700 | 0.19381700 | 0.19349400 | 0.19414200 | 0.19598000 | 0.19930400 | 0.20452600 | 0.21212000 | 0.22249100 | 0.23569100 |

| 4726       | 4728       | 4730       | 4732       | 4734       | 4736       | 4738       | 4740       | 4742       | 4743       | 4745       | 4747       | 4749       | 4751       |
|------------|------------|------------|------------|------------|------------|------------|------------|------------|------------|------------|------------|------------|------------|
| 0.34501800 | 0.36184500 | 0.37068700 | 0.36625700 | 0.34921500 | 0.32601700 | 0.30373600 | 0.28604200 | 0.27315300 | 0.26381900 | 0.25686900 | 0.25153100 | 0.24714600 | 0.24309200 |
| 0.34067200 | 0.35898900 | 0.36875300 | 0.36416100 | 0.34593100 | 0.32118100 | 0.29750400 | 0.27867000 | 0.26491200 | 0.25500200 | 0.24768200 | 0.24207500 | 0.23751100 | 0.23335000 |
| 0.34367700 | 0.36023200 | 0.36900100 | 0.36490400 | 0.34855500 | 0.32615500 | 0.30448400 | 0.28711700 | 0.27439900 | 0.26516700 | 0.25820600 | 0.25279800 | 0.24846500 | 0.24460400 |
| 0.35512800 | 0.37321900 | 0.38293900 | 0.37848300 | 0.36050100 | 0.33599200 | 0.31243100 | 0.29363300 | 0.27994000 | 0.27009600 | 0.26276600 | 0.25708300 | 0.25242100 | 0.24819400 |
| 0.23790800 | 0.25074600 | 0.25785400 | 0.25520300 | 0.24304800 | 0.22607600 | 0.20956400 | 0.19630300 | 0.18657600 | 0.17956900 | 0.17439100 | 0.17039700 | 0.16711900 | 0.16414000 |
| 0.34965900 | 0.36757600 | 0.37725300 | 0.37306900 | 0.35557500 | 0.33145500 | 0.30809900 | 0.28939300 | 0.27569200 | 0.26579900 | 0.25848200 | 0.25284600 | 0.24819400 | 0.24395300 |
| 0.35619700 | 0.37496000 | 0.38515000 | 0.38078700 | 0.36241600 | 0.33717400 | 0.31287700 | 0.29351900 | 0.27935800 | 0.26910500 | 0.26150300 | 0.25567200 | 0.25089100 | 0.24652600 |
| 0.29646100 | 0.31227200 | 0.32082000 | 0.31718100 | 0.30183700 | 0.28064700 | 0.26011700 | 0.24373700 | 0.23187100 | 0.22337900 | 0.21706300 | 0.21216400 | 0.20815300 | 0.20452600 |
| 0.34535800 | 0.36361200 | 0.37336000 | 0.36884400 | 0.35061400 | 0.32568500 | 0.30175700 | 0.28273500 | 0.26886900 | 0.25888100 | 0.25146400 | 0.24570300 | 0.24096700 | 0.23669400 |
| 0.31907000 | 0.33610700 | 0.34541400 | 0.34150000 | 0.32486200 | 0.30195200 | 0.27988900 | 0.26237900 | 0.24967500 | 0.24051900 | 0.23365400 | 0.22826400 | 0.22383000 | 0.21990200 |
| 0.35553700 | 0.37409600 | 0.38405000 | 0.37958900 | 0.36135800 | 0.33636900 | 0.31223700 | 0.29290700 | 0.27876300 | 0.26862300 | 0.26119200 | 0.25550800 | 0.25084400 | 0.24655400 |
| 0.34521300 | 0.36375300 | 0.37367800 | 0.36906100 | 0.35060700 | 0.32547600 | 0.30137500 | 0.28225000 | 0.26837300 | 0.25840700 | 0.25101000 | 0.24529900 | 0.24063800 | 0.23641400 |
| 0.31212900 | 0.32905100 | 0.33816100 | 0.33412700 | 0.31753800 | 0.29481400 | 0.27290300 | 0.25537300 | 0.24253500 | 0.23326100 | 0.22636200 | 0.22104400 | 0.21672500 | 0.21284200 |
| 0.18309300 | 0.19305000 | 0.19836400 | 0.19592000 | 0.18606700 | 0.17255100 | 0.15954900 | 0.14927800 | 0.14191600 | 0.13669200 | 0.13280200 | 0.12972100 | 0.12714700 | 0.12484000 |
| 0.20127400 | 0.21202400 | 0.21778000 | 0.21526700 | 0.20479600 | 0.19031900 | 0.17629500 | 0.16506700 | 0.15678400 | 0.15071500 | 0.14623300 | 0.14290400 | 0.14024100 | 0.13774900 |
| 0.25072500 | 0.26454500 | 0.27207800 | 0.26908400 | 0.25599100 | 0.23779900 | 0.22003400 | 0.20570300 | 0.19522600 | 0.18775300 | 0.18226100 | 0.17799500 | 0.17446000 | 0.17127200 |

| 4753       | 4755       | 4757       | 4759       | 4761       | 4763       | 4765       | 4767       | 4769       | 4770       | 4772       | 4774       | 4776       | 4778       |
|------------|------------|------------|------------|------------|------------|------------|------------|------------|------------|------------|------------|------------|------------|
| 0.23901700 | 0.23502300 | 0.23154800 | 0.22898100 | 0.22733400 | 0.22619200 | 0.22490300 | 0.22306200 | 0.22101500 | 0.21943800 | 0.21821400 | 0.21652800 | 0.21424900 | 0.21220600 |
| 0.22917900 | 0.22506100 | 0.22141200 | 0.21863000 | 0.21680700 | 0.21559700 | 0.21428600 | 0.21233900 | 0.21007700 | 0.20829800 | 0.20701300 | 0.20539900 | 0.20318600 | 0.20111000 |
| 0.24070800 | 0.23679200 | 0.23331100 | 0.23069100 | 0.22902800 | 0.22796300 | 0.22678000 | 0.22499200 | 0.22292500 | 0.22126000 | 0.21997100 | 0.21836600 | 0.21624200 | 0.21426500 |
| 0.24400900 | 0.23987000 | 0.23618000 | 0.23341800 | 0.23166700 | 0.23045500 | 0.22904300 | 0.22703700 | 0.22484000 | 0.22314700 | 0.22185800 | 0.22016700 | 0.21789200 | 0.21581700 |
| 0.16117600 | 0.15825500 | 0.15565400 | 0.15363700 | 0.15227300 | 0.15135500 | 0.15044100 | 0.14920900 | 0.14782000 | 0.14664100 | 0.14561100 | 0.14434000 | 0.14281600 | 0.14146200 |
| 0.23977800 | 0.23574200 | 0.23224100 | 0.22957000 | 0.22771800 | 0.22638200 | 0.22497700 | 0.22305200 | 0.22090500 | 0.21923700 | 0.21798700 | 0.21633100 | 0.21402300 | 0.21187600 |
| 0.24219500 | 0.23796100 | 0.23426200 | 0.23149400 | 0.22967800 | 0.22841700 | 0.22702200 | 0.22503200 | 0.22281500 | 0.22107900 | 0.21971700 | 0.21793800 | 0.21556800 | 0.21338900 |
| 0.20092800 | 0.19739100 | 0.19429900 | 0.19199900 | 0.19049300 | 0.18944600 | 0.18833100 | 0.18676100 | 0.18494400 | 0.18344200 | 0.18226600 | 0.18080400 | 0.17887200 | 0.17708500 |
| 0.23244600 | 0.22826100 | 0.22463400 | 0.22195900 | 0.22018800 | 0.21890700 | 0.21748100 | 0.21551700 | 0.21336800 | 0.21167300 | 0.21032600 | 0.20859300 | 0.20631400 | 0.20423800 |
| 0.21607800 | 0.21227200 | 0.20881400 | 0.20612000 | 0.20432900 | 0.20317000 | 0.20198800 | 0.20027400 | 0.19830500 | 0.19673300 | 0.19551100 | 0.19392600 | 0.19179500 | 0.18981900 |
| 0.24223000 | 0.23799400 | 0.23433200 | 0.23159800 | 0.22978600 | 0.22853700 | 0.22719800 | 0.22529100 | 0.22315000 | 0.22149600 | 0.22021700 | 0.21847100 | 0.21610300 | 0.21393300 |
| 0.23218100 | 0.22796900 | 0.22423900 | 0.22142900 | 0.21959800 | 0.21833300 | 0.21690100 | 0.21486500 | 0.21266300 | 0.21102400 | 0.20980500 | 0.20816900 | 0.20592700 | 0.20383900 |
| 0.20900200 | 0.20523400 | 0.20190800 | 0.19938000 | 0.19769400 | 0.19648800 | 0.19514400 | 0.19328400 | 0.19123700 | 0.18964200 | 0.18845100 | 0.18694300 | 0.18488500 | 0.18296300 |
| 0.12258900 | 0.12037400 | 0.11841400 | 0.11691900 | 0.11589400 | 0.11513100 | 0.11429200 | 0.11317100 | 0.11196900 | 0.11104400 | 0.11034200 | 0.10945700 | 0.10828200 | 0.10718100 |
| 0.13521500 | 0.13276700 | 0.13065100 | 0.12901500 | 0.12788800 | 0.12712700 | 0.12632900 | 0.12516600 | 0.12382100 | 0.12273400 | 0.12188000 | 0.12079900 | 0.11939300 | 0.11813700 |
| 0.16812200 | 0.16498100 | 0.16218100 | 0.16008000 | 0.15871700 | 0.15777700 | 0.15675000 | 0.15529800 | 0.15366800 | 0.15238400 | 0.15140200 | 0.15016600 | 0.14856300 | 0.14712200 |

| 4780       | 4782       | 4784       | 4786       | 4788       | 4790       | 4792       | 4794       | 4796       | 4797       | 4799       | 4801       | 4803       | 4805       |
|------------|------------|------------|------------|------------|------------|------------|------------|------------|------------|------------|------------|------------|------------|
| 0.21108100 | 0.21084300 | 0.21103700 | 0.21109800 | 0.21060500 | 0.20946700 | 0.20786900 | 0.20606800 | 0.20421100 | 0.20229200 | 0.20024100 | 0.19804400 | 0.19580100 | 0.19362300 |
| 0.19987300 | 0.19952900 | 0.19970200 | 0.19983800 | 0.19942500 | 0.19829300 | 0.19665900 | 0.19483300 | 0.19293900 | 0.19093800 | 0.18879200 | 0.18653800 | 0.18424300 | 0.18195800 |
| 0.21312300 | 0.21288000 | 0.21310100 | 0.21320800 | 0.21280600 | 0.21183200 | 0.21042000 | 0.20872000 | 0.20683700 | 0.20484100 | 0.20277100 | 0.20063300 | 0.19843400 | 0.19623300 |
| 0.21464100 | 0.21433800 | 0.21446200 | 0.21451700 | 0.21411400 | 0.21309600 | 0.21156600 | 0.20975100 | 0.20779400 | 0.20568400 | 0.20341500 | 0.20108200 | 0.19877300 | 0.19650400 |
| 0.14058600 | 0.14020900 | 0.14017300 | 0.14020000 | 0.13998400 | 0.13936400 | 0.13839300 | 0.13722000 | 0.13590800 | 0.13443600 | 0.13285600 | 0.13130300 | 0.12983600 | 0.12841400 |
| 0.21069900 | 0.21049200 | 0.21073600 | 0.21087800 | 0.21046200 | 0.20928900 | 0.20758200 | 0.20571700 | 0.20382000 | 0.20179000 | 0.19959300 | 0.19732200 | 0.19505700 | 0.19284100 |
| 0.21217600 | 0.21197100 | 0.21224700 | 0.21237600 | 0.21192200 | 0.21076300 | 0.20909600 | 0.20722400 | 0.20527500 | 0.20319200 | 0.20096100 | 0.19868700 | 0.19644000 | 0.19421700 |
| 0.17605700 | 0.17581400 | 0.17598500 | 0.17611300 | 0.17578800 | 0.17484100 | 0.17345500 | 0.17192000 | 0.17032800 | 0.16860500 | 0.16673400 | 0.16479000 | 0.16282000 | 0.16087100 |
| 0.20305100 | 0.20276000 | 0.20291600 | 0.20296700 | 0.20250100 | 0.20141100 | 0.19984600 | 0.19801700 | 0.19605400 | 0.19397900 | 0.19180100 | 0.18955400 | 0.18726100 | 0.18495200 |
| 0.18866400 | 0.18833500 | 0.18842400 | 0.18848600 | 0.18814900 | 0.18722300 | 0.18580900 | 0.18415300 | 0.18239000 | 0.18051600 | 0.17849400 | 0.17631700 | 0.17405900 | 0.17186300 |
| 0.21265700 | 0.21233500 | 0.21259700 | 0.21282500 | 0.21245400 | 0.21135400 | 0.20978400 | 0.20800800 | 0.20610800 | 0.20405700 | 0.20182100 | 0.19944800 | 0.19708300 | 0.19481500 |
| 0.20263200 | 0.20237300 | 0.20260700 | 0.20272700 | 0.20229400 | 0.20120100 | 0.19962800 | 0.19780800 | 0.19582100 | 0.19366900 | 0.19141600 | 0.18912100 | 0.18681200 | 0.18454300 |
| 0.18186200 | 0.18156800 | 0.18165000 | 0.18167500 | 0.18130600 | 0.18038300 | 0.17899400 | 0.17735500 | 0.17561600 | 0.17380400 | 0.17187300 | 0.16981000 | 0.16767700 | 0.16557100 |
| 0.10654300 | 0.10642500 | 0.10657400 | 0.10664500 | 0.10640000 | 0.10576800 | 0.10485400 | 0.10384600 | 0.10281700 | 0.10172500 | 0.10053700 | 0.09924900 | 0.09790100 | 0.09659900 |
| 0.11743200 | 0.11723900 | 0.11728000 | 0.11725200 | 0.11693700 | 0.11628500 | 0.11539500 | 0.11437700 | 0.11325800 | 0.11204000 | 0.11076300 | 0.10945600 | 0.10811900 | 0.10675700 |
| 0.14627900 | 0.14598500 | 0.14595500 | 0.14590700 | 0.14558000 | 0.14480300 | 0.14364300 | 0.14231400 | 0.14092400 | 0.13942800 | 0.13780100 | 0.13614000 | 0.13453700 | 0.13298800 |

| 4807       | 4809       | 4811       | 4813       | 4815       | 4817       | 4819       | 4821       | 4823       | 4824       | 4826       | 4828       | 4830       | 4832       |
|------------|------------|------------|------------|------------|------------|------------|------------|------------|------------|------------|------------|------------|------------|
| 0.19152700 | 0.18951900 | 0.18766900 | 0.18603200 | 0.18461600 | 0.18343200 | 0.18256800 | 0.18218400 | 0.18240400 | 0.18323000 | 0.18456600 | 0.18619200 | 0.18769100 | 0.18853400 |
| 0.17975100 | 0.17770200 | 0.17582200 | 0.17410100 | 0.17262400 | 0.17149800 | 0.17075000 | 0.17042700 | 0.17063200 | 0.17144300 | 0.17282400 | 0.17451200 | 0.17599900 | 0.17675700 |
| 0.19412900 | 0.19218300 | 0.19039200 | 0.18876300 | 0.18735600 | 0.18624100 | 0.18547800 | 0.18515900 | 0.18537200 | 0.18613000 | 0.18735800 | 0.18886700 | 0.19029000 | 0.19114200 |
| 0.19430400 | 0.19221500 | 0.19026500 | 0.18853400 | 0.18710800 | 0.18597900 | 0.18515800 | 0.18480500 | 0.18508400 | 0.18597100 | 0.18729500 | 0.18884800 | 0.19028900 | 0.19110300 |
| 0.12702100 | 0.12567200 | 0.12437200 | 0.12317100 | 0.12216700 | 0.12140400 | 0.12089400 | 0.12070600 | 0.12088500 | 0.12137500 | 0.12212100 | 0.12306200 | 0.12397600 | 0.12450200 |
| 0.19071900 | 0.18869800 | 0.18678800 | 0.18508000 | 0.18366900 | 0.18258100 | 0.18183000 | 0.18148300 | 0.18165200 | 0.18240000 | 0.18365200 | 0.18518000 | 0.18662300 | 0.18751000 |
| 0.19203700 | 0.18993500 | 0.18793800 | 0.18612000 | 0.18459500 | 0.18342800 | 0.18263800 | 0.18230800 | 0.18255100 | 0.18337800 | 0.18468600 | 0.18629000 | 0.18782500 | 0.18872900 |
| 0.15902000 | 0.15728700 | 0.15564700 | 0.15414200 | 0.15287300 | 0.15192100 | 0.15132400 | 0.15110400 | 0.15132600 | 0.15206700 | 0.15326900 | 0.15465300 | 0.15584900 | 0.15650000 |
| 0.18272100 | 0.18067600 | 0.17885400 | 0.17721700 | 0.17573800 | 0.17447800 | 0.17358900 | 0.17322500 | 0.17346700 | 0.17430000 | 0.17564300 | 0.17730500 | 0.17888100 | 0.17980400 |
| 0.16986000 | 0.16806200 | 0.16640300 | 0.16488600 | 0.16358100 | 0.16252200 | 0.16176300 | 0.16142500 | 0.16162000 | 0.16237300 | 0.16359000 | 0.16500600 | 0.16623400 | 0.16687900 |
| 0.19261700 | 0.19047100 | 0.18846800 | 0.18674200 | 0.18532100 | 0.18416300 | 0.18330200 | 0.18288800 | 0.18308400 | 0.18394200 | 0.18533400 | 0.18698200 | 0.18849200 | 0.18938800 |
| 0.18236600 | 0.18028200 | 0.17833200 | 0.17664000 | 0.17524800 | 0.17408700 | 0.17321500 | 0.17285000 | 0.17309800 | 0.17389900 | 0.17516700 | 0.17675300 | 0.17828800 | 0.17921700 |
| 0.16356600 | 0.16168200 | 0.15991500 | 0.15833200 | 0.15702900 | 0.15601500 | 0.15530200 | 0.15500700 | 0.15523700 | 0.15597000 | 0.15709600 | 0.15843800 | 0.15968000 | 0.16038600 |
| 0.09542500 | 0.09436100 | 0.09336700 | 0.09246900 | 0.09173100 | 0.09115300 | 0.09070400 | 0.09044400 | 0.09050400 | 0.09093300 | 0.09164500 | 0.09246200 | 0.09316900 | 0.09355700 |
| 0.10540800 | 0.10413500 | 0.10297700 | 0.10196000 | 0.10113100 | 0.10050300 | 0.10003700 | 0.09977700 | 0.09984900 | 0.10030600 | 0.10106000 | 0.10190600 | 0.10258500 | 0.10290100 |
| 0.13146000 | 0.12994600 | 0.12850100 | 0.12724700 | 0.12627200 | 0.12555400 | 0.12506300 | 0.12483300 | 0.12491200 | 0.12536300 | 0.12621800 | 0.12733100 | 0.12835500 | 0.12889700 |

| 4834       | 4836       | 4838       | 4840       | 4842       | 4844       | 4846       | 4848       | 4850       | 4851       | 4853       | 4855       | 4857       | 4859       |
|------------|------------|------------|------------|------------|------------|------------|------------|------------|------------|------------|------------|------------|------------|
| 0.18833500 | 0.18708600 | 0.18522700 | 0.18343800 | 0.18227300 | 0.18201700 | 0.18275900 | 0.18438800 | 0.18650500 | 0.18843400 | 0.18935000 | 0.18851700 | 0.18563400 | 0.18111300 |
| 0.17649000 | 0.17525000 | 0.17344500 | 0.17167400 | 0.17047200 | 0.17016700 | 0.17088800 | 0.17255300 | 0.17475600 | 0.17675200 | 0.17765300 | 0.17673900 | 0.17377400 | 0.16921000 |
| 0.19102800 | 0.18990400 | 0.18817700 | 0.18645200 | 0.18523600 | 0.18491400 | 0.18568300 | 0.18737800 | 0.18949200 | 0.19134500 | 0.19214300 | 0.19119100 | 0.18829200 | 0.18392200 |
| 0.19087000 | 0.18960200 | 0.18777200 | 0.18604000 | 0.18491700 | 0.18468000 | 0.18545600 | 0.18714600 | 0.18932400 | 0.19129100 | 0.19218700 | 0.19124800 | 0.18823600 | 0.18363000 |
| 0.12436400 | 0.12357300 | 0.12244500 | 0.12138200 | 0.12068300 | 0.12054700 | 0.12105200 | 0.12208400 | 0.12335000 | 0.12444000 | 0.12487000 | 0.12421000 | 0.12231200 | 0.11944400 |
| 0.18740500 | 0.18624700 | 0.18449800 | 0.18280800 | 0.18164100 | 0.18128000 | 0.18190400 | 0.18347100 | 0.18558700 | 0.18752700 | 0.18841500 | 0.18753000 | 0.18464400 | 0.18019400 |
| 0.18853300 | 0.18723700 | 0.18532600 | 0.18346200 | 0.18219900 | 0.18189700 | 0.18269800 | 0.18444200 | 0.18664000 | 0.18857400 | 0.18942900 | 0.18850600 | 0.18558000 | 0.18108000 |
| 0.15631900 | 0.15528400 | 0.15376300 | 0.15228500 | 0.15125400 | 0.15092200 | 0.15143700 | 0.15275000 | 0.15451400 | 0.15614800 | 0.15695400 | 0.15628700 | 0.15386600 | 0.15004400 |
| 0.17963800 | 0.17839300 | 0.17652600 | 0.17466500 | 0.17337200 | 0.17300800 | 0.17370700 | 0.17538100 | 0.17762500 | 0.17968300 | 0.18063700 | 0.17973900 | 0.17673800 | 0.17206700 |
| 0.16665500 | 0.16555600 | 0.16394600 | 0.16237300 | 0.16129300 | 0.16099300 | 0.16163300 | 0.16316100 | 0.16520300 | 0.16708900 | 0.16798600 | 0.16718800 | 0.16449400 | 0.16036400 |
| 0.18927500 | 0.18811000 | 0.18627500 | 0.18439000 | 0.18306700 | 0.18272000 | 0.18348500 | 0.18519100 | 0.18736800 | 0.18930000 | 0.19015000 | 0.18919600 | 0.18620400 | 0.18162900 |
| 0.17909000 | 0.17786500 | 0.17599100 | 0.17415600 | 0.17292900 | 0.17262300 | 0.17333800 | 0.17495700 | 0.17711000 | 0.17915600 | 0.18020100 | 0.17937600 | 0.17639800 | 0.17178900 |
| 0.16022700 | 0.15919500 | 0.15763800 | 0.15607200 | 0.15499500 | 0.15477000 | 0.15552100 | 0.15707900 | 0.15900900 | 0.16069800 | 0.16145200 | 0.16065700 | 0.15803800 | 0.15393800 |
| 0.09345600 | 0.09282900 | 0.09187700 | 0.09096800 | 0.09044600 | 0.09046300 | 0.09098700 | 0.09191500 | 0.09307400 | 0.09412300 | 0.09460100 | 0.09411100 | 0.09251100 | 0.09003200 |
| 0.10274100 | 0.10210100 | 0.10114900 | 0.10022100 | 0.09964300 | 0.09957200 | 0.10001700 | 0.10093700 | 0.10214900 | 0.10324600 | 0.10372800 | 0.10320200 | 0.10155900 | 0.09902800 |
| 0.12874000 | 0.12794100 | 0.12678000 | 0.12562000 | 0.12481500 | 0.12463500 | 0.12516500 | 0.12627100 | 0.12765700 | 0.12891800 | 0.12951800 | 0.12890800 | 0.12686500 | 0.12369900 |



| 4861       | 4863       | 4865       | 4867       | 4869       | 4871       | 4873       | 4875       | 4877       | 4878       | 4880       | 4882       | 4884       | 4886       |
|------------|------------|------------|------------|------------|------------|------------|------------|------------|------------|------------|------------|------------|------------|
| 0.17585800 | 0.17070200 | 0.16612200 | 0.16227900 | 0.15913900 | 0.15659600 | 0.15451400 | 0.15275900 | 0.15123800 | 0.14989200 | 0.14866500 | 0.14754100 | 0.14652300 | 0.14561300 |
| 0.16395600 | 0.15881300 | 0.15420100 | 0.15027500 | 0.14704500 | 0.14444600 | 0.14235500 | 0.14061200 | 0.13909600 | 0.13774700 | 0.13653500 | 0.13544500 | 0.13444600 | 0.13352400 |
| 0.17892800 | 0.17404500 | 0.16966800 | 0.16592000 | 0.16282000 | 0.16034900 | 0.15840000 | 0.15679700 | 0.15537000 | 0.15402600 | 0.15276700 | 0.15162200 | 0.15059800 | 0.14970800 |
| 0.17832000 | 0.17311200 | 0.16845600 | 0.16449900 | 0.16125400 | 0.15864900 | 0.15654500 | 0.15476900 | 0.15319000 | 0.15174700 | 0.15043600 | 0.14927000 | 0.14822400 | 0.14725800 |
| 0.11612800 | 0.11281500 | 0.10976100 | 0.10711700 | 0.10496600 | 0.10327300 | 0.10190700 | 0.10075300 | 0.09976200 | 0.09889100 | 0.09810500 | 0.09740500 | 0.09677700 | 0.09619500 |
| 0.17502100 | 0.16988700 | 0.16526500 | 0.16137000 | 0.15819200 | 0.15559600 | 0.15346300 | 0.15170400 | 0.15020400 | 0.14887200 | 0.14766800 | 0.14655100 | 0.14549900 | 0.14458100 |
| 0.17581300 | 0.17053100 | 0.16572700 | 0.16166700 | 0.15841200 | 0.15581200 | 0.15364100 | 0.15177700 | 0.15020500 | 0.14889600 | 0.14776800 | 0.14671300 | 0.14568000 | 0.14473800 |
| 0.14561000 | 0.14129400 | 0.13745800 | 0.13416000 | 0.13136900 | 0.12909900 | 0.12731900 | 0.12585700 | 0.12452700 | 0.12330300 | 0.12224100 | 0.12132000 | 0.12048600 | 0.11975900 |
| 0.16665200 | 0.16138300 | 0.15672500 | 0.15279200 | 0.14958100 | 0.14700500 | 0.14488700 | 0.14307200 | 0.14150900 | 0.14017900 | 0.13902000 | 0.13794800 | 0.13690500 | 0.13593200 |
| 0.15561200 | 0.15090800 | 0.14661400 | 0.14290800 | 0.13985800 | 0.13740500 | 0.13542200 | 0.13379200 | 0.13240600 | 0.13116900 | 0.13004100 | 0.12901900 | 0.12811900 | 0.12733900 |
| 0.17635400 | 0.17116900 | 0.16651900 | 0.16257700 | 0.15935000 | 0.15672800 | 0.15457000 | 0.15275000 | 0.15115300 | 0.14971400 | 0.14843600 | 0.14731200 | 0.14629600 | 0.14536000 |
| 0.16646700 | 0.16121100 | 0.15649800 | 0.15255500 | 0.14939200 | 0.14683800 | 0.14470800 | 0.14291800 | 0.14142200 | 0.14015000 | 0.13900500 | 0.13788400 | 0.13675700 | 0.13572300 |
| 0.14916600 | 0.14449100 | 0.14034000 | 0.13683300 | 0.13393400 | 0.13157100 | 0.12963700 | 0.12798000 | 0.12650600 | 0.12522000 | 0.12411900 | 0.12314900 | 0.12226300 | 0.12149300 |
| 0.08716600 | 0.08436100 | 0.08187800 | 0.07981000 | 0.07812600 | 0.07674600 | 0.07560700 | 0.07463000 | 0.07374200 | 0.07296100 | 0.07234700 | 0.07188700 | 0.07146900 | 0.07100000 |
| 0.09604400 | 0.09304000 | 0.09031800 | 0.08804100 | 0.08622200 | 0.08476500 | 0.08356900 | 0.08256500 | 0.08167700 | 0.08086000 | 0.08014200 | 0.07953800 | 0.07898400 | 0.07844200 |
| 0.12003800 | 0.11641000 | 0.11311200 | 0.11030300 | 0.10802700 | 0.10621800 | 0.10474700 | 0.10349200 | 0.10239400 | 0.10142100 | 0.10054500 | 0.09975700 | 0.09905200 | 0.09841800 |

| 4888       | 4890       | 4892       | 4894       | 4896       | 4898       | 4900       | 4902       | 4904       | 4905       | 4907       | 4909       | 4911       | 4913       |
|------------|------------|------------|------------|------------|------------|------------|------------|------------|------------|------------|------------|------------|------------|
| 0.14484600 | 0.14427200 | 0.14392500 | 0.14383100 | 0.14392500 | 0.14402000 | 0.14401800 | 0.14403600 | 0.14420900 | 0.14450000 | 0.14480900 | 0.14516400 | 0.14565700 | 0.14626700 |
| 0.13273900 | 0.13216200 | 0.13179400 | 0.13163700 | 0.13170200 | 0.13187300 | 0.13197600 | 0.13201800 | 0.13211000 | 0.13227500 | 0.13248900 | 0.13280200 | 0.13329900 | 0.13396200 |
| 0.14896800 | 0.14839600 | 0.14803100 | 0.14789600 | 0.14793800 | 0.14805700 | 0.14818500 | 0.14829700 | 0.14838900 | 0.14850400 | 0.14871400 | 0.14906500 | 0.14957400 | 0.15022400 |
| 0.14642400 | 0.14584900 | 0.14557400 | 0.14551000 | 0.14554900 | 0.14562900 | 0.14569900 | 0.14573200 | 0.14578400 | 0.14594800 | 0.14623300 | 0.14659500 | 0.14707000 | 0.14772200 |
| 0.09567900 | 0.09527600 | 0.09498600 | 0.09480200 | 0.09476000 | 0.09486100 | 0.09501400 | 0.09510500 | 0.09512400 | 0.09516200 | 0.09529500 | 0.09552300 | 0.09582900 | 0.09618800 |
| 0.14386600 | 0.14332100 | 0.14292500 | 0.14276300 | 0.14286800 | 0.14305400 | 0.14313300 | 0.14314300 | 0.14321000 | 0.14336000 | 0.14357400 | 0.14389500 | 0.14440600 | 0.14509000 |
| 0.14397900 | 0.14340100 | 0.14296900 | 0.14270800 | 0.14265400 | 0.14274700 | 0.14287300 | 0.14297600 | 0.14308700 | 0.14324200 | 0.14345300 | 0.14376900 | 0.14428100 | 0.14498900 |
| 0.11918400 | 0.11876400 | 0.11850600 | 0.11843500 | 0.11850500 | 0.11859700 | 0.11864200 | 0.11864200 | 0.11865500 | 0.11874500 | 0.11891700 | 0.11916300 | 0.11955900 | 0.12014200 |
| 0.13513000 | 0.13453600 | 0.13416000 | 0.13405800 | 0.13419300 | 0.13435000 | 0.13438500 | 0.13437500 | 0.13445000 | 0.13464500 | 0.13493000 | 0.13530300 | 0.13581700 | 0.13650400 |
| 0.12663200 | 0.12601000 | 0.12559000 | 0.12542300 | 0.12544000 | 0.12555600 | 0.12569100 | 0.12578400 | 0.12587000 | 0.12603400 | 0.12628700 | 0.12659800 | 0.12700300 | 0.12755200 |
| 0.14453300 | 0.14390000 | 0.14355400 | 0.14351100 | 0.14365600 | 0.14382400 | 0.14391600 | 0.14392700 | 0.14393700 | 0.14404200 | 0.14426400 | 0.14458800 | 0.14507400 | 0.14576500 |
| 0.13489900 | 0.13432500 | 0.13397800 | 0.13383400 | 0.13387100 | 0.13400900 | 0.13412800 | 0.13420900 | 0.13433000 | 0.13452100 | 0.13477200 | 0.13512100 | 0.13562200 | 0.13627500 |
| 0.12088100 | 0.12041200 | 0.12008300 | 0.11994400 | 0.12000700 | 0.12016000 | 0.12024100 | 0.12020700 | 0.12017200 | 0.12026500 | 0.12049900 | 0.12082100 | 0.12121600 | 0.12170100 |
| 0.07052100 | 0.07014000 | 0.06990700 | 0.06982400 | 0.06985000 | 0.06989300 | 0.06988700 | 0.06986200 | 0.06986100 | 0.06990200 | 0.07001900 | 0.07023100 | 0.07051300 | 0.07084600 |
| 0.07798600 | 0.07767500 | 0.07746500 | 0.07731700 | 0.07725600 | 0.07728000 | 0.07733200 | 0.07738500 | 0.07746300 | 0.07757000 | 0.07771300 | 0.07792600 | 0.07820900 | 0.07850900 |
| 0.09787900 | 0.09745900 | 0.09715000 | 0.09696200 | 0.09691200 | 0.09695600 | 0.09703000 | 0.09712300 | 0.09725400 | 0.09741100 | 0.09757900 | 0.09778800 | 0.09809300 | 0.09850000 |

| 4915       | 4917       | 4919       | 4921       | 4923       | 4925       | 4927       | 4929       | 4931       | 4932       | 4934       | 4936       | 4938       | 4940       |
|------------|------------|------------|------------|------------|------------|------------|------------|------------|------------|------------|------------|------------|------------|
| 0.14689000 | 0.14743100 | 0.14779500 | 0.14793800 | 0.14796900 | 0.14808000 | 0.14840200 | 0.14898900 | 0.14985200 | 0.15093800 | 0.15216100 | 0.15349400 | 0.15498300 | 0.15673500 |
| 0.13463500 | 0.13515600 | 0.13547900 | 0.13563500 | 0.13570400 | 0.13584000 | 0.13619500 | 0.13683300 | 0.13777600 | 0.13898000 | 0.14030000 | 0.14162200 | 0.14303900 | 0.14480900 |
| 0.15090700 | 0.15144200 | 0.15170200 | 0.15174100 | 0.15175800 | 0.15189100 | 0.15221800 | 0.15285500 | 0.15384700 | 0.15504800 | 0.15625200 | 0.15741100 | 0.15867900 | 0.16032200 |
| 0.14846200 | 0.14907800 | 0.14943500 | 0.14956300 | 0.14960600 | 0.14973300 | 0.15008000 | 0.15069800 | 0.15156900 | 0.15265500 | 0.15391300 | 0.15529400 | 0.15681300 | 0.15863700 |
| 0.09653200 | 0.09682500 | 0.09706600 | 0.09721100 | 0.09724800 | 0.09729700 | 0.09751300 | 0.09794200 | 0.09852700 | 0.09920700 | 0.09999800 | 0.10091800 | 0.10195300 | 0.10316300 |
| 0.14577700 | 0.14630500 | 0.14662000 | 0.14673700 | 0.14677000 | 0.14689800 | 0.14725700 | 0.14789300 | 0.14877600 | 0.14984400 | 0.15105800 | 0.15239800 | 0.15390000 | 0.15570400 |
| 0.14574800 | 0.14636800 | 0.14673900 | 0.14687300 | 0.14689600 | 0.14700600 | 0.14737400 | 0.14805200 | 0.14898500 | 0.15011300 | 0.15139800 | 0.15278200 | 0.15425700 | 0.15600000 |
| 0.12075300 | 0.12120700 | 0.12150800 | 0.12170900 | 0.12179100 | 0.12181700 | 0.12198200 | 0.12245300 | 0.12326900 | 0.12433800 | 0.12548800 | 0.12662500 | 0.12783100 | 0.12930500 |
| 0.13724200 | 0.13783200 | 0.13819100 | 0.13833400 | 0.13833900 | 0.13839200 | 0.13868900 | 0.13929800 | 0.14020100 | 0.14134800 | 0.14264200 | 0.14399100 | 0.14544100 | 0.14722200 |
| 0.12816900 | 0.12869100 | 0.12901400 | 0.12915200 | 0.12921000 | 0.12933300 | 0.12963800 | 0.13017700 | 0.13097100 | 0.13200100 | 0.13315100 | 0.13431800 | 0.13559500 | 0.13721100 |
| 0.14654300 | 0.14719600 | 0.14759400 | 0.14775300 | 0.14780100 | 0.14791200 | 0.14825400 | 0.14892000 | 0.14988800 | 0.15105700 | 0.15233400 | 0.15367400 | 0.15511000 | 0.15682500 |
| 0.13698100 | 0.13757300 | 0.13790800 | 0.13797300 | 0.13792300 | 0.13801100 | 0.13841200 | 0.13913800 | 0.14009400 | 0.14120100 | 0.14242100 | 0.14373300 | 0.14519100 | 0.14698000 |
| 0.12223900 | 0.12273300 | 0.12310700 | 0.12332000 | 0.12338200 | 0.12343100 | 0.12370400 | 0.12431900 | 0.12521000 | 0.12626900 | 0.12742800 | 0.12865000 | 0.12998700 | 0.13159100 |
| 0.07120200 | 0.07149700 | 0.07167200 | 0.07174400 | 0.07175400 | 0.07179800 | 0.07202000 | 0.07245100 | 0.07298700 | 0.07354300 | 0.07413200 | 0.07478300 | 0.07553400 | 0.07649200 |
| 0.07878100 | 0.07900400 | 0.07915200 | 0.07922400 | 0.07927400 | 0.07937900 | 0.07958500 | 0.07991900 | 0.08038800 | 0.08098000 | 0.08167900 | 0.08248000 | 0.08339600 | 0.08444900 |
| 0.09892900 | 0.09927000 | 0.09947600 | 0.09957100 | 0.09961000 | 0.09968400 | 0.09992800 | 0.10042400 | 0.10112700 | 0.10194500 | 0.10284000 | 0.10381300 | 0.10487700 | 0.10611000 |

| 4942       | 4944       | 4946       | 4948       | 4950       | 4952       | 4954       | 4956       | 4958       | 4959       | 4961       | 4963       | 4965       | 4967       |
|------------|------------|------------|------------|------------|------------|------------|------------|------------|------------|------------|------------|------------|------------|
| 0.15897200 | 0.16193800 | 0.16566000 | 0.16986200 | 0.17401400 | 0.17735200 | 0.17905200 | 0.17862200 | 0.17619800 | 0.17247100 | 0.16835700 | 0.16463400 | 0.16170700 | 0.15959300 |
| 0.14718100 | 0.15026200 | 0.15398400 | 0.15808800 | 0.16210800 | 0.16536100 | 0.16709800 | 0.16682200 | 0.16456400 | 0.16090900 | 0.15675300 | 0.15290200 | 0.14981500 | 0.14760600 |
| 0.16256700 | 0.16550100 | 0.16908000 | 0.17308500 | 0.17703900 | 0.18023300 | 0.18188100 | 0.18146800 | 0.17911900 | 0.17553900 | 0.17159900 | 0.16797300 | 0.16501700 | 0.16286400 |
| 0.16103200 | 0.16417400 | 0.16801300 | 0.17226900 | 0.17644400 | 0.17979300 | 0.18148500 | 0.18104100 | 0.17860900 | 0.17484300 | 0.17061400 | 0.16671400 | 0.16362900 | 0.16144900 |
| 0.10470100 | 0.10666100 | 0.10900200 | 0.11158000 | 0.11411100 | 0.11613500 | 0.11716200 | 0.11692500 | 0.11551000 | 0.11329600 | 0.11076100 | 0.10832500 | 0.10629100 | 0.10479200 |
| 0.15800100 | 0.16095400 | 0.16461200 | 0.16874500 | 0.17278500 | 0.17598100 | 0.17763100 | 0.17730700 | 0.17507800 | 0.17153800 | 0.16751200 | 0.16370300 | 0.16055700 | 0.15826700 |
| 0.15832400 | 0.16144500 | 0.16530400 | 0.16958400 | 0.17375800 | 0.17707300 | 0.17874500 | 0.17832800 | 0.17593400 | 0.17217400 | 0.16794800 | 0.16409800 | 0.16106200 | 0.15886200 |
| 0.13123900 | 0.13373700 | 0.13677500 | 0.14020800 | 0.14368500 | 0.14650700 | 0.14790100 | 0.14754000 | 0.14563700 | 0.14268300 | 0.13926700 | 0.13600700 | 0.13337100 | 0.13150800 |
| 0.14960100 | 0.15270400 | 0.15646400 | 0.16063900 | 0.16476000 | 0.16809400 | 0.16985000 | 0.16952200 | 0.16717700 | 0.16347300 | 0.15933200 | 0.15552000 | 0.15244700 | 0.15021400 |
| 0.13935000 | 0.14213000 | 0.14554500 | 0.14935400 | 0.15310200 | 0.15614900 | 0.15776100 | 0.15745400 | 0.15532300 | 0.15198600 | 0.14823600 | 0.14474800 | 0.14193100 | 0.13990600 |
| 0.15912800 | 0.16224500 | 0.16610900 | 0.17037500 | 0.17451200 | 0.17781300 | 0.17951500 | 0.17914500 | 0.17680200 | 0.17309600 | 0.16889200 | 0.16500800 | 0.16192500 | 0.15973400 |
| 0.14933100 | 0.15239900 | 0.15617200 | 0.16038500 | 0.16447900 | 0.16769700 | 0.16932300 | 0.16896200 | 0.16669900 | 0.16307600 | 0.15893300 | 0.15508700 | 0.15200500 | 0.14977000 |
| 0.13366000 | 0.13635200 | 0.13967000 | 0.14339300 | 0.14705800 | 0.14998300 | 0.15146100 | 0.15110900 | 0.14904100 | 0.14581300 | 0.14219000 | 0.13881500 | 0.13602700 | 0.13396500 |
| 0.07779300 | 0.07947100 | 0.08145100 | 0.08361100 | 0.08573200 | 0.08744200 | 0.08831700 | 0.08809200 | 0.08681500 | 0.08482700 | 0.08257700 | 0.08046300 | 0.07876800 | 0.07758700 |
| 0.08571400 | 0.08733000 | 0.08935600 | 0.09167200 | 0.09397800 | 0.09582300 | 0.09676500 | 0.09657600 | 0.09530100 | 0.09325000 | 0.09093300 | 0.08880200 | 0.08704300 | 0.08569300 |
| 0.10769200 | 0.10980200 | 0.11242900 | 0.11532600 | 0.11810300 | 0.12030100 | 0.12144600 | 0.12122400 | 0.11969300 | 0.11727500 | 0.11451900 | 0.11187400 | 0.10961500 | 0.10789000 |

| 4969       | 4971       | 4973       | 4975       | 4977       | 4979       | 4981       | 4983       | 4985       | 4986       | 4988       | 4990       | 4992       | 4994       |
|------------|------------|------------|------------|------------|------------|------------|------------|------------|------------|------------|------------|------------|------------|
| 0.15814300 | 0.15717600 | 0.15639000 | 0.15531900 | 0.15356800 | 0.15105200 | 0.14798700 | 0.14473400 | 0.14160700 | 0.13875500 | 0.13620300 | 0.13395400 | 0.13201700 | 0.13040100 |
| 0.14616000 | 0.14522400 | 0.14441900 | 0.14330600 | 0.14156200 | 0.13910800 | 0.13608900 | 0.13279100 | 0.12953300 | 0.12655300 | 0.12398500 | 0.12185000 | 0.12007000 | 0.11855100 |
| 0.16150000 | 0.16069800 | 0.16001300 | 0.15896500 | 0.15723400 | 0.15476500 | 0.15177900 | 0.14861100 | 0.14553500 | 0.14270400 | 0.14018000 | 0.13802000 | 0.13626600 | 0.13484900 |
| 0.16000500 | 0.15902200 | 0.15816300 | 0.15700800 | 0.15517600 | 0.15257000 | 0.14945000 | 0.14617200 | 0.14297200 | 0.13998400 | 0.13729700 | 0.13499200 | 0.13313000 | 0.13166300 |
| 0.10376000 | 0.10300400 | 0.10232100 | 0.10151100 | 0.10036700 | 0.09878400 | 0.09685300 | 0.09477300 | 0.09272000 | 0.09080500 | 0.08909500 | 0.08763200 | 0.08642400 | 0.08544100 |
| 0.15679600 | 0.15587500 | 0.15508300 | 0.15398400 | 0.15226000 | 0.14983200 | 0.14685200 | 0.14357200 | 0.14029100 | 0.13728500 | 0.13468800 | 0.13249100 | 0.13062900 | 0.12907100 |
| 0.15736500 | 0.15638000 | 0.15556000 | 0.15444000 | 0.15266500 | 0.15017000 | 0.14710500 | 0.14372300 | 0.14033700 | 0.13726000 | 0.13466500 | 0.13251700 | 0.13071000 | 0.12920700 |
| 0.13029600 | 0.12947900 | 0.12874900 | 0.12777800 | 0.12627100 | 0.12412300 | 0.12151300 | 0.11877300 | 0.11615400 | 0.11374100 | 0.11154900 | 0.10963500 | 0.10806600 | 0.10683800 |
| 0.14870000 | 0.14766000 | 0.14679800 | 0.14572100 | 0.14400300 | 0.14149300 | 0.13842300 | 0.13512300 | 0.13182400 | 0.12873500 | 0.12607300 | 0.12391000 | 0.12213800 | 0.12064300 |
| 0.13856700 | 0.13766200 | 0.13683400 | 0.13570300 | 0.13401800 | 0.13174200 | 0.12901000 | 0.12605000 | 0.12311800 | 0.12042300 | 0.11805400 | 0.11601800 | 0.11431700 | 0.11294600 |
| 0.15831000 | 0.15741500 | 0.15666800 | 0.15559200 | 0.15380600 | 0.15124600 | 0.14813600 | 0.14477400 | 0.14142300 | 0.13830900 | 0.13559600 | 0.13333400 | 0.13146300 | 0.12991700 |
| 0.14825800 | 0.14724700 | 0.14641500 | 0.14534300 | 0.14363700 | 0.14114200 | 0.13801800 | 0.13463000 | 0.13134800 | 0.12839400 | 0.12583200 | 0.12364000 | 0.12177900 | 0.12025200 |
| 0.13262800 | 0.13178800 | 0.13102900 | 0.12994400 | 0.12829000 | 0.12603900 | 0.12333800 | 0.12040900 | 0.11748800 | 0.11479500 | 0.11247100 | 0.11051500 | 0.10885800 | 0.10749200 |
| 0.07682200 | 0.07630000 | 0.07584700 | 0.07526000 | 0.07433500 | 0.07299500 | 0.07136500 | 0.06966300 | 0.06803900 | 0.06654200 | 0.06518600 | 0.06400000 | 0.06300900 | 0.06219700 |
| 0.08476700 | 0.08418200 | 0.08368600 | 0.08298200 | 0.08190900 | 0.08048500 | 0.07880900 | 0.07699000 | 0.07515500 | 0.07344300 | 0.07193700 | 0.07066300 | 0.06961300 | 0.06876200 |
| 0.10672300 | 0.10597700 | 0.10537100 | 0.10457600 | 0.10333500 | 0.10159800 | 0.09953500 | 0.09733000 | 0.09507800 | 0.09291700 | 0.09103600 | 0.08951500 | 0.08828200 | 0.08721600 |

| 4996       | 4998       | 5000       | 5002       | 5004       | 5006       | 5008       | 5010       | 5012       | 5013       | 5015       | 5017       | 5019       | 5021       |
|------------|------------|------------|------------|------------|------------|------------|------------|------------|------------|------------|------------|------------|------------|
| 0.12910600 | 0.12810000 | 0.12731200 | 0.12666600 | 0.12609700 | 0.12550100 | 0.12474600 | 0.12374900 | 0.12254800 | 0.12126800 | 0.12002600 | 0.11892500 | 0.11804300 | 0.11737100 |
| 0.11727100 | 0.11626000 | 0.11551300 | 0.11494600 | 0.11441700 | 0.11378000 | 0.11294700 | 0.11191800 | 0.11075200 | 0.10954800 | 0.10840600 | 0.10738700 | 0.10651500 | 0.10581200 |
| 0.13365900 | 0.13267800 | 0.13192400 | 0.13134300 | 0.13081800 | 0.13021800 | 0.12943800 | 0.12844900 | 0.12731700 | 0.12613700 | 0.12498400 | 0.12393200 | 0.12303100 | 0.12228600 |
| 0.13044300 | 0.12939700 | 0.12859600 | 0.12805200 | 0.12758800 | 0.12697300 | 0.12610800 | 0.12501000 | 0.12374000 | 0.12240500 | 0.12114500 | 0.12007500 | 0.11921300 | 0.11851100 |
| 0.08463000 | 0.08397100 | 0.08348000 | 0.08313700 | 0.08283600 | 0.08243800 | 0.08186900 | 0.08115200 | 0.08036700 | 0.07958000 | 0.07881000 | 0.07808200 | 0.07747100 | 0.07703200 |
| 0.12782700 | 0.12687300 | 0.12614200 | 0.12556700 | 0.12505400 | 0.12445900 | 0.12364800 | 0.12259100 | 0.12137000 | 0.12011800 | 0.11895800 | 0.11798200 | 0.11721700 | 0.11659400 |
| 0.12799300 | 0.12703800 | 0.12632700 | 0.12580200 | 0.12530200 | 0.12465400 | 0.12377000 | 0.12267000 | 0.12144900 | 0.12018700 | 0.11894400 | 0.11782800 | 0.11695200 | 0.11630100 |
| 0.10588600 | 0.10513000 | 0.10450500 | 0.10398700 | 0.10354000 | 0.10304300 | 0.10235700 | 0.10144700 | 0.10038300 | 0.09928000 | 0.09824900 | 0.09735000 | 0.09659100 | 0.09596700 |
| 0.11940300 | 0.11840000 | 0.11761100 | 0.11703600 | 0.11658400 | 0.11603100 | 0.11517300 | 0.11399000 | 0.11265200 | 0.11138100 | 0.11025900 | 0.10924900 | 0.10836800 | 0.10766100 |
| 0.11184200 | 0.11092900 | 0.11017800 | 0.10958400 | 0.10909000 | 0.10855900 | 0.10783200 | 0.10685600 | 0.10572700 | 0.10457900 | 0.10347000 | 0.10247200 | 0.10169500 | 0.10113400 |
| 0.12867400 | 0.12771300 | 0.12700700 | 0.12648200 | 0.12597800 | 0.12530800 | 0.12438100 | 0.12323400 | 0.12198100 | 0.12074100 | 0.11957800 | 0.11850900 | 0.11755800 | 0.11677600 |
| 0.11905900 | 0.11813100 | 0.11737800 | 0.11674900 | 0.11617500 | 0.11553400 | 0.11470300 | 0.11364100 | 0.11241000 | 0.11113700 | 0.10996700 | 0.10898600 | 0.10819200 | 0.10754500 |
| 0.10644500 | 0.10568900 | 0.10510900 | 0.10458400 | 0.10405800 | 0.10347700 | 0.10272100 | 0.10174000 | 0.10064400 | 0.09956300 | 0.09853300 | 0.09757500 | 0.09675200 | 0.09609400 |
| 0.06152500 | 0.06100100 | 0.06063700 | 0.06038300 | 0.06015100 | 0.05985700 | 0.05944800 | 0.05892400 | 0.05830700 | 0.05759900 | 0.05686000 | 0.05621900 | 0.05574700 | 0.05542000 |
| 0.06808200 | 0.06754100 | 0.06707800 | 0.06665900 | 0.06631200 | 0.06601300 | 0.06561500 | 0.06503300 | 0.06436000 | 0.06369800 | 0.06305400 | 0.06242700 | 0.06185500 | 0.06136700 |
| 0.08628000 | 0.08551200 | 0.08492500 | 0.08449400 | 0.08417200 | 0.08382300 | 0.08328700 | 0.08252000 | 0.08161300 | 0.08069100 | 0.07985100 | 0.07913400 | 0.07853600 | 0.07804300 |

| 5023       | 5025       | 5027       | 5029       | 5031       | 5033       | 5035       | 5037       | 5039       | 5040       | 5042       | 5044       | 5046       | 5048       |
|------------|------------|------------|------------|------------|------------|------------|------------|------------|------------|------------|------------|------------|------------|
| 0.11684100 | 0.11643800 | 0.11617900 | 0.11602600 | 0.11590000 | 0.11577500 | 0.11564100 | 0.11544300 | 0.11515200 | 0.11483800 | 0.11454300 | 0.11424600 | 0.11395400 | 0.11369800 |
| 0.10529600 | 0.10494500 | 0.10470200 | 0.10452300 | 0.10439100 | 0.10425900 | 0.10405800 | 0.10378300 | 0.10352500 | 0.10333300 | 0.10314800 | 0.10291300 | 0.10263000 | 0.10234000 |
| 0.12169200 | 0.12128000 | 0.12104800 | 0.12093400 | 0.12085700 | 0.12075500 | 0.12055900 | 0.12025700 | 0.11993400 | 0.11966200 | 0.11940700 | 0.11912100 | 0.11883800 | 0.11861300 |
| 0.11794500 | 0.11752600 | 0.11723700 | 0.11704400 | 0.11691400 | 0.11678800 | 0.11660200 | 0.11637300 | 0.11617400 | 0.11600800 | 0.11581400 | 0.11555200 | 0.11519800 | 0.11479800 |
| 0.07673200 | 0.07649000 | 0.07627900 | 0.07614200 | 0.07607600 | 0.07601600 | 0.07592100 | 0.07578700 | 0.07561600 | 0.07540400 | 0.07516500 | 0.07491800 | 0.07464700 | 0.07437500 |
| 0.11602700 | 0.11555400 | 0.11525100 | 0.11506300 | 0.11488200 | 0.11470300 | 0.11453300 | 0.11433100 | 0.11410500 | 0.11389200 | 0.11367700 | 0.11340500 | 0.11303900 | 0.11262200 |
| 0.11577700 | 0.11537000 | 0.11514400 | 0.11506700 | 0.11501500 | 0.11489200 | 0.11467700 | 0.11441000 | 0.11414800 | 0.11389700 | 0.11363600 | 0.11335000 | 0.11302300 | 0.11269100 |
| 0.09548800 | 0.09517700 | 0.09501500 | 0.09490500 | 0.09479300 | 0.09471500 | 0.09465400 | 0.09451500 | 0.09428800 | 0.09406000 | 0.09384600 | 0.09358500 | 0.09325800 | 0.09293300 |
| 0.10711000 | 0.10670100 | 0.10646600 | 0.10635100 | 0.10623100 | 0.10605400 | 0.10583900 | 0.10559800 | 0.10532900 | 0.10503100 | 0.10471700 | 0.10440400 | 0.10410400 | 0.10383500 |
| 0.10069000 | 0.10032500 | 0.10003000 | 0.09976800 | 0.09954900 | 0.09940500 | 0.09929800 | 0.09917300 | 0.09901400 | 0.09879000 | 0.09847300 | 0.09809600 | 0.09773500 | 0.09745300 |
| 0.11619800 | 0.11581200 | 0.11556200 | 0.11538800 | 0.11527000 | 0.11519900 | 0.11512900 | 0.11500400 | 0.11480400 | 0.11453900 | 0.11423000 | 0.11390800 | 0.11357500 | 0.11322500 |
| 0.10701900 | 0.10658400 | 0.10622300 | 0.10597800 | 0.10586700 | 0.10577800 | 0.10557600 | 0.10527400 | 0.10497500 | 0.10471400 | 0.10447900 | 0.10427400 | 0.10406600 | 0.10381300 |
| 0.09558800 | 0.09522700 | 0.09497100 | 0.09475800 | 0.09459100 | 0.09448200 | 0.09435800 | 0.09414600 | 0.09390400 | 0.09370000 | 0.09350000 | 0.09325200 | 0.09295100 | 0.09263100 |
| 0.05518400 | 0.05501900 | 0.05491300 | 0.05482100 | 0.05470800 | 0.05460500 | 0.05453200 | 0.05445500 | 0.05433000 | 0.05415400 | 0.05397800 | 0.05382700 | 0.05364300 | 0.05340800 |
| 0.06099100 | 0.06075600 | 0.06063900 | 0.06057600 | 0.06051700 | 0.06042300 | 0.06025700 | 0.06005200 | 0.05989300 | 0.05978700 | 0.05963800 | 0.05938700 | 0.05909300 | 0.05885000 |
| 0.07766100 | 0.07739700 | 0.07723900 | 0.07715600 | 0.07711200 | 0.07705800 | 0.07694100 | 0.07673100 | 0.07646100 | 0.07621600 | 0.07603200 | 0.07585900 | 0.07562300 | 0.07532700 |

| 5050       | 5052       | 5054       | 5056       | 5058       | 5060       | 5062       | 5064       | 5066       | 5067       | 5069       | 5071       | 5073       | 5075       |
|------------|------------|------------|------------|------------|------------|------------|------------|------------|------------|------------|------------|------------|------------|
| 0.11346300 | 0.11320400 | 0.11290700 | 0.11263000 | 0.11247300 | 0.11245100 | 0.11245800 | 0.11240700 | 0.11229900 | 0.11217100 | 0.11203900 | 0.11191400 | 0.11181400 | 0.11174100 |
| 0.10209300 | 0.10189800 | 0.10170500 | 0.10149800 | 0.10131300 | 0.10119300 | 0.10117500 | 0.10123700 | 0.10127200 | 0.10119300 | 0.10102000 | 0.10083900 | 0.10071900 | 0.10066600 |
| 0.11841600 | 0.11817000 | 0.11786800 | 0.11763700 | 0.11757800 | 0.11761500 | 0.11763100 | 0.11761100 | 0.11755400 | 0.11738700 | 0.11709900 | 0.11682600 | 0.11670300 | 0.11669700 |
| 0.11447500 | 0.11426400 | 0.11407900 | 0.11389200 | 0.11374500 | 0.11364900 | 0.11359100 | 0.11355700 | 0.11348900 | 0.11331300 | 0.11304300 | 0.11281900 | 0.11275700 | 0.11279400 |
| 0.07418800 | 0.07411400 | 0.07409300 | 0.07405200 | 0.07394900 | 0.07381800 | 0.07374500 | 0.07372800 | 0.07366000 | 0.07350400 | 0.07337000 | 0.07334500 | 0.07337100 | 0.07334000 |
| 0.11226900 | 0.11203800 | 0.11189200 | 0.11179100 | 0.11171100 | 0.11163000 | 0.11155900 | 0.11150600 | 0.11143600 | 0.11132100 | 0.11118400 | 0.11104100 | 0.11089500 | 0.11077500 |
| 0.11244800 | 0.11229400 | 0.11212600 | 0.11193600 | 0.11181300 | 0.11177600 | 0.11177200 | 0.11177000 | 0.11173400 | 0.11163500 | 0.11150900 | 0.11139600 | 0.11129700 | 0.11119300 |
| 0.09267800 | 0.09248400 | 0.09229100 | 0.09209900 | 0.09197100 | 0.09192300 | 0.09191000 | 0.09188400 | 0.09180600 | 0.09165400 | 0.09146700 | 0.09134500 | 0.09133000 | 0.09135000 |
| 0.10359300 | 0.10332000 | 0.10301200 | 0.10278200 | 0.10271000 | 0.10274200 | 0.10277500 | 0.10273900 | 0.10262200 | 0.10246300 | 0.10229700 | 0.10214900 | 0.10205500 | 0.10203000 |
| 0.09726600 | 0.09714500 | 0.09703500 | 0.09688400 | 0.09671300 | 0.09659600 | 0.09654100 | 0.09648100 | 0.09637500 | 0.09623500 | 0.09611000 | 0.09606700 | 0.09610900 | 0.09613500 |
| 0.11289700 | 0.11262600 | 0.11240500 | 0.11222700 | 0.11211800 | 0.11208400 | 0.11207900 | 0.11204700 | 0.11195400 | 0.11181400 | 0.11166500 | 0.11153200 | 0.11143300 | 0.11138500 |
| 0.10355900 | 0.10334800 | 0.10313200 | 0.10288900 | 0.10269400 | 0.10258400 | 0.10251100 | 0.10243300 | 0.10234800 | 0.10227700 | 0.10222500 | 0.10216000 | 0.10205700 | 0.10193300 |
| 0.09236300 | 0.09216700 | 0.09197900 | 0.09178600 | 0.09165300 | 0.09159300 | 0.09154200 | 0.09147800 | 0.09142300 | 0.09135000 | 0.09121700 | 0.09107300 | 0.09101200 | 0.09101800 |
| 0.05321100 | 0.05310600 | 0.05303700 | 0.05296000 | 0.05290600 | 0.05289500 | 0.05290200 | 0.05285900 | 0.05271100 | 0.05250800 | 0.05235300 | 0.05227100 | 0.05224000 | 0.05224500 |
| 0.05870000 | 0.05861800 | 0.05854800 | 0.05848000 | 0.05845100 | 0.05846600 | 0.05848400 | 0.05846200 | 0.05838100 | 0.05825700 | 0.05812100 | 0.05799300 | 0.05788700 | 0.05780100 |
| 0.07507000 | 0.07489900 | 0.07474400 | 0.07458000 | 0.07448500 | 0.07450500 | 0.07457500 | 0.07460100 | 0.07454800 | 0.07443000 | 0.07426900 | 0.07410600 | 0.07400900 | 0.07397800 |



| 5077       | 5079       | 5081       | 5083       | 5085       | 5087       | 5089       | 5091       | 5093       | 5094       | 5096       | 5098       | 5100       | 5102       |
|------------|------------|------------|------------|------------|------------|------------|------------|------------|------------|------------|------------|------------|------------|
| 0.11170600 | 0.11174100 | 0.11188600 | 0.11215500 | 0.11253900 | 0.11303600 | 0.11365300 | 0.11433100 | 0.11489200 | 0.11511200 | 0.11489300 | 0.11432700 | 0.11360100 | 0.11287900 |
| 0.10065000 | 0.10068500 | 0.10084500 | 0.10115300 | 0.10154800 | 0.10200100 | 0.10255600 | 0.10319000 | 0.10374300 | 0.10400300 | 0.10385800 | 0.10338300 | 0.10273200 | 0.10200800 |
| 0.11670600 | 0.11674200 | 0.11688200 | 0.11713200 | 0.11746200 | 0.11790800 | 0.11849600 | 0.11911300 | 0.11955700 | 0.11969600 | 0.11953100 | 0.11911800 | 0.11851500 | 0.11782500 |
| 0.11280200 | 0.11279400 | 0.11290600 | 0.11321500 | 0.11368400 | 0.11423500 | 0.11478500 | 0.11526600 | 0.11565000 | 0.11588200 | 0.11582900 | 0.11541400 | 0.11472500 | 0.11395600 |
| 0.07322200 | 0.07311400 | 0.07314600 | 0.07333500 | 0.07360300 | 0.07392400 | 0.07430300 | 0.07468300 | 0.07496300 | 0.07504600 | 0.07490800 | 0.07461700 | 0.07421600 | 0.07370800 |
| 0.11073900 | 0.11082100 | 0.11100200 | 0.11126300 | 0.11162300 | 0.11208900 | 0.11263400 | 0.11320400 | 0.11368300 | 0.11389100 | 0.11369800 | 0.11315600 | 0.11247300 | 0.11182300 |
| 0.11107200 | 0.11099700 | 0.11108200 | 0.11136900 | 0.11181600 | 0.11238800 | 0.11304500 | 0.11366500 | 0.11410500 | 0.11428300 | 0.11416100 | 0.11372600 | 0.11304300 | 0.11228200 |
| 0.09133200 | 0.09130800 | 0.09135900 | 0.09153600 | 0.09185100 | 0.09228600 | 0.09278400 | 0.09326000 | 0.09363800 | 0.09382600 | 0.09373200 | 0.09336600 | 0.09284400 | 0.09225800 |
| 0.10205700 | 0.10213000 | 0.10227500 | 0.10252200 | 0.10287500 | 0.10333800 | 0.10391100 | 0.10452500 | 0.10502800 | 0.10525400 | 0.10510000 | 0.10459700 | 0.10390100 | 0.10318600 |
| 0.09608000 | 0.09601200 | 0.09603400 | 0.09618500 | 0.09650100 | 0.09702100 | 0.09766700 | 0.09826100 | 0.09866000 | 0.09880000 | 0.09865500 | 0.09823600 | 0.09763100 | 0.09697600 |
| 0.11136900 | 0.11137300 | 0.11145800 | 0.11170000 | 0.11210700 | 0.11265100 | 0.11330000 | 0.11395200 | 0.11444400 | 0.11464600 | 0.11448300 | 0.11398300 | 0.11330100 | 0.11261900 |
| 0.10182100 | 0.10176300 | 0.10183700 | 0.10209700 | 0.10250800 | 0.10303000 | 0.10365500 | 0.10429600 | 0.10477000 | 0.10493400 | 0.10476700 | 0.10432400 | 0.10367700 | 0.10295900 |
| 0.09098800 | 0.09092900 | 0.09099300 | 0.09126600 | 0.09168100 | 0.09215400 | 0.09267300 | 0.09320700 | 0.09365700 | 0.09388300 | 0.09375500 | 0.09325000 | 0.09251900 | 0.09180200 |
| 0.05226300 | 0.05230200 | 0.05238900 | 0.05250100 | 0.05261300 | 0.05275000 | 0.05294900 | 0.05319800 | 0.05342200 | 0.05352000 | 0.05345400 | 0.05324400 | 0.05291500 | 0.05252400 |
| 0.05773700 | 0.05773800 | 0.05782500 | 0.05796400 | 0.05814900 | 0.05839700 | 0.05868600 | 0.05899400 | 0.05930300 | 0.05952900 | 0.05954000 | 0.05929300 | 0.05888900 | 0.05845500 |
| 0.07395100 | 0.07393000 | 0.07398300 | 0.07416500 | 0.07449700 | 0.07492900 | 0.07534600 | 0.07568900 | 0.07596100 | 0.07610000 | 0.07600300 | 0.07566400 | 0.07520700 | 0.07475900 |

| 5104       | 5106       | 5108       | 5110       | 5112       | 5114       | 5116       | 5118       | 5120       | 5121       | 5123       | 5125       | 5127       | 5129       |
|------------|------------|------------|------------|------------|------------|------------|------------|------------|------------|------------|------------|------------|------------|
| 0.11226300 | 0.11179700 | 0.11146900 | 0.11125600 | 0.11113900 | 0.11104500 | 0.11093400 | 0.11089600 | 0.11101000 | 0.11120500 | 0.11139600 | 0.11161700 | 0.11192000 | 0.11221500 |
| 0.10131800 | 0.10080400 | 0.10050800 | 0.10035900 | 0.10028800 | 0.10024600 | 0.10021900 | 0.10024900 | 0.10036100 | 0.10053100 | 0.10076100 | 0.10106800 | 0.10138600 | 0.10160500 |
| 0.11718500 | 0.11667200 | 0.11627500 | 0.11598900 | 0.11584000 | 0.11578800 | 0.11574400 | 0.11574300 | 0.11589500 | 0.11617500 | 0.11647600 | 0.11677400 | 0.11703100 | 0.11712700 |
| 0.11329000 | 0.11282000 | 0.11252300 | 0.11232900 | 0.11219500 | 0.11209700 | 0.11201500 | 0.11201100 | 0.11219500 | 0.11252900 | 0.11283200 | 0.11301100 | 0.11311000 | 0.11314500 |
| 0.07320500 | 0.07287400 | 0.07274800 | 0.07272400 | 0.07267900 | 0.07253700 | 0.07233300 | 0.07225200 | 0.07243300 | 0.07276800 | 0.07305200 | 0.07321900 | 0.07329500 | 0.07326600 |
| 0.11127900 | 0.11087400 | 0.11059100 | 0.11036400 | 0.11017500 | 0.11002500 | 0.10989000 | 0.10981200 | 0.10989700 | 0.11015500 | 0.11046800 | 0.11072500 | 0.11089900 | 0.11099100 |
| 0.11161700 | 0.11112400 | 0.11079900 | 0.11061200 | 0.11051600 | 0.11042200 | 0.11029700 | 0.11028700 | 0.11055300 | 0.11100700 | 0.11142800 | 0.11173400 | 0.11193700 | 0.11201100 |
| 0.09167600 | 0.09119800 | 0.09087600 | 0.09065400 | 0.09048100 | 0.09035600 | 0.09026500 | 0.09023500 | 0.09034900 | 0.09061000 | 0.09090400 | 0.09112900 | 0.09127100 | 0.09135800 |
| 0.10254700 | 0.10204500 | 0.10170300 | 0.10145900 | 0.10125100 | 0.10110200 | 0.10104700 | 0.10113600 | 0.10139900 | 0.10172300 | 0.10196300 | 0.10215000 | 0.10236200 | 0.10254300 |
| 0.09638100 | 0.09590300 | 0.09555700 | 0.09532000 | 0.09515200 | 0.09502600 | 0.09495600 | 0.09503100 | 0.09529600 | 0.09563000 | 0.09589500 | 0.09608300 | 0.09622800 | 0.09630100 |
| 0.11202400 | 0.11152900 | 0.11114600 | 0.11088900 | 0.11073200 | 0.11061800 | 0.11051200 | 0.11048600 | 0.11066000 | 0.11099000 | 0.11132000 | 0.11158300 | 0.11176200 | 0.11181000 |
| 0.10233900 | 0.10188900 | 0.10158600 | 0.10139300 | 0.10126400 | 0.10113500 | 0.10099200 | 0.10094100 | 0.10109300 | 0.10141200 | 0.10177700 | 0.10212300 | 0.10240400 | 0.10253000 |
| 0.09126900 | 0.09094000 | 0.09073600 | 0.09057800 | 0.09044900 | 0.09032400 | 0.09016600 | 0.09007100 | 0.09020200 | 0.09051200 | 0.09080800 | 0.09103100 | 0.09120800 | 0.09130700 |
| 0.05216900 | 0.05191100 | 0.05175700 | 0.05167700 | 0.05160800 | 0.05149400 | 0.05136100 | 0.05132500 | 0.05146500 | 0.05169400 | 0.05185900 | 0.05194100 | 0.05200800 | 0.05204100 |
| 0.05803700 | 0.05764600 | 0.05734200 | 0.05718100 | 0.05712200 | 0.05706700 | 0.05699300 | 0.05699200 | 0.05715500 | 0.05742500 | 0.05767900 | 0.05786300 | 0.05796200 | 0.05794600 |
| 0.07435100 | 0.07399200 | 0.07372500 | 0.07355200 | 0.07343200 | 0.07333900 | 0.07325000 | 0.07318500 | 0.07325400 | 0.07350700 | 0.07382400 | 0.07405500 | 0.07415000 | 0.07415300 |

| 5131       | 5133       | 5135       | 5137       | 5139       | 5141       | 5143       | 5145       | 5147       | 5148       | 5150       | 5152       | 5154       | 5156       |
|------------|------------|------------|------------|------------|------------|------------|------------|------------|------------|------------|------------|------------|------------|
| 0.11235400 | 0.11234800 | 0.11232400 | 0.11231600 | 0.11225600 | 0.11211300 | 0.11195000 | 0.11183200 | 0.11176300 | 0.11174700 | 0.11180000 | 0.11188300 | 0.11196500 | 0.11209600 |
| 0.10167300 | 0.10161900 | 0.10152000 | 0.10142000 | 0.10132100 | 0.10123300 | 0.10118600 | 0.10117600 | 0.10118300 | 0.10119600 | 0.10120000 | 0.10119500 | 0.10124000 | 0.10138800 |
| 0.11703700 | 0.11693900 | 0.11695900 | 0.11694800 | 0.11675200 | 0.11652900 | 0.11651700 | 0.11664600 | 0.11671100 | 0.11667700 | 0.11656700 | 0.11628700 | 0.11594300 | 0.11592200 |
| 0.11311700 | 0.11310700 | 0.11316100 | 0.11316200 | 0.11298400 | 0.11275400 | 0.11273000 | 0.11289800 | 0.11297800 | 0.11285600 | 0.11263900 | 0.11236600 | 0.11212500 | 0.11219100 |
| 0.07316000 | 0.07310300 | 0.07314200 | 0.07312000 | 0.07292100 | 0.07273400 | 0.07278500 | 0.07295900 | 0.07299300 | 0.07285400 | 0.07265800 | 0.07241800 | 0.07219300 | 0.07222400 |
| 0.11101700 | 0.11104200 | 0.11110000 | 0.11108100 | 0.11087700 | 0.11063400 | 0.11060100 | 0.11075900 | 0.11087500 | 0.11083000 | 0.11066800 | 0.11041800 | 0.11019400 | 0.11025700 |
| 0.11199000 | 0.11199400 | 0.11204100 | 0.11195700 | 0.11163900 | 0.11129900 | 0.11122100 | 0.11134400 | 0.11139300 | 0.11129100 | 0.11114300 | 0.11095400 | 0.11075100 | 0.11077800 |
| 0.09140600 | 0.09143900 | 0.09146300 | 0.09138100 | 0.09113700 | 0.09092000 | 0.09094900 | 0.09112800 | 0.09118300 | 0.09103000 | 0.09078700 | 0.09049800 | 0.09023600 | 0.09024500 |
| 0.10259200 | 0.10256200 | 0.10257400 | 0.10256100 | 0.10236000 | 0.10206900 | 0.10197200 | 0.10209500 | 0.10219200 | 0.10213900 | 0.10197800 | 0.10170900 | 0.10144400 | 0.10149800 |
| 0.09628200 | 0.09625100 | 0.09627300 | 0.09623700 | 0.09602300 | 0.09578500 | 0.09577200 | 0.09593400 | 0.09601000 | 0.09592300 | 0.09577100 | 0.09557100 | 0.09536600 | 0.09538300 |
| 0.11176500 | 0.11175900 | 0.11182200 | 0.11180800 | 0.11163500 | 0.11146600 | 0.11149000 | 0.11164100 | 0.11169900 | 0.11159300 | 0.11141600 | 0.11120400 | 0.11101300 | 0.11106000 |
| 0.10248400 | 0.10239200 | 0.10235700 | 0.10229000 | 0.10208400 | 0.10186700 | 0.10183600 | 0.10193200 | 0.10194900 | 0.10186300 | 0.10175600 | 0.10158200 | 0.10138300 | 0.10142700 |
| 0.09133700 | 0.09139200 | 0.09147200 | 0.09141500 | 0.09114100 | 0.09087300 | 0.09087600 | 0.09106000 | 0.09112800 | 0.09100900 | 0.09082800 | 0.09059700 | 0.09035700 | 0.09036500 |
| 0.05201400 | 0.05200500 | 0.05204500 | 0.05200300 | 0.05179100 | 0.05158200 | 0.05160000 | 0.05176500 | 0.05181100 | 0.05166900 | 0.05146100 | 0.05122600 | 0.05100000 | 0.05099500 |
| 0.05784300 | 0.05775200 | 0.05772000 | 0.05763000 | 0.05738300 | 0.05717000 | 0.05723200 | 0.05746200 | 0.05756200 | 0.05746300 | 0.05729200 | 0.05708700 | 0.05686800 | 0.05682700 |
| 0.07414400 | 0.07418800 | 0.07424800 | 0.07418100 | 0.07392100 | 0.07367000 | 0.07366300 | 0.07380500 | 0.07383600 | 0.07372700 | 0.07357800 | 0.07337500 | 0.07319400 | 0.07328900 |

| 5158       | 5160       | 5162       | 5164       | 5166       | 5168       | 5170       | 5172       | 5174       | 5175       | 5177       | 5179       | 5181       | 5183       |
|------------|------------|------------|------------|------------|------------|------------|------------|------------|------------|------------|------------|------------|------------|
| 0.11229900 | 0.11250400 | 0.11266100 | 0.11279000 | 0.11288300 | 0.11289200 | 0.11281900 | 0.11272100 | 0.11260200 | 0.11242300 | 0.11221100 | 0.11203600 | 0.11189000 | 0.11173000 |
| 0.10159000 | 0.10176200 | 0.10190100 | 0.10203700 | 0.10214200 | 0.10216400 | 0.10211600 | 0.10204800 | 0.10196200 | 0.10180500 | 0.10157100 | 0.10131800 | 0.10107200 | 0.10084600 |
| 0.11626900 | 0.11656600 | 0.11671700 | 0.11699900 | 0.11728400 | 0.11724300 | 0.11707500 | 0.11710700 | 0.11716200 | 0.11696600 | 0.11660200 | 0.11620300 | 0.11565000 | 0.11499700 |
| 0.11254600 | 0.11278500 | 0.11285800 | 0.11309800 | 0.11341600 | 0.11345700 | 0.11334400 | 0.11333300 | 0.11326400 | 0.11297800 | 0.11263500 | 0.11233700 | 0.11189600 | 0.11132600 |
| 0.07250500 | 0.07267800 | 0.07270500 | 0.07290900 | 0.07317700 | 0.07313700 | 0.07296200 | 0.07299300 | 0.07305200 | 0.07288700 | 0.07262700 | 0.07238400 | 0.07194900 | 0.07134000 |
| 0.11056200 | 0.11073300 | 0.11077200 | 0.11104100 | 0.11139900 | 0.11139500 | 0.11116400 | 0.11109400 | 0.11109500 | 0.11092000 | 0.11062800 | 0.11029800 | 0.10978500 | 0.10916100 |
| 0.11107400 | 0.11132300 | 0.11150300 | 0.11187700 | 0.11223400 | 0.11217200 | 0.11190800 | 0.11184500 | 0.11185000 | 0.11163400 | 0.11126900 | 0.11088900 | 0.11037300 | 0.10978200 |
| 0.09052300 | 0.09073100 | 0.09084800 | 0.09114500 | 0.09146500 | 0.09145900 | 0.09130600 | 0.09132600 | 0.09138200 | 0.09122500 | 0.09090700 | 0.09052600 | 0.08996700 | 0.08932600 |
| 0.10186000 | 0.10212000 | 0.10224000 | 0.10255400 | 0.10293500 | 0.10296700 | 0.10276800 | 0.10270400 | 0.10270000 | 0.10250700 | 0.10214600 | 0.10172600 | 0.10117900 | 0.10060700 |
| 0.09562300 | 0.09577000 | 0.09583700 | 0.09613500 | 0.09650600 | 0.09655400 | 0.09642100 | 0.09643700 | 0.09646900 | 0.09626700 | 0.09591000 | 0.09554000 | 0.09506600 | 0.09453600 |
| 0.11134100 | 0.11153000 | 0.11163300 | 0.11196900 | 0.11234600 | 0.11231800 | 0.11207900 | 0.11203700 | 0.11205500 | 0.11187400 | 0.11158300 | 0.11126000 | 0.11072800 | 0.11007900 |
| 0.10169800 | 0.10184800 | 0.10191600 | 0.10224300 | 0.10265600 | 0.10273400 | 0.10259200 | 0.10254500 | 0.10249000 | 0.10223700 | 0.10188700 | 0.10154900 | 0.10107700 | 0.10048300 |
| 0.09063900 | 0.09084800 | 0.09098500 | 0.09134300 | 0.09174400 | 0.09178300 | 0.09161600 | 0.09160100 | 0.09162100 | 0.09141800 | 0.09108300 | 0.09076200 | 0.09032500 | 0.08978100 |
| 0.05121800 | 0.05134500 | 0.05136600 | 0.05159900 | 0.05192400 | 0.05194800 | 0.05178100 | 0.05175000 | 0.05176900 | 0.05161600 | 0.05136300 | 0.05110300 | 0.05068100 | 0.05016200 |
| 0.05697600 | 0.05704100 | 0.05705600 | 0.05735300 | 0.05776500 | 0.05785100 | 0.05773400 | 0.05774800 | 0.05776700 | 0.05759900 | 0.05736800 | 0.05714400 | 0.05671100 | 0.05611000 |
| 0.07359100 | 0.07372600 | 0.07373000 | 0.07394900 | 0.07424200 | 0.07424500 | 0.07411700 | 0.07415100 | 0.07419300 | 0.07403100 | 0.07374900 | 0.07343000 | 0.07295400 | 0.07242400 |

| 5185       | 5187       | 5189       | 5191       | 5193       | 5195       | 5197       | 5199       | 5201       | 5202       | 5204       | 5206       | 5208       | 5210       |
|------------|------------|------------|------------|------------|------------|------------|------------|------------|------------|------------|------------|------------|------------|
| 0.11158100 | 0.11147200 | 0.11140600 | 0.11138100 | 0.11134500 | 0.11128200 | 0.11130800 | 0.11146600 | 0.11158700 | 0.11150200 | 0.11124500 | 0.11109400 | 0.11123100 | 0.11146100 |
| 0.10070700 | 0.10067200 | 0.10068000 | 0.10069400 | 0.10065400 | 0.10053900 | 0.10049300 | 0.10061200 | 0.10069600 | 0.10047700 | 0.10001800 | 0.09977000 | 0.09998200 | 0.10033700 |
| 0.11468800 | 0.11491700 | 0.11544500 | 0.11585400 | 0.11564700 | 0.11498200 | 0.11486600 | 0.11552300 | 0.11569500 | 0.11429200 | 0.11195200 | 0.11098500 | 0.11251800 | 0.11483300 |
| 0.11105400 | 0.11127600 | 0.11176000 | 0.11209100 | 0.11179300 | 0.11106000 | 0.11091700 | 0.11158900 | 0.11178400 | 0.11038700 | 0.10806200 | 0.10714500 | 0.10870900 | 0.11099500 |
| 0.07104200 | 0.07127600 | 0.07178600 | 0.07217800 | 0.07199900 | 0.07135800 | 0.07120400 | 0.07183500 | 0.07206600 | 0.07075400 | 0.06845400 | 0.06746900 | 0.06895100 | 0.07120000 |
| 0.10887800 | 0.10910800 | 0.10961100 | 0.11000100 | 0.10978000 | 0.10907300 | 0.10889300 | 0.10953900 | 0.10977200 | 0.10843700 | 0.10614300 | 0.10523500 | 0.10682300 | 0.10913900 |
| 0.10954200 | 0.10978000 | 0.11022300 | 0.11051800 | 0.11024400 | 0.10955300 | 0.10941700 | 0.11008000 | 0.11028400 | 0.10888600 | 0.10651100 | 0.10552400 | 0.10705100 | 0.10932200 |
| 0.08904900 | 0.08928200 | 0.08977400 | 0.09015800 | 0.08996500 | 0.08931700 | 0.08918300 | 0.08981900 | 0.09002000 | 0.08869300 | 0.08643500 | 0.08550400 | 0.08698500 | 0.08919800 |
| 0.10040800 | 0.10066600 | 0.10111100 | 0.10142700 | 0.10119400 | 0.10052100 | 0.10040100 | 0.10113800 | 0.10146700 | 0.10017000 | 0.09780400 | 0.09673600 | 0.09819300 | 0.10046800 |
| 0.09431400 | 0.09452300 | 0.09495200 | 0.09527900 | 0.09506700 | 0.09445100 | 0.09437700 | 0.09504500 | 0.09523900 | 0.09391000 | 0.09166400 | 0.09074600 | 0.09225100 | 0.09449300 |
| 0.10978300 | 0.10999400 | 0.11044800 | 0.11077100 | 0.11052800 | 0.10989500 | 0.10983800 | 0.11053600 | 0.11073700 | 0.10940100 | 0.10718100 | 0.10628100 | 0.10773100 | 0.10988200 |
| 0.10016200 | 0.10032200 | 0.10078000 | 0.10116500 | 0.10098500 | 0.10034300 | 0.10020700 | 0.10086300 | 0.10110200 | 0.09980600 | 0.09757600 | 0.09668300 | 0.09817800 | 0.10033700 |
| 0.08951900 | 0.08972000 | 0.09021500 | 0.09064900 | 0.09051900 | 0.08991900 | 0.08980600 | 0.09044100 | 0.09063100 | 0.08927800 | 0.08697600 | 0.08603000 | 0.08754500 | 0.08976500 |
| 0.04999100 | 0.05030400 | 0.05082300 | 0.05118600 | 0.05096200 | 0.05028500 | 0.05011500 | 0.05071300 | 0.05088200 | 0.04953700 | 0.04729700 | 0.04643000 | 0.04798600 | 0.05023000 |
| 0.05581700 | 0.05604000 | 0.05654300 | 0.05693000 | 0.05672800 | 0.05608600 | 0.05597300 | 0.05660800 | 0.05678700 | 0.05547000 | 0.05329000 | 0.05246100 | 0.05399400 | 0.05619000 |
| 0.07226700 | 0.07255700 | 0.07300600 | 0.07332200 | 0.07314700 | 0.07258600 | 0.07250700 | 0.07314900 | 0.07333800 | 0.07197600 | 0.06965700 | 0.06869000 | 0.07018000 | 0.07240800 |

| 5212       | 5214       | 5216       | 5218       | 5220       | 5222       | 5224       | 5226       | 5228       | 5229       | 5231       | 5233       | 5235       | 5237       |
|------------|------------|------------|------------|------------|------------|------------|------------|------------|------------|------------|------------|------------|------------|
| 0.11158200 | 0.11156900 | 0.11144600 | 0.11127500 | 0.11107800 | 0.11075500 | 0.11034300 | 0.11010400 | 0.11009400 | 0.11013300 | 0.11020900 | 0.11040600 | 0.11067900 | 0.11096400 |
| 0.10054200 | 0.10057300 | 0.10050400 | 0.10041900 | 0.10029600 | 0.09999900 | 0.09957500 | 0.09929800 | 0.09920300 | 0.09911300 | 0.09907300 | 0.09921700 | 0.09948000 | 0.09973300 |
| 0.11610100 | 0.11599400 | 0.11526300 | 0.11481300 | 0.11448400 | 0.11342200 | 0.11206200 | 0.11182100 | 0.11248100 | 0.11293100 | 0.11335200 | 0.11419800 | 0.11506400 | 0.11552100 |
| 0.11223700 | 0.11217600 | 0.11151100 | 0.11106800 | 0.11072700 | 0.10968000 | 0.10832600 | 0.10807100 | 0.10870800 | 0.10910800 | 0.10946600 | 0.11029000 | 0.11118300 | 0.11167500 |
| 0.07245000 | 0.07242500 | 0.07181500 | 0.07141700 | 0.07108200 | 0.07004300 | 0.06878300 | 0.06869800 | 0.06947600 | 0.06991900 | 0.07023300 | 0.07098000 | 0.07181500 | 0.07227800 |
| 0.11039700 | 0.11031300 | 0.10957900 | 0.10906900 | 0.10870200 | 0.10763400 | 0.10623200 | 0.10592200 | 0.10652500 | 0.10693500 | 0.10735100 | 0.10823700 | 0.10915700 | 0.10965400 |
| 0.11053800 | 0.11043700 | 0.10975000 | 0.10932300 | 0.10899500 | 0.10793200 | 0.10656600 | 0.10630100 | 0.10689700 | 0.10724900 | 0.10757600 | 0.10836400 | 0.10921000 | 0.10965400 |
| 0.09041200 | 0.09034100 | 0.08966800 | 0.08921100 | 0.08883600 | 0.08778400 | 0.08649800 | 0.08630800 | 0.08695700 | 0.08735000 | 0.08767800 | 0.08845300 | 0.08932800 | 0.08983000 |
| 0.10173500 | 0.10169800 | 0.10105100 | 0.10058800 | 0.10018400 | 0.09909500 | 0.09774600 | 0.09749400 | 0.09810600 | 0.09846300 | 0.09877300 | 0.09956800 | 0.10048800 | 0.10107400 |
| 0.09571300 | 0.09563000 | 0.09494500 | 0.09449200 | 0.09414900 | 0.09312500 | 0.09184200 | 0.09167600 | 0.09235700 | 0.09272200 | 0.09298500 | 0.09372400 | 0.09460800 | 0.09517000 |
| 0.11101700 | 0.11086600 | 0.11015100 | 0.10969200 | 0.10934400 | 0.10835100 | 0.10713100 | 0.10696900 | 0.10757800 | 0.10789600 | 0.10817700 | 0.10893600 | 0.10981000 | 0.11036700 |
| 0.10144900 | 0.10128100 | 0.10053300 | 0.10003600 | 0.09969900 | 0.09873400 | 0.09748100 | 0.09723700 | 0.09780100 | 0.09816600 | 0.09857500 | 0.09947100 | 0.10040300 | 0.10092600 |
| 0.09091800 | 0.09078100 | 0.09009200 | 0.08965000 | 0.08928300 | 0.08819200 | 0.08680900 | 0.08653800 | 0.08716900 | 0.08758200 | 0.08796100 | 0.08879500 | 0.08970300 | 0.09022600 |
| 0.05141300 | 0.05128100 | 0.05057600 | 0.05016100 | 0.04990400 | 0.04899300 | 0.04781900 | 0.04770200 | 0.04837700 | 0.04875000 | 0.04904500 | 0.04977000 | 0.05057500 | 0.05104500 |
| 0.05734200 | 0.05720400 | 0.05649000 | 0.05603600 | 0.05573300 | 0.05482500 | 0.05369700 | 0.05358000 | 0.05418800 | 0.05452500 | 0.05487200 | 0.05571400 | 0.05662100 | 0.05708900 |
| 0.07363900 | 0.07362000 | 0.07301200 | 0.07258500 | 0.07224400 | 0.07127900 | 0.07009400 | 0.06996100 | 0.07059400 | 0.07091400 | 0.07117400 | 0.07192000 | 0.07277800 | 0.07327400 |

| 5239       | 5241       | 5243       | 5245       | 5247       | 5249       | 5251       | 5253       | 5255       | 5256       | 5258       | 5260       | 5262       | 5264       |
|------------|------------|------------|------------|------------|------------|------------|------------|------------|------------|------------|------------|------------|------------|
| 0.11120400 | 0.11129400 | 0.11122600 | 0.11119900 | 0.11143600 | 0.11188300 | 0.11220600 | 0.11222800 | 0.11216700 | 0.11223000 | 0.11225400 | 0.11210800 | 0.11200100 | 0.11218400 |
| 0.09989500 | 0.09990700 | 0.09983100 | 0.09986100 | 0.10013400 | 0.10056000 | 0.10083300 | 0.10079800 | 0.10069900 | 0.10075900 | 0.10079100 | 0.10064600 | 0.10054300 | 0.10074000 |
| 0.11531100 | 0.11412900 | 0.11236300 | 0.11124800 | 0.11179100 | 0.11354100 | 0.11472400 | 0.11465200 | 0.11465100 | 0.11526500 | 0.11510400 | 0.11365000 | 0.11243800 | 0.11291200 |
| 0.11148400 | 0.11031300 | 0.10854700 | 0.10741100 | 0.10792200 | 0.10965600 | 0.11084600 | 0.11078000 | 0.11077700 | 0.11143200 | 0.11136100 | 0.11000800 | 0.10888100 | 0.10940600 |
| 0.07204700 | 0.07077400 | 0.06884800 | 0.06754900 | 0.06793400 | 0.06961100 | 0.07082300 | 0.07082300 | 0.07089200 | 0.07157400 | 0.07143100 | 0.06992400 | 0.06863300 | 0.06904400 |
| 0.10948900 | 0.10837500 | 0.10665500 | 0.10551200 | 0.10598600 | 0.10768200 | 0.10882600 | 0.10872600 | 0.10875500 | 0.10945700 | 0.10932200 | 0.10778800 | 0.10652300 | 0.10706900 |
| 0.10941800 | 0.10823700 | 0.10652100 | 0.10544500 | 0.10598800 | 0.10774100 | 0.10895000 | 0.10890700 | 0.10893800 | 0.10956800 | 0.10935200 | 0.10780300 | 0.10656600 | 0.10709400 |
| 0.08963300 | 0.08844300 | 0.08666600 | 0.08550900 | 0.08596700 | 0.08763800 | 0.08880100 | 0.08876600 | 0.08884000 | 0.08955400 | 0.08948500 | 0.08810000 | 0.08694400 | 0.08743500 |
| 0.10100300 | 0.09991200 | 0.09816100 | 0.09700100 | 0.09748800 | 0.09922800 | 0.10044800 | 0.10039900 | 0.10039600 | 0.10103200 | 0.10090100 | 0.09947200 | 0.09833000 | 0.09889300 |
| 0.09507100 | 0.09396100 | 0.09221500 | 0.09103900 | 0.09144300 | 0.09308500 | 0.09427800 | 0.09427000 | 0.09431900 | 0.09500000 | 0.09489900 | 0.09341000 | 0.09208600 | 0.09245800 |
| 0.11029600 | 0.10923600 | 0.10755300 | 0.10646200 | 0.10690500 | 0.10846300 | 0.10954400 | 0.10953700 | 0.10965200 | 0.11034000 | 0.11022200 | 0.10881400 | 0.10765100 | 0.10812900 |
| 0.10080400 | 0.09972700 | 0.09802300 | 0.09685300 | 0.09723800 | 0.09885200 | 0.10002800 | 0.10004600 | 0.10013300 | 0.10081600 | 0.10073000 | 0.09934800 | 0.09817800 | 0.09864000 |
| 0.09005800 | 0.08891600 | 0.08721500 | 0.08615300 | 0.08669100 | 0.08839200 | 0.08952700 | 0.08939700 | 0.08930000 | 0.08984700 | 0.08971400 | 0.08835100 | 0.08722000 | 0.08771800 |
| 0.05088000 | 0.04972400 | 0.04791600 | 0.04666100 | 0.04699700 | 0.04858500 | 0.04975100 | 0.04977700 | 0.04988700 | 0.05058500 | 0.05047400 | 0.04901700 | 0.04773200 | 0.04805900 |
| 0.05680600 | 0.05551100 | 0.05366800 | 0.05252200 | 0.05301200 | 0.05466300 | 0.05578900 | 0.05575100 | 0.05579500 | 0.05639900 | 0.05619500 | 0.05472100 | 0.05354300 | 0.05403900 |
| 0.07312100 | 0.07201800 | 0.07029300 | 0.06910100 | 0.06947000 | 0.07107400 | 0.07222200 | 0.07218000 | 0.07221400 | 0.07289300 | 0.07280600 | 0.07137300 | 0.07013800 | 0.07058200 |

| 5266       | 5268       | 5270       | 5272       | 5274       | 5276       | 5278       | 5280       | 5282       | 5283       | 5285       | 5287       | 5289       | 5291       |
|------------|------------|------------|------------|------------|------------|------------|------------|------------|------------|------------|------------|------------|------------|
| 0.11255700 | 0.11292600 | 0.11327300 | 0.11363000 | 0.11397600 | 0.11429600 | 0.11462700 | 0.11503400 | 0.11549700 | 0.11589000 | 0.11603600 | 0.11578300 | 0.11519100 | 0.11454700 |
| 0.10110800 | 0.10145000 | 0.10178200 | 0.10213700 | 0.10247400 | 0.10279700 | 0.10314100 | 0.10350000 | 0.10383700 | 0.10412300 | 0.10423800 | 0.10396200 | 0.10331800 | 0.10264300 |
| 0.11444600 | 0.11597900 | 0.11735100 | 0.11847100 | 0.11905700 | 0.11910600 | 0.11891700 | 0.11881800 | 0.11891000 | 0.11913600 | 0.11917600 | 0.11857400 | 0.11783700 | 0.11794600 |
| 0.11092600 | 0.11237300 | 0.11363000 | 0.11471100 | 0.11539000 | 0.11554800 | 0.11537000 | 0.11523700 | 0.11533500 | 0.11559900 | 0.11566800 | 0.11504100 | 0.11420500 | 0.11422400 |
| 0.07052600 | 0.07198600 | 0.07324100 | 0.07422000 | 0.07467800 | 0.07459300 | 0.07422200 | 0.07389600 | 0.07374200 | 0.07375900 | 0.07375000 | 0.07329600 | 0.07279400 | 0.07311900 |
| 0.10869600 | 0.11023800 | 0.11157600 | 0.11269000 | 0.11329600 | 0.11333200 | 0.11308500 | 0.11295100 | 0.11307300 | 0.11332800 | 0.11335900 | 0.11275000 | 0.11201100 | 0.11209200 |
| 0.10866000 | 0.11017700 | 0.11151700 | 0.11262100 | 0.11320600 | 0.11322200 | 0.11295000 | 0.11278400 | 0.11288600 | 0.11318200 | 0.11329800 | 0.11268400 | 0.11181100 | 0.11179900 |
| 0.08890000 | 0.09029400 | 0.09153700 | 0.09261500 | 0.09321400 | 0.09322000 | 0.09290800 | 0.09268400 | 0.09270200 | 0.09290200 | 0.09296500 | 0.09240000 | 0.09167800 | 0.09183800 |
| 0.10042800 | 0.10186300 | 0.10313600 | 0.10424400 | 0.10490200 | 0.10502500 | 0.10485400 | 0.10473500 | 0.10479900 | 0.10500400 | 0.10506300 | 0.10450900 | 0.10378500 | 0.10386200 |
| 0.09390500 | 0.09536000 | 0.09669800 | 0.09783500 | 0.09844200 | 0.09847100 | 0.09823200 | 0.09810300 | 0.09818600 | 0.09839000 | 0.09840400 | 0.09777900 | 0.09699900 | 0.09708300 |
| 0.10958900 | 0.11101000 | 0.11230500 | 0.11343300 | 0.11411800 | 0.11428600 | 0.11416000 | 0.11410100 | 0.11429000 | 0.11463800 | 0.11474600 | 0.11412600 | 0.11327900 | 0.11323300 |
| 0.10010600 | 0.10153700 | 0.10281700 | 0.10392200 | 0.10458300 | 0.10470000 | 0.10450900 | 0.10440200 | 0.10454100 | 0.10485200 | 0.10497100 | 0.10437100 | 0.10349700 | 0.10343600 |
| 0.08920200 | 0.09061700 | 0.09185700 | 0.09291500 | 0.09352400 | 0.09359100 | 0.09333500 | 0.09314100 | 0.09320400 | 0.09345700 | 0.09352300 | 0.09292300 | 0.09216300 | 0.09224100 |
| 0.04939200 | 0.05073200 | 0.05197600 | 0.05302300 | 0.05351800 | 0.05336900 | 0.05286800 | 0.05243400 | 0.05223600 | 0.05223800 | 0.05219000 | 0.05171500 | 0.05127800 | 0.05172800 |
| 0.05549300 | 0.05685200 | 0.05800700 | 0.05893100 | 0.05936300 | 0.05922700 | 0.05877300 | 0.05839400 | 0.05826300 | 0.05831400 | 0.05823500 | 0.05765200 | 0.05712400 | 0.05756600 |
| 0.07203100 | 0.07338000 | 0.07452800 | 0.07547500 | 0.07596500 | 0.07594700 | 0.07566100 | 0.07540300 | 0.07530400 | 0.07537300 | 0.07534900 | 0.07477500 | 0.07410700 | 0.07432700 |



| 5293       | 5295       | 5297       | 5299       | 5301       | 5303       | 5305       | 5307       | 5309       | 5310       | 5312       | 5314       | 5316       | 5318       |
|------------|------------|------------|------------|------------|------------|------------|------------|------------|------------|------------|------------|------------|------------|
| 0.11399200 | 0.11346000 | 0.11293200 | 0.11248500 | 0.11221300 | 0.11209100 | 0.11201800 | 0.11201100 | 0.11211000 | 0.11219200 | 0.11217600 | 0.11216200 | 0.11226800 | 0.11250900 |
| 0.10208400 | 0.10151900 | 0.10093000 | 0.10046500 | 0.10024300 | 0.10017200 | 0.10009800 | 0.10008100 | 0.10021100 | 0.10034200 | 0.10036300 | 0.10037300 | 0.10049200 | 0.10069700 |
| 0.11843900 | 0.11828500 | 0.11752500 | 0.11687700 | 0.11662300 | 0.11622900 | 0.11539300 | 0.11503500 | 0.11586300 | 0.11690400 | 0.11713900 | 0.11687100 | 0.11688200 | 0.11731800 |
| 0.11472200 | 0.11461500 | 0.11383800 | 0.11312700 | 0.11286300 | 0.11252500 | 0.11173800 | 0.11137900 | 0.11217900 | 0.11319300 | 0.11341200 | 0.11318100 | 0.11332200 | 0.11389200 |
| 0.07380300 | 0.07381200 | 0.07314700 | 0.07254200 | 0.07235800 | 0.07208700 | 0.07135900 | 0.07100800 | 0.07175300 | 0.07269000 | 0.07285900 | 0.07261800 | 0.07274300 | 0.07325600 |
| 0.11255300 | 0.11236900 | 0.11155100 | 0.11085100 | 0.11060100 | 0.11023800 | 0.10941300 | 0.10903300 | 0.10983100 | 0.11088400 | 0.11118600 | 0.11100100 | 0.11109400 | 0.11159700 |
| 0.11232000 | 0.11224200 | 0.11144600 | 0.11068100 | 0.11036000 | 0.10999500 | 0.10924300 | 0.10893200 | 0.10971000 | 0.11065200 | 0.11084100 | 0.11064800 | 0.11081000 | 0.11133400 |
| 0.09248000 | 0.09249600 | 0.09181200 | 0.09116300 | 0.09093900 | 0.09065200 | 0.08993600 | 0.08960200 | 0.09032400 | 0.09121700 | 0.09136600 | 0.09111300 | 0.09118500 | 0.09162500 |
| 0.10432900 | 0.10416000 | 0.10334900 | 0.10262500 | 0.10235000 | 0.10202600 | 0.10129700 | 0.10097800 | 0.10172900 | 0.10265900 | 0.10286300 | 0.10266000 | 0.10277000 | 0.10329100 |
| 0.09764400 | 0.09762400 | 0.09695300 | 0.09628300 | 0.09597600 | 0.09561500 | 0.09487700 | 0.09453600 | 0.09525500 | 0.09618200 | 0.09639800 | 0.09621800 | 0.09637500 | 0.09690800 |
| 0.11363300 | 0.11345900 | 0.11268300 | 0.11200200 | 0.11173900 | 0.11139400 | 0.11065400 | 0.11036700 | 0.11119700 | 0.11221000 | 0.11243600 | 0.11219700 | 0.11228100 | 0.11278600 |
| 0.10390100 | 0.10383200 | 0.10311700 | 0.10242600 | 0.10214900 | 0.10183100 | 0.10109900 | 0.10076300 | 0.10155300 | 0.10256400 | 0.10277900 | 0.10252000 | 0.10261800 | 0.10314900 |
| 0.09275400 | 0.09269500 | 0.09203500 | 0.09141200 | 0.09113400 | 0.09075200 | 0.08999200 | 0.08968900 | 0.09043800 | 0.09130900 | 0.09146000 | 0.09128800 | 0.09146900 | 0.09198900 |
| 0.05253000 | 0.05260400 | 0.05194800 | 0.05134600 | 0.05118300 | 0.05093100 | 0.05022600 | 0.04988700 | 0.05060800 | 0.05156000 | 0.05182000 | 0.05162400 | 0.05167300 | 0.05209300 |
| 0.05841300 | 0.05854700 | 0.05795500 | 0.05738400 | 0.05717400 | 0.05681700 | 0.05604300 | 0.05574400 | 0.05655800 | 0.05751400 | 0.05767600 | 0.05741000 | 0.05746200 | 0.05788000 |
| 0.07500800 | 0.07504900 | 0.07439400 | 0.07379800 | 0.07363700 | 0.07336900 | 0.07262700 | 0.07230600 | 0.07311900 | 0.07410400 | 0.07429200 | 0.07402300 | 0.07403500 | 0.07441600 |

| 5320       | 5322       | 5324       | 5326       | 5328       | 5330       | 5332       | 5334       | 5336       | 5337       | 5339       | 5341       | 5343       | 5345       |
|------------|------------|------------|------------|------------|------------|------------|------------|------------|------------|------------|------------|------------|------------|
| 0.11281500 | 0.11305500 | 0.11315800 | 0.11330700 | 0.11378300 | 0.11452600 | 0.11522400 | 0.11560100 | 0.11557500 | 0.11541000 | 0.11530700 | 0.11505100 | 0.11467100 | 0.11463000 |
| 0.10090600 | 0.10106800 | 0.10116000 | 0.10132400 | 0.10179700 | 0.10252600 | 0.10320800 | 0.10354500 | 0.10343400 | 0.10318200 | 0.10305800 | 0.10282600 | 0.10249400 | 0.10253800 |
| 0.11769900 | 0.11741800 | 0.11631600 | 0.11534600 | 0.11566400 | 0.11683000 | 0.11754800 | 0.11694500 | 0.11526200 | 0.11433800 | 0.11468900 | 0.11439100 | 0.11349400 | 0.11404900 |
| 0.11427600 | 0.11388400 | 0.11268600 | 0.11171200 | 0.11208900 | 0.11330200 | 0.11401900 | 0.11335500 | 0.11157400 | 0.11062900 | 0.11111800 | 0.11098000 | 0.11012100 | 0.11063900 |
| 0.07358200 | 0.07314200 | 0.07182700 | 0.07062300 | 0.07069300 | 0.07159600 | 0.07208200 | 0.07130000 | 0.06946300 | 0.06848600 | 0.06901700 | 0.06900800 | 0.06827000 | 0.06882000 |
| 0.11199100 | 0.11165400 | 0.11046900 | 0.10946700 | 0.10981100 | 0.11098200 | 0.11164600 | 0.11091900 | 0.10906900 | 0.10809900 | 0.10860600 | 0.10847000 | 0.10758800 | 0.10811600 |
| 0.11169500 | 0.11134700 | 0.11016700 | 0.10912900 | 0.10942600 | 0.11061900 | 0.11136400 | 0.11072000 | 0.10894600 | 0.10799200 | 0.10841300 | 0.10818200 | 0.10730200 | 0.10785600 |
| 0.09192000 | 0.09152000 | 0.09032600 | 0.08932700 | 0.08966600 | 0.09082000 | 0.09145200 | 0.09072400 | 0.08896200 | 0.08811700 | 0.08869400 | 0.08860400 | 0.08775100 | 0.08819200 |
| 0.10373200 | 0.10347200 | 0.10235000 | 0.10134900 | 0.10165200 | 0.10280400 | 0.10351200 | 0.10290600 | 0.10121100 | 0.10031100 | 0.10078700 | 0.10062200 | 0.09974800 | 0.10027200 |
| 0.09728000 | 0.09694300 | 0.09581500 | 0.09484700 | 0.09513400 | 0.09621700 | 0.09685500 | 0.09618500 | 0.09441800 | 0.09344900 | 0.09390100 | 0.09377900 | 0.09295600 | 0.09345600 |
| 0.11315700 | 0.11280100 | 0.11168800 | 0.11083500 | 0.11128000 | 0.11246000 | 0.11313500 | 0.11249300 | 0.11076700 | 0.10983100 | 0.11027100 | 0.11011200 | 0.10927000 | 0.10973600 |
| 0.10352900 | 0.10316600 | 0.10199100 | 0.10100400 | 0.10132100 | 0.10246800 | 0.10317700 | 0.10256400 | 0.10085300 | 0.09997400 | 0.10050300 | 0.10040600 | 0.09959600 | 0.10011300 |
| 0.09236800 | 0.09206400 | 0.09089800 | 0.08980900 | 0.09001600 | 0.09109900 | 0.09173200 | 0.09104500 | 0.08934200 | 0.08853900 | 0.08911800 | 0.08900900 | 0.08819500 | 0.08876800 |
| 0.05240900 | 0.05201100 | 0.05074300 | 0.04957500 | 0.04966300 | 0.05054200 | 0.05095300 | 0.05010900 | 0.04832700 | 0.04748800 | 0.04806500 | 0.04797600 | 0.04712200 | 0.04757800 |
| 0.05816700 | 0.05778500 | 0.05663000 | 0.05561500 | 0.05576200 | 0.05657400 | 0.05687000 | 0.05590800 | 0.05403800 | 0.05318500 | 0.05380000 | 0.05378700 | 0.05307400 | 0.05364500 |
| 0.07470500 | 0.07432400 | 0.07311100 | 0.07203100 | 0.07224100 | 0.07324900 | 0.07376800 | 0.07300900 | 0.07125200 | 0.07032500 | 0.07076700 | 0.07061000 | 0.06979100 | 0.07035300 |

| 5347       | 5349       | 5351       | 5353       | 5355       | 5357       | 5359       | 5361       | 5363       | 5364       | 5366       | 5368       | 5370       | 5372       |
|------------|------------|------------|------------|------------|------------|------------|------------|------------|------------|------------|------------|------------|------------|
| 0.11495600 | 0.11525300 | 0.11542900 | 0.11580500 | 0.11657900 | 0.11745300 | 0.11809500 | 0.11843900 | 0.11860900 | 0.11875100 | 0.11888200 | 0.11895500 | 0.11893600 | 0.11879300 |
| 0.10297900 | 0.10334800 | 0.10350500 | 0.10383200 | 0.10461700 | 0.10551300 | 0.10612300 | 0.10641600 | 0.10658600 | 0.10679500 | 0.10700700 | 0.10710700 | 0.10705000 | 0.10686500 |
| 0.11566400 | 0.11624400 | 0.11559500 | 0.11590200 | 0.11846000 | 0.12133100 | 0.12259400 | 0.12246000 | 0.12225300 | 0.12276900 | 0.12358900 | 0.12388800 | 0.12315000 | 0.12136900 |
| 0.11225400 | 0.11286400 | 0.11223400 | 0.11255600 | 0.11514700 | 0.11808100 | 0.11942800 | 0.11933300 | 0.11906000 | 0.11946600 | 0.12023700 | 0.12055800 | 0.11987600 | 0.11816000 |
| 0.07040400 | 0.07094400 | 0.07016500 | 0.07023900 | 0.07256900 | 0.07531100 | 0.07653500 | 0.07635700 | 0.07602500 | 0.07638100 | 0.07712400 | 0.07746800 | 0.07682700 | 0.07508000 |
| 0.10980900 | 0.11052300 | 0.10995600 | 0.11025900 | 0.11276400 | 0.11558600 | 0.11684100 | 0.11672000 | 0.11650800 | 0.11699000 | 0.11777200 | 0.11807700 | 0.11739200 | 0.11566100 |
| 0.10948600 | 0.11010100 | 0.10954300 | 0.11000100 | 0.11268800 | 0.11562500 | 0.11691100 | 0.11673000 | 0.11640400 | 0.11682300 | 0.11766000 | 0.11806300 | 0.11741800 | 0.11566500 |
| 0.08967900 | 0.09019000 | 0.08949100 | 0.08970900 | 0.09215400 | 0.09495700 | 0.09621100 | 0.09604800 | 0.09573900 | 0.09613100 | 0.09690900 | 0.09729400 | 0.09671700 | 0.09506700 |
| 0.10194200 | 0.10264200 | 0.10203800 | 0.10223000 | 0.10460800 | 0.10739000 | 0.10868000 | 0.10861500 | 0.10844900 | 0.10896300 | 0.10978300 | 0.11014000 | 0.10951500 | 0.10783800 |
| 0.09503000 | 0.09564500 | 0.09506400 | 0.09539200 | 0.09788500 | 0.10067500 | 0.10191200 | 0.10176800 | 0.10149800 | 0.10190900 | 0.10264700 | 0.10294500 | 0.10229400 | 0.10061500 |
| 0.11124200 | 0.11181500 | 0.11125200 | 0.11162700 | 0.11415100 | 0.11696600 | 0.11825900 | 0.11820200 | 0.11801300 | 0.11845300 | 0.11919100 | 0.11953000 | 0.11896400 | 0.11736700 |
| 0.10168300 | 0.10226000 | 0.10160300 | 0.10183400 | 0.10427000 | 0.10709700 | 0.10844400 | 0.10840100 | 0.10815900 | 0.10855500 | 0.10932000 | 0.10970000 | 0.10912500 | 0.10748100 |
| 0.09038400 | 0.09094700 | 0.09026600 | 0.09050800 | 0.09293900 | 0.09567900 | 0.09688100 | 0.09671900 | 0.09643400 | 0.09683500 | 0.09761000 | 0.09799300 | 0.09740100 | 0.09571500 |
| 0.04911300 | 0.04965400 | 0.04889500 | 0.04892500 | 0.05110400 | 0.05367500 | 0.05479700 | 0.05459700 | 0.05429100 | 0.05466900 | 0.05538200 | 0.05566000 | 0.05497200 | 0.05321800 |
| 0.05517400 | 0.05568000 | 0.05498100 | 0.05514200 | 0.05737100 | 0.05984900 | 0.06083600 | 0.06057900 | 0.06029600 | 0.06071200 | 0.06147100 | 0.06181700 | 0.06120500 | 0.05953000 |
| 0.07200500 | 0.07265100 | 0.07199800 | 0.07214300 | 0.07442000 | 0.07702800 | 0.07811600 | 0.07785800 | 0.07753300 | 0.07795100 | 0.07876300 | 0.07918200 | 0.07863100 | 0.07697300 |

| 5374       | 5376       | 5378       | 5380       | 5382       | 5384       | 5386       | 5388       | 5390       | 5391       | 5393       | 5395       | 5397       | 5399       |
|------------|------------|------------|------------|------------|------------|------------|------------|------------|------------|------------|------------|------------|------------|
| 0.11865300 | 0.11884900 | 0.11941800 | 0.11995500 | 0.12024800 | 0.12052600 | 0.12106100 | 0.12167700 | 0.12199800 | 0.12189400 | 0.12155100 | 0.12130600 | 0.12125700 | 0.12122300 |
| 0.10672800 | 0.10693700 | 0.10746700 | 0.10795000 | 0.10821400 | 0.10845100 | 0.10893100 | 0.10951900 | 0.10980600 | 0.10963800 | 0.10931400 | 0.10920400 | 0.10925600 | 0.10922300 |
| 0.11966200 | 0.11990200 | 0.12197000 | 0.12354900 | 0.12343500 | 0.12279100 | 0.12346400 | 0.12501500 | 0.12537600 | 0.12404200 | 0.12278700 | 0.12325900 | 0.12474500 | 0.12566400 |
| 0.11650600 | 0.11678700 | 0.11893500 | 0.12062300 | 0.12053600 | 0.11977800 | 0.12030200 | 0.12180600 | 0.12219800 | 0.12087000 | 0.11956400 | 0.12001300 | 0.12156100 | 0.12258100 |
| 0.07328700 | 0.07335600 | 0.07528900 | 0.07683300 | 0.07668300 | 0.07586400 | 0.07623800 | 0.07752000 | 0.07774900 | 0.07640400 | 0.07520300 | 0.07578300 | 0.07743500 | 0.07852400 |
| 0.11396600 | 0.11419800 | 0.11626900 | 0.11785100 | 0.11769500 | 0.11697300 | 0.11759700 | 0.11915600 | 0.11953900 | 0.11820500 | 0.11696700 | 0.11751100 | 0.11905300 | 0.11992700 |
| 0.11395100 | 0.11418100 | 0.11624500 | 0.11782700 | 0.11767700 | 0.11697200 | 0.11765800 | 0.11926400 | 0.11961600 | 0.11823000 | 0.11693600 | 0.11738300 | 0.11885600 | 0.11976000 |
| 0.09337700 | 0.09351900 | 0.09547700 | 0.09699800 | 0.09681600 | 0.09605700 | 0.09660000 | 0.09801800 | 0.09827100 | 0.09692000 | 0.09573800 | 0.09629400 | 0.09783200 | 0.09879700 |
| 0.10616300 | 0.10634500 | 0.10837000 | 0.10999600 | 0.10990800 | 0.10918400 | 0.10976400 | 0.11129300 | 0.11167400 | 0.11036500 | 0.10911200 | 0.10957000 | 0.11108100 | 0.11205600 |
| 0.09893700 | 0.09911300 | 0.10111500 | 0.10270200 | 0.10262500 | 0.10196600 | 0.10256300 | 0.10402700 | 0.10433100 | 0.10299000 | 0.10176200 | 0.10225300 | 0.10373300 | 0.10464200 |
| 0.11575000 | 0.11597200 | 0.11798400 | 0.11955700 | 0.11948400 | 0.11887800 | 0.11953100 | 0.12098800 | 0.12124800 | 0.11990000 | 0.11870600 | 0.11921400 | 0.12067800 | 0.12155300 |
| 0.10582400 | 0.10603200 | 0.10805400 | 0.10964100 | 0.10956700 | 0.10893600 | 0.10956300 | 0.11102100 | 0.11130700 | 0.10997000 | 0.10874300 | 0.10920700 | 0.11066400 | 0.11157300 |
| 0.09400100 | 0.09417700 | 0.09621300 | 0.09780700 | 0.09769200 | 0.09699400 | 0.09756900 | 0.09900700 | 0.09930300 | 0.09800000 | 0.09684400 | 0.09740100 | 0.09890700 | 0.09979200 |
| 0.05145100 | 0.05156800 | 0.05349900 | 0.05490900 | 0.05454900 | 0.05360300 | 0.05400100 | 0.05537000 | 0.05565100 | 0.05433400 | 0.05316600 | 0.05372300 | 0.05524100 | 0.05618500 |
| 0.05781300 | 0.05789500 | 0.05974700 | 0.06113300 | 0.06082100 | 0.05996000 | 0.06043000 | 0.06180100 | 0.06204600 | 0.06073300 | 0.05959600 | 0.06015600 | 0.06170600 | 0.06273200 |
| 0.07521200 | 0.07521600 | 0.07702100 | 0.07844800 | 0.07823500 | 0.07743900 | 0.07792400 | 0.07935400 | 0.07971400 | 0.07846400 | 0.07727700 | 0.07777700 | 0.07930800 | 0.08029000 |

| 5401       | 5403       | 5405       | 5407       | 5409       | 5411       | 5413       | 5415       | 5417       | 5418       | 5420       | 5422       | 5424       | 5426       |
|------------|------------|------------|------------|------------|------------|------------|------------|------------|------------|------------|------------|------------|------------|
| 0.12106700 | 0.12084700 | 0.12063800 | 0.12040100 | 0.12012600 | 0.11995400 | 0.12009100 | 0.12055000 | 0.12105000 | 0.12134500 | 0.12145300 | 0.12150400 | 0.12148200 | 0.12133000 |
| 0.10905600 | 0.10888100 | 0.10871900 | 0.10844000 | 0.10807300 | 0.10789100 | 0.10812000 | 0.10868500 | 0.10926900 | 0.10962700 | 0.10974100 | 0.10969300 | 0.10948500 | 0.10918800 |
| 0.12555700 | 0.12497300 | 0.12400000 | 0.12207100 | 0.11960300 | 0.11833800 | 0.11950400 | 0.12236200 | 0.12505600 | 0.12646100 | 0.12668800 | 0.12617400 | 0.12483300 | 0.12287200 |
| 0.12253400 | 0.12196900 | 0.12106600 | 0.11925600 | 0.11682200 | 0.11547000 | 0.11656000 | 0.11942100 | 0.12215000 | 0.12359200 | 0.12384000 | 0.12331000 | 0.12192200 | 0.11991100 |
| 0.07853100 | 0.07802300 | 0.07716300 | 0.07535500 | 0.07286700 | 0.07140100 | 0.07237900 | 0.07520300 | 0.07792100 | 0.07932900 | 0.07957100 | 0.07907200 | 0.07768400 | 0.07560900 |
| 0.11971500 | 0.11912600 | 0.11831500 | 0.11655600 | 0.11408700 | 0.11270800 | 0.11385400 | 0.11680900 | 0.11958200 | 0.12100800 | 0.12125400 | 0.12075300 | 0.11935200 | 0.11725400 |
| 0.11961500 | 0.11903400 | 0.11818900 | 0.11642900 | 0.11400200 | 0.11265300 | 0.11380800 | 0.11679500 | 0.11959300 | 0.12098400 | 0.12115000 | 0.12058000 | 0.11916500 | 0.11712000 |
| 0.09877100 | 0.09831700 | 0.09751000 | 0.09571000 | 0.09322800 | 0.09179700 | 0.09279000 | 0.09556900 | 0.09823500 | 0.09961700 | 0.09982100 | 0.09928000 | 0.09790400 | 0.09591500 |
| 0.11196800 | 0.11139300 | 0.11053500 | 0.10880300 | 0.10642800 | 0.10505300 | 0.10605100 | 0.10886600 | 0.11161400 | 0.11307700 | 0.11334500 | 0.11284300 | 0.11146000 | 0.10940200 |
| 0.10455000 | 0.10404400 | 0.10324700 | 0.10151900 | 0.09910900 | 0.09771800 | 0.09873300 | 0.10154500 | 0.10426600 | 0.10570700 | 0.10595600 | 0.10545500 | 0.10411200 | 0.10211100 |
| 0.12141900 | 0.12086200 | 0.11998600 | 0.11817100 | 0.11574000 | 0.11444100 | 0.11562300 | 0.11855000 | 0.12126300 | 0.12264500 | 0.12287400 | 0.12237700 | 0.12101700 | 0.11902200 |
| 0.11147900 | 0.11095500 | 0.11011800 | 0.10832800 | 0.10588100 | 0.10452700 | 0.10561900 | 0.10846600 | 0.11115600 | 0.11254500 | 0.11277000 | 0.11227500 | 0.11096300 | 0.10903800 |
| 0.09965500 | 0.09911800 | 0.09829900 | 0.09655600 | 0.09416400 | 0.09281200 | 0.09384200 | 0.09660600 | 0.09922800 | 0.10059200 | 0.10083500 | 0.10034600 | 0.09899700 | 0.09703200 |
| 0.05616700 | 0.05575300 | 0.05499900 | 0.05325300 | 0.05080600 | 0.04937600 | 0.05035100 | 0.05311400 | 0.05576000 | 0.05711600 | 0.05730100 | 0.05675100 | 0.05539000 | 0.05341900 |
| 0.06273500 | 0.06221400 | 0.06131600 | 0.05950000 | 0.05709500 | 0.05577500 | 0.05683300 | 0.05960700 | 0.06223100 | 0.06356500 | 0.06371800 | 0.06311000 | 0.06167400 | 0.05966200 |
| 0.08024300 | 0.07976200 | 0.07898600 | 0.07726600 | 0.07485400 | 0.07345000 | 0.07439300 | 0.07705000 | 0.07963200 | 0.08106000 | 0.08140700 | 0.08099100 | 0.07966900 | 0.07766100 |

| 5428       | 5430       | 5432       | 5434       | 5436       | 5438       | 5440       | 5442       | 5444       | 5445       | 5447       | 5449       | 5451       | 5453       |
|------------|------------|------------|------------|------------|------------|------------|------------|------------|------------|------------|------------|------------|------------|
| 0.12125800 | 0.12145000 | 0.12167600 | 0.12179100 | 0.12190700 | 0.12196900 | 0.12188100 | 0.12173800 | 0.12166400 | 0.12175100 | 0.12207100 | 0.12254600 | 0.12299300 | 0.12328800 |
| 0.10914100 | 0.10947500 | 0.10982100 | 0.11000800 | 0.11014500 | 0.11013600 | 0.10989300 | 0.10965300 | 0.10964800 | 0.10987100 | 0.11021600 | 0.11061000 | 0.11101000 | 0.11133600 |
| 0.12182500 | 0.12240100 | 0.12323300 | 0.12386200 | 0.12454500 | 0.12436300 | 0.12311800 | 0.12215800 | 0.12213600 | 0.12272700 | 0.12388400 | 0.12554100 | 0.12704400 | 0.12768600 |
| 0.11882600 | 0.11937000 | 0.12015000 | 0.12073000 | 0.12143700 | 0.12136700 | 0.12025200 | 0.11933600 | 0.11924600 | 0.11977500 | 0.12097400 | 0.12271000 | 0.12423800 | 0.12485400 |
| 0.07443300 | 0.07490400 | 0.07565500 | 0.07622300 | 0.07690400 | 0.07682000 | 0.07570800 | 0.07479900 | 0.07472000 | 0.07522300 | 0.07631800 | 0.07789700 | 0.07928200 | 0.07982200 |
| 0.11609400 | 0.11664500 | 0.11746700 | 0.11807500 | 0.11881100 | 0.11875900 | 0.11759600 | 0.11659200 | 0.11648300 | 0.11705900 | 0.11827200 | 0.11996600 | 0.12144900 | 0.12205600 |
| 0.11602900 | 0.11659700 | 0.11743100 | 0.11808400 | 0.11884000 | 0.11879300 | 0.11768900 | 0.11674600 | 0.11661800 | 0.11714200 | 0.11834800 | 0.12006700 | 0.12157200 | 0.12219600 |
| 0.09484800 | 0.09539200 | 0.09618300 | 0.09680000 | 0.09753800 | 0.09747700 | 0.09635600 | 0.09543800 | 0.09537500 | 0.09591500 | 0.09704200 | 0.09864600 | 0.10005400 | 0.10058700 |
| 0.10823800 | 0.10873400 | 0.10952900 | 0.11015800 | 0.11093700 | 0.11098400 | 0.10998500 | 0.10911800 | 0.10903600 | 0.10954500 | 0.11064700 | 0.11224000 | 0.11368500 | 0.11430800 |
| 0.10099100 | 0.10151700 | 0.10233200 | 0.10296400 | 0.10373400 | 0.10373400 | 0.10263000 | 0.10165100 | 0.10150200 | 0.10199400 | 0.10313100 | 0.10478400 | 0.10625800 | 0.10687300 |
| 0.11794200 | 0.11845000 | 0.11920400 | 0.11982500 | 0.12060700 | 0.12061800 | 0.11956300 | 0.11864500 | 0.11854500 | 0.11908000 | 0.12023200 | 0.12185700 | 0.12328900 | 0.12390300 |
| 0.10801800 | 0.10858700 | 0.10937300 | 0.10994200 | 0.11060800 | 0.11049800 | 0.10938600 | 0.10853400 | 0.10852100 | 0.10903900 | 0.11012400 | 0.11174100 | 0.11322700 | 0.11388700 |
| 0.09599500 | 0.09654600 | 0.09731800 | 0.09792200 | 0.09867700 | 0.09866200 | 0.09758300 | 0.09667600 | 0.09658800 | 0.09709300 | 0.09823100 | 0.09988200 | 0.10129700 | 0.10180700 |
| 0.05229900 | 0.05272900 | 0.05344400 | 0.05403200 | 0.05475400 | 0.05471100 | 0.05363800 | 0.05273500 | 0.05262100 | 0.05309300 | 0.05415100 | 0.05563400 | 0.05689100 | 0.05736200 |
| 0.05857400 | 0.05906100 | 0.05979800 | 0.06039200 | 0.06112100 | 0.06106700 | 0.05997100 | 0.05906700 | 0.05900400 | 0.05953200 | 0.06059400 | 0.06207000 | 0.06335900 | 0.06386600 |
| 0.07650300 | 0.07695100 | 0.07770200 | 0.07829600 | 0.07900200 | 0.07890300 | 0.07772300 | 0.07674000 | 0.07665300 | 0.07721700 | 0.07838300 | 0.08001300 | 0.08144100 | 0.08200500 |

| 5455       | 5457       | 5459       | 5461       | 5463       | 5465       | 5467       | 5469       | 5471       | 5472       | 5474       | 5476       | 5478       | 5480       |
|------------|------------|------------|------------|------------|------------|------------|------------|------------|------------|------------|------------|------------|------------|
| 0.12345100 | 0.12354900 | 0.12359500 | 0.12364400 | 0.12375900 | 0.12390400 | 0.12406100 | 0.12425800 | 0.12436700 | 0.12422600 | 0.12400400 | 0.12402900 | 0.12422900 | 0.12438900 |
| 0.11154300 | 0.11165500 | 0.11170400 | 0.11176000 | 0.11184900 | 0.11189100 | 0.11191400 | 0.11206700 | 0.11227200 | 0.11228000 | 0.11216300 | 0.11224500 | 0.11251300 | 0.11273900 |
| 0.12750700 | 0.12694700 | 0.12634000 | 0.12620800 | 0.12668400 | 0.12715600 | 0.12749800 | 0.12803400 | 0.12815500 | 0.12721900 | 0.12649400 | 0.12747100 | 0.12915400 | 0.13011800 |
| 0.12463500 | 0.12404500 | 0.12342900 | 0.12328800 | 0.12373100 | 0.12415100 | 0.12445600 | 0.12500000 | 0.12515700 | 0.12422900 | 0.12348400 | 0.12449000 | 0.12625800 | 0.12727000 |
| 0.07960800 | 0.07906200 | 0.07845600 | 0.07824700 | 0.07858000 | 0.07891500 | 0.07919300 | 0.07976000 | 0.07995300 | 0.07906100 | 0.07835200 | 0.07935800 | 0.08107000 | 0.08202000 |
| 0.12189300 | 0.12142600 | 0.12090900 | 0.12073700 | 0.12104400 | 0.12136200 | 0.12168000 | 0.12230400 | 0.12251100 | 0.12160900 | 0.12091600 | 0.12196200 | 0.12368500 | 0.12458000 |
| 0.12202400 | 0.12149700 | 0.12093700 | 0.12079300 | 0.12115500 | 0.12152200 | 0.12189800 | 0.12255500 | 0.12272600 | 0.12173000 | 0.12093500 | 0.12191000 | 0.12363500 | 0.12463100 |
| 0.10031600 | 0.09970800 | 0.09909600 | 0.09894700 | 0.09937000 | 0.09977800 | 0.10005100 | 0.10054900 | 0.10074100 | 0.09997000 | 0.09937700 | 0.10035400 | 0.10194000 | 0.10279000 |
| 0.11414800 | 0.11363400 | 0.11308800 | 0.11298600 | 0.11343400 | 0.11386200 | 0.11417400 | 0.11466800 | 0.11474100 | 0.11378600 | 0.11307600 | 0.11408800 | 0.11580300 | 0.11677300 |
| 0.10670400 | 0.10619400 | 0.10561900 | 0.10541900 | 0.10574800 | 0.10612500 | 0.10649000 | 0.10710200 | 0.10728100 | 0.10638500 | 0.10567300 | 0.10661600 | 0.10823300 | 0.10912800 |
| 0.12379200 | 0.12336200 | 0.12288200 | 0.12277600 | 0.12312500 | 0.12343000 | 0.12370900 | 0.12426600 | 0.12439100 | 0.12344900 | 0.12277000 | 0.12381800 | 0.12553100 | 0.12649900 |
| 0.11376100 | 0.11326000 | 0.11269200 | 0.11252400 | 0.11286900 | 0.11322700 | 0.11358600 | 0.11421900 | 0.11441000 | 0.11349500 | 0.11275100 | 0.11367800 | 0.11530700 | 0.11623800 |
| 0.10156600 | 0.10105600 | 0.10056600 | 0.10051000 | 0.10094900 | 0.10134700 | 0.10167400 | 0.10222100 | 0.10231400 | 0.10135300 | 0.10066100 | 0.10166900 | 0.10329600 | 0.10414500 |
| 0.05716500 | 0.05665900 | 0.05607700 | 0.05588800 | 0.05622500 | 0.05653300 | 0.05675000 | 0.05721100 | 0.05730700 | 0.05641800 | 0.05578600 | 0.05681600 | 0.05845800 | 0.05930200 |
| 0.06366700 | 0.06315900 | 0.06259800 | 0.06237400 | 0.06262200 | 0.06291100 | 0.06321400 | 0.06378100 | 0.06393000 | 0.06302100 | 0.06231500 | 0.06328600 | 0.06495400 | 0.06589200 |
| 0.08179100 | 0.08126400 | 0.08069800 | 0.08048700 | 0.08076000 | 0.08105300 | 0.08132000 | 0.08185400 | 0.08201600 | 0.08114800 | 0.08047100 | 0.08145800 | 0.08314400 | 0.08410500 |

| 5482       | 5484       | 5486       | 5488       | 5490       | 5492       | 5494       | 5496       | 5498       | 5499       | 5501       | 5503       | 5505       | 5507       |
|------------|------------|------------|------------|------------|------------|------------|------------|------------|------------|------------|------------|------------|------------|
| 0.12451600 | 0.12466100 | 0.12482700 | 0.12501300 | 0.12519900 | 0.12548500 | 0.12601400 | 0.12662900 | 0.12707900 | 0.12733800 | 0.12747500 | 0.12752400 | 0.12756300 | 0.12768700 |
| 0.11284600 | 0.11287100 | 0.11290000 | 0.11300100 | 0.11317700 | 0.11351600 | 0.11411100 | 0.11476700 | 0.11523300 | 0.11551700 | 0.11572300 | 0.11583700 | 0.11584700 | 0.11588500 |
| 0.13018900 | 0.12962500 | 0.12878500 | 0.12803600 | 0.12755200 | 0.12788700 | 0.12941000 | 0.13114200 | 0.13215000 | 0.13258500 | 0.13266100 | 0.13228600 | 0.13179100 | 0.13188400 |
| 0.12733600 | 0.12677100 | 0.12593500 | 0.12515200 | 0.12460800 | 0.12491000 | 0.12646600 | 0.12828700 | 0.12937700 | 0.12983800 | 0.12990500 | 0.12952900 | 0.12903700 | 0.12913600 |
| 0.08206500 | 0.08146500 | 0.08051700 | 0.07959500 | 0.07893600 | 0.07911500 | 0.08050600 | 0.08213900 | 0.08306300 | 0.08343900 | 0.08351700 | 0.08314800 | 0.08257300 | 0.08255200 |
| 0.12452000 | 0.12386200 | 0.12298700 | 0.12224600 | 0.12179900 | 0.12217900 | 0.12374700 | 0.12551700 | 0.12653200 | 0.12696100 | 0.12706100 | 0.12675000 | 0.12632300 | 0.12646600 |
| 0.12471800 | 0.12416500 | 0.12332600 | 0.12257500 | 0.12212500 | 0.12252900 | 0.12409700 | 0.12584600 | 0.12689400 | 0.12739800 | 0.12755000 | 0.12724400 | 0.12676500 | 0.12680400 |
| 0.10281100 | 0.10227500 | 0.10145800 | 0.10065400 | 0.10005900 | 0.10028100 | 0.10170800 | 0.10336300 | 0.10431700 | 0.10474100 | 0.10489800 | 0.10467100 | 0.10425900 | 0.10430300 |
| 0.11686300 | 0.11635700 | 0.11558200 | 0.11488000 | 0.11439300 | 0.11465200 | 0.11609800 | 0.11783000 | 0.11886400 | 0.11930700 | 0.11942900 | 0.11915400 | 0.11871800 | 0.11877800 |
| 0.10919700 | 0.10871900 | 0.10795600 | 0.10719900 | 0.10666000 | 0.10690900 | 0.10833300 | 0.11001800 | 0.11103800 | 0.11150200 | 0.11161200 | 0.11127300 | 0.11080000 | 0.11091500 |
| 0.12660500 | 0.12608900 | 0.12525900 | 0.12450200 | 0.12403500 | 0.12437400 | 0.12583900 | 0.12749300 | 0.12846600 | 0.12893700 | 0.12912000 | 0.12887500 | 0.12845500 | 0.12856900 |
| 0.11634200 | 0.11587000 | 0.11509700 | 0.11436000 | 0.11387700 | 0.11419200 | 0.11564800 | 0.11731600 | 0.11829600 | 0.11873500 | 0.11887600 | 0.11860400 | 0.11815000 | 0.11821400 |
| 0.10416700 | 0.10365300 | 0.10284600 | 0.10203500 | 0.10145400 | 0.10172900 | 0.10323900 | 0.10499300 | 0.10602300 | 0.10645600 | 0.10654400 | 0.10622800 | 0.10578800 | 0.10588200 |
| 0.05925600 | 0.05862100 | 0.05769400 | 0.05681100 | 0.05618700 | 0.05637700 | 0.05772500 | 0.05928800 | 0.06016800 | 0.06049900 | 0.06049900 | 0.06011100 | 0.05962400 | 0.05966300 |
| 0.06593600 | 0.06534200 | 0.06441800 | 0.06350700 | 0.06284000 | 0.06302800 | 0.06442800 | 0.06603200 | 0.06690500 | 0.06722200 | 0.06723600 | 0.06686700 | 0.06639900 | 0.06649800 |
| 0.08416000 | 0.08359000 | 0.08275200 | 0.08196000 | 0.08132900 | 0.08144000 | 0.08277600 | 0.08439800 | 0.08531000 | 0.08567400 | 0.08578300 | 0.08552200 | 0.08508700 | 0.08512400 |



| 5509       | 5511       | 5513       | 5515       | 5517       | 5519       | 5521       | 5523       | 5525       | 5526       | 5528       | 5530       | 5532       | 5534       |
|------------|------------|------------|------------|------------|------------|------------|------------|------------|------------|------------|------------|------------|------------|
| 0.12789100 | 0.12807700 | 0.12820400 | 0.12832500 | 0.12849500 | 0.12870400 | 0.12889200 | 0.12895900 | 0.12884200 | 0.12861100 | 0.12838300 | 0.12816300 | 0.12788400 | 0.12758800 |
| 0.11607300 | 0.11634100 | 0.11654800 | 0.11668300 | 0.11683000 | 0.11698900 | 0.11710100 | 0.11714100 | 0.11707200 | 0.11685900 | 0.11654200 | 0.11621200 | 0.11596900 | 0.11589900 |
| 0.13263600 | 0.13329000 | 0.13341300 | 0.13338600 | 0.13355400 | 0.13371300 | 0.13376500 | 0.13392000 | 0.13410700 | 0.13407300 | 0.13383400 | 0.13351100 | 0.13313900 | 0.13284000 |
| 0.12992600 | 0.13063100 | 0.13073000 | 0.13058500 | 0.13066100 | 0.13088600 | 0.13111400 | 0.13138600 | 0.13155400 | 0.13142400 | 0.13108900 | 0.13071100 | 0.13031700 | 0.13000600 |
| 0.08329200 | 0.08401300 | 0.08412700 | 0.08395600 | 0.08395300 | 0.08404700 | 0.08417300 | 0.08446700 | 0.08477200 | 0.08482700 | 0.08466100 | 0.08437200 | 0.08399600 | 0.08370900 |
| 0.12724700 | 0.12788500 | 0.12791700 | 0.12778200 | 0.12794400 | 0.12823500 | 0.12846200 | 0.12873000 | 0.12895400 | 0.12890800 | 0.12860700 | 0.12816500 | 0.12764900 | 0.12726000 |
| 0.12751900 | 0.12819300 | 0.12830300 | 0.12818600 | 0.12830400 | 0.12857000 | 0.12882800 | 0.12910900 | 0.12927100 | 0.12915400 | 0.12884300 | 0.12844500 | 0.12799200 | 0.12764200 |
| 0.10495500 | 0.10552600 | 0.10555500 | 0.10540100 | 0.10546800 | 0.10562000 | 0.10573100 | 0.10594800 | 0.10619800 | 0.10624800 | 0.10610000 | 0.10585000 | 0.10551200 | 0.10517900 |
| 0.11949100 | 0.12017100 | 0.12032400 | 0.12026700 | 0.12038900 | 0.12058200 | 0.12074900 | 0.12101900 | 0.12125700 | 0.12120400 | 0.12088400 | 0.12044800 | 0.11998100 | 0.11963300 |
| 0.11172200 | 0.11244900 | 0.11258900 | 0.11248600 | 0.11253600 | 0.11263800 | 0.11274700 | 0.11301100 | 0.11325600 | 0.11322700 | 0.11299300 | 0.11265900 | 0.11221600 | 0.11182600 |
| 0.12935700 | 0.13007200 | 0.13022300 | 0.13016700 | 0.13028000 | 0.13040900 | 0.13048000 | 0.13066100 | 0.13082800 | 0.13075000 | 0.13048800 | 0.13015100 | 0.12972900 | 0.12936800 |
| 0.11895900 | 0.11964100 | 0.11973400 | 0.11960400 | 0.11972200 | 0.11998800 | 0.12022300 | 0.12048000 | 0.12065400 | 0.12055600 | 0.12022800 | 0.11981700 | 0.11939700 | 0.11908300 |
| 0.10662800 | 0.10729100 | 0.10735400 | 0.10717900 | 0.10724200 | 0.10743500 | 0.10758900 | 0.10782900 | 0.10809300 | 0.10815400 | 0.10798900 | 0.10767400 | 0.10724000 | 0.10685000 |
| 0.06032500 | 0.06093100 | 0.06101700 | 0.06089000 | 0.06093000 | 0.06103400 | 0.06112200 | 0.06134600 | 0.06160800 | 0.06167900 | 0.06156300 | 0.06132900 | 0.06098600 | 0.06067200 |
| 0.06725200 | 0.06790000 | 0.06792700 | 0.06769200 | 0.06765600 | 0.06774300 | 0.06786300 | 0.06812100 | 0.06837300 | 0.06841000 | 0.06827900 | 0.06804200 | 0.06767800 | 0.06735100 |
| 0.08579100 | 0.08640900 | 0.08648100 | 0.08629300 | 0.08625000 | 0.08633200 | 0.08649900 | 0.08682600 | 0.08711900 | 0.08715100 | 0.08700100 | 0.08677300 | 0.08643400 | 0.08609900 |

| 5536       | 5538       | 5540       | 5542       | 5544       | 5546       | 5548       | 5550       | 5552       | 5553       | 5555       | 5557       | 5559       | 5561       |
|------------|------------|------------|------------|------------|------------|------------|------------|------------|------------|------------|------------|------------|------------|
| 0.12743800 | 0.12753400 | 0.12780500 | 0.12815500 | 0.12856700 | 0.12904400 | 0.12954800 | 0.13000500 | 0.13039500 | 0.13080500 | 0.13133200 | 0.13197400 | 0.13265000 | 0.13333100 |
| 0.11601100 | 0.11620800 | 0.11641300 | 0.11666500 | 0.11702600 | 0.11746100 | 0.11785800 | 0.11818800 | 0.11854700 | 0.11902600 | 0.11963100 | 0.12032400 | 0.12105700 | 0.12180200 |
| 0.13285400 | 0.13321600 | 0.13366500 | 0.13401400 | 0.13429800 | 0.13459700 | 0.13492500 | 0.13528900 | 0.13575300 | 0.13638500 | 0.13714400 | 0.13792700 | 0.13867100 | 0.13937800 |
| 0.13002400 | 0.13043500 | 0.13098200 | 0.13143400 | 0.13180000 | 0.13217300 | 0.13257300 | 0.13297900 | 0.13344200 | 0.13403500 | 0.13474000 | 0.13549100 | 0.13623800 | 0.13696200 |
| 0.08376100 | 0.08410900 | 0.08445300 | 0.08465000 | 0.08477900 | 0.08491800 | 0.08508400 | 0.08531500 | 0.08567000 | 0.08615800 | 0.08671900 | 0.08729900 | 0.08785900 | 0.08836100 |
| 0.12732000 | 0.12784600 | 0.12846400 | 0.12890300 | 0.12918600 | 0.12941500 | 0.12965100 | 0.12993600 | 0.13035800 | 0.13098500 | 0.13175000 | 0.13254100 | 0.13329900 | 0.13401600 |
| 0.12766900 | 0.12809800 | 0.12864000 | 0.12909000 | 0.12944600 | 0.12975600 | 0.13009700 | 0.13054300 | 0.13109400 | 0.13172400 | 0.13240600 | 0.13308200 | 0.13372800 | 0.13438300 |
| 0.10510200 | 0.10538900 | 0.10582100 | 0.10618200 | 0.10650600 | 0.10685600 | 0.10716100 | 0.10736700 | 0.10759700 | 0.10802900 | 0.10868100 | 0.10941900 | 0.11011400 | 0.11073100 |
| 0.11966500 | 0.12011000 | 0.12066000 | 0.12107800 | 0.12138400 | 0.12166500 | 0.12195600 | 0.12228600 | 0.12274200 | 0.12340200 | 0.12421600 | 0.12507600 | 0.12589200 | 0.12660400 |
| 0.11182300 | 0.11227100 | 0.11283700 | 0.11323400 | 0.11346900 | 0.11368500 | 0.11396600 | 0.11431400 | 0.11476100 | 0.11535500 | 0.11606800 | 0.11682500 | 0.11754500 | 0.11818400 |
| 0.12936200 | 0.12976900 | 0.13032300 | 0.13076700 | 0.13104000 | 0.13124700 | 0.13152500 | 0.13192100 | 0.13245700 | 0.13315500 | 0.13395500 | 0.13477300 | 0.13555800 | 0.13629100 |
| 0.11911800 | 0.11956700 | 0.12013100 | 0.12054400 | 0.12083300 | 0.12110400 | 0.12139100 | 0.12172500 | 0.12219600 | 0.12287200 | 0.12368200 | 0.12449000 | 0.12522100 | 0.12589500 |
| 0.10681900 | 0.10723100 | 0.10778500 | 0.10819500 | 0.10844500 | 0.10864700 | 0.10888200 | 0.10916500 | 0.10953100 | 0.11007300 | 0.11080400 | 0.11160100 | 0.11233400 | 0.11298700 |
| 0.06067200 | 0.06103400 | 0.06144800 | 0.06167800 | 0.06176500 | 0.06182500 | 0.06190800 | 0.06203100 | 0.06225600 | 0.06266100 | 0.06319600 | 0.06371700 | 0.06414400 | 0.06448200 |
| 0.06738900 | 0.06782600 | 0.06830300 | 0.06854900 | 0.06862900 | 0.06869100 | 0.06877800 | 0.06891900 | 0.06921200 | 0.06969500 | 0.07026000 | 0.07078300 | 0.07123600 | 0.07164800 |
| 0.08608500 | 0.08646000 | 0.08690600 | 0.08718500 | 0.08734800 | 0.08751300 | 0.08770900 | 0.08792300 | 0.08822700 | 0.08871000 | 0.08928300 | 0.08979000 | 0.09022500 | 0.09069300 |

| 5563       | 5565       | 5567       | 5569       | 5571       | 5573       | 5575       | 5577       | 5579       | 5580       | 5582       | 5584       | 5586       | 5588       |
|------------|------------|------------|------------|------------|------------|------------|------------|------------|------------|------------|------------|------------|------------|
| 0.13405200 | 0.13478600 | 0.13543600 | 0.13594500 | 0.13631500 | 0.13658500 | 0.13684800 | 0.13722900 | 0.13775800 | 0.13833800 | 0.13889100 | 0.13941300 | 0.13988400 | 0.14025700 |
| 0.12256000 | 0.12331300 | 0.12399100 | 0.12450300 | 0.12479200 | 0.12492800 | 0.12509800 | 0.12546600 | 0.12604200 | 0.12672700 | 0.12740400 | 0.12800400 | 0.12848700 | 0.12883600 |
| 0.14008800 | 0.14079400 | 0.14139500 | 0.14180200 | 0.14200800 | 0.14211800 | 0.14235900 | 0.14286400 | 0.14349600 | 0.14407600 | 0.14460600 | 0.14513100 | 0.14561700 | 0.14602700 |
| 0.13768500 | 0.13842300 | 0.13912000 | 0.13964900 | 0.13993100 | 0.14006800 | 0.14028700 | 0.14072500 | 0.14135800 | 0.14209200 | 0.14282100 | 0.14343300 | 0.14386700 | 0.14416700 |
| 0.08881300 | 0.08925700 | 0.08968700 | 0.09003700 | 0.09025900 | 0.09038800 | 0.09054100 | 0.09081900 | 0.09120400 | 0.09159200 | 0.09190800 | 0.09218900 | 0.09251400 | 0.09284700 |
| 0.13472000 | 0.13543100 | 0.13609400 | 0.13659700 | 0.13688300 | 0.13704300 | 0.13728100 | 0.13773200 | 0.13836700 | 0.13906400 | 0.13972100 | 0.14028500 | 0.14071700 | 0.14101500 |
| 0.13508500 | 0.13584400 | 0.13661500 | 0.13726000 | 0.13764100 | 0.13779800 | 0.13796300 | 0.13835100 | 0.13894900 | 0.13962600 | 0.14031800 | 0.14100500 | 0.14159400 | 0.14200300 |
| 0.11132100 | 0.11193300 | 0.11252400 | 0.11299900 | 0.11330400 | 0.11348200 | 0.11368200 | 0.11404600 | 0.11456800 | 0.11513800 | 0.11565800 | 0.11606700 | 0.11636000 | 0.11660500 |
| 0.12725200 | 0.12793500 | 0.12863900 | 0.12920700 | 0.12951200 | 0.12963800 | 0.12981600 | 0.13019400 | 0.13076400 | 0.13142300 | 0.13208600 | 0.13273500 | 0.13334500 | 0.13383300 |
| 0.11879300 | 0.11946500 | 0.12017600 | 0.12075900 | 0.12106500 | 0.12116400 | 0.12132500 | 0.12171900 | 0.12224900 | 0.12277000 | 0.12326900 | 0.12377400 | 0.12427100 | 0.12469000 |
| 0.13701100 | 0.13776900 | 0.13849700 | 0.13903300 | 0.13931500 | 0.13949500 | 0.13981300 | 0.14032000 | 0.14087000 | 0.14141300 | 0.14203100 | 0.14269700 | 0.14324200 | 0.14358100 |
| 0.12657900 | 0.12727900 | 0.12793800 | 0.12850000 | 0.12889900 | 0.12911800 | 0.12931100 | 0.12968800 | 0.13028400 | 0.13096800 | 0.13161600 | 0.13219800 | 0.13270300 | 0.13307500 |
| 0.11361900 | 0.11425400 | 0.11484800 | 0.11531000 | 0.11557200 | 0.11570800 | 0.11592100 | 0.11632900 | 0.11687400 | 0.11745700 | 0.11803400 | 0.11858400 | 0.11903900 | 0.11936200 |
| 0.06479800 | 0.06513700 | 0.06544900 | 0.06567900 | 0.06582700 | 0.06590700 | 0.06601800 | 0.06628700 | 0.06667200 | 0.06703300 | 0.06734300 | 0.06764000 | 0.06790900 | 0.06810600 |
| 0.07204200 | 0.07241300 | 0.07274000 | 0.07302200 | 0.07323700 | 0.07336200 | 0.07347600 | 0.07371300 | 0.07407700 | 0.07446100 | 0.07478900 | 0.07507700 | 0.07535000 | 0.07560500 |
| 0.09126000 | 0.09188500 | 0.09244800 | 0.09283500 | 0.09299900 | 0.09304500 | 0.09320900 | 0.09359200 | 0.09405600 | 0.09446900 | 0.09485400 | 0.09524200 | 0.09557600 | 0.09580800 |

| 5590       | 5592       | 5594       | 5596       | 5598       | 5600       | 5602       | 5604       | 5606       | 5607       | 5609       | 5611       | 5613       | 5615       |
|------------|------------|------------|------------|------------|------------|------------|------------|------------|------------|------------|------------|------------|------------|
| 0.14053600 | 0.14075700 | 0.14092400 | 0.14107300 | 0.14126600 | 0.14146900 | 0.14155500 | 0.14150100 | 0.14141000 | 0.14135800 | 0.14132300 | 0.14124800 | 0.14108600 | 0.14081300 |
| 0.12908400 | 0.12929300 | 0.12950000 | 0.12968100 | 0.12978900 | 0.12983400 | 0.12987100 | 0.12989800 | 0.12987100 | 0.12980800 | 0.12973700 | 0.12961500 | 0.12940300 | 0.12912200 |
| 0.14637400 | 0.14666200 | 0.14688200 | 0.14703600 | 0.14712700 | 0.14716000 | 0.14718200 | 0.14722900 | 0.14727000 | 0.14725600 | 0.14714500 | 0.14692500 | 0.14668000 | 0.14647300 |
| 0.14441500 | 0.14465100 | 0.14489100 | 0.14511900 | 0.14526000 | 0.14527300 | 0.14524600 | 0.14529500 | 0.14540100 | 0.14543100 | 0.14530800 | 0.14509100 | 0.14489200 | 0.14472000 |
| 0.09307000 | 0.09316500 | 0.09323700 | 0.09335700 | 0.09347100 | 0.09351800 | 0.09353200 | 0.09357600 | 0.09362700 | 0.09363000 | 0.09357900 | 0.09349200 | 0.09338900 | 0.09326500 |
| 0.14123900 | 0.14144400 | 0.14162300 | 0.14175700 | 0.14186600 | 0.14199700 | 0.14215600 | 0.14228500 | 0.14231400 | 0.14222100 | 0.14203200 | 0.14181200 | 0.14163200 | 0.14147800 |
| 0.14227500 | 0.14248800 | 0.14265100 | 0.14277100 | 0.14287000 | 0.14295300 | 0.14305200 | 0.14318600 | 0.14330200 | 0.14331200 | 0.14316400 | 0.14288400 | 0.14258200 | 0.14231400 |
| 0.11687900 | 0.11717900 | 0.11743700 | 0.11760100 | 0.11764700 | 0.11760400 | 0.11758000 | 0.11764400 | 0.11771600 | 0.11770300 | 0.11760300 | 0.11744400 | 0.11726600 | 0.11711600 |
| 0.13416900 | 0.13439500 | 0.13454400 | 0.13465500 | 0.13475900 | 0.13484700 | 0.13491900 | 0.13496900 | 0.13494200 | 0.13481200 | 0.13461300 | 0.13441100 | 0.13426700 | 0.13413700 |
| 0.12497800 | 0.12517100 | 0.12534800 | 0.12553200 | 0.12568000 | 0.12575900 | 0.12580800 | 0.12588000 | 0.12592400 | 0.12584900 | 0.12569000 | 0.12552000 | 0.12531900 | 0.12507500 |
| 0.14379900 | 0.14402000 | 0.14425400 | 0.14442600 | 0.14450800 | 0.14456700 | 0.14467200 | 0.14479600 | 0.14484500 | 0.14477000 | 0.14460600 | 0.14441200 | 0.14423900 | 0.14409200 |
| 0.13330400 | 0.13347500 | 0.13366000 | 0.13386800 | 0.13407500 | 0.13424000 | 0.13434400 | 0.13436300 | 0.13426700 | 0.13411400 | 0.13398500 | 0.13385700 | 0.13366800 | 0.13343500 |
| 0.11961300 | 0.11985100 | 0.12006000 | 0.12023700 | 0.12040100 | 0.12053400 | 0.12061900 | 0.12064500 | 0.12059200 | 0.12046500 | 0.12029500 | 0.12010700 | 0.11993900 | 0.11980200 |
| 0.06823900 | 0.06834400 | 0.06846400 | 0.06860300 | 0.06867800 | 0.06862200 | 0.06853500 | 0.06854700 | 0.06862200 | 0.06864800 | 0.06859800 | 0.06851700 | 0.06845700 | 0.06841700 |
| 0.07582200 | 0.07597800 | 0.07606400 | 0.07610800 | 0.07614300 | 0.07616800 | 0.07616700 | 0.07616800 | 0.07622000 | 0.07630000 | 0.07631500 | 0.07622400 | 0.07607900 | 0.07594400 |
| 0.09598500 | 0.09618300 | 0.09641900 | 0.09663300 | 0.09674700 | 0.09675700 | 0.09674000 | 0.09675300 | 0.09678000 | 0.09677000 | 0.09667900 | 0.09651200 | 0.09634900 | 0.09624100 |

| 5617       | 5619       | 5621       | 5623       | 5625       | 5627       | 5629       | 5631       | 5633       | 5634       | 5636       | 5638       | 5640       | 5642       |
|------------|------------|------------|------------|------------|------------|------------|------------|------------|------------|------------|------------|------------|------------|
| 0.14045800 | 0.14008000 | 0.13972100 | 0.13942000 | 0.13922700 | 0.13914400 | 0.13914000 | 0.13923300 | 0.13948000 | 0.13986400 | 0.14029100 | 0.14070000 | 0.14107100 | 0.14134700 |
| 0.12880000 | 0.12844600 | 0.12809400 | 0.12780000 | 0.12760400 | 0.12750600 | 0.12749300 | 0.12759800 | 0.12786100 | 0.12823800 | 0.12866000 | 0.12912100 | 0.12958800 | 0.12994300 |
| 0.14624700 | 0.14594600 | 0.14559900 | 0.14527100 | 0.14503400 | 0.14491900 | 0.14493300 | 0.14511400 | 0.14546300 | 0.14586700 | 0.14624400 | 0.14662800 | 0.14699800 | 0.14722800 |
| 0.14447500 | 0.14411200 | 0.14371300 | 0.14339300 | 0.14319900 | 0.14311400 | 0.14313000 | 0.14327100 | 0.14354800 | 0.14391500 | 0.14431400 | 0.14470000 | 0.14503900 | 0.14531400 |
| 0.09307000 | 0.09278800 | 0.09251500 | 0.09234900 | 0.09226900 | 0.09220200 | 0.09216000 | 0.09221800 | 0.09240000 | 0.09264800 | 0.09289700 | 0.09314100 | 0.09339200 | 0.09362300 |
| 0.14127100 | 0.14097200 | 0.14060400 | 0.14025700 | 0.14004400 | 0.13996700 | 0.13994100 | 0.13999300 | 0.14024100 | 0.14067600 | 0.14115300 | 0.14159100 | 0.14197100 | 0.14224200 |
| 0.14204400 | 0.14176100 | 0.14149200 | 0.14123700 | 0.14101600 | 0.14089400 | 0.14089700 | 0.14103100 | 0.14133000 | 0.14175900 | 0.14220700 | 0.14264400 | 0.14307400 | 0.14340000 |
| 0.11697700 | 0.11677300 | 0.11646700 | 0.11613600 | 0.11590400 | 0.11580400 | 0.11578600 | 0.11585000 | 0.11607200 | 0.11645300 | 0.11687300 | 0.11725900 | 0.11762500 | 0.11791900 |
| 0.13389900 | 0.13353200 | 0.13316600 | 0.13290500 | 0.13272100 | 0.13257300 | 0.13253500 | 0.13268700 | 0.13299300 | 0.13336600 | 0.13378900 | 0.13427600 | 0.13475500 | 0.13511200 |
| 0.12484600 | 0.12464700 | 0.12443100 | 0.12420200 | 0.12399300 | 0.12380700 | 0.12367800 | 0.12371100 | 0.12395500 | 0.12434500 | 0.12479200 | 0.12524200 | 0.12563800 | 0.12594000 |
| 0.14390600 | 0.14363600 | 0.14329800 | 0.14294000 | 0.14262100 | 0.14239400 | 0.14232700 | 0.14249900 | 0.14291500 | 0.14344400 | 0.14392700 | 0.14431800 | 0.14465500 | 0.14493700 |
| 0.13319900 | 0.13293700 | 0.13260100 | 0.13220500 | 0.13185600 | 0.13166500 | 0.13168000 | 0.13189700 | 0.13228400 | 0.13274700 | 0.13319500 | 0.13360800 | 0.13399700 | 0.13433800 |
| 0.11962300 | 0.11934400 | 0.11904000 | 0.11880700 | 0.11864400 | 0.11853000 | 0.11850300 | 0.11859300 | 0.11879700 | 0.11910100 | 0.11949500 | 0.11996500 | 0.12043400 | 0.12075100 |
| 0.06833300 | 0.06815600 | 0.06791800 | 0.06770800 | 0.06757600 | 0.06750300 | 0.06749300 | 0.06759700 | 0.06781800 | 0.06805700 | 0.06821900 | 0.06833100 | 0.06846400 | 0.06861600 |
| 0.07581300 | 0.07565300 | 0.07548600 | 0.07536400 | 0.07529100 | 0.07522700 | 0.07515100 | 0.07511200 | 0.07519400 | 0.07541700 | 0.07569100 | 0.07594900 | 0.07620900 | 0.07644800 |
| 0.09612400 | 0.09591200 | 0.09562800 | 0.09535500 | 0.09515500 | 0.09506300 | 0.09510000 | 0.09523300 | 0.09541900 | 0.09568100 | 0.09602800 | 0.09639400 | 0.09669900 | 0.09690400 |

| 5644       | 5646       | 5648       | 5650       | 5652       | 5654       | 5656       | 5658       | 5659       | 5661       | 5663       | 5665       | 5667       | 5669       |
|------------|------------|------------|------------|------------|------------|------------|------------|------------|------------|------------|------------|------------|------------|
| 0.14148500 | 0.14154800 | 0.14161300 | 0.14167500 | 0.14171000 | 0.14172700 | 0.14173800 | 0.14177400 | 0.14186200 | 0.14200400 | 0.14222300 | 0.14252300 | 0.14281000 | 0.14299800 |
| 0.13011800 | 0.13016200 | 0.13015200 | 0.13013900 | 0.13014200 | 0.13017100 | 0.13024300 | 0.13033300 | 0.13038900 | 0.13045700 | 0.13062000 | 0.13086200 | 0.13112400 | 0.13142000 |
| 0.14731500 | 0.14742400 | 0.14761200 | 0.14776100 | 0.14778000 | 0.14770500 | 0.14764200 | 0.14764300 | 0.14768300 | 0.14776400 | 0.14792300 | 0.14814900 | 0.14840600 | 0.14870000 |
| 0.14550900 | 0.14561300 | 0.14567700 | 0.14574000 | 0.14577700 | 0.14576500 | 0.14575100 | 0.14579700 | 0.14589100 | 0.14599800 | 0.14615500 | 0.14641000 | 0.14673200 | 0.14709000 |
| 0.09379200 | 0.09388600 | 0.09391700 | 0.09390000 | 0.09387200 | 0.09388000 | 0.09393700 | 0.09399000 | 0.09399200 | 0.09400000 | 0.09411600 | 0.09433500 | 0.09457700 | 0.09477600 |
| 0.14239200 | 0.14246100 | 0.14246600 | 0.14247000 | 0.14254400 | 0.14262200 | 0.14263300 | 0.14262100 | 0.14260800 | 0.14260900 | 0.14273700 | 0.14305100 | 0.14346700 | 0.14387400 |
| 0.14353900 | 0.14353900 | 0.14350800 | 0.14350900 | 0.14352700 | 0.14353900 | 0.14356600 | 0.14361400 | 0.14365600 | 0.14373200 | 0.14392400 | 0.14421900 | 0.14453800 | 0.14487800 |
| 0.11804500 | 0.11804800 | 0.11806500 | 0.11811200 | 0.11811000 | 0.11805700 | 0.11802400 | 0.11804400 | 0.11810600 | 0.11822600 | 0.11843800 | 0.11871800 | 0.11899700 | 0.11925500 |
| 0.13532700 | 0.13543100 | 0.13543600 | 0.13538100 | 0.13533200 | 0.13531800 | 0.13534300 | 0.13540000 | 0.13547100 | 0.13558500 | 0.13579000 | 0.13604400 | 0.13628500 | 0.13655400 |
| 0.12614700 | 0.12627100 | 0.12632700 | 0.12635100 | 0.12635500 | 0.12632300 | 0.12628300 | 0.12629000 | 0.12635500 | 0.12648200 | 0.12670700 | 0.12700000 | 0.12727000 | 0.12750400 |
| 0.14512500 | 0.14522700 | 0.14530200 | 0.14538800 | 0.14546800 | 0.14552500 | 0.14557800 | 0.14564200 | 0.14567100 | 0.14565100 | 0.14567800 | 0.14585300 | 0.14616100 | 0.14653000 |
| 0.13456800 | 0.13466500 | 0.13469700 | 0.13472200 | 0.13471400 | 0.13467100 | 0.13465300 | 0.13468300 | 0.13472400 | 0.13480300 | 0.13498300 | 0.13525200 | 0.13558000 | 0.13594900 |
| 0.12086900 | 0.12090400 | 0.12095400 | 0.12102100 | 0.12109200 | 0.12113600 | 0.12112100 | 0.12107800 | 0.12105500 | 0.12108100 | 0.12120000 | 0.12142700 | 0.12171500 | 0.12202800 |
| 0.06873800 | 0.06881300 | 0.06885600 | 0.06887400 | 0.06887800 | 0.06889000 | 0.06890900 | 0.06890800 | 0.06888800 | 0.06889100 | 0.06897300 | 0.06912100 | 0.06925600 | 0.06935500 |
| 0.07660000 | 0.07665200 | 0.07664800 | 0.07662600 | 0.07659900 | 0.07656700 | 0.07653500 | 0.07651800 | 0.07654000 | 0.07660200 | 0.07670200 | 0.07684000 | 0.07700100 | 0.07716500 |
| 0.09701000 | 0.09705500 | 0.09707600 | 0.09707400 | 0.09705900 | 0.09705900 | 0.09707000 | 0.09707800 | 0.09710700 | 0.09716800 | 0.09726100 | 0.09742700 | 0.09768200 | 0.09796100 |

| 5671       | 5673       | 5675       | 5677       | 5679       | 5681       | 5683       | 5685       | 5686       | 5688       | 5690       | 5692       | 5694       | 5696       |
|------------|------------|------------|------------|------------|------------|------------|------------|------------|------------|------------|------------|------------|------------|
| 0.14316300 | 0.14347300 | 0.14400900 | 0.14473500 | 0.14556100 | 0.14635800 | 0.14703100 | 0.14761800 | 0.14815500 | 0.14855100 | 0.14872100 | 0.14870500 | 0.14860500 | 0.14846900 |
| 0.13179800 | 0.13228300 | 0.13287000 | 0.13353300 | 0.13425600 | 0.13499800 | 0.13566600 | 0.13622400 | 0.13669400 | 0.13705700 | 0.13727600 | 0.13734800 | 0.13730700 | 0.13720600 |
| 0.14904300 | 0.14944900 | 0.14995100 | 0.15054400 | 0.15118200 | 0.15185500 | 0.15256000 | 0.15323100 | 0.15376100 | 0.15406500 | 0.15416200 | 0.15418700 | 0.15423300 | 0.15425000 |
| 0.14749100 | 0.14794100 | 0.14843600 | 0.14899000 | 0.14963800 | 0.15037800 | 0.15112700 | 0.15179700 | 0.15234600 | 0.15274500 | 0.15296800 | 0.15301300 | 0.15292200 | 0.15276700 |
| 0.09493600 | 0.09512800 | 0.09541200 | 0.09579500 | 0.09627800 | 0.09683600 | 0.09739700 | 0.09787300 | 0.09821200 | 0.09840500 | 0.09847600 | 0.09845300 | 0.09839800 | 0.09838800 |
| 0.14423900 | 0.14461900 | 0.14510000 | 0.14573000 | 0.14647800 | 0.14724800 | 0.14795200 | 0.14854800 | 0.14901600 | 0.14934800 | 0.14955700 | 0.14964700 | 0.14961500 | 0.14948700 |
| 0.14530100 | 0.14584600 | 0.14649600 | 0.14720000 | 0.14791700 | 0.14862700 | 0.14928600 | 0.14983500 | 0.15024900 | 0.15053600 | 0.15070100 | 0.15075200 | 0.15073900 | 0.15071900 |
| 0.11951300 | 0.11980600 | 0.12021200 | 0.12078300 | 0.12145600 | 0.12210400 | 0.12264800 | 0.12308300 | 0.12343800 | 0.12372400 | 0.12390600 | 0.12394800 | 0.12388300 | 0.12380200 |
| 0.13690300 | 0.13732800 | 0.13782200 | 0.13840500 | 0.13911000 | 0.13992400 | 0.14073100 | 0.14140700 | 0.14191500 | 0.14227200 | 0.14249000 | 0.14257500 | 0.14253200 | 0.14237900 |
| 0.12777700 | 0.12816500 | 0.12868700 | 0.12930300 | 0.12994600 | 0.13056300 | 0.13117200 | 0.13180400 | 0.13234300 | 0.13261800 | 0.13267500 | 0.13268900 | 0.13270500 | 0.13266000 |
| 0.14693100 | 0.14738500 | 0.14791700 | 0.14853700 | 0.14925200 | 0.15003100 | 0.15077800 | 0.15141400 | 0.15191300 | 0.15227000 | 0.15248700 | 0.15255400 | 0.15250400 | 0.15244600 |
| 0.13630600 | 0.13666000 | 0.13713700 | 0.13781000 | 0.13859200 | 0.13935700 | 0.14003700 | 0.14065000 | 0.14120200 | 0.14159400 | 0.14175100 | 0.14175600 | 0.14171900 | 0.14165200 |
| 0.12235900 | 0.12271500 | 0.12314800 | 0.12371300 | 0.12438900 | 0.12508300 | 0.12572000 | 0.12628600 | 0.12677900 | 0.12716000 | 0.12738600 | 0.12743200 | 0.12731800 | 0.12715600 |
| 0.06948100 | 0.06969800 | 0.07001300 | 0.07039000 | 0.07080200 | 0.07122900 | 0.07160900 | 0.07188400 | 0.07207800 | 0.07222300 | 0.07229100 | 0.07227900 | 0.07225700 | 0.07226200 |
| 0.07733000 | 0.07752700 | 0.07781400 | 0.07822100 | 0.07872600 | 0.07926700 | 0.07974800 | 0.08011500 | 0.08037200 | 0.08051300 | 0.08056200 | 0.08057400 | 0.08055800 | 0.08052000 |
| 0.09821300 | 0.09848200 | 0.09884300 | 0.09933400 | 0.09992200 | 0.10050500 | 0.10099500 | 0.10138000 | 0.10167600 | 0.10188100 | 0.10200900 | 0.10208700 | 0.10211400 | 0.10207700 |

| 5698       | 5700       | 5702       | 5704       | 5706       | 5708       | 5710       | 5712       | 5713       | 5715       | 5717       | 5719       | 5721       | 5723       |
|------------|------------|------------|------------|------------|------------|------------|------------|------------|------------|------------|------------|------------|------------|
| 0.14827900 | 0.14799400 | 0.14761200 | 0.14720300 | 0.14681800 | 0.14640400 | 0.14592800 | 0.14549500 | 0.14522500 | 0.14510100 | 0.14504100 | 0.14504900 | 0.14516200 | 0.14537200 |
| 0.13703200 | 0.13671800 | 0.13627900 | 0.13581100 | 0.13538300 | 0.13499500 | 0.13464400 | 0.13435000 | 0.13412800 | 0.13396400 | 0.13385600 | 0.13382300 | 0.13387500 | 0.13402700 |
| 0.15415400 | 0.15390100 | 0.15349300 | 0.15300000 | 0.15252400 | 0.15209700 | 0.15170500 | 0.15136900 | 0.15110400 | 0.15088800 | 0.15075700 | 0.15077500 | 0.15094200 | 0.15121400 |
| 0.15258400 | 0.15236800 | 0.15209700 | 0.15172700 | 0.15123300 | 0.15066700 | 0.15015800 | 0.14981000 | 0.14962700 | 0.14952200 | 0.14941900 | 0.14933400 | 0.14935700 | 0.14955700 |
| 0.09840500 | 0.09830400 | 0.09800600 | 0.09763000 | 0.09731300 | 0.09705100 | 0.09680100 | 0.09658800 | 0.09643400 | 0.09632100 | 0.09624400 | 0.09621900 | 0.09625500 | 0.09637100 |
| 0.14929100 | 0.14900600 | 0.14861900 | 0.14818500 | 0.14778300 | 0.14744700 | 0.14713000 | 0.14675900 | 0.14636400 | 0.14605100 | 0.14588500 | 0.14589500 | 0.14609500 | 0.14642800 |
| 0.15064900 | 0.15041100 | 0.14996500 | 0.14942200 | 0.14892200 | 0.14848600 | 0.14806800 | 0.14771400 | 0.14750600 | 0.14743000 | 0.14740700 | 0.14737700 | 0.14736300 | 0.14748200 |
| 0.12372200 | 0.12356100 | 0.12326900 | 0.12288100 | 0.12242400 | 0.12193100 | 0.12151100 | 0.12125400 | 0.12112000 | 0.12105400 | 0.12106000 | 0.12108700 | 0.12110100 | 0.12121200 |
| 0.14215200 | 0.14186300 | 0.14147900 | 0.14099600 | 0.14049000 | 0.14005300 | 0.13971100 | 0.13943400 | 0.13919800 | 0.13903200 | 0.13895700 | 0.13894500 | 0.13899200 | 0.13915800 |
| 0.13253200 | 0.13233000 | 0.13203800 | 0.13165900 | 0.13123600 | 0.13079800 | 0.13039000 | 0.13009100 | 0.12988700 | 0.12971600 | 0.12960500 | 0.12961700 | 0.12973700 | 0.12993800 |
| 0.15238500 | 0.15216500 | 0.15171000 | 0.15114700 | 0.15063400 | 0.15021400 | 0.14985800 | 0.14954500 | 0.14929600 | 0.14912600 | 0.14902600 | 0.14900200 | 0.14907200 | 0.14926000 |
| 0.14151800 | 0.14127100 | 0.14085700 | 0.14033300 | 0.13984200 | 0.13942000 | 0.13899800 | 0.13860700 | 0.13834900 | 0.13822700 | 0.13818500 | 0.13821600 | 0.13834500 | 0.13856300 |
| 0.12705400 | 0.12696100 | 0.12672600 | 0.12629300 | 0.12576100 | 0.12525900 | 0.12485400 | 0.12454600 | 0.12432800 | 0.12421700 | 0.12421400 | 0.12429100 | 0.12442800 | 0.12461200 |
| 0.07224900 | 0.07214900 | 0.07195200 | 0.07170700 | 0.07146800 | 0.07126100 | 0.07106200 | 0.07084900 | 0.07067100 | 0.07058300 | 0.07055400 | 0.07054800 | 0.07060700 | 0.07076000 |
| 0.08046800 | 0.08035100 | 0.08011300 | 0.07980300 | 0.07952100 | 0.07928700 | 0.07907700 | 0.07892300 | 0.07887200 | 0.07889300 | 0.07891000 | 0.07890500 | 0.07891700 | 0.07898000 |
| 0.10197000 | 0.10177800 | 0.10147200 | 0.10105800 | 0.10064500 | 0.10035500 | 0.10018700 | 0.10005400 | 0.09992300 | 0.09981600 | 0.09975700 | 0.09975000 | 0.09979000 | 0.09988200 |



| 5725       | 5727       | 5729       | 5731       | 5733       | 5735       | 5737       | 5739       | 5740       | 5742       | 5744       | 5746       | 5748       | 5750       |
|------------|------------|------------|------------|------------|------------|------------|------------|------------|------------|------------|------------|------------|------------|
| 0.14567500 | 0.14610600 | 0.14666900 | 0.14729600 | 0.14787000 | 0.14831700 | 0.14865500 | 0.14890900 | 0.14905400 | 0.14907200 | 0.14902800 | 0.14905600 | 0.14926300 | 0.14970600 |
| 0.13432500 | 0.13479300 | 0.13539300 | 0.13604100 | 0.13664000 | 0.13713600 | 0.13749400 | 0.13766200 | 0.13764700 | 0.13755600 | 0.13751600 | 0.13762600 | 0.13793900 | 0.13847000 |
| 0.15155500 | 0.15193800 | 0.15235900 | 0.15284000 | 0.15338600 | 0.15394600 | 0.15441700 | 0.15470400 | 0.15478300 | 0.15471000 | 0.15461300 | 0.15466000 | 0.15495800 | 0.15549200 |
| 0.14991600 | 0.15036900 | 0.15089200 | 0.15147400 | 0.15207700 | 0.15265900 | 0.15316800 | 0.15351200 | 0.15362700 | 0.15356400 | 0.15345900 | 0.15345300 | 0.15365900 | 0.15414900 |
| 0.09659300 | 0.09692300 | 0.09732900 | 0.09775900 | 0.09814600 | 0.09841500 | 0.09854300 | 0.09858300 | 0.09860400 | 0.09862000 | 0.09862900 | 0.09869000 | 0.09888800 | 0.09924900 |
| 0.14682600 | 0.14729100 | 0.14783200 | 0.14839300 | 0.14891800 | 0.14940800 | 0.14982300 | 0.15006400 | 0.15012600 | 0.15011400 | 0.15009300 | 0.15010400 | 0.15025200 | 0.15066800 |
| 0.14780900 | 0.14828600 | 0.14883800 | 0.14944300 | 0.15008500 | 0.15067300 | 0.15106300 | 0.15120700 | 0.15120500 | 0.15118500 | 0.15122800 | 0.15140100 | 0.15175500 | 0.15230500 |
| 0.12150900 | 0.12192000 | 0.12236200 | 0.12281100 | 0.12322500 | 0.12358700 | 0.12391200 | 0.12414800 | 0.12422700 | 0.12419200 | 0.12416600 | 0.12425800 | 0.12450900 | 0.12490800 |
| 0.13948000 | 0.13992600 | 0.14047000 | 0.14109600 | 0.14175100 | 0.14234100 | 0.14277300 | 0.14297100 | 0.14296400 | 0.14290000 | 0.14289900 | 0.14300300 | 0.14328100 | 0.14382600 |
| 0.13022200 | 0.13058900 | 0.13106500 | 0.13167800 | 0.13234600 | 0.13290000 | 0.13324900 | 0.13340500 | 0.13338100 | 0.13322500 | 0.13308300 | 0.13313500 | 0.13346500 | 0.13407000 |
| 0.14956800 | 0.14998000 | 0.15050700 | 0.15114400 | 0.15180200 | 0.15237600 | 0.15280100 | 0.15302100 | 0.15303800 | 0.15294400 | 0.15284500 | 0.15287400 | 0.15318500 | 0.15382300 |
| 0.13883500 | 0.13919000 | 0.13971800 | 0.14042000 | 0.14114200 | 0.14173400 | 0.14214300 | 0.14233500 | 0.14230600 | 0.14215900 | 0.14205200 | 0.14210500 | 0.14238300 | 0.14290100 |
| 0.12483900 | 0.12514500 | 0.12558600 | 0.12615800 | 0.12676400 | 0.12726800 | 0.12758900 | 0.12771900 | 0.12770700 | 0.12765100 | 0.12766000 | 0.12777500 | 0.12799800 | 0.12839200 |
| 0.07096800 | 0.07120800 | 0.07149000 | 0.07178300 | 0.07203200 | 0.07223800 | 0.07240200 | 0.07248700 | 0.07250400 | 0.07251200 | 0.07253700 | 0.07261100 | 0.07280100 | 0.07312900 |
| 0.07911300 | 0.07934200 | 0.07964900 | 0.07997500 | 0.08026500 | 0.08048700 | 0.08064300 | 0.08076000 | 0.08084400 | 0.08088900 | 0.08090700 | 0.08092300 | 0.08099300 | 0.08121000 |
| 0.10004600 | 0.10029000 | 0.10060100 | 0.10095700 | 0.10133600 | 0.10171300 | 0.10203800 | 0.10226000 | 0.10236000 | 0.10236300 | 0.10234700 | 0.10242400 | 0.10265600 | 0.10303100 |

| 5752       | 5754       | 5756       | 5758       | 5760       | 5762       | 5764       | 5766       | 5767       | 5769       | 5771       | 5773       | 5775       | 5777       |
|------------|------------|------------|------------|------------|------------|------------|------------|------------|------------|------------|------------|------------|------------|
| 0.15045400 | 0.15155200 | 0.15294200 | 0.15449500 | 0.15607800 | 0.15761700 | 0.15914100 | 0.16070900 | 0.16228400 | 0.16373000 | 0.16494600 | 0.16597500 | 0.16694100 | 0.16792800 |
| 0.13925700 | 0.14035600 | 0.14175600 | 0.14334700 | 0.14498700 | 0.14659200 | 0.14814300 | 0.14966400 | 0.15116800 | 0.15258600 | 0.15383400 | 0.15494200 | 0.15600700 | 0.15706000 |
| 0.15622800 | 0.15721000 | 0.15846900 | 0.15993000 | 0.16146400 | 0.16300300 | 0.16453900 | 0.16604600 | 0.16747900 | 0.16881400 | 0.17003200 | 0.17111700 | 0.17210500 | 0.17307000 |
| 0.15494900 | 0.15604600 | 0.15741000 | 0.15899600 | 0.16071000 | 0.16241100 | 0.16401400 | 0.16556200 | 0.16709500 | 0.16851700 | 0.16971000 | 0.17072300 | 0.17173400 | 0.17283500 |
| 0.09976000 | 0.10042400 | 0.10124400 | 0.10219800 | 0.10325800 | 0.10438000 | 0.10548900 | 0.10653200 | 0.10749300 | 0.10835300 | 0.10911700 | 0.10985100 | 0.11059800 | 0.11131500 |
| 0.15142000 | 0.15250500 | 0.15387000 | 0.15540500 | 0.15696700 | 0.15850900 | 0.16009800 | 0.16174600 | 0.16333800 | 0.16476900 | 0.16603800 | 0.16719700 | 0.16829500 | 0.16934800 |
| 0.15306200 | 0.15408000 | 0.15540700 | 0.15697500 | 0.15862500 | 0.16025600 | 0.16186000 | 0.16344300 | 0.16499700 | 0.16649300 | 0.16783500 | 0.16896200 | 0.16997700 | 0.17104600 |
| 0.12549100 | 0.12634300 | 0.12745300 | 0.12871600 | 0.13006500 | 0.13146300 | 0.13285700 | 0.13422400 | 0.13556700 | 0.13680600 | 0.13786300 | 0.13880200 | 0.13972000 | 0.14061800 |
| 0.14465500 | 0.14573700 | 0.14705400 | 0.14854900 | 0.15013500 | 0.15177600 | 0.15343500 | 0.15503500 | 0.15655100 | 0.15797900 | 0.15927300 | 0.16040900 | 0.16143800 | 0.16245200 |
| 0.13492000 | 0.13597100 | 0.13715600 | 0.13842700 | 0.13979500 | 0.14127900 | 0.14280800 | 0.14427400 | 0.14564300 | 0.14691800 | 0.14807200 | 0.14909400 | 0.15002900 | 0.15093700 |
| 0.15471400 | 0.15581400 | 0.15715800 | 0.15870000 | 0.16029000 | 0.16188100 | 0.16354000 | 0.16524500 | 0.16689600 | 0.16840800 | 0.16968500 | 0.17071100 | 0.17165700 | 0.17268600 |
| 0.14366100 | 0.14470500 | 0.14607100 | 0.14767800 | 0.14933000 | 0.15091300 | 0.15252400 | 0.15423500 | 0.15588300 | 0.15730100 | 0.15851600 | 0.15959900 | 0.16059500 | 0.16157000 |
| 0.12905800 | 0.13004400 | 0.13130200 | 0.13271900 | 0.13420300 | 0.13571200 | 0.13718500 | 0.13855400 | 0.13984600 | 0.14113300 | 0.14237500 | 0.14346900 | 0.14443100 | 0.14535800 |
| 0.07356400 | 0.07410000 | 0.07474100 | 0.07545400 | 0.07620700 | 0.07698900 | 0.07779600 | 0.07861000 | 0.07941100 | 0.08016500 | 0.08082200 | 0.08138400 | 0.08188800 | 0.08234400 |
| 0.08164600 | 0.08230000 | 0.08311500 | 0.08400100 | 0.08489400 | 0.08578100 | 0.08667800 | 0.08761000 | 0.08855000 | 0.08939700 | 0.09010400 | 0.09072200 | 0.09130800 | 0.09187900 |
| 0.10355900 | 0.10429700 | 0.10526200 | 0.10640200 | 0.10759600 | 0.10871400 | 0.10971600 | 0.11067900 | 0.11167300 | 0.11266900 | 0.11360600 | 0.11449500 | 0.11534800 | 0.11614000 |

| 5779       | 5781       | 5783       | 5785       | 5787       | 5789       | 5791       | 5793       | 5794       | 5796       | 5798       | 5800       | 5802       | 5804       |
|------------|------------|------------|------------|------------|------------|------------|------------|------------|------------|------------|------------|------------|------------|
| 0.16893600 | 0.16978700 | 0.17002900 | 0.16916300 | 0.16710700 | 0.16430500 | 0.16145100 | 0.15915100 | 0.15770200 | 0.15707400 | 0.15710000 | 0.15756900 | 0.15818700 | 0.15867000 |
| 0.15808200 | 0.15891500 | 0.15909600 | 0.15812100 | 0.15597500 | 0.15315600 | 0.15032200 | 0.14801900 | 0.14653400 | 0.14589300 | 0.14597900 | 0.14657100 | 0.14733000 | 0.14790400 |
| 0.17402900 | 0.17481300 | 0.17499400 | 0.17414000 | 0.17217700 | 0.16948800 | 0.16673700 | 0.16451200 | 0.16307300 | 0.16244000 | 0.16248700 | 0.16296800 | 0.16359400 | 0.16409500 |
| 0.17392300 | 0.17473800 | 0.17488600 | 0.17396800 | 0.17190400 | 0.16908300 | 0.16618900 | 0.16387800 | 0.16245600 | 0.16184100 | 0.16184500 | 0.16228800 | 0.16292300 | 0.16346000 |
| 0.11194400 | 0.11241700 | 0.11251700 | 0.11193700 | 0.11060300 | 0.10881100 | 0.10701400 | 0.10556500 | 0.10463200 | 0.10421100 | 0.10419900 | 0.10445700 | 0.10483100 | 0.10513800 |
| 0.17033200 | 0.17111600 | 0.17132900 | 0.17047800 | 0.16841000 | 0.16558000 | 0.16273800 | 0.16046300 | 0.15901400 | 0.15840500 | 0.15846800 | 0.15893800 | 0.15954000 | 0.16002300 |
| 0.17215900 | 0.17301800 | 0.17315800 | 0.17221800 | 0.17016200 | 0.16735100 | 0.16445100 | 0.16209500 | 0.16058300 | 0.15992100 | 0.15997400 | 0.16051000 | 0.16121400 | 0.16177700 |
| 0.14145000 | 0.14208900 | 0.14222200 | 0.14147400 | 0.13973100 | 0.13731200 | 0.13483300 | 0.13285100 | 0.13158400 | 0.13102400 | 0.13110000 | 0.13160200 | 0.13218500 | 0.13259300 |
| 0.16350000 | 0.16437700 | 0.16456400 | 0.16358200 | 0.16144200 | 0.15864700 | 0.15584100 | 0.15352600 | 0.15197300 | 0.15125400 | 0.15127400 | 0.15178700 | 0.15246900 | 0.15301200 |
| 0.15181900 | 0.15254200 | 0.15275100 | 0.15200500 | 0.15018100 | 0.14765400 | 0.14503700 | 0.14287400 | 0.14148000 | 0.14088700 | 0.14091400 | 0.14133600 | 0.14195800 | 0.14256200 |
| 0.17372900 | 0.17453800 | 0.17471300 | 0.17382200 | 0.17177400 | 0.16899100 | 0.16613000 | 0.16376500 | 0.16221400 | 0.16154000 | 0.16159900 | 0.16208700 | 0.16271200 | 0.16324800 |
| 0.16252900 | 0.16327700 | 0.16340600 | 0.16251600 | 0.16051400 | 0.15775600 | 0.15490400 | 0.15258900 | 0.15112800 | 0.15052800 | 0.15062300 | 0.15115200 | 0.15182100 | 0.15235400 |
| 0.14625600 | 0.14697700 | 0.14719200 | 0.14648900 | 0.14471900 | 0.14219200 | 0.13952000 | 0.13731000 | 0.13591800 | 0.13535300 | 0.13540600 | 0.13583100 | 0.13640300 | 0.13688300 |
| 0.08275800 | 0.08309600 | 0.08315700 | 0.08269900 | 0.08169900 | 0.08034800 | 0.07893800 | 0.07777300 | 0.07704600 | 0.07677100 | 0.07684100 | 0.07711500 | 0.07746500 | 0.07775700 |
| 0.09240800 | 0.09280200 | 0.09287900 | 0.09241700 | 0.09132200 | 0.08979300 | 0.08824500 | 0.08702400 | 0.08623900 | 0.08585400 | 0.08581700 | 0.08603000 | 0.08632300 | 0.08655800 |
| 0.11683600 | 0.11731900 | 0.11733100 | 0.11664000 | 0.11524900 | 0.11341600 | 0.11153600 | 0.10995000 | 0.10886000 | 0.10837100 | 0.10843400 | 0.10881400 | 0.10922900 | 0.10949800 |

| 5806       | 5808       | 5810       | 5812       | 5814       | 5816       | 5818       | 5820       | 5821       | 5823       | 5825       | 5827       | 5829       | 5831       |
|------------|------------|------------|------------|------------|------------|------------|------------|------------|------------|------------|------------|------------|------------|
| 0.15885800 | 0.15863500 | 0.15789000 | 0.15662600 | 0.15501500 | 0.15335400 | 0.15193200 | 0.15086500 | 0.15015500 | 0.14980700 | 0.14977300 | 0.14995800 | 0.15035000 | 0.15099600 |
| 0.14807000 | 0.14773400 | 0.14686400 | 0.14551100 | 0.14387100 | 0.14224400 | 0.14086400 | 0.13981400 | 0.13911600 | 0.13876400 | 0.13869800 | 0.13887600 | 0.13930800 | 0.13999100 |
| 0.16428500 | 0.16403100 | 0.16322800 | 0.16191900 | 0.16036800 | 0.15888000 | 0.15761900 | 0.15662600 | 0.15591100 | 0.15549200 | 0.15538500 | 0.15557100 | 0.15600200 | 0.15665000 |
| 0.16367100 | 0.16343000 | 0.16267900 | 0.16138600 | 0.15967000 | 0.15787900 | 0.15636700 | 0.15526400 | 0.15455300 | 0.15422400 | 0.15424100 | 0.15450100 | 0.15495900 | 0.15565900 |
| 0.10519300 | 0.10490900 | 0.10434200 | 0.10356600 | 0.10260700 | 0.10156600 | 0.10062300 | 0.09993000 | 0.09950600 | 0.09925500 | 0.09914600 | 0.09925100 | 0.09957800 | 0.10005000 |
| 0.16020800 | 0.15997200 | 0.15920100 | 0.15787800 | 0.15621400 | 0.15456600 | 0.15319100 | 0.15214000 | 0.15138200 | 0.15095200 | 0.15090900 | 0.15120300 | 0.15171200 | 0.15237300 |
| 0.16197000 | 0.16163100 | 0.16073600 | 0.15942500 | 0.15787100 | 0.15625800 | 0.15480700 | 0.15367000 | 0.15288200 | 0.15244800 | 0.15237200 | 0.15262100 | 0.15311100 | 0.15376600 |
| 0.13272200 | 0.13250300 | 0.13186000 | 0.13078600 | 0.12944600 | 0.12810800 | 0.12694000 | 0.12599600 | 0.12533400 | 0.12499100 | 0.12493800 | 0.12513100 | 0.12551400 | 0.12603400 |
| 0.15317700 | 0.15285700 | 0.15203800 | 0.15076700 | 0.14921200 | 0.14764600 | 0.14629600 | 0.14525000 | 0.14450700 | 0.14405100 | 0.14387400 | 0.14401000 | 0.14450100 | 0.14529200 |
| 0.14286600 | 0.14262900 | 0.14178300 | 0.14047000 | 0.13894700 | 0.13744800 | 0.13613600 | 0.13515300 | 0.13456100 | 0.13427900 | 0.13421500 | 0.13435600 | 0.13470200 | 0.13525700 |
| 0.16345000 | 0.16314400 | 0.16230900 | 0.16099500 | 0.15934100 | 0.15765200 | 0.15623800 | 0.15521600 | 0.15454000 | 0.15415200 | 0.15405800 | 0.15426900 | 0.15473400 | 0.15536700 |
| 0.15253200 | 0.15224000 | 0.15145900 | 0.15019400 | 0.14853400 | 0.14675600 | 0.14520800 | 0.14408200 | 0.14339900 | 0.14310300 | 0.14311100 | 0.14336000 | 0.14383200 | 0.14449600 |
| 0.13705000 | 0.13677400 | 0.13601300 | 0.13479700 | 0.13330500 | 0.13183500 | 0.13061500 | 0.12970700 | 0.12910800 | 0.12879700 | 0.12872600 | 0.12887700 | 0.12926400 | 0.12987100 |
| 0.07787500 | 0.07774200 | 0.07729400 | 0.07653700 | 0.07563200 | 0.07478000 | 0.07408100 | 0.07354900 | 0.07319400 | 0.07300700 | 0.07294700 | 0.07299000 | 0.07316800 | 0.07350000 |
| 0.08664600 | 0.08649400 | 0.08604100 | 0.08530600 | 0.08437000 | 0.08339400 | 0.08258600 | 0.08203000 | 0.08167200 | 0.08146000 | 0.08137700 | 0.08141500 | 0.08160700 | 0.08198100 |
| 0.10954600 | 0.10931800 | 0.10875600 | 0.10787400 | 0.10677400 | 0.10561900 | 0.10459400 | 0.10383500 | 0.10337800 | 0.10318600 | 0.10318500 | 0.10331600 | 0.10357700 | 0.10399000 |

| 5833       | 5835       | 5837       | 5839       | 5841       | 5843       | 5845       | 5847       | 5848       | 5850       | 5852       | 5854       | 5856       | 5858       |
|------------|------------|------------|------------|------------|------------|------------|------------|------------|------------|------------|------------|------------|------------|
| 0.15187700 | 0.15295600 | 0.15420200 | 0.15546600 | 0.15652100 | 0.15724400 | 0.15766900 | 0.15791400 | 0.15805300 | 0.15813700 | 0.15830400 | 0.15870200 | 0.15933400 | 0.16012500 |
| 0.14087000 | 0.14186600 | 0.14292800 | 0.14405400 | 0.14519900 | 0.14616400 | 0.14674600 | 0.14695900 | 0.14697900 | 0.14700000 | 0.14717700 | 0.14758500 | 0.14821600 | 0.14902700 |
| 0.15749200 | 0.15848100 | 0.15955500 | 0.16065000 | 0.16169600 | 0.16256500 | 0.16312800 | 0.16337500 | 0.16342800 | 0.16345800 | 0.16361900 | 0.16401700 | 0.16468300 | 0.16552900 |
| 0.15659800 | 0.15768100 | 0.15881300 | 0.15992400 | 0.16094400 | 0.16179400 | 0.16239400 | 0.16270500 | 0.16278500 | 0.16278700 | 0.16291600 | 0.16332400 | 0.16401600 | 0.16487300 |
| 0.10064700 | 0.10138400 | 0.10217900 | 0.10289100 | 0.10345900 | 0.10388200 | 0.10416700 | 0.10436300 | 0.10451800 | 0.10464300 | 0.10479700 | 0.10508000 | 0.10552100 | 0.10607900 |
| 0.15316600 | 0.15408800 | 0.15514600 | 0.15626500 | 0.15728000 | 0.15805600 | 0.15858300 | 0.15892400 | 0.15913800 | 0.15928500 | 0.15948600 | 0.15990100 | 0.16058600 | 0.16144500 |
| 0.15456600 | 0.15551500 | 0.15661200 | 0.15780900 | 0.15895800 | 0.15986600 | 0.16045200 | 0.16079800 | 0.16100800 | 0.16112500 | 0.16125400 | 0.16159000 | 0.16225000 | 0.16314900 |
| 0.12668700 | 0.12750100 | 0.12847100 | 0.12952400 | 0.13050800 | 0.13124000 | 0.13163000 | 0.13177700 | 0.13186400 | 0.13198700 | 0.13217500 | 0.13249400 | 0.13300800 | 0.13370000 |
| 0.14623400 | 0.14723900 | 0.14833400 | 0.14950700 | 0.15061900 | 0.15145800 | 0.15194000 | 0.15221400 | 0.15243600 | 0.15261600 | 0.15280200 | 0.15314700 | 0.15373600 | 0.15452500 |
| 0.13605400 | 0.13705600 | 0.13813600 | 0.13919300 | 0.14018100 | 0.14097800 | 0.14144400 | 0.14163100 | 0.14175600 | 0.14196700 | 0.14226600 | 0.14265300 | 0.14319000 | 0.14389700 |
| 0.15615300 | 0.15715000 | 0.15836900 | 0.15968200 | 0.16087500 | 0.16176400 | 0.16230900 | 0.16260700 | 0.16273800 | 0.16275700 | 0.16283300 | 0.16318800 | 0.16387300 | 0.16477400 |
| 0.14531500 | 0.14627600 | 0.14737300 | 0.14853800 | 0.14961900 | 0.15045400 | 0.15097600 | 0.15122800 | 0.15133800 | 0.15146700 | 0.15173400 | 0.15221000 | 0.15292800 | 0.15381300 |
| 0.13062900 | 0.13150100 | 0.13250400 | 0.13359300 | 0.13459400 | 0.13533800 | 0.13579100 | 0.13602700 | 0.13612700 | 0.13620500 | 0.13641700 | 0.13684400 | 0.13745700 | 0.13819400 |
| 0.07392700 | 0.07439600 | 0.07493900 | 0.07558100 | 0.07621300 | 0.07666000 | 0.07687800 | 0.07698800 | 0.07709400 | 0.07720100 | 0.07729700 | 0.07743000 | 0.07769800 | 0.07815000 |
| 0.08251200 | 0.08317000 | 0.08392800 | 0.08468500 | 0.08528800 | 0.08566600 | 0.08586900 | 0.08598700 | 0.08608100 | 0.08618100 | 0.08633300 | 0.08656600 | 0.08689300 | 0.08732300 |
| 0.10454800 | 0.10522600 | 0.10599200 | 0.10681100 | 0.10760000 | 0.10823100 | 0.10864500 | 0.10888800 | 0.10903600 | 0.10916300 | 0.10934000 | 0.10960600 | 0.10997800 | 0.11048700 |

| 5860       | 5862       | 5864       | 5866       | 5868       | 5870       | 5872       | 5874       | 5875       | 5877       | 5879       | 5881       | 5883       | 5885       |
|------------|------------|------------|------------|------------|------------|------------|------------|------------|------------|------------|------------|------------|------------|
| 0.16097800 | 0.16178700 | 0.16254400 | 0.16335500 | 0.16425200 | 0.16506700 | 0.16559400 | 0.16583200 | 0.16598300 | 0.16626700 | 0.16682100 | 0.16767600 | 0.16879000 | 0.17010900 |
| 0.14995800 | 0.15095900 | 0.15197300 | 0.15287700 | 0.15357100 | 0.15410800 | 0.15454800 | 0.15487300 | 0.15512700 | 0.15544200 | 0.15595600 | 0.15677500 | 0.15796100 | 0.15945300 |
| 0.16640100 | 0.16721900 | 0.16800900 | 0.16876200 | 0.16940200 | 0.16990900 | 0.17032700 | 0.17067100 | 0.17098600 | 0.17138900 | 0.17198300 | 0.17281500 | 0.17391800 | 0.17528600 |
| 0.16579900 | 0.16676000 | 0.16768100 | 0.16847700 | 0.16916000 | 0.16974200 | 0.17016200 | 0.17042900 | 0.17068900 | 0.17109400 | 0.17170800 | 0.17255500 | 0.17368100 | 0.17511500 |
| 0.10667500 | 0.10724700 | 0.10781600 | 0.10840900 | 0.10896900 | 0.10941000 | 0.10969300 | 0.10986100 | 0.11002000 | 0.11024500 | 0.11057300 | 0.11104300 | 0.11169700 | 0.11253500 |
| 0.16234300 | 0.16321100 | 0.16405700 | 0.16488200 | 0.16562800 | 0.16622700 | 0.16664700 | 0.16692400 | 0.16717700 | 0.16752900 | 0.16808500 | 0.16895600 | 0.17016600 | 0.17159700 |
| 0.16409100 | 0.16498200 | 0.16588400 | 0.16682800 | 0.16771800 | 0.16842700 | 0.16888800 | 0.16916100 | 0.16939400 | 0.16972500 | 0.17027400 | 0.17116300 | 0.17239300 | 0.17383500 |
| 0.13447800 | 0.13523700 | 0.13596600 | 0.13669200 | 0.13735700 | 0.13786000 | 0.13817400 | 0.13838200 | 0.13864200 | 0.13905500 | 0.13961000 | 0.14029500 | 0.14117800 | 0.14232300 |
| 0.15544200 | 0.15643600 | 0.15744400 | 0.15837200 | 0.15911500 | 0.15963800 | 0.15999500 | 0.16028300 | 0.16059400 | 0.16097600 | 0.16149400 | 0.16230000 | 0.16348700 | 0.16493800 |
| 0.14469600 | 0.14549700 | 0.14629700 | 0.14712400 | 0.14790400 | 0.14848400 | 0.14881500 | 0.14901800 | 0.14925100 | 0.14961500 | 0.15019700 | 0.15106400 | 0.15217700 | 0.15343900 |
| 0.16577600 | 0.16679200 | 0.16774600 | 0.16860300 | 0.16936400 | 0.16998800 | 0.17039900 | 0.17061900 | 0.17080700 | 0.17112400 | 0.17166000 | 0.17250600 | 0.17373000 | 0.17526200 |
| 0.15472200 | 0.15558500 | 0.15642000 | 0.15723100 | 0.15795800 | 0.15851800 | 0.15888600 | 0.15914500 | 0.15943700 | 0.15987800 | 0.16053500 | 0.16143900 | 0.16257800 | 0.16392200 |
| 0.13899900 | 0.13983100 | 0.14066800 | 0.14146000 | 0.14214100 | 0.14267700 | 0.14307200 | 0.14337200 | 0.14364900 | 0.14398000 | 0.14447300 | 0.14523000 | 0.14625700 | 0.14749600 |
| 0.07869400 | 0.07920000 | 0.07962900 | 0.08000100 | 0.08033700 | 0.08062600 | 0.08083500 | 0.08101700 | 0.08126800 | 0.08156100 | 0.08184900 | 0.08220700 | 0.08270300 | 0.08332000 |
| 0.08782400 | 0.08835400 | 0.08890100 | 0.08943600 | 0.08989400 | 0.09022900 | 0.09045600 | 0.09064200 | 0.09082900 | 0.09102300 | 0.09129900 | 0.09176600 | 0.09242800 | 0.09321900 |
| 0.11113400 | 0.11180900 | 0.11240300 | 0.11293900 | 0.11345800 | 0.11392000 | 0.11428200 | 0.11456700 | 0.11484200 | 0.11516000 | 0.11558100 | 0.11617600 | 0.11697500 | 0.11794900 |

| 5887       | 5889       | 5891       | 5893       | 5895       | 5897       | 5899       | 5901       | 5902       | 5904       | 5906       | 5908       | 5910       | 5912       |
|------------|------------|------------|------------|------------|------------|------------|------------|------------|------------|------------|------------|------------|------------|
| 0.17156000 | 0.17303500 | 0.17442000 | 0.17567700 | 0.17690700 | 0.17826300 | 0.17973200 | 0.18107600 | 0.18205700 | 0.18264600 | 0.18298200 | 0.18326100 | 0.18368500 | 0.18443100 |
| 0.16105200 | 0.16254700 | 0.16389700 | 0.16518800 | 0.16647800 | 0.16782100 | 0.16923100 | 0.17054400 | 0.17154200 | 0.17220200 | 0.17265600 | 0.17303500 | 0.17347800 | 0.17418500 |
| 0.17678100 | 0.17820700 | 0.17950200 | 0.18072200 | 0.18192700 | 0.18319500 | 0.18456900 | 0.18589800 | 0.18690400 | 0.18747000 | 0.18775800 | 0.18803400 | 0.18847500 | 0.18920000 |
| 0.17677300 | 0.17843700 | 0.17992300 | 0.18125400 | 0.18258700 | 0.18399800 | 0.18540700 | 0.18667500 | 0.18765300 | 0.18827200 | 0.18863300 | 0.18893500 | 0.18939000 | 0.19019900 |
| 0.11349000 | 0.11448000 | 0.11544400 | 0.11631800 | 0.11712000 | 0.11801400 | 0.11907500 | 0.12010600 | 0.12085000 | 0.12125200 | 0.12145300 | 0.12164500 | 0.12194600 | 0.12244000 |
| 0.17308800 | 0.17451300 | 0.17581600 | 0.17704800 | 0.17834600 | 0.17981700 | 0.18137100 | 0.18272000 | 0.18365000 | 0.18419200 | 0.18451000 | 0.18481100 | 0.18531800 | 0.18617900 |
| 0.17535400 | 0.17686200 | 0.17830500 | 0.17966500 | 0.18096500 | 0.18231400 | 0.18379200 | 0.18524000 | 0.18636500 | 0.18702700 | 0.18731600 | 0.18748700 | 0.18785000 | 0.18866800 |
| 0.14364200 | 0.14490000 | 0.14594000 | 0.14685400 | 0.14787300 | 0.14913200 | 0.15054200 | 0.15184100 | 0.15279100 | 0.15332500 | 0.15355600 | 0.15371700 | 0.15404600 | 0.15468400 |
| 0.16645500 | 0.16792900 | 0.16932100 | 0.17064900 | 0.17201300 | 0.17350200 | 0.17505400 | 0.17645000 | 0.17745600 | 0.17799700 | 0.17822300 | 0.17841400 | 0.17883700 | 0.17966000 |
| 0.15477800 | 0.15610200 | 0.15734900 | 0.15856700 | 0.15984700 | 0.16119300 | 0.16251100 | 0.16364400 | 0.16445800 | 0.16496700 | 0.16530400 | 0.16560700 | 0.16602900 | 0.16677500 |
| 0.17691700 | 0.17852200 | 0.17999000 | 0.18132500 | 0.18260900 | 0.18395200 | 0.18537500 | 0.18674000 | 0.18784300 | 0.18857300 | 0.18896700 | 0.18918900 | 0.18951200 | 0.19023300 |
| 0.16539800 | 0.16684800 | 0.16818700 | 0.16951300 | 0.17091700 | 0.17236900 | 0.17383900 | 0.17526200 | 0.17640700 | 0.17706300 | 0.17733200 | 0.17752200 | 0.17788600 | 0.17862600 |
| 0.14886900 | 0.15026000 | 0.15153400 | 0.15264800 | 0.15375600 | 0.15503400 | 0.15641600 | 0.15766500 | 0.15863100 | 0.15928400 | 0.15966500 | 0.15991500 | 0.16027500 | 0.16098300 |
| 0.08403400 | 0.08482100 | 0.08559500 | 0.08626000 | 0.08682100 | 0.08740300 | 0.08808100 | 0.08875300 | 0.08927000 | 0.08959500 | 0.08981000 | 0.09003700 | 0.09035900 | 0.09080600 |
| 0.09408900 | 0.09498400 | 0.09583500 | 0.09659800 | 0.09731700 | 0.09809700 | 0.09895000 | 0.09974000 | 0.10032400 | 0.10067700 | 0.10086700 | 0.10098100 | 0.10113800 | 0.10153000 |
| 0.11901800 | 0.12007000 | 0.12105500 | 0.12200300 | 0.12295900 | 0.12396500 | 0.12501600 | 0.12598600 | 0.12670400 | 0.12711400 | 0.12732100 | 0.12749200 | 0.12778000 | 0.12831600 |

| 5914       | 5916       | 5918       | 5920       | 5922       | 5924       | 5926       | 5928       | 5929       | 5931       | 5933       | 5935       | 5937       | 5939       |
|------------|------------|------------|------------|------------|------------|------------|------------|------------|------------|------------|------------|------------|------------|
| 0.18564700 | 0.18741100 | 0.18971300 | 0.19251000 | 0.19571800 | 0.19913800 | 0.20247300 | 0.20552400 | 0.20832600 | 0.21105400 | 0.21393800 | 0.21719000 | 0.22086500 | 0.22485200 |
| 0.17534900 | 0.17708900 | 0.17944800 | 0.18238100 | 0.18574300 | 0.18929800 | 0.19278100 | 0.19600300 | 0.19896200 | 0.20183400 | 0.20483600 | 0.20813400 | 0.21187400 | 0.21612500 |
| 0.19033600 | 0.19196900 | 0.19413500 | 0.19686100 | 0.20005700 | 0.20344500 | 0.20672900 | 0.20977900 | 0.21264100 | 0.21544100 | 0.21830900 | 0.22143600 | 0.22500700 | 0.22894600 |
| 0.19147500 | 0.19324900 | 0.19557100 | 0.19849100 | 0.20190600 | 0.20551400 | 0.20898500 | 0.21218100 | 0.21516000 | 0.21804700 | 0.22102200 | 0.22432200 | 0.22812600 | 0.23241400 |
| 0.12326800 | 0.12453100 | 0.12615800 | 0.12806000 | 0.13022800 | 0.13256500 | 0.13487000 | 0.13704200 | 0.13909500 | 0.14105600 | 0.14302100 | 0.14518500 | 0.14771300 | 0.15058000 |
| 0.18745100 | 0.18918100 | 0.19146000 | 0.19434800 | 0.19770400 | 0.20121700 | 0.20466500 | 0.20796000 | 0.21101900 | 0.21386800 | 0.21676200 | 0.22001100 | 0.22375000 | 0.22790700 |
| 0.19008300 | 0.19207000 | 0.19453700 | 0.19747000 | 0.20083700 | 0.20441600 | 0.20791200 | 0.21119900 | 0.21431100 | 0.21732500 | 0.22037900 | 0.22371000 | 0.22751400 | 0.23176300 |
| 0.15570100 | 0.15717000 | 0.15913500 | 0.16158600 | 0.16443100 | 0.16743900 | 0.17034900 | 0.17305600 | 0.17561900 | 0.17812100 | 0.18063800 | 0.18334600 | 0.18649800 | 0.19014000 |
| 0.18094600 | 0.18275600 | 0.18517400 | 0.18817300 | 0.19156900 | 0.19513800 | 0.19867700 | 0.20202400 | 0.20512300 | 0.20805100 | 0.21098600 | 0.21417900 | 0.21787500 | 0.22211100 |
| 0.16800000 | 0.16973700 | 0.17195000 | 0.17460500 | 0.17764500 | 0.18089400 | 0.18409200 | 0.18708500 | 0.18986500 | 0.19249900 | 0.19516800 | 0.19817100 | 0.20169000 | 0.20562900 |
| 0.19150700 | 0.19334600 | 0.19572900 | 0.19862300 | 0.20192400 | 0.20544700 | 0.20900400 | 0.21242300 | 0.21559300 | 0.21859600 | 0.22166900 | 0.22501900 | 0.22877200 | 0.23295000 |
| 0.17991300 | 0.18181900 | 0.18431600 | 0.18731400 | 0.19066600 | 0.19418900 | 0.19768000 | 0.20095400 | 0.20397200 | 0.20686900 | 0.20985100 | 0.21315600 | 0.21697200 | 0.22125200 |
| 0.16215500 | 0.16378300 | 0.16586200 | 0.16844400 | 0.17147700 | 0.17471800 | 0.17786300 | 0.18076600 | 0.18351400 | 0.18627500 | 0.18916900 | 0.19230600 | 0.19580600 | 0.19966600 |
| 0.09143900 | 0.09233400 | 0.09352800 | 0.09501500 | 0.09672900 | 0.09849900 | 0.10019300 | 0.10182300 | 0.10340300 | 0.10490300 | 0.10642700 | 0.10815400 | 0.11011900 | 0.11225400 |
| 0.10229300 | 0.10342200 | 0.10485100 | 0.10654700 | 0.10846600 | 0.11048300 | 0.11245400 | 0.11433600 | 0.11613800 | 0.11784600 | 0.11952300 | 0.12135700 | 0.12348900 | 0.12588900 |
| 0.12920700 | 0.13051600 | 0.13224800 | 0.13437200 | 0.13677900 | 0.13927500 | 0.14172900 | 0.14410500 | 0.14638100 | 0.14856800 | 0.15077500 | 0.15318900 | 0.15595000 | 0.15902600 |



| 5941       | 5943       | 5945       | 5947       | 5949       | 5951       | 5953       | 5955       | 5956       | 5958       | 5960       | 5962       | 5964       | 5966       |
|------------|------------|------------|------------|------------|------------|------------|------------|------------|------------|------------|------------|------------|------------|
| 0.22893700 | 0.23274400 | 0.23576400 | 0.23769600 | 0.23872300 | 0.23936100 | 0.24017500 | 0.24153900 | 0.24338800 | 0.24522000 | 0.24653200 | 0.24718900 | 0.24737100 | 0.24733000 |
| 0.22064300 | 0.22476400 | 0.22779500 | 0.22956700 | 0.23048400 | 0.23115100 | 0.23209500 | 0.23360600 | 0.23558900 | 0.23756700 | 0.23899900 | 0.23968600 | 0.23984300 | 0.23981000 |
| 0.23290200 | 0.23643700 | 0.23916400 | 0.24091400 | 0.24188500 | 0.24255200 | 0.24345900 | 0.24492600 | 0.24679700 | 0.24858100 | 0.24984200 | 0.25046900 | 0.25066700 | 0.25068500 |
| 0.23684500 | 0.24082100 | 0.24381500 | 0.24569400 | 0.24676400 | 0.24753600 | 0.24848500 | 0.24994300 | 0.25189200 | 0.25384600 | 0.25524600 | 0.25596900 | 0.25623900 | 0.25624800 |
| 0.15353200 | 0.15617800 | 0.15818700 | 0.15944300 | 0.16008800 | 0.16050300 | 0.16114100 | 0.16220200 | 0.16350000 | 0.16467500 | 0.16546700 | 0.16585200 | 0.16602200 | 0.16616000 |
| 0.23218900 | 0.23606300 | 0.23900900 | 0.24088900 | 0.24195100 | 0.24265300 | 0.24356600 | 0.24507300 | 0.24702400 | 0.24892700 | 0.25038600 | 0.25122400 | 0.25150300 | 0.25148900 |
| 0.23618300 | 0.24028700 | 0.24350100 | 0.24553000 | 0.24659600 | 0.24728300 | 0.24823600 | 0.24981900 | 0.25186800 | 0.25386800 | 0.25538000 | 0.25625000 | 0.25656400 | 0.25654200 |
| 0.19392900 | 0.19731100 | 0.19985000 | 0.20143200 | 0.20229000 | 0.20287600 | 0.20366700 | 0.20492400 | 0.20653700 | 0.20814500 | 0.20938800 | 0.21005600 | 0.21021700 | 0.21017700 |
| 0.22655200 | 0.23059200 | 0.23369900 | 0.23568000 | 0.23672200 | 0.23736700 | 0.23828500 | 0.23981300 | 0.24174700 | 0.24362500 | 0.24505700 | 0.24586100 | 0.24613700 | 0.24618100 |
| 0.20966000 | 0.21331300 | 0.21611500 | 0.21782400 | 0.21865500 | 0.21924200 | 0.22022500 | 0.22180900 | 0.22372500 | 0.22547500 | 0.22660800 | 0.22706200 | 0.22719200 | 0.22730900 |
| 0.23731300 | 0.24133800 | 0.24444100 | 0.24635800 | 0.24735100 | 0.24801100 | 0.24892300 | 0.25042900 | 0.25243400 | 0.25441500 | 0.25582500 | 0.25656000 | 0.25692300 | 0.25715400 |
| 0.22563900 | 0.22957300 | 0.23255200 | 0.23444400 | 0.23554800 | 0.23636200 | 0.23737000 | 0.23888100 | 0.24087300 | 0.24292700 | 0.24445100 | 0.24517900 | 0.24538400 | 0.24542900 |
| 0.20362300 | 0.20719200 | 0.20992000 | 0.21164400 | 0.21257900 | 0.21321700 | 0.21409800 | 0.21551200 | 0.21732900 | 0.21912500 | 0.22048700 | 0.22124800 | 0.22152700 | 0.22157700 |
| 0.11446700 | 0.11654400 | 0.11818100 | 0.11923400 | 0.11979000 | 0.12010300 | 0.12050400 | 0.12122600 | 0.12224000 | 0.12329100 | 0.12406700 | 0.12442800 | 0.12449100 | 0.12445900 |
| 0.12838200 | 0.13069000 | 0.13251500 | 0.13369800 | 0.13431500 | 0.13466400 | 0.13515400 | 0.13601400 | 0.13713900 | 0.13825700 | 0.13910000 | 0.13951700 | 0.13959100 | 0.13955800 |
| 0.16216900 | 0.16498000 | 0.16709000 | 0.16841100 | 0.16915100 | 0.16966800 | 0.17036600 | 0.17149300 | 0.17295400 | 0.17439500 | 0.17546000 | 0.17600900 | 0.17618100 | 0.17621100 |

| 5968       | 5970       | 5972       | 5974       | 5976       | 5978       | 5980       | 5982       | 5983       | 5985       | 5987       | 5989       | 5991       | 5993       |
|------------|------------|------------|------------|------------|------------|------------|------------|------------|------------|------------|------------|------------|------------|
| 0.24719200 | 0.24699700 | 0.24686900 | 0.24690700 | 0.24706000 | 0.24729100 | 0.24764500 | 0.24811000 | 0.24855800 | 0.24884800 | 0.24893200 | 0.24879600 | 0.24836100 | 0.24752700 |
| 0.23974000 | 0.23960300 | 0.23940600 | 0.23927000 | 0.23931600 | 0.23958800 | 0.24004000 | 0.24057500 | 0.24109000 | 0.24146900 | 0.24160800 | 0.24145300 | 0.24096500 | 0.24008900 |
| 0.25059500 | 0.25039900 | 0.25018600 | 0.25008700 | 0.25016100 | 0.25040300 | 0.25080000 | 0.25129600 | 0.25174200 | 0.25203800 | 0.25219000 | 0.25211400 | 0.25166000 | 0.25078600 |
| 0.25607500 | 0.25579700 | 0.25551200 | 0.25532400 | 0.25534200 | 0.25561600 | 0.25607000 | 0.25655400 | 0.25699900 | 0.25737800 | 0.25756000 | 0.25738200 | 0.25680000 | 0.25586300 |
| 0.16623600 | 0.16616400 | 0.16603200 | 0.16600300 | 0.16614000 | 0.16640900 | 0.16672200 | 0.16700100 | 0.16721700 | 0.16734200 | 0.16733200 | 0.16716300 | 0.16681500 | 0.16623200 |
| 0.25135900 | 0.25111700 | 0.25084300 | 0.25069600 | 0.25074600 | 0.25098700 | 0.25139400 | 0.25190000 | 0.25240200 | 0.25278100 | 0.25292200 | 0.25276100 | 0.25227800 | 0.25143600 |
| 0.25638700 | 0.25616000 | 0.25587300 | 0.25564000 | 0.25561700 | 0.25586700 | 0.25636000 | 0.25698900 | 0.25756000 | 0.25791200 | 0.25798800 | 0.25778900 | 0.25727600 | 0.25632600 |
| 0.21015400 | 0.21008600 | 0.20990200 | 0.20973300 | 0.20975400 | 0.21000600 | 0.21039800 | 0.21080900 | 0.21117500 | 0.21146300 | 0.21159500 | 0.21148700 | 0.21108600 | 0.21035600 |
| 0.24617100 | 0.24607000 | 0.24588800 | 0.24576600 | 0.24581700 | 0.24606400 | 0.24648800 | 0.24700500 | 0.24745000 | 0.24768800 | 0.24771800 | 0.24757500 | 0.24714000 | 0.24622100 |
| 0.22741200 | 0.22738400 | 0.22720600 | 0.22702600 | 0.22702600 | 0.22721600 | 0.22752300 | 0.22795700 | 0.22848000 | 0.22892600 | 0.22915600 | 0.22906600 | 0.22855600 | 0.22762000 |
| 0.25719000 | 0.25693600 | 0.25656300 | 0.25635700 | 0.25644100 | 0.25673300 | 0.25712100 | 0.25757700 | 0.25804600 | 0.25839300 | 0.25854200 | 0.25843400 | 0.25793200 | 0.25697700 |
| 0.24537300 | 0.24517700 | 0.24495600 | 0.24485300 | 0.24487000 | 0.24498100 | 0.24525200 | 0.24571900 | 0.24627600 | 0.24675700 | 0.24700400 | 0.24686900 | 0.24626900 | 0.24523900 |
| 0.22156100 | 0.22145900 | 0.22123200 | 0.22099400 | 0.22092100 | 0.22106200 | 0.22137000 | 0.22178800 | 0.22223100 | 0.22256100 | 0.22265400 | 0.22247100 | 0.22199500 | 0.22119400 |
| 0.12441600 | 0.12434100 | 0.12422200 | 0.12409300 | 0.12401200 | 0.12404000 | 0.12421500 | 0.12448600 | 0.12473700 | 0.12490200 | 0.12497500 | 0.12489700 | 0.12460400 | 0.12411100 |
| 0.13956900 | 0.13960200 | 0.13958500 | 0.13954400 | 0.13957900 | 0.13971300 | 0.13990100 | 0.14011400 | 0.14032300 | 0.14046000 | 0.14047500 | 0.14037100 | 0.14011400 | 0.13961000 |
| 0.17617000 | 0.17601200 | 0.17582000 | 0.17574300 | 0.17579200 | 0.17591400 | 0.17614100 | 0.17648900 | 0.17685700 | 0.17710400 | 0.17715100 | 0.17697200 | 0.17653200 | 0.17580300 |

| 5995       | 5997       | 5999       | 6001       | 6003       | 6005       | 6007       | 6009       | 6010       | 6012       | 6014       | 6016       | 6018       | 6020       |
|------------|------------|------------|------------|------------|------------|------------|------------|------------|------------|------------|------------|------------|------------|
| 0.24628800 | 0.24472100 | 0.24295500 | 0.24116300 | 0.23943400 | 0.23763400 | 0.23553300 | 0.23299500 | 0.23006100 | 0.22697800 | 0.22406600 | 0.22148700 | 0.21922500 | 0.21720800 |
| 0.23876600 | 0.23702700 | 0.23508800 | 0.23321800 | 0.23145000 | 0.22953500 | 0.22721700 | 0.22444900 | 0.22136900 | 0.21820200 | 0.21518000 | 0.21246900 | 0.21010600 | 0.20801800 |
| 0.24955700 | 0.24808300 | 0.24648800 | 0.24483200 | 0.24309300 | 0.24120700 | 0.23905600 | 0.23650000 | 0.23356500 | 0.23051100 | 0.22762800 | 0.22505400 | 0.22278700 | 0.22079100 |
| 0.25462100 | 0.25309400 | 0.25134800 | 0.24952900 | 0.24770700 | 0.24574300 | 0.24343600 | 0.24073200 | 0.23772800 | 0.23459800 | 0.23154900 | 0.22876100 | 0.22632700 | 0.22421900 |
| 0.16537600 | 0.16427100 | 0.16301000 | 0.16173100 | 0.16049000 | 0.15916400 | 0.15756700 | 0.15564300 | 0.15352400 | 0.15142000 | 0.14945100 | 0.14761400 | 0.14594200 | 0.14450200 |
| 0.25020700 | 0.24863000 | 0.24680700 | 0.24488300 | 0.24296400 | 0.24098900 | 0.23875700 | 0.23607700 | 0.23299300 | 0.22982700 | 0.22688100 | 0.22421200 | 0.22179600 | 0.21964500 |
| 0.25490400 | 0.25317100 | 0.25132500 | 0.24948500 | 0.24766100 | 0.24568800 | 0.24333600 | 0.24052700 | 0.23742100 | 0.23425100 | 0.23114700 | 0.22823300 | 0.22569800 | 0.22358200 |
| 0.20928800 | 0.20791900 | 0.20634700 | 0.20471600 | 0.20308900 | 0.20137400 | 0.19942300 | 0.19714000 | 0.19454600 | 0.19182200 | 0.18924600 | 0.18701200 | 0.18510500 | 0.18337200 |
| 0.24483000 | 0.24317500 | 0.24141500 | 0.23959500 | 0.23767800 | 0.23557600 | 0.23321600 | 0.23055600 | 0.22758300 | 0.22442100 | 0.22131800 | 0.21848500 | 0.21603300 | 0.21396000 |
| 0.22634800 | 0.22485500 | 0.22323800 | 0.22155500 | 0.21980400 | 0.21788700 | 0.21565700 | 0.21310500 | 0.21038500 | 0.20761600 | 0.20486500 | 0.20230500 | 0.20010300 | 0.19821500 |
| 0.25567300 | 0.25412700 | 0.25241000 | 0.25059800 | 0.24868200 | 0.24655800 | 0.24411200 | 0.24126800 | 0.23810800 | 0.23489200 | 0.23183800 | 0.22904500 | 0.22662300 | 0.22462300 |
| 0.24388900 | 0.24230400 | 0.24054200 | 0.23868700 | 0.23679200 | 0.23478000 | 0.23247800 | 0.22976000 | 0.22670200 | 0.22358000 | 0.22061900 | 0.21784800 | 0.21527400 | 0.21298800 |
| 0.22009200 | 0.21873900 | 0.21716300 | 0.21543000 | 0.21363800 | 0.21176700 | 0.20966600 | 0.20719300 | 0.20436200 | 0.20138000 | 0.19851900 | 0.19598400 | 0.19384400 | 0.19199800 |
| 0.12345200 | 0.12264900 | 0.12177100 | 0.12088300 | 0.11994700 | 0.11888400 | 0.11768900 | 0.11638800 | 0.11497200 | 0.11343600 | 0.11184700 | 0.11033100 | 0.10900100 | 0.10787700 |
| 0.13881900 | 0.13784900 | 0.13685600 | 0.13590100 | 0.13490200 | 0.13371500 | 0.13227100 | 0.13061200 | 0.12880500 | 0.12694800 | 0.12517400 | 0.12359200 | 0.12223200 | 0.12104500 |
| 0.17483300 | 0.17370400 | 0.17247800 | 0.17121500 | 0.16991700 | 0.16847800 | 0.16678000 | 0.16477500 | 0.16247400 | 0.16003900 | 0.15776800 | 0.15582700 | 0.15415400 | 0.15266300 |

| 6022       | 6024       | 6026        | 6028       | 6030       | 6032       | 6034       | 6036       | 6037       | 6039       | 6041       | 6043       | 6045       | 6047       |
|------------|------------|-------------|------------|------------|------------|------------|------------|------------|------------|------------|------------|------------|------------|
| 0.21531400 | 0.21337500 | 0.211131900 | 0.20921200 | 0.20706200 | 0.20473700 | 0.20213300 | 0.19930300 | 0.19638500 | 0.19342500 | 0.19029200 | 0.18687800 | 0.18328100 | 0.17967100 |
| 0.20608300 | 0.20415300 | 0.20208600  | 0.19984800 | 0.19752800 | 0.19515700 | 0.19261600 | 0.18977900 | 0.18668300 | 0.18346100 | 0.18017400 | 0.17676100 | 0.17318400 | 0.16952300 |
| 0.21901000 | 0.21730300 | 0.21550300  | 0.21352900 | 0.21136400 | 0.20901300 | 0.20648000 | 0.20375100 | 0.20080700 | 0.19767000 | 0.19443600 | 0.19118900 | 0.18790200 | 0.18448800 |
| 0.22227900 | 0.22029500 | 0.21814000  | 0.21582400 | 0.21340800 | 0.21092900 | 0.20834900 | 0.20558500 | 0.20262500 | 0.19951300 | 0.19621000 | 0.19267900 | 0.18903900 | 0.18540400 |
| 0.14322600 | 0.14192400 | 0.14049000  | 0.13894900 | 0.13736000 | 0.13574400 | 0.13404500 | 0.13218500 | 0.13016300 | 0.12804000 | 0.12587000 | 0.12369100 | 0.12148400 | 0.11917400 |
| 0.21770400 | 0.21579000 | 0.21374100  | 0.21153200 | 0.20920900 | 0.20677600 | 0.20419100 | 0.20139800 | 0.19838500 | 0.19521800 | 0.19194400 | 0.18854700 | 0.18504400 | 0.18148800 |
| 0.22169000 | 0.21975400 | 0.21761800  | 0.21528000 | 0.21281400 | 0.21028000 | 0.20766100 | 0.20485400 | 0.20178100 | 0.19846000 | 0.19499200 | 0.19147300 | 0.18789700 | 0.18420000 |
| 0.18167000 | 0.17990500 | 0.17805700  | 0.17615600 | 0.17419400 | 0.17211700 | 0.16992100 | 0.16764900 | 0.16525600 | 0.16264800 | 0.15982800 | 0.15688900 | 0.15388800 | 0.15080300 |
| 0.21212100 | 0.21027700 | 0.20822300  | 0.20588300 | 0.20334600 | 0.20076000 | 0.19815600 | 0.19540500 | 0.19242400 | 0.18927600 | 0.18598900 | 0.18252100 | 0.17892100 | 0.17525300 |
| 0.19646700 | 0.19468100 | 0.19270600  | 0.19050800 | 0.18818400 | 0.18581800 | 0.18338600 | 0.18084900 | 0.17822000 | 0.17548200 | 0.17255300 | 0.16938800 | 0.16604500 | 0.16261600 |
| 0.22284200 | 0.22093800 | 0.21876800  | 0.21642100 | 0.21400400 | 0.21153600 | 0.20897800 | 0.20621600 | 0.20312700 | 0.19977500 | 0.19637400 | 0.19296200 | 0.18940000 | 0.18563800 |
| 0.21097800 | 0.20904100 | 0.20698300  | 0.20476100 | 0.20240700 | 0.19993000 | 0.19730500 | 0.19448400 | 0.19143000 | 0.18819500 | 0.18488400 | 0.18149700 | 0.17794100 | 0.17419400 |
| 0.19023300 | 0.18836300 | 0.18633900  | 0.18421800 | 0.18204900 | 0.17982100 | 0.17748500 | 0.17498300 | 0.17228300 | 0.16940400 | 0.16641700 | 0.16336000 | 0.16019500 | 0.15687700 |
| 0.10688300 | 0.10591800 | 0.10489100  | 0.10375500 | 0.10252600 | 0.10123500 | 0.09988100 | 0.09842100 | 0.09682200 | 0.09512700 | 0.09340500 | 0.09165300 | 0.08985300 | 0.08802200 |
| 0.11994100 | 0.11882400 | 0.11764300  | 0.11636700 | 0.11497700 | 0.11351900 | 0.11205800 | 0.11054400 | 0.10886100 | 0.10700000 | 0.10505400 | 0.10309200 | 0.10108800 | 0.09898600 |
| 0.15129600 | 0.14991700 | 0.14838500  | 0.14667500 | 0.14486300 | 0.14303800 | 0.14120100 | 0.13923400 | 0.13706600 | 0.13477900 | 0.13248900 | 0.13017000 | 0.12781000 | 0.12498600 |

| 6049       | 6051       | 6053       | 6055       | 6057       | 6059       | 6061       | 6063       | 6064       | 6066       | 6068       | 6070       | 6072       | 6074       |
|------------|------------|------------|------------|------------|------------|------------|------------|------------|------------|------------|------------|------------|------------|
| 0.17607300 | 0.17241200 | 0.16871700 | 0.16514000 | 0.16178100 | 0.15862800 | 0.15566000 | 0.15289700 | 0.15036400 | 0.14806500 | 0.14595800 | 0.14401600 | 0.14231800 | 0.14096700 |
| 0.16582600 | 0.16206600 | 0.15832800 | 0.15475300 | 0.15134300 | 0.14804100 | 0.14493200 | 0.14214300 | 0.13965200 | 0.13733900 | 0.13516600 | 0.13320000 | 0.13151500 | 0.13012200 |
| 0.18097300 | 0.17747100 | 0.17404200 | 0.17067900 | 0.16738400 | 0.16419900 | 0.16120200 | 0.15845500 | 0.15597900 | 0.15376900 | 0.15177800 | 0.14996300 | 0.14835300 | 0.14700500 |
| 0.18172400 | 0.17795700 | 0.17418800 | 0.17051100 | 0.16696400 | 0.16359900 | 0.16049500 | 0.15767600 | 0.15512200 | 0.15281200 | 0.15069500 | 0.14873200 | 0.14698400 | 0.14556900 |
| 0.11672300 | 0.11416600 | 0.11162900 | 0.10926200 | 0.10707200 | 0.10497100 | 0.10297400 | 0.10114500 | 0.09946800 | 0.09791700 | 0.09651400 | 0.09526800 | 0.09417900 | 0.09328200 |
| 0.17790400 | 0.17428000 | 0.17059000 | 0.16688600 | 0.16332600 | 0.16003000 | 0.15698000 | 0.15412000 | 0.15148000 | 0.14911700 | 0.14703300 | 0.14518600 | 0.14356800 | 0.14220800 |
| 0.18037200 | 0.17651400 | 0.17276300 | 0.16914400 | 0.16561400 | 0.16223300 | 0.15911900 | 0.15627700 | 0.15363000 | 0.15116500 | 0.14893400 | 0.14697900 | 0.14532400 | 0.14396300 |
| 0.14759800 | 0.14433900 | 0.14118400 | 0.13821600 | 0.13538800 | 0.13267900 | 0.13013500 | 0.12776700 | 0.12555600 | 0.12351200 | 0.12166300 | 0.12002700 | 0.11864500 | 0.11756700 |
| 0.17146500 | 0.16752600 | 0.16361100 | 0.15994600 | 0.15656200 | 0.15337800 | 0.15038800 | 0.14759700 | 0.14497200 | 0.14252400 | 0.14030000 | 0.13835200 | 0.13672100 | 0.13538900 |
| 0.15914200 | 0.15565600 | 0.15225600 | 0.14899700 | 0.14582100 | 0.14274400 | 0.13993500 | 0.13747500 | 0.13523400 | 0.13309000 | 0.13107000 | 0.12925200 | 0.12769000 | 0.12642700 |
| 0.18177500 | 0.17793400 | 0.17419400 | 0.17055800 | 0.16704000 | 0.16373200 | 0.16069400 | 0.15787900 | 0.15522400 | 0.15275600 | 0.15055800 | 0.14866800 | 0.14704800 | 0.14566100 |
| 0.17034100 | 0.16651900 | 0.16282200 | 0.15926800 | 0.15584000 | 0.15254900 | 0.14944100 | 0.14656300 | 0.14390500 | 0.14144300 | 0.13923100 | 0.13732300 | 0.13570700 | 0.13437100 |
| 0.15344400 | 0.14998400 | 0.14658900 | 0.14332900 | 0.14025200 | 0.13738800 | 0.13470800 | 0.13214200 | 0.12969300 | 0.12744900 | 0.12548700 | 0.12382300 | 0.12241500 | 0.12121500 |
| 0.08615000 | 0.08423600 | 0.08235900 | 0.08058900 | 0.07889100 | 0.07724000 | 0.07571700 | 0.07438400 | 0.07316500 | 0.07196900 | 0.07083200 | 0.06983500 | 0.06900400 | 0.06832900 |
| 0.09681800 | 0.09468700 | 0.09264600 | 0.09067700 | 0.08872300 | 0.08677000 | 0.08494900 | 0.08337800 | 0.08197100 | 0.08058600 | 0.07923200 | 0.07802000 | 0.07703300 | 0.07627300 |
| 0.12223000 | 0.11953600 | 0.11691200 | 0.11436400 | 0.11192900 | 0.10959500 | 0.10735000 | 0.10528100 | 0.10347100 | 0.10185800 | 0.10037000 | 0.09904000 | 0.09791400 | 0.09700300 |

| 6076       | 6078       | 6080       | 6082       | 6084       | 6086       | 6088       | 6090       | 6091       | 6093       | 6095       | 6097       | 6099       | 6101       |
|------------|------------|------------|------------|------------|------------|------------|------------|------------|------------|------------|------------|------------|------------|
| 0.13994800 | 0.13919300 | 0.13870300 | 0.13849600 | 0.13855500 | 0.13886400 | 0.13940900 | 0.14013300 | 0.14086300 | 0.14130500 | 0.14126600 | 0.14086300 | 0.14033700 | 0.13980000 |
| 0.12899800 | 0.12817000 | 0.12768900 | 0.12753100 | 0.12763500 | 0.12800000 | 0.12861400 | 0.12933400 | 0.12993100 | 0.13020400 | 0.13009100 | 0.12971200 | 0.12922100 | 0.12870000 |
| 0.14595500 | 0.14522500 | 0.14479100 | 0.14459800 | 0.14467700 | 0.14507600 | 0.14569300 | 0.14633300 | 0.14686500 | 0.14719100 | 0.14719600 | 0.14687300 | 0.14634300 | 0.14574700 |
| 0.14449700 | 0.14369700 | 0.14316200 | 0.14294900 | 0.14309400 | 0.14357600 | 0.14429200 | 0.14502100 | 0.14551400 | 0.14564700 | 0.14545400 | 0.14506800 | 0.14460800 | 0.14413000 |
| 0.09260500 | 0.09213800 | 0.09184900 | 0.09171200 | 0.09173400 | 0.09195800 | 0.09237100 | 0.09282800 | 0.09315100 | 0.09328800 | 0.09325900 | 0.09306400 | 0.09275300 | 0.09243400 |
| 0.14112600 | 0.14035200 | 0.13993000 | 0.13983600 | 0.13999100 | 0.14035200 | 0.14088200 | 0.14145000 | 0.14188200 | 0.14210300 | 0.14209200 | 0.14182800 | 0.14136300 | 0.14081700 |
| 0.14284900 | 0.14199100 | 0.14146000 | 0.14127900 | 0.14142100 | 0.14185400 | 0.14249400 | 0.14318300 | 0.14374600 | 0.14406300 | 0.14406200 | 0.14373300 | 0.14318600 | 0.14259900 |
| 0.11678100 | 0.11619900 | 0.11578100 | 0.11557900 | 0.11565600 | 0.11598500 | 0.11647000 | 0.11702200 | 0.11754600 | 0.11789700 | 0.11793400 | 0.11763900 | 0.11714000 | 0.11659400 |
| 0.13430300 | 0.13348300 | 0.13299700 | 0.13283800 | 0.13296400 | 0.13335500 | 0.13393400 | 0.13455700 | 0.13509400 | 0.13542200 | 0.13544400 | 0.13515500 | 0.13465100 | 0.13408800 |
| 0.12546900 | 0.12477800 | 0.12434400 | 0.12416900 | 0.12424500 | 0.12455100 | 0.12503600 | 0.12559900 | 0.12609100 | 0.12636700 | 0.12636400 | 0.12610000 | 0.12563200 | 0.12507900 |
| 0.14451000 | 0.14362400 | 0.14308700 | 0.14295100 | 0.14315800 | 0.14360200 | 0.14419100 | 0.14483200 | 0.14539900 | 0.14570500 | 0.14565100 | 0.14533500 | 0.14487800 | 0.14434100 |
| 0.13332000 | 0.13254300 | 0.13204100 | 0.13184500 | 0.13199600 | 0.13246100 | 0.13309900 | 0.13375000 | 0.13429300 | 0.13461200 | 0.13462100 | 0.13433100 | 0.13383300 | 0.13323400 |
| 0.12021100 | 0.11942700 | 0.11891600 | 0.11871600 | 0.11879700 | 0.11909100 | 0.11956300 | 0.12013300 | 0.12062500 | 0.12089200 | 0.12092000 | 0.12075000 | 0.12038400 | 0.11986600 |
| 0.06777600 | 0.06731700 | 0.06697700 | 0.06681500 | 0.06686300 | 0.06709600 | 0.06743700 | 0.06780500 | 0.06810900 | 0.06824600 | 0.06820600 | 0.06806400 | 0.06783900 | 0.06754100 |
| 0.07566300 | 0.07516100 | 0.07484600 | 0.07481500 | 0.07500800 | 0.07526500 | 0.07552300 | 0.07581900 | 0.07611900 | 0.07630900 | 0.07632500 | 0.07618400 | 0.07595600 | 0.07570700 |
| 0.09630300 | 0.09577100 | 0.09537800 | 0.09516900 | 0.09519800 | 0.09544100 | 0.09581500 | 0.09623500 | 0.09663800 | 0.09694100 | 0.09702000 | 0.09678300 | 0.09628800 | 0.09577100 |

| 6103       | 6105       | 6107       | 6109       | 6111       | 6113       | 6115       | 6117       | 6118       | 6120       | 6122       | 6124       | 6126       | 6128       |
|------------|------------|------------|------------|------------|------------|------------|------------|------------|------------|------------|------------|------------|------------|
| 0.13930300 | 0.13894600 | 0.13884500 | 0.13904800 | 0.13949400 | 0.14012600 | 0.14096800 | 0.14197400 | 0.14291700 | 0.14355000 | 0.14382500 | 0.14392400 | 0.14414300 | 0.14472700 |
| 0.12823500 | 0.12792000 | 0.12781600 | 0.12798400 | 0.12846200 | 0.12919000 | 0.13008100 | 0.13108700 | 0.13204100 | 0.13268100 | 0.13293200 | 0.13301500 | 0.13323400 | 0.13380900 |
| 0.14521400 | 0.14486100 | 0.14476100 | 0.14494200 | 0.14537000 | 0.14598800 | 0.14678300 | 0.14770900 | 0.14859900 | 0.14926300 | 0.14963800 | 0.14986500 | 0.15019300 | 0.15078300 |
| 0.14372100 | 0.14348200 | 0.14344500 | 0.14361800 | 0.14402600 | 0.14468900 | 0.14557700 | 0.14656300 | 0.14743400 | 0.14802300 | 0.14835100 | 0.14861700 | 0.14900800 | 0.14963200 |
| 0.09215700 | 0.09191700 | 0.09177600 | 0.09185100 | 0.09218800 | 0.09272200 | 0.09333800 | 0.09394000 | 0.09442600 | 0.09469100 | 0.09477900 | 0.09488100 | 0.09513800 | 0.09554700 |
| 0.14031900 | 0.13998300 | 0.13990900 | 0.14013800 | 0.14060200 | 0.14121000 | 0.14199200 | 0.14297600 | 0.14396600 | 0.14467900 | 0.14502500 | 0.14518900 | 0.14549800 | 0.14618400 |
| 0.14209900 | 0.14172700 | 0.14151000 | 0.14157200 | 0.14201400 | 0.14278500 | 0.14376400 | 0.14481300 | 0.14573100 | 0.14636700 | 0.14671300 | 0.14689000 | 0.14713100 | 0.14771200 |
| 0.11611400 | 0.11580100 | 0.11572000 | 0.11586200 | 0.11617600 | 0.11666400 | 0.11736600 | 0.11823500 | 0.11908400 | 0.11968600 | 0.11995600 | 0.12003900 | 0.12021400 | 0.12068200 |
| 0.13361900 | 0.13333600 | 0.13328900 | 0.13352100 | 0.13400900 | 0.13466800 | 0.13547500 | 0.13642400 | 0.13734300 | 0.13798500 | 0.13832000 | 0.13856400 | 0.13894400 | 0.13957200 |
| 0.12462000 | 0.12436600 | 0.12432100 | 0.12449500 | 0.12493600 | 0.12562100 | 0.12645000 | 0.12729400 | 0.12803000 | 0.12858100 | 0.12894800 | 0.12921300 | 0.12951900 | 0.13003300 |
| 0.14383900 | 0.14349600 | 0.14337500 | 0.14353500 | 0.14400300 | 0.14471700 | 0.14561900 | 0.14663600 | 0.14757200 | 0.14822500 | 0.14855500 | 0.14870300 | 0.14893400 | 0.14952900 |
| 0.13264500 | 0.13219400 | 0.13201900 | 0.13220800 | 0.13273800 | 0.13350800 | 0.13442500 | 0.13542300 | 0.13637300 | 0.13706700 | 0.13741400 | 0.13755600 | 0.13776400 | 0.13829500 |
| 0.11937700 | 0.11909100 | 0.11903900 | 0.11922000 | 0.11964600 | 0.12026900 | 0.12103000 | 0.12188200 | 0.12268500 | 0.12324900 | 0.12355700 | 0.12377700 | 0.12408100 | 0.12457000 |
| 0.06725000 | 0.06704400 | 0.06697100 | 0.06706300 | 0.06729600 | 0.06763000 | 0.06807700 | 0.06862600 | 0.06916000 | 0.06954400 | 0.06974600 | 0.06981600 | 0.06987000 | 0.07008400 |
| 0.07547800 | 0.07529100 | 0.07516800 | 0.07518600 | 0.07542100 | 0.07585100 | 0.07639200 | 0.07697500 | 0.07751400 | 0.07792000 | 0.07814400 | 0.07821800 | 0.07829500 | 0.07855400 |
| 0.09544800 | 0.09533500 | 0.09536300 | 0.09554600 | 0.09588900 | 0.09634300 | 0.09690200 | 0.09754400 | 0.09813400 | 0.09854900 | 0.09879200 | 0.09896400 | 0.09918900 | 0.09957300 |

| 6130       | 6132       | 6134       | 6136       | 6138       | 6140       | 6142       | 6144       | 6145       | 6147       | 6149       | 6151       | 6153       | 6155       |
|------------|------------|------------|------------|------------|------------|------------|------------|------------|------------|------------|------------|------------|------------|
| 0.14575000 | 0.14716300 | 0.14886500 | 0.15062900 | 0.15212500 | 0.15308300 | 0.15338100 | 0.15305300 | 0.15223600 | 0.15103500 | 0.14951500 | 0.14781300 | 0.14607100 | 0.14427100 |
| 0.13484800 | 0.13633100 | 0.13809400 | 0.13986600 | 0.14133900 | 0.14227700 | 0.14260100 | 0.14232700 | 0.14149200 | 0.14019600 | 0.13862000 | 0.13692600 | 0.13518200 | 0.13336300 |
| 0.15169400 | 0.15295600 | 0.15450200 | 0.15614100 | 0.15761700 | 0.15866100 | 0.15909200 | 0.15885900 | 0.15802400 | 0.15676900 | 0.15531300 | 0.15377500 | 0.15215600 | 0.15038200 |
| 0.15061600 | 0.15204200 | 0.15379000 | 0.15557800 | 0.15710300 | 0.15811300 | 0.15846400 | 0.15816000 | 0.15727700 | 0.15590800 | 0.15425000 | 0.15253300 | 0.15081400 | 0.14896900 |
| 0.09610700 | 0.09689700 | 0.09793000 | 0.09904700 | 0.10003400 | 0.10074500 | 0.10108700 | 0.10098100 | 0.10043800 | 0.09959000 | 0.09857500 | 0.09746700 | 0.09632400 | 0.09516800 |
| 0.14725200 | 0.14860500 | 0.15017300 | 0.15182900 | 0.15330100 | 0.15429900 | 0.15467500 | 0.15442100 | 0.15359200 | 0.15230400 | 0.15072600 | 0.14900000 | 0.14721100 | 0.14539600 |
| 0.14875900 | 0.15019100 | 0.15187400 | 0.15365300 | 0.15521500 | 0.15620600 | 0.15652600 | 0.15627200 | 0.15550500 | 0.15428500 | 0.15274000 | 0.15099300 | 0.14913700 | 0.14720800 |
| 0.12150200 | 0.12267600 | 0.12413800 | 0.12567200 | 0.12696700 | 0.12776400 | 0.12798400 | 0.12773000 | 0.12714300 | 0.12625100 | 0.12504100 | 0.12359600 | 0.12205000 | 0.12045100 |
| 0.14051000 | 0.14181500 | 0.14343200 | 0.14514400 | 0.14664200 | 0.14766900 | 0.14809900 | 0.14792300 | 0.14717800 | 0.14592900 | 0.14430500 | 0.14250000 | 0.14066000 | 0.13880200 |
| 0.13087900 | 0.13206200 | 0.13349400 | 0.13504800 | 0.13649600 | 0.13752400 | 0.13794600 | 0.13779900 | 0.13714600 | 0.13600100 | 0.13448200 | 0.13280800 | 0.13110100 | 0.12932800 |
| 0.15064400 | 0.15218800 | 0.15391900 | 0.15563000 | 0.15712100 | 0.15815200 | 0.15857200 | 0.15835400 | 0.15753300 | 0.15621400 | 0.15457200 | 0.15278600 | 0.15097800 | 0.14914100 |
| 0.13929900 | 0.14076000 | 0.14249000 | 0.14421800 | 0.14569300 | 0.14669400 | 0.14709200 | 0.14688100 | 0.14612800 | 0.14492700 | 0.14337400 | 0.14160100 | 0.13975300 | 0.13784300 |
| 0.12533900 | 0.12647700 | 0.12796200 | 0.12958900 | 0.13103200 | 0.13198500 | 0.13229800 | 0.13200500 | 0.13123200 | 0.13009800 | 0.12871400 | 0.12720600 | 0.12565000 | 0.12401000 |
| 0.07059800 | 0.07138700 | 0.07227400 | 0.07310300 | 0.07380700 | 0.07432200 | 0.07454400 | 0.07441700 | 0.07398400 | 0.07334500 | 0.07256800 | 0.07167300 | 0.07071900 | 0.06977100 |
| 0.07907600 | 0.07984700 | 0.08078600 | 0.08172900 | 0.08249500 | 0.08299300 | 0.08322500 | 0.08317800 | 0.08279000 | 0.08207100 | 0.08115100 | 0.08017400 | 0.07921100 | 0.07824800 |
| 0.10019000 | 0.10107200 | 0.10217700 | 0.10335900 | 0.10438700 | 0.10507900 | 0.10538100 | 0.10529500 | 0.10482000 | 0.10398800 | 0.10289800 | 0.10168500 | 0.10044100 | 0.09914600 |



| 6157       | 6159       | 6161       | 6163       | 6165       | 6167       | 6169       | 6171       | 6172       | 6174       | 6176       | 6178       | 6180       | 6182       |
|------------|------------|------------|------------|------------|------------|------------|------------|------------|------------|------------|------------|------------|------------|
| 0.14223500 | 0.13983900 | 0.13718000 | 0.13448800 | 0.13193900 | 0.12960800 | 0.12754200 | 0.12578000 | 0.12430700 | 0.12304200 | 0.12190000 | 0.12084000 | 0.11983500 | 0.11884500 |
| 0.13133500 | 0.12896300 | 0.12631400 | 0.12362900 | 0.12109900 | 0.11880000 | 0.11676200 | 0.11498800 | 0.11343100 | 0.11205000 | 0.11087200 | 0.10990300 | 0.10902900 | 0.10811800 |
| 0.14834100 | 0.14596900 | 0.14336500 | 0.14075400 | 0.13826700 | 0.13591800 | 0.13383300 | 0.13217300 | 0.13086200 | 0.12968200 | 0.12855200 | 0.12752100 | 0.12658500 | 0.12565100 |
| 0.14686400 | 0.14443400 | 0.14172300 | 0.13893500 | 0.13632800 | 0.13401200 | 0.13196700 | 0.13017600 | 0.12861400 | 0.12724200 | 0.12606100 | 0.12504400 | 0.12410700 | 0.12317100 |
| 0.09391700 | 0.09244000 | 0.09074000 | 0.08898400 | 0.08733000 | 0.08582600 | 0.08444100 | 0.08318600 | 0.08214600 | 0.08136400 | 0.08073800 | 0.08011200 | 0.07944100 | 0.07878700 |
| 0.14344500 | 0.14112500 | 0.13840400 | 0.13560900 | 0.13307900 | 0.13084200 | 0.12877500 | 0.12689400 | 0.12532100 | 0.12409100 | 0.12308700 | 0.12213700 | 0.12117300 | 0.12024000 |
| 0.14509300 | 0.14267300 | 0.13998300 | 0.13719900 | 0.13454000 | 0.13217100 | 0.13011100 | 0.12828400 | 0.12665900 | 0.12528800 | 0.12418500 | 0.12324900 | 0.12235500 | 0.12143900 |
| 0.11869500 | 0.11663500 | 0.11430400 | 0.11195000 | 0.10980500 | 0.10791700 | 0.10625300 | 0.10479900 | 0.10352200 | 0.10237900 | 0.10139500 | 0.10060300 | 0.09992600 | 0.09922500 |
| 0.13676700 | 0.13434300 | 0.13156800 | 0.12874200 | 0.12613100 | 0.12381900 | 0.12180500 | 0.12007900 | 0.11859100 | 0.11726500 | 0.11608500 | 0.11508100 | 0.11418600 | 0.11325200 |
| 0.12741400 | 0.12530600 | 0.12297300 | 0.12051600 | 0.11816700 | 0.11607000 | 0.11421800 | 0.11259100 | 0.11116700 | 0.10993200 | 0.10890700 | 0.10805300 | 0.10723000 | 0.10636400 |
| 0.14710500 | 0.14469200 | 0.14196800 | 0.13920800 | 0.13662900 | 0.13429000 | 0.13218100 | 0.13031100 | 0.12870200 | 0.12732800 | 0.12612300 | 0.12504000 | 0.12405100 | 0.12311100 |
| 0.13573100 | 0.13331100 | 0.13064100 | 0.12791800 | 0.12535100 | 0.12305200 | 0.12102600 | 0.11925600 | 0.11774200 | 0.11645400 | 0.11530300 | 0.11422900 | 0.11323000 | 0.11228800 |
| 0.12217100 | 0.12002800 | 0.11762300 | 0.11515800 | 0.11282800 | 0.11071500 | 0.10885700 | 0.10729500 | 0.10600700 | 0.10488000 | 0.10383400 | 0.10286900 | 0.10197100 | 0.10109900 |
| 0.06876200 | 0.06755500 | 0.06613300 | 0.06465400 | 0.06330900 | 0.06219700 | 0.06128900 | 0.06049500 | 0.05976200 | 0.05910800 | 0.05857300 | 0.05814600 | 0.05774800 | 0.05729500 |
| 0.07717000 | 0.07583600 | 0.07426700 | 0.07266600 | 0.07121700 | 0.06994500 | 0.06882000 | 0.06784000 | 0.06698700 | 0.06621200 | 0.06548400 | 0.06483800 | 0.06430300 | 0.06383000 |
| 0.09769400 | 0.09602300 | 0.09419700 | 0.09235900 | 0.09062700 | 0.08904800 | 0.08762100 | 0.08633200 | 0.08516700 | 0.08411400 | 0.08317100 | 0.08235100 | 0.08164300 | 0.08100500 |

| 6184       | 6186       | 6188       | 6190       | 6192       | 6194       | 6196       | 6198       | 6199       | 6201       | 6203       | 6205       | 6207       | 6209       |
|------------|------------|------------|------------|------------|------------|------------|------------|------------|------------|------------|------------|------------|------------|
| 0.11788000 | 0.11700500 | 0.11623500 | 0.11554800 | 0.11495900 | 0.11445500 | 0.11394100 | 0.11335900 | 0.11273400 | 0.11210400 | 0.11153300 | 0.11108200 | 0.11071200 | 0.11035700 |
| 0.10714100 | 0.10620000 | 0.10542200 | 0.10480500 | 0.10424200 | 0.10364700 | 0.10298100 | 0.10226500 | 0.10158400 | 0.10099300 | 0.10048900 | 0.10007100 | 0.09974100 | 0.09945700 |
| 0.12469100 | 0.12378300 | 0.12300200 | 0.12235000 | 0.12175600 | 0.12114600 | 0.12052900 | 0.11995700 | 0.11944900 | 0.11899200 | 0.11854900 | 0.11809600 | 0.11767900 | 0.11735900 |
| 0.12222100 | 0.12130200 | 0.12046000 | 0.11970800 | 0.11902000 | 0.11836300 | 0.11774000 | 0.11716800 | 0.11665800 | 0.11617100 | 0.11562800 | 0.11503000 | 0.11450900 | 0.11416800 |
| 0.07818700 | 0.07763200 | 0.07713200 | 0.07670000 | 0.07630200 | 0.07589300 | 0.07548400 | 0.07508800 | 0.07467400 | 0.07427000 | 0.07394600 | 0.07368700 | 0.07343700 | 0.07321000 |
| 0.11933100 | 0.11839000 | 0.11748700 | 0.11674200 | 0.11613200 | 0.11556800 | 0.11502000 | 0.11444900 | 0.11384900 | 0.11331500 | 0.11289100 | 0.11248400 | 0.11205900 | 0.11169500 |
| 0.12050400 | 0.11958900 | 0.11874800 | 0.11801700 | 0.11735700 | 0.11668600 | 0.11599800 | 0.11535000 | 0.11476800 | 0.11424300 | 0.11379000 | 0.11341200 | 0.11303800 | 0.11261400 |
| 0.09845200 | 0.09767400 | 0.09695300 | 0.09630500 | 0.09571900 | 0.09515000 | 0.09457600 | 0.09406400 | 0.09363800 | 0.09322000 | 0.09278400 | 0.09238300 | 0.09203000 | 0.09171800 |
| 0.11225400 | 0.11131900 | 0.11051600 | 0.10979000 | 0.10910400 | 0.10848500 | 0.10793300 | 0.10739900 | 0.10682300 | 0.10620200 | 0.10565000 | 0.10526000 | 0.10495500 | 0.10462800 |
| 0.10550500 | 0.10469000 | 0.10392700 | 0.10326300 | 0.10268300 | 0.10210800 | 0.10152900 | 0.10100300 | 0.10053200 | 0.10007600 | 0.09963800 | 0.09922700 | 0.09881300 | 0.09841300 |
| 0.12218700 | 0.12129900 | 0.12051500 | 0.11985200 | 0.11925000 | 0.11865600 | 0.11807400 | 0.11749700 | 0.11690100 | 0.11629300 | 0.11568300 | 0.11509600 | 0.11464800 | 0.11440800 |
| 0.11136700 | 0.11049100 | 0.10972300 | 0.10907800 | 0.10848400 | 0.10785600 | 0.10717300 | 0.10649000 | 0.10591000 | 0.10545000 | 0.10501600 | 0.10456500 | 0.10413800 | 0.10375700 |
| 0.10023200 | 0.09940600 | 0.09870900 | 0.09814800 | 0.09760300 | 0.09699900 | 0.09638400 | 0.09582600 | 0.09534000 | 0.09489400 | 0.09447400 | 0.09410400 | 0.09378000 | 0.09346200 |
| 0.05680000 | 0.05635000 | 0.05597700 | 0.05563000 | 0.05527200 | 0.05491200 | 0.05459200 | 0.05435800 | 0.05418500 | 0.05398500 | 0.05372100 | 0.05341500 | 0.05311500 | 0.05290500 |
| 0.06335900 | 0.06286700 | 0.06236100 | 0.06188200 | 0.06146800 | 0.06112900 | 0.06087400 | 0.06067500 | 0.06046800 | 0.06022200 | 0.05994200 | 0.05962200 | 0.05926800 | 0.05895700 |
| 0.08039400 | 0.07980200 | 0.07928000 | 0.07888000 | 0.07854300 | 0.07816500 | 0.07773100 | 0.07728500 | 0.07685000 | 0.07644200 | 0.07610100 | 0.07583300 | 0.07558200 | 0.07531900 |

| 6211       | 6213       | 6215       | 6217       | 6219       | 6221       | 6223       | 6225       | 6226       | 6228       | 6230       | 6232       | 6234       | 6236       |
|------------|------------|------------|------------|------------|------------|------------|------------|------------|------------|------------|------------|------------|------------|
| 0.11002800 | 0.10973500 | 0.10948600 | 0.10936600 | 0.10944200 | 0.10961100 | 0.10972100 | 0.10974600 | 0.10974700 | 0.10974200 | 0.10969900 | 0.10956400 | 0.10928900 | 0.10889200 |
| 0.09920200 | 0.09901000 | 0.09888900 | 0.09881700 | 0.09880800 | 0.09886800 | 0.09894300 | 0.09898200 | 0.09898900 | 0.09896800 | 0.09888500 | 0.09871400 | 0.09843900 | 0.09807400 |
| 0.11713400 | 0.11696900 | 0.11684100 | 0.11671900 | 0.11657500 | 0.11645400 | 0.11644200 | 0.11653100 | 0.11663600 | 0.11667700 | 0.11659100 | 0.11638300 | 0.11613800 | 0.11591300 |
| 0.11400700 | 0.11395400 | 0.11389800 | 0.11375100 | 0.11356800 | 0.11349100 | 0.11356900 | 0.11371400 | 0.11383800 | 0.11390300 | 0.11387900 | 0.11374600 | 0.11351200 | 0.11320900 |
| 0.07304900 | 0.07297200 | 0.07294800 | 0.07288900 | 0.07277800 | 0.07271300 | 0.07272900 | 0.07275100 | 0.07275300 | 0.07274900 | 0.07274000 | 0.07273800 | 0.07271600 | 0.07260400 |
| 0.11143200 | 0.11124700 | 0.11113300 | 0.11106900 | 0.11099400 | 0.11088700 | 0.11081200 | 0.11083300 | 0.11093300 | 0.11102800 | 0.11104100 | 0.11091700 | 0.11063200 | 0.11025400 |
| 0.11221900 | 0.11198300 | 0.11190400 | 0.11187600 | 0.11187500 | 0.11193800 | 0.11201300 | 0.11203800 | 0.11202500 | 0.11199600 | 0.11194900 | 0.11187500 | 0.11173900 | 0.11150100 |
| 0.09148500 | 0.09135000 | 0.09128200 | 0.09125000 | 0.09125300 | 0.09127400 | 0.09126000 | 0.09121000 | 0.09119700 | 0.09124800 | 0.09129600 | 0.09126200 | 0.09110200 | 0.09082800 |
| 0.10431500 | 0.10411100 | 0.10401600 | 0.10395900 | 0.10391200 | 0.10390300 | 0.10393500 | 0.10397900 | 0.10403000 | 0.10404600 | 0.10393100 | 0.10368200 | 0.10341900 | 0.10321700 |
| 0.09808800 | 0.09786000 | 0.09773200 | 0.09770200 | 0.09770300 | 0.09767500 | 0.09767000 | 0.09774900 | 0.09787700 | 0.09798000 | 0.09799000 | 0.09787700 | 0.09767000 | 0.09740300 |
| 0.11426600 | 0.11408400 | 0.11389100 | 0.11378300 | 0.11376400 | 0.11378000 | 0.11381200 | 0.11387900 | 0.11395800 | 0.11395100 | 0.11380500 | 0.11359000 | 0.11337600 | 0.11314500 |
| 0.10343200 | 0.10319500 | 0.10304800 | 0.10296300 | 0.10291000 | 0.10288200 | 0.10289000 | 0.10295200 | 0.10305700 | 0.10313500 | 0.10311000 | 0.10299500 | 0.10281600 | 0.10253800 |
| 0.09315100 | 0.09293000 | 0.09285800 | 0.09287200 | 0.09286200 | 0.09280600 | 0.09275300 | 0.09273900 | 0.09277400 | 0.09284200 | 0.09287700 | 0.09281600 | 0.09265200 | 0.09241900 |
| 0.05283200 | 0.05282400 | 0.05278200 | 0.05271900 | 0.05268700 | 0.05268000 | 0.05267100 | 0.05267200 | 0.05269400 | 0.05272800 | 0.05277200 | 0.05280400 | 0.05273000 | 0.05250800 |
| 0.05877300 | 0.05868400 | 0.05860900 | 0.05855700 | 0.05855900 | 0.05858000 | 0.05857800 | 0.05855700 | 0.05854500 | 0.05854600 | 0.05853400 | 0.05848900 | 0.05840800 | 0.05829600 |
| 0.07510700 | 0.07498200 | 0.07489700 | 0.07481900 | 0.07476000 | 0.07474300 | 0.07477200 | 0.07482900 | 0.07488500 | 0.07491000 | 0.07486900 | 0.07473300 | 0.07452400 | 0.07428100 |

| 6238       | 6240       | 6242       | 6244       | 6246       | 6248       | 6250       | 6252       | 6253       | 6255       | 6257       | 6259       | 6261       | 6263       |
|------------|------------|------------|------------|------------|------------|------------|------------|------------|------------|------------|------------|------------|------------|
| 0.10846300 | 0.10806400 | 0.10773500 | 0.10751100 | 0.10734800 | 0.10715400 | 0.10691200 | 0.10664000 | 0.10634900 | 0.10609700 | 0.10591000 | 0.10573400 | 0.10555800 | 0.10539200 |
| 0.09770100 | 0.09740200 | 0.09715100 | 0.09687100 | 0.09655500 | 0.09625900 | 0.09601600 | 0.09578500 | 0.09550700 | 0.09520700 | 0.09497500 | 0.09484700 | 0.09475400 | 0.09460900 |
| 0.11566500 | 0.11532400 | 0.11491200 | 0.11452300 | 0.11418900 | 0.11390000 | 0.11366600 | 0.11348100 | 0.11333900 | 0.11322300 | 0.11308100 | 0.11290700 | 0.11272600 | 0.11251000 |
| 0.11285000 | 0.11243400 | 0.11201200 | 0.11166400 | 0.11137700 | 0.11107400 | 0.11076700 | 0.11051400 | 0.11028200 | 0.11001000 | 0.10971600 | 0.10948200 | 0.10935700 | 0.10927100 |
| 0.07237800 | 0.07209500 | 0.07183100 | 0.07160100 | 0.07136000 | 0.07110700 | 0.07091600 | 0.07082600 | 0.07078200 | 0.07068800 | 0.07051000 | 0.07032000 | 0.07019000 | 0.07009100 |
| 0.10990200 | 0.10960300 | 0.10931100 | 0.10901100 | 0.10870000 | 0.10837100 | 0.10806400 | 0.10782900 | 0.10763900 | 0.10744800 | 0.10725000 | 0.10706500 | 0.10692500 | 0.10681800 |
| 0.11116700 | 0.11079600 | 0.11045200 | 0.11014400 | 0.10980200 | 0.10939200 | 0.10902700 | 0.10881300 | 0.10868100 | 0.10850800 | 0.10828800 | 0.10808700 | 0.10793200 | 0.10777200 |
| 0.09050000 | 0.09017700 | 0.08989900 | 0.08968100 | 0.08946700 | 0.08922800 | 0.08902300 | 0.08884200 | 0.08860100 | 0.08832200 | 0.08808600 | 0.08789200 | 0.08771700 | 0.08756500 |
| 0.10301900 | 0.10275300 | 0.10243400 | 0.10210700 | 0.10178600 | 0.10147500 | 0.10117700 | 0.10087400 | 0.10054100 | 0.10021700 | 0.09997000 | 0.09981700 | 0.09972900 | 0.09965600 |
| 0.09709500 | 0.09676200 | 0.09642900 | 0.09610000 | 0.09575200 | 0.09542000 | 0.09518800 | 0.09502700 | 0.09484600 | 0.09465100 | 0.09447700 | 0.09428700 | 0.09406800 | 0.09385500 |
| 0.11286800 | 0.11255100 | 0.11221300 | 0.11187700 | 0.11155200 | 0.11126500 | 0.11106500 | 0.11091200 | 0.11069500 | 0.11040300 | 0.11013000 | 0.10995000 | 0.10986700 | 0.10980200 |
| 0.10215800 | 0.10173800 | 0.10134400 | 0.10102500 | 0.10077500 | 0.10052700 | 0.10024100 | 0.09992400 | 0.09961900 | 0.09939300 | 0.09926000 | 0.09915400 | 0.09902500 | 0.09885600 |
| 0.09213900 | 0.09180100 | 0.09143100 | 0.09109100 | 0.09081000 | 0.09059800 | 0.09043800 | 0.09025100 | 0.09000000 | 0.08974400 | 0.08951000 | 0.08928600 | 0.08910700 | 0.08898800 |
| 0.05223000 | 0.05201200 | 0.05187300 | 0.05177000 | 0.05164800 | 0.05151400 | 0.05142500 | 0.05136200 | 0.05123800 | 0.05106200 | 0.05091700 | 0.05082800 | 0.05074900 | 0.05063900 |
| 0.05816400 | 0.05802200 | 0.05785800 | 0.05765700 | 0.05742300 | 0.05718400 | 0.05697700 | 0.05681500 | 0.05668100 | 0.05657600 | 0.05650300 | 0.05644300 | 0.05637500 | 0.05626100 |
| 0.07403400 | 0.07382100 | 0.07366500 | 0.07353200 | 0.07332500 | 0.07301100 | 0.07272600 | 0.07260400 | 0.07256700 | 0.07247900 | 0.07230700 | 0.07208900 | 0.07189200 | 0.07176100 |

| 6265       | 6267       | 6269       | 6271       | 6273       | 6275       | 6277       | 6279       | 6280       | 6282       | 6284       | 6286       | 6288       | 6290       |
|------------|------------|------------|------------|------------|------------|------------|------------|------------|------------|------------|------------|------------|------------|
| 0.10516400 | 0.10487900 | 0.10466000 | 0.10454000 | 0.10442400 | 0.10425200 | 0.10407100 | 0.10397000 | 0.10395900 | 0.10391100 | 0.10371700 | 0.10342500 | 0.10309200 | 0.10270000 |
| 0.09441000 | 0.09420500 | 0.09400000 | 0.09380600 | 0.09365600 | 0.09353000 | 0.09340300 | 0.09332100 | 0.09328900 | 0.09319800 | 0.09297600 | 0.09270700 | 0.09249700 | 0.09232700 |
| 0.11226500 | 0.11207400 | 0.11196200 | 0.11185200 | 0.11170000 | 0.11152100 | 0.11133200 | 0.11117600 | 0.11108600 | 0.11100800 | 0.11088900 | 0.11073400 | 0.11051500 | 0.11017900 |
| 0.10913400 | 0.10896100 | 0.10881500 | 0.10869900 | 0.10858200 | 0.10843100 | 0.10825800 | 0.10814100 | 0.10810300 | 0.10801900 | 0.10778700 | 0.10744400 | 0.10706100 | 0.10668100 |
| 0.06997800 | 0.06985900 | 0.06971900 | 0.06953600 | 0.06935600 | 0.06924500 | 0.06921900 | 0.06924400 | 0.06927000 | 0.06924100 | 0.06912400 | 0.06895100 | 0.06876600 | 0.06856600 |
| 0.10668200 | 0.10650100 | 0.10630100 | 0.10609500 | 0.10590000 | 0.10573700 | 0.10559400 | 0.10544800 | 0.10531300 | 0.10520600 | 0.10508700 | 0.10488300 | 0.10457200 | 0.10422800 |
| 0.10756100 | 0.10734800 | 0.10721600 | 0.10714900 | 0.10704400 | 0.10684800 | 0.10661600 | 0.10643100 | 0.10629400 | 0.10614600 | 0.10596900 | 0.10576300 | 0.10549900 | 0.10517800 |
| 0.08746200 | 0.08742500 | 0.08738000 | 0.08723300 | 0.08701600 | 0.08682300 | 0.08668300 | 0.08658700 | 0.08654200 | 0.08654000 | 0.08649900 | 0.08630000 | 0.08591200 | 0.08549300 |
| 0.09954600 | 0.09940300 | 0.09924200 | 0.09906100 | 0.09886800 | 0.09867700 | 0.09852100 | 0.09842500 | 0.09834400 | 0.09821200 | 0.09801600 | 0.09779300 | 0.09755100 | 0.09724500 |
| 0.09368300 | 0.09358300 | 0.09355200 | 0.09352000 | 0.09343000 | 0.09328000 | 0.09311200 | 0.09298100 | 0.09287300 | 0.09271900 | 0.09252300 | 0.09234400 | 0.09216500 | 0.09193600 |
| 0.10965700 | 0.10941900 | 0.10913500 | 0.10885900 | 0.10864400 | 0.10851900 | 0.10848500 | 0.10850100 | 0.10845100 | 0.10824700 | 0.10795200 | 0.10766400 | 0.10733900 | 0.10692900 |
| 0.09864400 | 0.09841100 | 0.09819000 | 0.09800700 | 0.09787500 | 0.09779200 | 0.09775400 | 0.09774000 | 0.09766300 | 0.09744300 | 0.09711700 | 0.09679100 | 0.09651000 | 0.09625100 |
| 0.08888100 | 0.08874700 | 0.08858100 | 0.08841100 | 0.08829500 | 0.08821200 | 0.08807800 | 0.08791100 | 0.08779600 | 0.08771300 | 0.08757200 | 0.08736700 | 0.08713400 | 0.08684200 |
| 0.05054100 | 0.05049100 | 0.05044800 | 0.05037500 | 0.05026700 | 0.05012900 | 0.05002200 | 0.05001600 | 0.05008100 | 0.05010600 | 0.05003800 | 0.04990000 | 0.04971800 | 0.04950100 |
| 0.05608900 | 0.05593300 | 0.05585200 | 0.05582600 | 0.05580500 | 0.05574300 | 0.05564400 | 0.05558400 | 0.05558700 | 0.05559100 | 0.05556100 | 0.05549700 | 0.05536200 | 0.05515000 |
| 0.07170000 | 0.07168500 | 0.07163800 | 0.07149400 | 0.07129300 | 0.07112300 | 0.07105000 | 0.07109500 | 0.07116100 | 0.07110100 | 0.07089400 | 0.07063100 | 0.07036900 | 0.07010600 |

| 6292       | 6294       | 6296       | 6298       | 6300       | 6302       | 6304       | 6306       | 6307       | 6309       | 6311       | 6313       | 6315       | 6317       |
|------------|------------|------------|------------|------------|------------|------------|------------|------------|------------|------------|------------|------------|------------|
| 0.10230400 | 0.10200600 | 0.10180000 | 0.10163000 | 0.10151500 | 0.10150600 | 0.10163600 | 0.10190600 | 0.10224300 | 0.10254800 | 0.10278800 | 0.10296200 | 0.10299600 | 0.10282200 |
| 0.09208400 | 0.09170400 | 0.09126400 | 0.09092000 | 0.09077500 | 0.09080600 | 0.09093700 | 0.09115900 | 0.09146700 | 0.09175700 | 0.09194200 | 0.09202600 | 0.09199900 | 0.09186200 |
| 0.10978200 | 0.10944900 | 0.10920000 | 0.10897400 | 0.10880800 | 0.10877900 | 0.10889900 | 0.10917900 | 0.10959100 | 0.10999600 | 0.11025600 | 0.11031400 | 0.11019600 | 0.11001400 |
| 0.10633300 | 0.10603500 | 0.10579100 | 0.10559400 | 0.10543400 | 0.10534800 | 0.10542200 | 0.10569100 | 0.10606900 | 0.10642000 | 0.10669700 | 0.10691800 | 0.10703700 | 0.10696700 |
| 0.06834700 | 0.06812700 | 0.06792200 | 0.06775000 | 0.06765800 | 0.06767400 | 0.06777400 | 0.06792800 | 0.06813100 | 0.06837500 | 0.06860500 | 0.06872800 | 0.06868600 | 0.06853800 |
| 0.10393300 | 0.10367600 | 0.10342600 | 0.10322000 | 0.10310100 | 0.10308700 | 0.10320600 | 0.10345900 | 0.10380200 | 0.10416500 | 0.10446000 | 0.10458300 | 0.10446700 | 0.10419900 |
| 0.10485500 | 0.10453400 | 0.10419000 | 0.10387800 | 0.10370000 | 0.10370500 | 0.10389400 | 0.10423400 | 0.10464100 | 0.10500400 | 0.10525700 | 0.10539900 | 0.10542100 | 0.10528600 |
| 0.08523800 | 0.08512500 | 0.08498900 | 0.08476200 | 0.08453400 | 0.08443900 | 0.08452300 | 0.08474800 | 0.08505900 | 0.08539800 | 0.08570500 | 0.08589500 | 0.08588900 | 0.08570500 |
| 0.09684600 | 0.09642400 | 0.09609600 | 0.09592800 | 0.09588500 | 0.09587400 | 0.09588400 | 0.09603400 | 0.09640300 | 0.09688900 | 0.09729700 | 0.09748900 | 0.09745300 | 0.09726500 |
| 0.09163100 | 0.09125800 | 0.09090800 | 0.09069500 | 0.09061900 | 0.09061400 | 0.09066300 | 0.09079700 | 0.09105500 | 0.09142900 | 0.09181700 | 0.09207000 | 0.09209700 | 0.09190400 |
| 0.10652400 | 0.10621600 | 0.10600100 | 0.10587800 | 0.10583700 | 0.10583800 | 0.10593200 | 0.10620700 | 0.10659700 | 0.10695200 | 0.10721000 | 0.10732900 | 0.10724100 | 0.10699400 |
| 0.09598500 | 0.09571600 | 0.09546600 | 0.09525300 | 0.09510700 | 0.09508000 | 0.09519400 | 0.09539600 | 0.09562500 | 0.09589000 | 0.09620100 | 0.09645600 | 0.09651800 | 0.09635800 |
| 0.08646300 | 0.08608700 | 0.08584100 | 0.08574800 | 0.08574400 | 0.08578000 | 0.08587400 | 0.08605300 | 0.08630300 | 0.08660600 | 0.08692000 | 0.08711300 | 0.08706700 | 0.08683000 |
| 0.04928000 | 0.04910000 | 0.04895700 | 0.04883400 | 0.04876400 | 0.04877100 | 0.04882700 | 0.04893500 | 0.04910400 | 0.04929200 | 0.04947100 | 0.04965300 | 0.04978800 | 0.04977300 |
| 0.05491600 | 0.05468300 | 0.05445200 | 0.05428100 | 0.05421700 | 0.05425600 | 0.05438500 | 0.05456100 | 0.05472600 | 0.05488200 | 0.05503300 | 0.05512400 | 0.05511500 | 0.05501300 |
| 0.06984600 | 0.06962200 | 0.06947900 | 0.06943300 | 0.06943800 | 0.06945300 | 0.06949500 | 0.06958000 | 0.06971000 | 0.06989600 | 0.07011800 | 0.07030900 | 0.07040700 | 0.07036000 |

| 6319       | 6321       | 6323       | 6325       | 6327       | 6329       | 6331       | 6333       | 6334       | 6336       | 6338       | 6340       | 6342       | 6344       |
|------------|------------|------------|------------|------------|------------|------------|------------|------------|------------|------------|------------|------------|------------|
| 0.10252000 | 0.10226600 | 0.10219800 | 0.10234100 | 0.10263800 | 0.10307100 | 0.10366600 | 0.10439500 | 0.10518100 | 0.10594900 | 0.10659300 | 0.10698500 | 0.10705600 | 0.10678700 |
| 0.09169900 | 0.09161400 | 0.09164900 | 0.09180700 | 0.09210100 | 0.09254700 | 0.09313700 | 0.09386100 | 0.09467900 | 0.09548900 | 0.09616000 | 0.09655300 | 0.09654600 | 0.09612600 |
| 0.10986800 | 0.10974400 | 0.10963900 | 0.10966400 | 0.10992500 | 0.11042200 | 0.11110200 | 0.11189100 | 0.11271500 | 0.11352400 | 0.11422000 | 0.11461900 | 0.11462100 | 0.11428300 |
| 0.10673000 | 0.10648100 | 0.10639500 | 0.10654500 | 0.10686500 | 0.10727400 | 0.10783100 | 0.10862100 | 0.10954200 | 0.11037800 | 0.11098800 | 0.11131900 | 0.11134500 | 0.11105100 |
| 0.06839000 | 0.06830400 | 0.06830700 | 0.06842100 | 0.06861900 | 0.06885800 | 0.06917700 | 0.06962200 | 0.07013100 | 0.07060400 | 0.07098800 | 0.07123800 | 0.07126800 | 0.07102700 |
| 0.10397800 | 0.10390800 | 0.10395900 | 0.10412400 | 0.10445400 | 0.10492800 | 0.10547600 | 0.10611800 | 0.10689800 | 0.10772200 | 0.10839600 | 0.10875300 | 0.10874300 | 0.10841400 |
| 0.10507900 | 0.10497600 | 0.10502300 | 0.10516100 | 0.10541200 | 0.10584400 | 0.10646700 | 0.10724900 | 0.10812600 | 0.10896400 | 0.10960600 | 0.10995500 | 0.10997400 | 0.10965000 |
| 0.08546600 | 0.08529800 | 0.08527900 | 0.08541700 | 0.08566600 | 0.08599500 | 0.08642900 | 0.08701100 | 0.08772500 | 0.08847000 | 0.08911100 | 0.08949600 | 0.08951600 | 0.08918800 |
| 0.09701300 | 0.09678500 | 0.09670700 | 0.09687000 | 0.09726300 | 0.09780000 | 0.09840100 | 0.09905700 | 0.09979900 | 0.10058300 | 0.10126000 | 0.10168000 | 0.10172900 | 0.10137600 |
| 0.09160600 | 0.09138000 | 0.09133500 | 0.09146200 | 0.09173900 | 0.09218400 | 0.09281200 | 0.09356600 | 0.09434200 | 0.09504900 | 0.09559600 | 0.09588300 | 0.09586000 | 0.09555900 |
| 0.10675200 | 0.10665100 | 0.10671800 | 0.10688700 | 0.10710500 | 0.10742400 | 0.10794800 | 0.10870800 | 0.10964800 | 0.11063900 | 0.11147200 | 0.11195200 | 0.11201200 | 0.11166400 |
| 0.09607700 | 0.09584000 | 0.09579200 | 0.09597000 | 0.09632000 | 0.09680400 | 0.09742900 | 0.09818000 | 0.09898000 | 0.09975200 | 0.10042100 | 0.10086100 | 0.10093500 | 0.10061500 |
| 0.08655300 | 0.08635600 | 0.08631400 | 0.08646200 | 0.08677800 | 0.08722500 | 0.08781900 | 0.08856400 | 0.08934900 | 0.09003700 | 0.09055600 | 0.09085000 | 0.09084500 | 0.09052000 |
| 0.04960300 | 0.04940500 | 0.04931500 | 0.04936700 | 0.04949400 | 0.04965500 | 0.04992300 | 0.05033500 | 0.05079200 | 0.05118100 | 0.05146300 | 0.05164300 | 0.05170800 | 0.05159100 |
| 0.05486900 | 0.05476000 | 0.05474800 | 0.05484800 | 0.05503100 | 0.05525400 | 0.05553100 | 0.05592400 | 0.05642200 | 0.05692000 | 0.05731600 | 0.05753300 | 0.05753100 | 0.05736200 |
| 0.07017000 | 0.06994800 | 0.06984900 | 0.06993500 | 0.07016300 | 0.07049000 | 0.07089400 | 0.07135000 | 0.07186000 | 0.07244900 | 0.07303200 | 0.07338700 | 0.07337000 | 0.07305700 |

| 6346       | 6348       | 6350       | 6352       | 6354       | 6356       | 6358       | 6360       | 6361       | 6363       | 6365       | 6367       | 6369       | 6371       |
|------------|------------|------------|------------|------------|------------|------------|------------|------------|------------|------------|------------|------------|------------|
| 0.10618100 | 0.10535300 | 0.10448700 | 0.10364600 | 0.10282600 | 0.10207600 | 0.10141800 | 0.10082100 | 0.10027300 | 0.09981900 | 0.09952900 | 0.09937100 | 0.09924600 | 0.09916200 |
| 0.09540700 | 0.09453400 | 0.09360200 | 0.09270000 | 0.09193200 | 0.09132000 | 0.09076100 | 0.09017500 | 0.08961900 | 0.08917400 | 0.08885100 | 0.08863200 | 0.08852500 | 0.08853400 |
| 0.11367200 | 0.11283900 | 0.11189300 | 0.11096500 | 0.11013800 | 0.10943400 | 0.10881400 | 0.10823400 | 0.10772200 | 0.10731900 | 0.10702500 | 0.10682800 | 0.10673300 | 0.10676100 |
| 0.11044200 | 0.10959800 | 0.10865400 | 0.10773100 | 0.10691600 | 0.10624000 | 0.10565900 | 0.10511600 | 0.10461100 | 0.10418500 | 0.10384000 | 0.10353300 | 0.10329300 | 0.10321700 |
| 0.07059900 | 0.07012600 | 0.06965000 | 0.06911700 | 0.06854400 | 0.06805400 | 0.06767900 | 0.06735200 | 0.06706800 | 0.06684400 | 0.06664500 | 0.06648600 | 0.06642700 | 0.06645600 |
| 0.10783100 | 0.10703900 | 0.10611000 | 0.10516000 | 0.10430000 | 0.10355600 | 0.10289100 | 0.10230800 | 0.10186800 | 0.10159100 | 0.10141200 | 0.10126000 | 0.10112900 | 0.10106500 |
| 0.10901800 | 0.10819100 | 0.10726900 | 0.10630200 | 0.10538200 | 0.10462200 | 0.10403500 | 0.10356000 | 0.10314600 | 0.10273200 | 0.10230500 | 0.10196200 | 0.10180100 | 0.10181800 |
| 0.08863500 | 0.08798400 | 0.08728000 | 0.08652400 | 0.08578400 | 0.08515900 | 0.08462800 | 0.08410200 | 0.08360400 | 0.08323400 | 0.08299700 | 0.08282300 | 0.08269200 | 0.08266600 |
| 0.10072100 | 0.09991700 | 0.09903600 | 0.09811700 | 0.09726500 | 0.09654400 | 0.09588400 | 0.09523400 | 0.09465900 | 0.09422100 | 0.09394000 | 0.09382800 | 0.09382700 | 0.09384600 |
| 0.09502100 | 0.09427900 | 0.09343400 | 0.09263800 | 0.09198500 | 0.09145000 | 0.09090800 | 0.09029200 | 0.08971900 | 0.08931300 | 0.08904000 | 0.08886600 | 0.08884800 | 0.08895800 |
| 0.11094200 | 0.10997300 | 0.10893500 | 0.10794800 | 0.10708500 | 0.10635800 | 0.10571000 | 0.10513600 | 0.10469600 | 0.10436200 | 0.10406300 | 0.10382800 | 0.10372100 | 0.10370400 |
| 0.09998500 | 0.09916200 | 0.09822500 | 0.09723900 | 0.09632700 | 0.09561000 | 0.09509200 | 0.09465200 | 0.09416500 | 0.09362000 | 0.09315000 | 0.09287700 | 0.09280700 | 0.09288500 |
| 0.08994300 | 0.08921200 | 0.08839500 | 0.08754900 | 0.08677700 | 0.08616500 | 0.08568700 | 0.08525600 | 0.08484800 | 0.08448400 | 0.08418100 | 0.08397500 | 0.08388500 | 0.08387700 |
| 0.05125200 | 0.05076500 | 0.05025100 | 0.04978200 | 0.04941300 | 0.04916000 | 0.04894400 | 0.04868700 | 0.04841100 | 0.04818000 | 0.04803200 | 0.04797800 | 0.04800700 | 0.04807400 |
| 0.05709200 | 0.05669700 | 0.05614500 | 0.05552400 | 0.05501600 | 0.05471300 | 0.05451100 | 0.05426000 | 0.05393700 | 0.05362900 | 0.05342300 | 0.05331500 | 0.05324300 | 0.05319500 |
| 0.07257900 | 0.07199900 | 0.07138000 | 0.07079200 | 0.07027300 | 0.06984500 | 0.06950300 | 0.06919100 | 0.06885000 | 0.06846800 | 0.06810200 | 0.06785500 | 0.06776600 | 0.06777300 |



| 6373       | 6375       | 6377       | 6379       | 6381       | 6383       | 6385       | 6387       | 6388       | 6390       | 6392       | 6394       | 6396       | 6398       |
|------------|------------|------------|------------|------------|------------|------------|------------|------------|------------|------------|------------|------------|------------|
| 0.09920400 | 0.09934900 | 0.09952100 | 0.09972200 | 0.09998000 | 0.10024800 | 0.10044800 | 0.10057700 | 0.10068800 | 0.10082900 | 0.10105300 | 0.10144300 | 0.10205900 | 0.10286200 |
| 0.08863300 | 0.08878600 | 0.08897500 | 0.08920100 | 0.08945200 | 0.08966300 | 0.08979100 | 0.08987600 | 0.08997900 | 0.09015700 | 0.09047200 | 0.09094700 | 0.09155700 | 0.09230200 |
| 0.10692700 | 0.10717600 | 0.10740300 | 0.10756000 | 0.10768600 | 0.10782100 | 0.10796400 | 0.10811900 | 0.10829400 | 0.10848600 | 0.10874300 | 0.10913300 | 0.10966300 | 0.11032600 |
| 0.10332800 | 0.10353800 | 0.10375400 | 0.10395500 | 0.10417000 | 0.10440000 | 0.10460000 | 0.10474400 | 0.10487700 | 0.10506800 | 0.10534700 | 0.10573500 | 0.10628200 | 0.10702600 |
| 0.06653100 | 0.06664400 | 0.06675700 | 0.06683500 | 0.06691900 | 0.06703300 | 0.06714600 | 0.06725700 | 0.06738900 | 0.06752300 | 0.06768300 | 0.06794500 | 0.06832400 | 0.06877700 |
| 0.10110500 | 0.10122300 | 0.10136900 | 0.10156200 | 0.10182100 | 0.10206700 | 0.10224000 | 0.10237200 | 0.10250900 | 0.10266700 | 0.10290200 | 0.10332000 | 0.10397500 | 0.10479000 |
| 0.10196400 | 0.10219700 | 0.10247500 | 0.10276000 | 0.10301200 | 0.10320000 | 0.10333200 | 0.10344100 | 0.10358200 | 0.10380300 | 0.10409300 | 0.10444200 | 0.10493900 | 0.10570300 |
| 0.08279000 | 0.08300600 | 0.08323400 | 0.08346200 | 0.08367900 | 0.08383100 | 0.08392200 | 0.08402400 | 0.08415000 | 0.08426900 | 0.08443100 | 0.08474500 | 0.08524500 | 0.08588000 |
| 0.09387700 | 0.09395700 | 0.09409200 | 0.09428200 | 0.09453000 | 0.09478300 | 0.09496800 | 0.09508200 | 0.09517400 | 0.09530500 | 0.09554800 | 0.09594700 | 0.09653700 | 0.09734100 |
| 0.08907200 | 0.08914200 | 0.08924900 | 0.08947400 | 0.08976000 | 0.08998100 | 0.09011400 | 0.09022300 | 0.09035900 | 0.09056000 | 0.09084400 | 0.09122100 | 0.09172300 | 0.09237200 |
| 0.10373300 | 0.10385600 | 0.10407900 | 0.10430800 | 0.10447900 | 0.10460800 | 0.10475500 | 0.10497900 | 0.10526100 | 0.10553100 | 0.10581500 | 0.10623000 | 0.10684000 | 0.10761000 |
| 0.09305500 | 0.09323300 | 0.09338700 | 0.09359400 | 0.09387400 | 0.09409700 | 0.09418100 | 0.09420800 | 0.09428000 | 0.09445800 | 0.09479900 | 0.09533400 | 0.09603700 | 0.09683900 |
| 0.08393300 | 0.08407500 | 0.08430900 | 0.08459300 | 0.08484200 | 0.08499400 | 0.08508800 | 0.08518100 | 0.08525100 | 0.08532500 | 0.08553300 | 0.08595000 | 0.08654300 | 0.08727000 |
| 0.04811200 | 0.04810200 | 0.04810400 | 0.04817000 | 0.04828400 | 0.04838800 | 0.04844600 | 0.04846800 | 0.04849900 | 0.04859500 | 0.04878100 | 0.04903500 | 0.04934900 | 0.04974900 |
| 0.05320300 | 0.05328700 | 0.05345700 | 0.05367200 | 0.05382700 | 0.05388000 | 0.05392200 | 0.05405100 | 0.05426200 | 0.05446900 | 0.05463200 | 0.05480700 | 0.05506600 | 0.05544300 |
| 0.06783700 | 0.06796200 | 0.06813000 | 0.06833300 | 0.06858800 | 0.06883700 | 0.06898200 | 0.06902100 | 0.06902000 | 0.06904000 | 0.06917900 | 0.06950400 | 0.07001000 | 0.07066400 |

| 6400       | 6402       | 6404       | 6406       | 6408       | 6410       | 6412       | 6414       | 6415       | 6417       | 6419       | 6421       | 6423       | 6425       |
|------------|------------|------------|------------|------------|------------|------------|------------|------------|------------|------------|------------|------------|------------|
| 0.10375400 | 0.10466400 | 0.10555100 | 0.10640000 | 0.10729300 | 0.10831500 | 0.10944200 | 0.11061200 | 0.11182800 | 0.11310700 | 0.11443300 | 0.11579200 | 0.11725300 | 0.11896900 |
| 0.09317300 | 0.09409300 | 0.09500300 | 0.09593700 | 0.09692800 | 0.09793700 | 0.09894300 | 0.10001500 | 0.10121100 | 0.10249200 | 0.10381300 | 0.10518900 | 0.10664700 | 0.10828200 |
| 0.11114000 | 0.11204800 | 0.11296200 | 0.11390200 | 0.11489800 | 0.11592600 | 0.11699800 | 0.11811100 | 0.11920400 | 0.12030200 | 0.12152400 | 0.12292100 | 0.12445600 | 0.12612800 |
| 0.10793100 | 0.10891900 | 0.10993300 | 0.11094600 | 0.11196500 | 0.11299900 | 0.11402600 | 0.11504900 | 0.11616100 | 0.11745100 | 0.11887600 | 0.12036400 | 0.12194900 | 0.12372200 |
| 0.06929100 | 0.06985200 | 0.07041300 | 0.07097700 | 0.07159100 | 0.07226500 | 0.07297300 | 0.07369900 | 0.07444600 | 0.07522900 | 0.07608100 | 0.07703000 | 0.07807100 | 0.07919800 |
| 0.10563500 | 0.10646000 | 0.10731100 | 0.10824900 | 0.10926400 | 0.11031400 | 0.11139800 | 0.11253600 | 0.11372200 | 0.11494100 | 0.11619900 | 0.11751900 | 0.11894900 | 0.12058000 |
| 0.10670300 | 0.10775000 | 0.10870400 | 0.10957900 | 0.11044900 | 0.11139200 | 0.11248300 | 0.11374000 | 0.11508100 | 0.11639100 | 0.11764900 | 0.11894500 | 0.12037100 | 0.12202500 |
| 0.08660100 | 0.08738400 | 0.08820100 | 0.08903800 | 0.08988700 | 0.09074000 | 0.09163000 | 0.09259900 | 0.09361000 | 0.09462500 | 0.09570600 | 0.09692200 | 0.09823500 | 0.09962200 |
| 0.09830800 | 0.09934000 | 0.10038300 | 0.10141200 | 0.10239000 | 0.10331300 | 0.10424200 | 0.10529500 | 0.10650900 | 0.10777700 | 0.10904200 | 0.11042200 | 0.11203100 | 0.11385400 |
| 0.09315000 | 0.09402300 | 0.09493900 | 0.09583400 | 0.09669700 | 0.09757000 | 0.09849500 | 0.09947900 | 0.10053200 | 0.10165000 | 0.10281500 | 0.10400000 | 0.10524000 | 0.10672200 |
| 0.10849400 | 0.10943800 | 0.11036600 | 0.11128000 | 0.11223900 | 0.11326200 | 0.11437500 | 0.11558200 | 0.11681800 | 0.11807700 | 0.11945400 | 0.12095900 | 0.12251900 | 0.12419000 |
| 0.09765500 | 0.09846500 | 0.09934000 | 0.10034700 | 0.10144300 | 0.10251800 | 0.10354400 | 0.10459400 | 0.10574400 | 0.10700500 | 0.10834000 | 0.10973900 | 0.11124600 | 0.11291600 |
| 0.08810600 | 0.08899400 | 0.08985900 | 0.09067400 | 0.09147200 | 0.09230100 | 0.09321800 | 0.09427400 | 0.09543700 | 0.09661800 | 0.09778800 | 0.09900500 | 0.10037000 | 0.10196400 |
| 0.05023000 | 0.05074000 | 0.05122200 | 0.05166700 | 0.05210900 | 0.05258700 | 0.05312600 | 0.05372500 | 0.05435900 | 0.05501600 | 0.05568500 | 0.05635200 | 0.05704000 | 0.05780300 |
| 0.05593700 | 0.05647500 | 0.05697500 | 0.05745300 | 0.05799500 | 0.05863900 | 0.05934100 | 0.06002700 | 0.06066800 | 0.06127900 | 0.06189800 | 0.06261500 | 0.06351200 | 0.06456400 |
| 0.07137300 | 0.07202600 | 0.07261700 | 0.07320800 | 0.07384900 | 0.07456300 | 0.07531600 | 0.07607000 | 0.07685900 | 0.07772600 | 0.07865200 | 0.07961800 | 0.08066800 | 0.08185500 |

| 6427       | 6429       | 6431       | 6433       | 6435       | 6437       | 6439       | 6441       | 6442       | 6444       | 6446       | 6448       | 6450       | 6452       |
|------------|------------|------------|------------|------------|------------|------------|------------|------------|------------|------------|------------|------------|------------|
| 0.12105500 | 0.12352400 | 0.12636000 | 0.12963200 | 0.13348200 | 0.13804500 | 0.14346200 | 0.14997100 | 0.15799700 | 0.16820300 | 0.18157500 | 0.19954900 | 0.22384800 | 0.25562300 |
| 0.11028000 | 0.11274600 | 0.11564200 | 0.11896800 | 0.12283800 | 0.12741300 | 0.13291500 | 0.13963400 | 0.14789100 | 0.15819300 | 0.17158600 | 0.18981400 | 0.21495000 | 0.24836900 |
| 0.12802400 | 0.13026400 | 0.13297600 | 0.13626700 | 0.14017400 | 0.14469400 | 0.14993300 | 0.15619100 | 0.16394100 | 0.17384800 | 0.18684000 | 0.20421500 | 0.22762500 | 0.25838800 |
| 0.12576800 | 0.12819200 | 0.13107300 | 0.13443400 | 0.13833100 | 0.14292200 | 0.14844600 | 0.15523700 | 0.16367900 | 0.17428500 | 0.18802900 | 0.20654200 | 0.23175100 | 0.26494100 |
| 0.08045800 | 0.08196500 | 0.08380000 | 0.08597400 | 0.08850200 | 0.09146000 | 0.09499100 | 0.09928900 | 0.10460200 | 0.11132900 | 0.12020800 | 0.13234400 | 0.14901900 | 0.17121500 |
| 0.12255400 | 0.12498900 | 0.12787500 | 0.13117000 | 0.13497400 | 0.13950000 | 0.14494600 | 0.15157200 | 0.15977600 | 0.17013900 | 0.18367500 | 0.20194300 | 0.22677500 | 0.25951900 |
| 0.12405800 | 0.12656200 | 0.12951200 | 0.13290100 | 0.13683600 | 0.14148800 | 0.14709000 | 0.15397100 | 0.16252100 | 0.17322700 | 0.18702100 | 0.20558200 | 0.23099800 | 0.26466900 |
| 0.10121500 | 0.10319600 | 0.10559900 | 0.10837100 | 0.11159400 | 0.11546100 | 0.12010200 | 0.12565300 | 0.13245400 | 0.14112000 | 0.15258900 | 0.16820400 | 0.18955100 | 0.21780400 |
| 0.11589900 | 0.11828200 | 0.12109700 | 0.12439000 | 0.12824900 | 0.13282400 | 0.13833700 | 0.14510200 | 0.15351100 | 0.16410200 | 0.17786200 | 0.19642500 | 0.22176900 | 0.25525000 |
| 0.10864600 | 0.11101700 | 0.11374700 | 0.11686800 | 0.12050200 | 0.12477600 | 0.12987000 | 0.13604300 | 0.14362000 | 0.15312800 | 0.16557200 | 0.18247400 | 0.20559700 | 0.23619100 |
| 0.12616200 | 0.12857400 | 0.13146400 | 0.13485300 | 0.13881200 | 0.14346300 | 0.14899700 | 0.15574800 | 0.16417500 | 0.17483300 | 0.18862300 | 0.20707500 | 0.23217100 | 0.26544400 |
| 0.11485300 | 0.11721900 | 0.12010400 | 0.12349900 | 0.12742600 | 0.13198200 | 0.13735100 | 0.14388800 | 0.15207200 | 0.16250600 | 0.17622300 | 0.19484200 | 0.22023500 | 0.25376000 |
| 0.10384200 | 0.10604100 | 0.10858700 | 0.11152300 | 0.11495400 | 0.11905800 | 0.12404900 | 0.13016800 | 0.13770900 | 0.14716700 | 0.15951300 | 0.17628800 | 0.19929600 | 0.22985400 |
| 0.05870900 | 0.05986400 | 0.06133100 | 0.06306300 | 0.06503000 | 0.06732500 | 0.07011500 | 0.07353400 | 0.07771800 | 0.08297800 | 0.08991600 | 0.09937800 | 0.11236000 | 0.12968700 |
| 0.06572500 | 0.06704000 | 0.06859400 | 0.07046100 | 0.07269200 | 0.07534500 | 0.07850900 | 0.08230700 | 0.08694700 | 0.09284600 | 0.10066100 | 0.11128400 | 0.12583200 | 0.14518900 |
| 0.08321100 | 0.08480800 | 0.08674800 | 0.08910600 | 0.09191700 | 0.09521900 | 0.09910900 | 0.10379200 | 0.10959700 | 0.11699900 | 0.12671100 | 0.13986500 | 0.15795800 | 0.18214800 |

| 6454       | 6456       | 6458       | 6460       | 6462       | 6464       | 6466       | 6468       | 6469       | 6471       | 6473       | 6475       | 6477       | 6479       |
|------------|------------|------------|------------|------------|------------|------------|------------|------------|------------|------------|------------|------------|------------|
| 0.29332100 | 0.32971500 | 0.35180600 | 0.34901700 | 0.32358000 | 0.28787600 | 0.25309500 | 0.22419800 | 0.20177100 | 0.18482900 | 0.17216600 | 0.16270400 | 0.15555300 | 0.15001900 |
| 0.28851700 | 0.32772300 | 0.35188700 | 0.34925300 | 0.32215500 | 0.28417200 | 0.24736100 | 0.21690400 | 0.19339300 | 0.17576800 | 0.16266100 | 0.15284300 | 0.14540800 | 0.13973400 |
| 0.29521200 | 0.33110800 | 0.35336200 | 0.35140400 | 0.32697500 | 0.29202700 | 0.25772000 | 0.22917900 | 0.20713700 | 0.19063300 | 0.17839200 | 0.16925500 | 0.16228400 | 0.15680400 |
| 0.30458400 | 0.34319000 | 0.36701700 | 0.36454800 | 0.33786600 | 0.30016000 | 0.26340300 | 0.23292800 | 0.20944700 | 0.19186900 | 0.17876800 | 0.16895200 | 0.16151200 | 0.15574300 |
| 0.19815000 | 0.22488900 | 0.24211100 | 0.24195800 | 0.22545800 | 0.20110000 | 0.17689000 | 0.15643800 | 0.14028200 | 0.12791500 | 0.11859400 | 0.11157400 | 0.10623800 | 0.10209500 |
| 0.29885400 | 0.33745300 | 0.36159800 | 0.35967900 | 0.33361100 | 0.29646500 | 0.26020800 | 0.23014000 | 0.20687500 | 0.18931500 | 0.17613300 | 0.16619600 | 0.15862100 | 0.15275900 |
| 0.30517700 | 0.34513700 | 0.37051400 | 0.36897800 | 0.34214000 | 0.30357800 | 0.26586000 | 0.23454300 | 0.21034600 | 0.19220700 | 0.17872000 | 0.16864500 | 0.16101400 | 0.15509500 |
| 0.25190600 | 0.28562000 | 0.30694500 | 0.30554500 | 0.28291800 | 0.25048000 | 0.21883500 | 0.19273400 | 0.17270800 | 0.15772900 | 0.14656700 | 0.13815700 | 0.13168300 | 0.12663400 |
| 0.29539600 | 0.33463400 | 0.35890700 | 0.35644100 | 0.32941900 | 0.29126000 | 0.25407200 | 0.22325200 | 0.19952200 | 0.18178900 | 0.16862600 | 0.15878400 | 0.15131700 | 0.14559900 |
| 0.27292000 | 0.30886300 | 0.33132100 | 0.32964300 | 0.30557700 | 0.27112900 | 0.23735600 | 0.20921900 | 0.18740500 | 0.17098400 | 0.15870100 | 0.14947400 | 0.14249900 | 0.13715400 |
| 0.30568900 | 0.34547300 | 0.37050500 | 0.36855200 | 0.34167900 | 0.30349200 | 0.26623000 | 0.23532900 | 0.21145900 | 0.19347100 | 0.18002900 | 0.17003000 | 0.16251700 | 0.15670100 |
| 0.29410000 | 0.33373100 | 0.35841200 | 0.35617900 | 0.32919100 | 0.29091900 | 0.25356700 | 0.22264100 | 0.19890900 | 0.18120800 | 0.16800700 | 0.15807000 | 0.15053000 | 0.14471500 |
| 0.26678900 | 0.30326200 | 0.32627500 | 0.32473900 | 0.30044800 | 0.26573900 | 0.23180100 | 0.20360300 | 0.18181400 | 0.16546100 | 0.15327900 | 0.14413100 | 0.13711600 | 0.13166900 |
| 0.15072500 | 0.17140100 | 0.18421500 | 0.18301400 | 0.16877200 | 0.14844800 | 0.12871800 | 0.11266300 | 0.10060300 | 0.09178600 | 0.08530800 | 0.08042100 | 0.07662900 | 0.07363400 |
| 0.16855800 | 0.19152600 | 0.20615200 | 0.20585600 | 0.19143100 | 0.17003800 | 0.14877500 | 0.13105600 | 0.11732400 | 0.10687700 | 0.09893500 | 0.09286700 | 0.08819200 | 0.08455700 |
| 0.21152700 | 0.24070000 | 0.25953700 | 0.25934300 | 0.24111300 | 0.21421300 | 0.18763300 | 0.16548000 | 0.14818700 | 0.13489500 | 0.12469600 | 0.11691500 | 0.11101600 | 0.10651400 |

| 6481       | 6483       | 6485       | 6487       | 6489       | 6491       | 6493       | 6495       | 6496       | 6498       | 6500       | 6502       | 6504       | 6506       |
|------------|------------|------------|------------|------------|------------|------------|------------|------------|------------|------------|------------|------------|------------|
| 0.14560700 | 0.14202200 | 0.13911200 | 0.13678800 | 0.13502900 | 0.13387700 | 0.13331800 | 0.13322300 | 0.13343500 | 0.13387000 | 0.13452900 | 0.13538200 | 0.13628100 | 0.13713800 |
| 0.13533600 | 0.13180800 | 0.12888300 | 0.12645100 | 0.12459700 | 0.12343800 | 0.12290600 | 0.12282100 | 0.12303200 | 0.12342000 | 0.12394500 | 0.12465000 | 0.12552300 | 0.12648200 |
| 0.15242000 | 0.14888100 | 0.14598300 | 0.14364100 | 0.14190300 | 0.14078500 | 0.14018600 | 0.13999900 | 0.14017000 | 0.14061700 | 0.14123000 | 0.14195800 | 0.14277400 | 0.14362700 |
| 0.15115800 | 0.14742600 | 0.14436000 | 0.14192800 | 0.14014900 | 0.13900400 | 0.13843600 | 0.13836000 | 0.13864100 | 0.13913000 | 0.13975900 | 0.14055100 | 0.14149700 | 0.14250300 |
| 0.09878500 | 0.09606900 | 0.09382500 | 0.09205000 | 0.09079100 | 0.09000900 | 0.08959300 | 0.08945700 | 0.08953500 | 0.08974200 | 0.09003900 | 0.09044100 | 0.09093900 | 0.09147500 |
| 0.14813700 | 0.14440600 | 0.14138300 | 0.13901900 | 0.13730000 | 0.13618400 | 0.13555800 | 0.13530700 | 0.13540900 | 0.13583500 | 0.13644700 | 0.13715300 | 0.13799400 | 0.13899200 |
| 0.15036900 | 0.14648900 | 0.14329900 | 0.14079000 | 0.13896600 | 0.13777800 | 0.13715700 | 0.13703400 | 0.13733400 | 0.13789700 | 0.13850500 | 0.13910700 | 0.13986200 | 0.14084000 |
| 0.12269600 | 0.11959000 | 0.11710400 | 0.11512000 | 0.11361800 | 0.11263000 | 0.11210600 | 0.11193300 | 0.11204200 | 0.11235100 | 0.11276600 | 0.11330500 | 0.11404100 | 0.11495600 |
| 0.14118300 | 0.13764300 | 0.13467800 | 0.13223100 | 0.13037400 | 0.12911700 | 0.12839600 | 0.12817000 | 0.12840000 | 0.12897900 | 0.12975100 | 0.13057900 | 0.13141100 | 0.13227900 |
| 0.13296800 | 0.12962400 | 0.12690100 | 0.12466800 | 0.12295500 | 0.12182500 | 0.12120600 | 0.12096500 | 0.12103100 | 0.12137600 | 0.12192600 | 0.12255500 | 0.12322500 | 0.12402400 |
| 0.15203700 | 0.14819500 | 0.14504900 | 0.14258400 | 0.14078700 | 0.13962800 | 0.13905600 | 0.13898400 | 0.13927500 | 0.13975800 | 0.14033800 | 0.14105900 | 0.14194900 | 0.14291200 |
| 0.14009000 | 0.13632900 | 0.13331500 | 0.13098600 | 0.12925100 | 0.12803800 | 0.12738400 | 0.12730100 | 0.12763300 | 0.12817900 | 0.12885100 | 0.12960400 | 0.13037900 | 0.13118600 |
| 0.12744500 | 0.12412100 | 0.12142800 | 0.11923200 | 0.11752200 | 0.11632600 | 0.11564000 | 0.11542700 | 0.11560700 | 0.11602300 | 0.11653200 | 0.11710200 | 0.11777000 | 0.11855000 |
| 0.07126900 | 0.06942500 | 0.06799300 | 0.06686400 | 0.06601400 | 0.06549800 | 0.06530100 | 0.06527800 | 0.06532000 | 0.06546400 | 0.06575600 | 0.06616500 | 0.06664700 | 0.06716200 |
| 0.08168300 | 0.07937500 | 0.07755300 | 0.07614600 | 0.07505400 | 0.07423400 | 0.07370700 | 0.07349600 | 0.07356900 | 0.07381300 | 0.07411500 | 0.07446700 | 0.07489400 | 0.07539000 |
| 0.10298500 | 0.10012400 | 0.09778900 | 0.09596400 | 0.09465800 | 0.09384200 | 0.09342400 | 0.09327100 | 0.09329500 | 0.09349600 | 0.09385200 | 0.09428600 | 0.09474100 | 0.09522200 |

| 6508       | 6510       | 6512       | 6514       | 6516       | 6518       | 6520       | 6522       | 6523       | 6525       | 6527       | 6529       | 6531       | 6533       |
|------------|------------|------------|------------|------------|------------|------------|------------|------------|------------|------------|------------|------------|------------|
| 0.13803000 | 0.13897600 | 0.13982100 | 0.14046300 | 0.14096300 | 0.14142900 | 0.14186200 | 0.14211900 | 0.14212700 | 0.14201200 | 0.14184700 | 0.14159200 | 0.14130000 | 0.14106000 |
| 0.12749200 | 0.12849200 | 0.12935300 | 0.13003700 | 0.13062900 | 0.13114900 | 0.13151000 | 0.13164500 | 0.13159000 | 0.13143100 | 0.13123900 | 0.13104000 | 0.13081700 | 0.13056600 |
| 0.14449400 | 0.14536100 | 0.14621000 | 0.14702500 | 0.14774400 | 0.14826800 | 0.14858800 | 0.14876200 | 0.14878300 | 0.14861200 | 0.14835600 | 0.14818200 | 0.14804800 | 0.14778200 |
| 0.14347600 | 0.14435900 | 0.14511300 | 0.14573900 | 0.14626600 | 0.14670000 | 0.14704200 | 0.14727100 | 0.14733600 | 0.14727600 | 0.14717900 | 0.14702400 | 0.14679100 | 0.14653500 |
| 0.09200700 | 0.09251900 | 0.09299400 | 0.09338300 | 0.09366400 | 0.09390900 | 0.09412800 | 0.09420300 | 0.09413100 | 0.09405600 | 0.09400600 | 0.09387900 | 0.09368300 | 0.09352600 |
| 0.14005200 | 0.14102700 | 0.14181400 | 0.14240000 | 0.14282900 | 0.14315100 | 0.14341000 | 0.14359300 | 0.14366000 | 0.14364200 | 0.14358800 | 0.14347800 | 0.14329900 | 0.14307700 |
| 0.14190400 | 0.14289400 | 0.14375200 | 0.14449100 | 0.14510800 | 0.14554600 | 0.14579900 | 0.14596000 | 0.14607500 | 0.14610200 | 0.14601500 | 0.14585400 | 0.14565800 | 0.14542600 |
| 0.11592100 | 0.11677200 | 0.11742400 | 0.11792000 | 0.11835400 | 0.11874400 | 0.11900000 | 0.11907900 | 0.11906200 | 0.11900600 | 0.11892500 | 0.11887000 | 0.11884700 | 0.11876900 |
| 0.13319500 | 0.13410100 | 0.13494700 | 0.13570600 | 0.13631800 | 0.13673300 | 0.13699500 | 0.13715600 | 0.13721500 | 0.13716300 | 0.13704200 | 0.13692700 | 0.13682200 | 0.13661700 |
| 0.12494600 | 0.12582100 | 0.12653300 | 0.12712800 | 0.12768800 | 0.12819500 | 0.12854800 | 0.12865700 | 0.12854100 | 0.12837800 | 0.12831200 | 0.12827600 | 0.12813400 | 0.12784300 |
| 0.14385100 | 0.14474200 | 0.14558300 | 0.14637600 | 0.14709500 | 0.14766300 | 0.14802700 | 0.14819000 | 0.14819000 | 0.14809500 | 0.14794300 | 0.14775500 | 0.14757400 | 0.14741400 |
| 0.13208900 | 0.13305400 | 0.13395600 | 0.13472500 | 0.13535300 | 0.13581500 | 0.13609800 | 0.13622600 | 0.13622500 | 0.13614300 | 0.13602100 | 0.13586200 | 0.13566400 | 0.13546300 |
| 0.11940500 | 0.12025800 | 0.12102300 | 0.12163400 | 0.12208200 | 0.12242100 | 0.12269400 | 0.12286700 | 0.12289000 | 0.12280100 | 0.12269700 | 0.12259700 | 0.12245500 | 0.12226300 |
| 0.06764100 | 0.06805800 | 0.06845400 | 0.06883600 | 0.06915600 | 0.06939500 | 0.06956500 | 0.06965900 | 0.06966800 | 0.06962700 | 0.06956000 | 0.06946500 | 0.06935900 | 0.06925800 |
| 0.07591700 | 0.07640000 | 0.07679400 | 0.07711500 | 0.07738000 | 0.07758600 | 0.07774000 | 0.07782400 | 0.07782300 | 0.07776400 | 0.07768600 | 0.07759500 | 0.07750200 | 0.07741200 |
| 0.09578000 | 0.09640700 | 0.09698600 | 0.09741700 | 0.09773300 | 0.09799100 | 0.09817400 | 0.09826800 | 0.09829900 | 0.09828400 | 0.09821200 | 0.09806700 | 0.09784600 | 0.09758300 |

| 6535       | 6537       | 6539       | 6541       | 6543       | 6545       | 6547       | 6549       | 6550       | 6552       | 6554       | 6556       | 6558       | 6560       |
|------------|------------|------------|------------|------------|------------|------------|------------|------------|------------|------------|------------|------------|------------|
| 0.14086500 | 0.14068900 | 0.14055300 | 0.14049200 | 0.14050700 | 0.14053300 | 0.14049800 | 0.14039100 | 0.14022000 | 0.14000400 | 0.13978700 | 0.13960900 | 0.13949200 | 0.13944100 |
| 0.13033900 | 0.13017500 | 0.13008400 | 0.13007700 | 0.13012000 | 0.13015500 | 0.13017800 | 0.13017000 | 0.13003700 | 0.12973800 | 0.12936500 | 0.12905000 | 0.12886800 | 0.12881300 |
| 0.14741600 | 0.14715700 | 0.14707700 | 0.14709000 | 0.14713700 | 0.14721300 | 0.14725700 | 0.14717400 | 0.14696700 | 0.14671600 | 0.14646400 | 0.14625800 | 0.14619900 | 0.14629100 |
| 0.14626200 | 0.14597200 | 0.14576500 | 0.14568300 | 0.14563600 | 0.14558200 | 0.14559500 | 0.14569100 | 0.14573900 | 0.14560400 | 0.14531500 | 0.14499800 | 0.14476300 | 0.14465100 |
| 0.09342900 | 0.09333800 | 0.09324300 | 0.09315900 | 0.09309800 | 0.09306900 | 0.09307600 | 0.09308300 | 0.09302600 | 0.09288800 | 0.09272300 | 0.09259900 | 0.09258400 | 0.09268300 |
| 0.14283100 | 0.14256600 | 0.14230800 | 0.14214400 | 0.14211400 | 0.14212800 | 0.14211800 | 0.14208700 | 0.14199500 | 0.14181800 | 0.14164000 | 0.14152300 | 0.14147200 | 0.14149600 |
| 0.14516900 | 0.14493100 | 0.14474500 | 0.14463500 | 0.14462500 | 0.14468700 | 0.14475100 | 0.14474500 | 0.14459500 | 0.14428500 | 0.14392700 | 0.14368200 | 0.14360700 | 0.14363900 |
| 0.11858400 | 0.11834800 | 0.11815800 | 0.11806400 | 0.11803700 | 0.11802400 | 0.11801900 | 0.11800700 | 0.11792000 | 0.11772600 | 0.11749200 | 0.11732600 | 0.11727700 | 0.11728400 |
| 0.13628700 | 0.13600200 | 0.13589300 | 0.13587200 | 0.13579900 | 0.13566600 | 0.13554100 | 0.13547200 | 0.13544400 | 0.13537000 | 0.13517300 | 0.13493100 | 0.13479300 | 0.13476600 |
| 0.12748200 | 0.12718200 | 0.12701000 | 0.12694600 | 0.12696500 | 0.12702200 | 0.12706600 | 0.12709900 | 0.12711400 | 0.12702800 | 0.12682300 | 0.12661200 | 0.12650700 | 0.12650200 |
| 0.14724900 | 0.14706200 | 0.14684300 | 0.14664400 | 0.14654400 | 0.14653700 | 0.14656200 | 0.14653000 | 0.14634500 | 0.14604900 | 0.14580900 | 0.14567300 | 0.14557800 | 0.14554600 |
| 0.13525900 | 0.13502800 | 0.13482900 | 0.13474200 | 0.13472800 | 0.13467400 | 0.13454800 | 0.13437900 | 0.13417200 | 0.13393900 | 0.13375500 | 0.13367800 | 0.13368700 | 0.13374400 |
| 0.12204900 | 0.12184300 | 0.12170700 | 0.12166700 | 0.12163900 | 0.12155800 | 0.12148400 | 0.12146300 | 0.12140500 | 0.12122400 | 0.12098000 | 0.12077800 | 0.12066700 | 0.12065000 |
| 0.06910700 | 0.06888900 | 0.06870400 | 0.06864600 | 0.06868500 | 0.06874100 | 0.06877200 | 0.06877400 | 0.06874100 | 0.06864700 | 0.06847800 | 0.06827900 | 0.06816500 | 0.06819800 |
| 0.07731500 | 0.07723300 | 0.07720800 | 0.07721600 | 0.07719800 | 0.07715600 | 0.07712000 | 0.07709300 | 0.07702800 | 0.07687200 | 0.07669000 | 0.07659300 | 0.07658200 | 0.07659500 |
| 0.09734800 | 0.09719000 | 0.09712600 | 0.09716800 | 0.09727500 | 0.09734600 | 0.09733300 | 0.09728400 | 0.09720600 | 0.09708100 | 0.09694900 | 0.09684000 | 0.09673100 | 0.09663700 |

| 6562       | 6564       | 6566       | 6568       | 6570       | 6572       | 6574       | 6576       | 6577       | 6579       | 6581       | 6583       | 6585       | 6587       |
|------------|------------|------------|------------|------------|------------|------------|------------|------------|------------|------------|------------|------------|------------|
| 0.13942800 | 0.13943500 | 0.13947000 | 0.13951200 | 0.13946900 | 0.13925200 | 0.13887200 | 0.13841700 | 0.13792100 | 0.13735300 | 0.13670200 | 0.13599100 | 0.13524900 | 0.13447400 |
| 0.12884800 | 0.12894800 | 0.12908300 | 0.12918300 | 0.12914900 | 0.12890100 | 0.12845700 | 0.12791200 | 0.12734800 | 0.12680300 | 0.12625800 | 0.12561400 | 0.12481700 | 0.12395300 |
| 0.14638400 | 0.14637100 | 0.14630000 | 0.14626200 | 0.14626900 | 0.14622200 | 0.14598800 | 0.14552800 | 0.14492500 | 0.14431000 | 0.14375000 | 0.14317800 | 0.14248500 | 0.14165200 |
| 0.14463000 | 0.14464600 | 0.14469200 | 0.14477100 | 0.14479200 | 0.14464800 | 0.14435200 | 0.14398200 | 0.14353300 | 0.14296000 | 0.14227200 | 0.14148200 | 0.14060100 | 0.13970500 |
| 0.09279200 | 0.09280800 | 0.09274500 | 0.09266400 | 0.09258600 | 0.09251800 | 0.09243600 | 0.09225600 | 0.09193900 | 0.09155000 | 0.09115500 | 0.09072900 | 0.09022800 | 0.08967600 |
| 0.14153200 | 0.14148600 | 0.14143300 | 0.14148700 | 0.14153600 | 0.14137400 | 0.14100500 | 0.14053900 | 0.14000400 | 0.13943300 | 0.13887300 | 0.13825000 | 0.13748800 | 0.13663800 |
| 0.14368500 | 0.14371300 | 0.14372800 | 0.14372800 | 0.14368500 | 0.14354100 | 0.14324400 | 0.14280400 | 0.14228700 | 0.14173700 | 0.14113900 | 0.14044800 | 0.13964500 | 0.13878200 |
| 0.11726300 | 0.11722100 | 0.11721100 | 0.11721400 | 0.11713500 | 0.11692500 | 0.11664700 | 0.11634900 | 0.11597700 | 0.11552900 | 0.11508700 | 0.11460100 | 0.11392100 | 0.11307900 |
| 0.13475600 | 0.13474100 | 0.13476000 | 0.13479500 | 0.13474600 | 0.13452200 | 0.13413300 | 0.13366400 | 0.13316500 | 0.13264600 | 0.13209900 | 0.13146000 | 0.13068800 | 0.12982900 |
| 0.12649800 | 0.12645300 | 0.12642700 | 0.12646100 | 0.12648500 | 0.12636300 | 0.12603700 | 0.12556800 | 0.12504300 | 0.12454100 | 0.12407400 | 0.12353300 | 0.12284000 | 0.12206100 |
| 0.14560900 | 0.14569000 | 0.14572200 | 0.14571000 | 0.14564200 | 0.14547300 | 0.14515800 | 0.14469000 | 0.14412500 | 0.14355200 | 0.14298900 | 0.14234200 | 0.14154200 | 0.14063300 |
| 0.13380900 | 0.13382500 | 0.13381000 | 0.13380800 | 0.13371500 | 0.13341000 | 0.13296000 | 0.13249700 | 0.13206600 | 0.13163600 | 0.13115300 | 0.13056800 | 0.12985500 | 0.12901500 |
| 0.12071500 | 0.12081600 | 0.12087300 | 0.12083700 | 0.12072400 | 0.12054700 | 0.12030200 | 0.11997400 | 0.11954900 | 0.11905700 | 0.11852800 | 0.11791900 | 0.11718600 | 0.11636700 |
| 0.06832400 | 0.06844300 | 0.06851000 | 0.06854300 | 0.06854700 | 0.06847700 | 0.06830600 | 0.06806300 | 0.06778900 | 0.06750100 | 0.06720600 | 0.06687800 | 0.06646700 | 0.06598200 |
| 0.07658000 | 0.07653000 | 0.07654600 | 0.07670200 | 0.07685200 | 0.07678700 | 0.07652800 | 0.07620600 | 0.07582800 | 0.07540900 | 0.07507900 | 0.07487100 | 0.07463200 | 0.07422200 |
| 0.09659100 | 0.09659500 | 0.09664200 | 0.09671500 | 0.09674800 | 0.09664800 | 0.09638400 | 0.09601600 | 0.09562100 | 0.09525000 | 0.09490900 | 0.09452900 | 0.09403400 | 0.09342100 |



| 6589       | 6591       | 6593       | 6595       | 6597       | 6599       | 6601       | 6603       | 6604       | 6606       | 6608       | 6610       | 6612       | 6614       |
|------------|------------|------------|------------|------------|------------|------------|------------|------------|------------|------------|------------|------------|------------|
| 0.13361300 | 0.13263700 | 0.13155700 | 0.13037400 | 0.12911200 | 0.12782200 | 0.12654400 | 0.12529700 | 0.12403600 | 0.12269200 | 0.12133000 | 0.12006500 | 0.11885700 | 0.11760300 |
| 0.12311100 | 0.12226000 | 0.12131600 | 0.12022900 | 0.11898200 | 0.11760400 | 0.11618500 | 0.11481000 | 0.11349400 | 0.11223100 | 0.11101400 | 0.10980000 | 0.10856900 | 0.10734500 |
| 0.14074200 | 0.13980600 | 0.13881100 | 0.13768700 | 0.13642300 | 0.13509100 | 0.13378600 | 0.13258100 | 0.13147700 | 0.13039000 | 0.12922500 | 0.12796600 | 0.12663300 | 0.12527100 |
| 0.13881200 | 0.13783000 | 0.13671400 | 0.13549400 | 0.13419900 | 0.13290900 | 0.13171000 | 0.13056700 | 0.12939100 | 0.12815600 | 0.12691300 | 0.12570000 | 0.12444900 | 0.12305600 |
| 0.08909700 | 0.08842100 | 0.08759100 | 0.08668500 | 0.08583600 | 0.08509100 | 0.08439700 | 0.08368600 | 0.08294300 | 0.08216000 | 0.08133100 | 0.08051500 | 0.07975800 | 0.07900700 |
| 0.13575400 | 0.13480600 | 0.13375100 | 0.13258800 | 0.13134100 | 0.13002400 | 0.12869700 | 0.12744400 | 0.12622800 | 0.12496200 | 0.12367100 | 0.12241600 | 0.12120800 | 0.12002600 |
| 0.13787100 | 0.13684900 | 0.13570600 | 0.13453000 | 0.13336000 | 0.13214600 | 0.13088000 | 0.12961100 | 0.12833300 | 0.12700400 | 0.12567300 | 0.12441100 | 0.12319800 | 0.12198200 |
| 0.11224000 | 0.11145100 | 0.11065900 | 0.10981700 | 0.10885200 | 0.10773000 | 0.10654800 | 0.10543400 | 0.10437800 | 0.10330500 | 0.10222500 | 0.10120700 | 0.10023200 | 0.09921000 |
| 0.12893800 | 0.12798900 | 0.12690300 | 0.12565700 | 0.12430600 | 0.12292300 | 0.12159800 | 0.12039600 | 0.11925000 | 0.11804300 | 0.11678800 | 0.11557200 | 0.11437100 | 0.11309500 |
| 0.12126200 | 0.12040000 | 0.11941500 | 0.11835300 | 0.11728200 | 0.11615700 | 0.11492900 | 0.11371200 | 0.11265500 | 0.11171900 | 0.11070000 | 0.10947000 | 0.10814100 | 0.10692000 |
| 0.13965800 | 0.13859200 | 0.13742500 | 0.13621800 | 0.13503600 | 0.13385900 | 0.13264500 | 0.13140800 | 0.13015800 | 0.12888100 | 0.12759400 | 0.12635600 | 0.12515900 | 0.12389100 |
| 0.12805000 | 0.12694000 | 0.12571100 | 0.12444800 | 0.12320700 | 0.12197500 | 0.12071100 | 0.11941600 | 0.11814000 | 0.11690600 | 0.11570700 | 0.11451500 | 0.11326300 | 0.11192800 |
| 0.11552400 | 0.11467400 | 0.11380900 | 0.11288700 | 0.11183900 | 0.11065900 | 0.10943900 | 0.10828700 | 0.10718700 | 0.10605700 | 0.10494300 | 0.10390500 | 0.10284300 | 0.10166500 |
| 0.06549300 | 0.06505400 | 0.06464100 | 0.06416300 | 0.06356100 | 0.06286400 | 0.06217400 | 0.06157300 | 0.06102000 | 0.06041600 | 0.05975700 | 0.05910100 | 0.05846800 | 0.05784600 |
| 0.07365800 | 0.07302100 | 0.07237000 | 0.07172100 | 0.07102300 | 0.07025300 | 0.06953500 | 0.06894900 | 0.06837300 | 0.06767700 | 0.06689700 | 0.06613300 | 0.06540800 | 0.06468400 |
| 0.09273400 | 0.09199600 | 0.09124200 | 0.09054000 | 0.08984900 | 0.08901600 | 0.08802300 | 0.08701100 | 0.08605300 | 0.08512100 | 0.08425400 | 0.08352700 | 0.08285400 | 0.08205000 |

| 6616       | 6618       | 6620       | 6622       | 6624       | 6626       | 6628       | 6630       | 6631       | 6633       | 6635       | 6637       | 6639       | 6641       |
|------------|------------|------------|------------|------------|------------|------------|------------|------------|------------|------------|------------|------------|------------|
| 0.11626600 | 0.11487900 | 0.11354900 | 0.11238000 | 0.11131800 | 0.11024300 | 0.10916500 | 0.10814800 | 0.10715100 | 0.10612800 | 0.10512600 | 0.10419300 | 0.10328000 | 0.10234100 |
| 0.10611800 | 0.10481800 | 0.10343200 | 0.10207600 | 0.10088200 | 0.09984100 | 0.09883100 | 0.09778400 | 0.09675200 | 0.09580900 | 0.09495700 | 0.09413800 | 0.09329500 | 0.09240700 |
| 0.12398300 | 0.12282900 | 0.12172400 | 0.12060200 | 0.11947300 | 0.11833700 | 0.11720700 | 0.11612900 | 0.11512200 | 0.11416800 | 0.11325500 | 0.11239600 | 0.11157300 | 0.11074200 |
| 0.12155000 | 0.12005600 | 0.11867800 | 0.11745400 | 0.11635200 | 0.11531600 | 0.11429300 | 0.11320800 | 0.11206600 | 0.11101600 | 0.11011400 | 0.10921100 | 0.10823600 | 0.10730300 |
| 0.07820800 | 0.07738600 | 0.07660600 | 0.07585600 | 0.07508000 | 0.07432600 | 0.07365800 | 0.07302500 | 0.07240600 | 0.07184800 | 0.07131000 | 0.07072600 | 0.07011400 | 0.06950300 |
| 0.11881400 | 0.11752200 | 0.11619800 | 0.11493700 | 0.11377000 | 0.11267300 | 0.11163200 | 0.11065500 | 0.10973300 | 0.10880800 | 0.10786500 | 0.10692500 | 0.10596000 | 0.10498100 |
| 0.12072200 | 0.11936700 | 0.11794700 | 0.11661300 | 0.11547500 | 0.11448700 | 0.11347600 | 0.11232800 | 0.11114300 | 0.11008900 | 0.10916000 | 0.10825400 | 0.10736200 | 0.10650600 |
| 0.09812100 | 0.09702800 | 0.09596500 | 0.09490600 | 0.09386300 | 0.09289400 | 0.09202200 | 0.09121600 | 0.09040800 | 0.08954900 | 0.08868100 | 0.08785600 | 0.08705100 | 0.08626800 |
| 0.11174000 | 0.11036400 | 0.10901400 | 0.10771600 | 0.10650400 | 0.10539500 | 0.10435800 | 0.10334000 | 0.10234400 | 0.10140600 | 0.10049100 | 0.09955300 | 0.09861900 | 0.09768800 |
| 0.10583300 | 0.10473500 | 0.10353700 | 0.10229100 | 0.10111400 | 0.10006800 | 0.09910700 | 0.09816800 | 0.09728300 | 0.09649200 | 0.09575000 | 0.09497700 | 0.09414100 | 0.09326300 |
| 0.12250100 | 0.12107900 | 0.11971700 | 0.11840100 | 0.11709700 | 0.11583600 | 0.11467700 | 0.11363100 | 0.11266100 | 0.11172300 | 0.11079900 | 0.10989400 | 0.10899200 | 0.10805800 |
| 0.11058000 | 0.10927300 | 0.10801900 | 0.10683200 | 0.10567600 | 0.10451100 | 0.10339400 | 0.10235900 | 0.10134400 | 0.10033900 | 0.09940100 | 0.09854000 | 0.09771900 | 0.09688400 |
| 0.10043800 | 0.09924800 | 0.09808700 | 0.09693700 | 0.09585700 | 0.09491600 | 0.09403900 | 0.09307500 | 0.09203600 | 0.09108200 | 0.09031900 | 0.08968200 | 0.08899800 | 0.08818900 |
| 0.05722100 | 0.05659000 | 0.05596900 | 0.05539200 | 0.05487900 | 0.05439400 | 0.05388400 | 0.05335200 | 0.05286400 | 0.05243700 | 0.05202400 | 0.05160700 | 0.05119300 | 0.05075300 |
| 0.06391800 | 0.06312300 | 0.06239100 | 0.06179200 | 0.06128700 | 0.06080400 | 0.06029200 | 0.05971000 | 0.05907500 | 0.05847000 | 0.05793100 | 0.05741700 | 0.05689400 | 0.05637600 |
| 0.08109700 | 0.08014200 | 0.07926700 | 0.07842900 | 0.07761300 | 0.07684500 | 0.07609600 | 0.07534100 | 0.07464900 | 0.07403400 | 0.07339900 | 0.07270100 | 0.07201800 | 0.07140600 |

| 6643       | 6645       | 6647       | 6649       | 6651       | 6653       | 6655       | 6657       | 6658       | 6660       | 6662       | 6664       | 6666       | 6668       |
|------------|------------|------------|------------|------------|------------|------------|------------|------------|------------|------------|------------|------------|------------|
| 0.10142500 | 0.10054700 | 0.09962000 | 0.09862400 | 0.09765100 | 0.09676500 | 0.09596700 | 0.09523000 | 0.09452800 | 0.09386700 | 0.09326400 | 0.09270700 | 0.09219600 | 0.09172100 |
| 0.09147200 | 0.09050400 | 0.08954900 | 0.08866500 | 0.08782900 | 0.08697700 | 0.08612200 | 0.08532500 | 0.08458300 | 0.08388700 | 0.08329800 | 0.08282800 | 0.08239900 | 0.08193000 |
| 0.10989100 | 0.10904200 | 0.10819800 | 0.10734000 | 0.10644300 | 0.10550100 | 0.10453400 | 0.10362700 | 0.10287700 | 0.10227000 | 0.10172100 | 0.10121500 | 0.10075200 | 0.10028500 |
| 0.10649400 | 0.10574200 | 0.10492700 | 0.10399600 | 0.10299100 | 0.10197400 | 0.10097900 | 0.10005700 | 0.09926500 | 0.09861900 | 0.09808700 | 0.09761000 | 0.09713000 | 0.09661900 |
| 0.06890200 | 0.06834100 | 0.06782600 | 0.06731800 | 0.06676200 | 0.06613600 | 0.06548700 | 0.06491100 | 0.06444000 | 0.06403600 | 0.06369900 | 0.06343000 | 0.06320100 | 0.06299100 |
| 0.10407400 | 0.10323700 | 0.10237000 | 0.10145100 | 0.10051900 | 0.09961200 | 0.09878400 | 0.09804300 | 0.09733300 | 0.09665800 | 0.09609100 | 0.09562600 | 0.09516700 | 0.09465200 |
| 0.10564100 | 0.10473800 | 0.10381300 | 0.10286200 | 0.10190300 | 0.10098200 | 0.10011900 | 0.09930300 | 0.09852100 | 0.09780900 | 0.09722500 | 0.09675300 | 0.09632600 | 0.09592100 |
| 0.08554600 | 0.08487000 | 0.08419800 | 0.08348100 | 0.08269700 | 0.08190800 | 0.08117400 | 0.08049200 | 0.07989600 | 0.07941500 | 0.07898300 | 0.07853100 | 0.07806400 | 0.07760400 |
| 0.09674100 | 0.09580600 | 0.09487000 | 0.09390700 | 0.09294600 | 0.09202900 | 0.09119700 | 0.09045300 | 0.08973200 | 0.08901600 | 0.08840800 | 0.08795200 | 0.08755200 | 0.08707900 |
| 0.09240700 | 0.09163000 | 0.09092400 | 0.09019800 | 0.08936700 | 0.08845800 | 0.08758100 | 0.08681500 | 0.08614900 | 0.08554700 | 0.08502600 | 0.08461600 | 0.08427600 | 0.08391100 |
| 0.10712600 | 0.10627600 | 0.10549000 | 0.10467600 | 0.10381300 | 0.10290700 | 0.10192600 | 0.10091600 | 0.10001100 | 0.09929500 | 0.09873200 | 0.09824400 | 0.09780000 | 0.09736800 |
| 0.09600000 | 0.09508200 | 0.09419100 | 0.09335900 | 0.09254000 | 0.09165600 | 0.09072100 | 0.08986800 | 0.08916800 | 0.08853900 | 0.08790100 | 0.08728600 | 0.08674500 | 0.08624500 |
| 0.08736200 | 0.08661000 | 0.08590300 | 0.08517200 | 0.08434200 | 0.08339500 | 0.08246700 | 0.08171500 | 0.08110700 | 0.08054300 | 0.08003700 | 0.07962600 | 0.07926300 | 0.07887600 |
| 0.05027800 | 0.04981200 | 0.04940400 | 0.04905300 | 0.04868800 | 0.04824200 | 0.04774900 | 0.04731700 | 0.04700100 | 0.04676500 | 0.04651200 | 0.04615600 | 0.04574200 | 0.04540800 |
| 0.05589600 | 0.05546700 | 0.05505300 | 0.05459600 | 0.05407900 | 0.05353800 | 0.05303000 | 0.05259200 | 0.05220500 | 0.05183600 | 0.05151100 | 0.05123700 | 0.05095800 | 0.05066300 |
| 0.07083300 | 0.07024200 | 0.06960200 | 0.06894200 | 0.06833400 | 0.06777600 | 0.06719100 | 0.06656000 | 0.06593700 | 0.06537600 | 0.06493400 | 0.06463300 | 0.06442200 | 0.06420400 |

| 6670       | 6672       | 6674       | 6676       | 6678       | 6680       | 6682       | 6684       | 6685       | 6687       | 6689       | 6691       | 6693       | 6695       |
|------------|------------|------------|------------|------------|------------|------------|------------|------------|------------|------------|------------|------------|------------|
| 0.09121800 | 0.09068900 | 0.09022600 | 0.08984800 | 0.08948600 | 0.08908700 | 0.08860700 | 0.08801500 | 0.08732300 | 0.08655800 | 0.08572700 | 0.08483000 | 0.08394000 | 0.08318400 |
| 0.08138300 | 0.08075500 | 0.08015100 | 0.07971600 | 0.07942500 | 0.07910200 | 0.07865200 | 0.07812700 | 0.07756600 | 0.07690400 | 0.07611300 | 0.07525000 | 0.07439800 | 0.07365400 |
| 0.09978200 | 0.09928600 | 0.09884500 | 0.09844600 | 0.09806000 | 0.09767600 | 0.09725400 | 0.09672400 | 0.09603600 | 0.09519700 | 0.09430600 | 0.09347800 | 0.09272200 | 0.09201700 |
| 0.09606500 | 0.09547900 | 0.09491700 | 0.09442900 | 0.09400300 | 0.09359400 | 0.09317600 | 0.09273000 | 0.09217900 | 0.09144200 | 0.09056000 | 0.08967000 | 0.08887000 | 0.08820400 |
| 0.06274900 | 0.06240800 | 0.06200400 | 0.06163700 | 0.06133400 | 0.06104300 | 0.06072600 | 0.06040300 | 0.06007600 | 0.05969300 | 0.05922400 | 0.05870500 | 0.05821700 | 0.05783300 |
| 0.09411000 | 0.09359900 | 0.09314900 | 0.09274600 | 0.09236700 | 0.09195800 | 0.09143600 | 0.09078400 | 0.09008300 | 0.08937500 | 0.08861200 | 0.08778000 | 0.08697500 | 0.08629400 |
| 0.09550800 | 0.09502000 | 0.09446200 | 0.09393800 | 0.09352400 | 0.09316700 | 0.09273600 | 0.09216100 | 0.09147800 | 0.09073200 | 0.08992200 | 0.08906400 | 0.08822500 | 0.08744500 |
| 0.07715500 | 0.07675600 | 0.07645200 | 0.07618800 | 0.07585300 | 0.07542400 | 0.07496900 | 0.07452000 | 0.07402600 | 0.07342500 | 0.07273000 | 0.07200900 | 0.07132000 | 0.07070900 |
| 0.08651300 | 0.08594700 | 0.08546400 | 0.08509900 | 0.08484400 | 0.08458700 | 0.08416500 | 0.08354500 | 0.08281900 | 0.08201300 | 0.08111600 | 0.08021700 | 0.07940200 | 0.07867100 |
| 0.08342400 | 0.08281600 | 0.08222600 | 0.08181800 | 0.08158800 | 0.08133300 | 0.08089000 | 0.08029900 | 0.07964600 | 0.07894900 | 0.07823700 | 0.07755000 | 0.07689900 | 0.07628600 |
| 0.09686200 | 0.09627900 | 0.09574100 | 0.09530800 | 0.09493200 | 0.09454300 | 0.09406900 | 0.09346100 | 0.09271800 | 0.09188300 | 0.09105200 | 0.09031000 | 0.08964200 | 0.08897400 |
| 0.08572400 | 0.08518900 | 0.08469400 | 0.08428900 | 0.08397800 | 0.08367900 | 0.08326700 | 0.08271400 | 0.08205100 | 0.08126200 | 0.08036700 | 0.07948800 | 0.07875300 | 0.07818300 |
| 0.07841800 | 0.07788800 | 0.07737600 | 0.07698500 | 0.07670900 | 0.07641800 | 0.07597100 | 0.07535700 | 0.07468500 | 0.07403600 | 0.07337400 | 0.07261500 | 0.07182600 | 0.07120200 |
| 0.04519100 | 0.04501000 | 0.04482700 | 0.04465500 | 0.04449400 | 0.04431800 | 0.04410300 | 0.04385200 | 0.04357900 | 0.04328400 | 0.04295000 | 0.04255800 | 0.04213100 | 0.04172500 |
| 0.05039600 | 0.05014700 | 0.04988100 | 0.04961600 | 0.04939100 | 0.04919200 | 0.04898300 | 0.04875400 | 0.04847700 | 0.04812000 | 0.04770300 | 0.04723700 | 0.04672800 | 0.04627600 |
| 0.06386900 | 0.06341300 | 0.06297400 | 0.06266500 | 0.06245300 | 0.06219000 | 0.06176400 | 0.06126500 | 0.06085600 | 0.06050100 | 0.06006800 | 0.05955100 | 0.05901400 | 0.05851500 |

| 6697       | 6699       | 6701       | 6703       | 6705       | 6707       | 6709       | 6711       | 6712       | 6714       | 6716       | 6718       | 6720       | 6722       |
|------------|------------|------------|------------|------------|------------|------------|------------|------------|------------|------------|------------|------------|------------|
| 0.08256000 | 0.08197900 | 0.08145600 | 0.08101100 | 0.08056700 | 0.08008600 | 0.07961500 | 0.07916100 | 0.07868400 | 0.07819200 | 0.07777100 | 0.07747200 | 0.07719800 | 0.07686000 |
| 0.07307000 | 0.07256700 | 0.07204200 | 0.07149500 | 0.07097900 | 0.07051100 | 0.07007100 | 0.06964500 | 0.06923700 | 0.06885200 | 0.06847700 | 0.06809300 | 0.06770200 | 0.06733000 |
| 0.09139700 | 0.09086700 | 0.09038900 | 0.08995100 | 0.08953300 | 0.08910200 | 0.08866100 | 0.08822400 | 0.08776300 | 0.08728400 | 0.08684900 | 0.08648100 | 0.08616600 | 0.08590100 |
| 0.08764800 | 0.08707100 | 0.08637600 | 0.08567200 | 0.08512200 | 0.08470500 | 0.08428100 | 0.08379500 | 0.08329200 | 0.08279400 | 0.08233600 | 0.08198000 | 0.08170600 | 0.08144200 |
| 0.05753400 | 0.05720400 | 0.05676700 | 0.05629100 | 0.05588700 | 0.05558000 | 0.05536100 | 0.05523000 | 0.05510700 | 0.05487900 | 0.05455500 | 0.05420000 | 0.05384000 | 0.05353200 |
| 0.08571200 | 0.08516800 | 0.08468300 | 0.08426000 | 0.08382000 | 0.08334000 | 0.08285900 | 0.08237000 | 0.08188000 | 0.08145700 | 0.08111200 | 0.08081000 | 0.08052200 | 0.08019300 |
| 0.08670100 | 0.08602100 | 0.08550100 | 0.08511400 | 0.08471000 | 0.08423200 | 0.08374600 | 0.08329000 | 0.08287300 | 0.08249200 | 0.08211700 | 0.08174400 | 0.08138700 | 0.08104300 |
| 0.07021800 | 0.06980100 | 0.06933900 | 0.06880300 | 0.06828900 | 0.06787000 | 0.06751900 | 0.06717300 | 0.06681300 | 0.06647500 | 0.06621400 | 0.06603900 | 0.06586500 | 0.06559500 |
| 0.07803400 | 0.07748900 | 0.07698000 | 0.07648900 | 0.07602800 | 0.07557400 | 0.07508200 | 0.07453000 | 0.07395900 | 0.07344400 | 0.07301000 | 0.07264300 | 0.07232500 | 0.07203200 |
| 0.07571400 | 0.07517100 | 0.07465400 | 0.07416100 | 0.07367100 | 0.07319400 | 0.07278500 | 0.07242800 | 0.07202900 | 0.07158000 | 0.07118200 | 0.07087400 | 0.07058200 | 0.07029400 |
| 0.08829700 | 0.08766000 | 0.08706700 | 0.08650900 | 0.08603300 | 0.08564800 | 0.08527300 | 0.08483000 | 0.08433700 | 0.08385600 | 0.08341000 | 0.08296900 | 0.08253700 | 0.08218700 |
| 0.07767700 | 0.07711600 | 0.07650800 | 0.07593300 | 0.07542000 | 0.07496300 | 0.07457300 | 0.07420600 | 0.07378400 | 0.07330300 | 0.07284100 | 0.07241800 | 0.07198400 | 0.07156000 |
| 0.07077200 | 0.07036500 | 0.06987900 | 0.06935900 | 0.06885900 | 0.06838400 | 0.06791500 | 0.06747400 | 0.06709100 | 0.06676500 | 0.06649100 | 0.06623200 | 0.06589900 | 0.06549500 |
| 0.04135900 | 0.04102400 | 0.04072300 | 0.04044400 | 0.04017200 | 0.03993200 | 0.03976200 | 0.03962100 | 0.03943100 | 0.03920500 | 0.03900700 | 0.03884900 | 0.03871000 | 0.03857500 |
| 0.04597900 | 0.04575200 | 0.04545500 | 0.04509000 | 0.04475100 | 0.04447300 | 0.04423100 | 0.04403900 | 0.04392500 | 0.04381300 | 0.04360200 | 0.04331900 | 0.04306500 | 0.04287100 |
| 0.05808900 | 0.05770500 | 0.05732200 | 0.05694700 | 0.05658900 | 0.05625300 | 0.05593600 | 0.05561200 | 0.05529200 | 0.05498300 | 0.05467300 | 0.05441300 | 0.05422400 | 0.05402300 |

| 6724       | 6726       | 6728       | 6730       | 6732       | 6734       | 6736       | 6738       | 6739       | 6741       | 6743       | 6745       | 6747       | 6749       |
|------------|------------|------------|------------|------------|------------|------------|------------|------------|------------|------------|------------|------------|------------|
| 0.07655700 | 0.07638500 | 0.07625700 | 0.07605100 | 0.07575600 | 0.07544200 | 0.07518300 | 0.07497700 | 0.07476800 | 0.07453200 | 0.07427700 | 0.07400300 | 0.07373400 | 0.07347900 |
| 0.06699200 | 0.06671600 | 0.06652000 | 0.06633800 | 0.06610400 | 0.06586700 | 0.06568900 | 0.06554800 | 0.06540000 | 0.06521200 | 0.06493000 | 0.06455600 | 0.06419400 | 0.06393800 |
| 0.08567400 | 0.08546200 | 0.08524700 | 0.08502900 | 0.08483300 | 0.08464700 | 0.08443100 | 0.08419600 | 0.08397600 | 0.08375600 | 0.08346500 | 0.08309000 | 0.08275300 | 0.08251000 |
| 0.08120800 | 0.08104200 | 0.08091500 | 0.08077100 | 0.08056700 | 0.08029300 | 0.07999300 | 0.07971200 | 0.07946500 | 0.07924000 | 0.07897600 | 0.07863000 | 0.07828300 | 0.07799000 |
| 0.05334500 | 0.05325000 | 0.05315700 | 0.05303200 | 0.05291000 | 0.05282900 | 0.05278300 | 0.05273400 | 0.05265300 | 0.05253300 | 0.05237500 | 0.05218100 | 0.05195700 | 0.05173100 |
| 0.07981400 | 0.07947800 | 0.07924000 | 0.07902900 | 0.07877200 | 0.07852700 | 0.07839500 | 0.07830600 | 0.07809400 | 0.07778400 | 0.07748900 | 0.07722100 | 0.07698600 | 0.07677000 |
| 0.08073900 | 0.08052000 | 0.08035000 | 0.08013600 | 0.07985700 | 0.07960900 | 0.07947900 | 0.07940500 | 0.07923300 | 0.07892400 | 0.07857600 | 0.07825200 | 0.07794000 | 0.07765600 |
| 0.06526800 | 0.06500400 | 0.06480400 | 0.06458100 | 0.06435800 | 0.06421700 | 0.06412900 | 0.06399900 | 0.06380600 | 0.06356900 | 0.06327700 | 0.06296900 | 0.06274000 | 0.06258800 |
| 0.07176400 | 0.07155100 | 0.07137500 | 0.07116900 | 0.07091200 | 0.07067000 | 0.07054900 | 0.07054400 | 0.07047700 | 0.07018300 | 0.06971100 | 0.06924200 | 0.06891300 | 0.06869700 |
| 0.07007800 | 0.06992600 | 0.06979200 | 0.06964400 | 0.06944300 | 0.06920100 | 0.06899600 | 0.06884400 | 0.06868000 | 0.06847900 | 0.06826500 | 0.06803800 | 0.06779100 | 0.06753000 |
| 0.08197100 | 0.08181500 | 0.08161500 | 0.08136600 | 0.08112100 | 0.08090700 | 0.08072300 | 0.08056300 | 0.08041100 | 0.08020700 | 0.07987500 | 0.07945000 | 0.07907000 | 0.07879900 |
| 0.07122300 | 0.07100400 | 0.07088300 | 0.07080800 | 0.07072400 | 0.07060700 | 0.07044500 | 0.07022200 | 0.06994100 | 0.06960800 | 0.06921100 | 0.06878600 | 0.06844800 | 0.06824400 |
| 0.06515000 | 0.06492800 | 0.06473500 | 0.06449800 | 0.06429700 | 0.06420600 | 0.06416600 | 0.06407600 | 0.06390600 | 0.06367200 | 0.06337300 | 0.06304300 | 0.06277500 | 0.06259500 |
| 0.03842800 | 0.03828200 | 0.03818400 | 0.03816200 | 0.03815000 | 0.03805900 | 0.03791400 | 0.03778100 | 0.03765700 | 0.03753900 | 0.03744100 | 0.03734100 | 0.03723100 | 0.03710900 |
| 0.04270800 | 0.04255000 | 0.04240600 | 0.04231300 | 0.04227300 | 0.04225200 | 0.04221100 | 0.04211200 | 0.04195300 | 0.04178700 | 0.04164500 | 0.04150100 | 0.04135400 | 0.04120900 |
| 0.05379800 | 0.05363500 | 0.05351200 | 0.05333400 | 0.05312400 | 0.05300600 | 0.05300000 | 0.05297600 | 0.05285800 | 0.05269200 | 0.05250400 | 0.05226100 | 0.05196800 | 0.05169200 |

| 6751       | 6753       | 6755       | 6757       | 6759       | 6761       | 6763       | 6765       | 6766       | 6768       | 6770       | 6772       | 6774       | 6776       |
|------------|------------|------------|------------|------------|------------|------------|------------|------------|------------|------------|------------|------------|------------|
| 0.07320500 | 0.07290500 | 0.07258700 | 0.07226000 | 0.07198500 | 0.07178300 | 0.07154500 | 0.07121600 | 0.07093600 | 0.07084800 | 0.07089400 | 0.07093200 | 0.07090700 | 0.07083000 |
| 0.06374600 | 0.06350400 | 0.06318600 | 0.06285700 | 0.06257100 | 0.06235400 | 0.06218700 | 0.06201400 | 0.06183700 | 0.06171900 | 0.06166500 | 0.06162300 | 0.06153300 | 0.06141000 |
| 0.08223700 | 0.08188500 | 0.08158000 | 0.08134300 | 0.08108100 | 0.08078000 | 0.08044400 | 0.08007800 | 0.07981400 | 0.07976400 | 0.07982400 | 0.07985600 | 0.07986100 | 0.07986900 |
| 0.07768000 | 0.07735000 | 0.07710200 | 0.07692000 | 0.07669900 | 0.07640900 | 0.07606200 | 0.07572900 | 0.07555500 | 0.07556100 | 0.07559600 | 0.07553900 | 0.07539100 | 0.07525400 |
| 0.05153800 | 0.05137600 | 0.05123400 | 0.05112700 | 0.05104100 | 0.05087600 | 0.05058400 | 0.05029600 | 0.05015600 | 0.05013200 | 0.05012700 | 0.05012900 | 0.05015600 | 0.05020700 |
| 0.07649200 | 0.07617000 | 0.07590200 | 0.07566400 | 0.07538000 | 0.07506100 | 0.07473100 | 0.07442400 | 0.07423700 | 0.07420300 | 0.07419700 | 0.07412600 | 0.07405300 | 0.07404100 |
| 0.07739500 | 0.07711100 | 0.07680500 | 0.07651900 | 0.07626300 | 0.07599100 | 0.07564600 | 0.07528700 | 0.07505400 | 0.07494600 | 0.07488500 | 0.07491500 | 0.07506600 | 0.07520000 |
| 0.06240100 | 0.06213300 | 0.06185100 | 0.06161200 | 0.06143200 | 0.06128700 | 0.06108900 | 0.06083200 | 0.06064200 | 0.06056300 | 0.06052600 | 0.06050100 | 0.06051700 | 0.06055800 |
| 0.06844600 | 0.06809700 | 0.06776900 | 0.06755000 | 0.06738600 | 0.06716800 | 0.06683600 | 0.06647200 | 0.06625200 | 0.06620700 | 0.06619900 | 0.06615900 | 0.06614600 | 0.06619100 |
| 0.06723000 | 0.06691000 | 0.06665300 | 0.06646100 | 0.06624600 | 0.06594400 | 0.06557700 | 0.06525000 | 0.06505900 | 0.06501500 | 0.06507400 | 0.06514100 | 0.06513600 | 0.06510000 |
| 0.07856200 | 0.07827200 | 0.07793400 | 0.07761100 | 0.07737000 | 0.07719300 | 0.07697500 | 0.07672100 | 0.07657200 | 0.07654900 | 0.07652900 | 0.07644900 | 0.07634800 | 0.07626600 |
| 0.06807200 | 0.06786500 | 0.06763500 | 0.06734600 | 0.06697900 | 0.06659600 | 0.06626200 | 0.06605600 | 0.06602700 | 0.06608400 | 0.06608300 | 0.06600200 | 0.06590900 | 0.06584700 |
| 0.06240100 | 0.06213700 | 0.06187700 | 0.06165200 | 0.06140400 | 0.06110400 | 0.06076700 | 0.06045500 | 0.06027200 | 0.06021600 | 0.06020400 | 0.06021300 | 0.06026900 | 0.06034200 |
| 0.03693000 | 0.03672000 | 0.03655800 | 0.03642400 | 0.03627300 | 0.03613800 | 0.03600700 | 0.03585800 | 0.03579400 | 0.03589400 | 0.03603600 | 0.03606600 | 0.03600400 | 0.03597400 |
| 0.04105400 | 0.04090200 | 0.04078000 | 0.04065300 | 0.04045500 | 0.04018300 | 0.03989900 | 0.03970600 | 0.03965300 | 0.03968000 | 0.03971600 | 0.03973700 | 0.03976300 | 0.03982200 |
| 0.05148100 | 0.05131800 | 0.05114400 | 0.05091500 | 0.05064900 | 0.05040200 | 0.05018800 | 0.05001300 | 0.04993700 | 0.04997200 | 0.05002800 | 0.05003200 | 0.05002300 | 0.05005800 |

| 6778       | 6780       | 6782       | 6784       | 6786       | 6788       | 6790       | 6791       | 6793       | 6795       | 6797       | 6799       | 6801       | 6803       |
|------------|------------|------------|------------|------------|------------|------------|------------|------------|------------|------------|------------|------------|------------|
| 0.07070500 | 0.07052300 | 0.07031600 | 0.07017300 | 0.07012700 | 0.07009300 | 0.07001300 | 0.06991900 | 0.06984700 | 0.06979300 | 0.06975800 | 0.06976000 | 0.06980400 | 0.06988200 |
| 0.06132700 | 0.06128800 | 0.06120300 | 0.06105500 | 0.06093600 | 0.06085900 | 0.06074000 | 0.06058400 | 0.06047100 | 0.06040300 | 0.06034400 | 0.06033300 | 0.06039800 | 0.06050400 |
| 0.07982200 | 0.07968200 | 0.07949200 | 0.07932700 | 0.07922100 | 0.07913300 | 0.07904600 | 0.07898300 | 0.07888300 | 0.07871200 | 0.07862600 | 0.07869400 | 0.07873300 | 0.07871300 |
| 0.07521600 | 0.07521500 | 0.07512800 | 0.07496400 | 0.07479800 | 0.07463300 | 0.07447400 | 0.07438300 | 0.07432500 | 0.07423500 | 0.07421700 | 0.07430700 | 0.07431600 | 0.07424200 |
| 0.05025400 | 0.05021600 | 0.05002300 | 0.04977200 | 0.04960100 | 0.04949200 | 0.04939700 | 0.04936600 | 0.04938000 | 0.04936000 | 0.04937300 | 0.04947900 | 0.04952700 | 0.04947800 |
| 0.07402100 | 0.07391500 | 0.07372400 | 0.07350500 | 0.07332700 | 0.07321000 | 0.07314500 | 0.07314400 | 0.07312600 | 0.07298000 | 0.07280300 | 0.07275800 | 0.07279300 | 0.07284800 |
| 0.07518700 | 0.07502400 | 0.07476500 | 0.07452700 | 0.07439800 | 0.07426800 | 0.07405500 | 0.07388800 | 0.07380900 | 0.07371400 | 0.07365900 | 0.07372700 | 0.07380400 | 0.07387400 |
| 0.06053600 | 0.06038000 | 0.06011000 | 0.05983300 | 0.05967500 | 0.05963800 | 0.05960200 | 0.05954700 | 0.05952100 | 0.05949300 | 0.05945700 | 0.05944600 | 0.05941600 | 0.05937400 |
| 0.06622400 | 0.06616000 | 0.06599300 | 0.06578100 | 0.06558000 | 0.06538900 | 0.06520800 | 0.06508200 | 0.06500500 | 0.06489100 | 0.06475600 | 0.06471700 | 0.06477800 | 0.06494100 |
| 0.06507500 | 0.06498300 | 0.06480600 | 0.06467600 | 0.06465000 | 0.06459700 | 0.06444800 | 0.06430800 | 0.06421400 | 0.06408300 | 0.06398500 | 0.06402600 | 0.06409100 | 0.06410900 |
| 0.07619000 | 0.07609000 | 0.07595800 | 0.07580400 | 0.07564700 | 0.07549600 | 0.07534600 | 0.07520800 | 0.07507500 | 0.07493800 | 0.07489500 | 0.07501200 | 0.07518400 | 0.07534400 |
| 0.06580600 | 0.06574000 | 0.06559200 | 0.06538200 | 0.06519800 | 0.06506500 | 0.06493800 | 0.06481500 | 0.06469000 | 0.06456800 | 0.06455600 | 0.06465500 | 0.06466300 | 0.06456900 |
| 0.06034400 | 0.06021400 | 0.06000800 | 0.05984800 | 0.05974700 | 0.05962200 | 0.05946700 | 0.05934600 | 0.05924400 | 0.05914200 | 0.05915500 | 0.05932700 | 0.05945700 | 0.05942500 |
| 0.03600600 | 0.03601200 | 0.03591700 | 0.03575600 | 0.03562400 | 0.03552300 | 0.03540200 | 0.03529300 | 0.03523000 | 0.03518800 | 0.03522400 | 0.03536000 | 0.03543200 | 0.03542200 |
| 0.03987500 | 0.03984500 | 0.03973100 | 0.03958800 | 0.03945500 | 0.03934100 | 0.03925400 | 0.03919100 | 0.03910400 | 0.03897600 | 0.03889800 | 0.03891600 | 0.03894900 | 0.03901200 |
| 0.05009400 | 0.05003000 | 0.04985500 | 0.04967700 | 0.04958200 | 0.04951700 | 0.04941100 | 0.04933800 | 0.04935200 | 0.04935500 | 0.04932100 | 0.04933000 | 0.04935700 | 0.04937700 |



| 6805       | 6807       | 6809       | 6811       | 6813       | 6815       | 6817       | 6818       | 6820       | 6822       | 6824       | 6826       | 6828       | 6830       |
|------------|------------|------------|------------|------------|------------|------------|------------|------------|------------|------------|------------|------------|------------|
| 0.06996600 | 0.07000200 | 0.06997100 | 0.06991400 | 0.06987500 | 0.06992000 | 0.07010500 | 0.07032800 | 0.07042600 | 0.07038600 | 0.07029700 | 0.07019700 | 0.07009700 | 0.07003000 |
| 0.06061700 | 0.06072400 | 0.06079100 | 0.06077100 | 0.06069300 | 0.06070100 | 0.06085200 | 0.06101700 | 0.06109300 | 0.06112200 | 0.06114900 | 0.06115000 | 0.06108900 | 0.06097200 |
| 0.07882500 | 0.07905600 | 0.07920400 | 0.07920700 | 0.07916100 | 0.07915300 | 0.07920700 | 0.07929600 | 0.07935700 | 0.07937800 | 0.07941300 | 0.07946100 | 0.07943200 | 0.07930300 |
| 0.07436600 | 0.07468100 | 0.07486100 | 0.07479400 | 0.07467500 | 0.07468600 | 0.07483500 | 0.07500500 | 0.07508200 | 0.07506600 | 0.07504300 | 0.07507000 | 0.07510300 | 0.07504600 |
| 0.04951900 | 0.04966800 | 0.04974900 | 0.04971700 | 0.04964700 | 0.04963400 | 0.04978000 | 0.05003100 | 0.05019100 | 0.05020700 | 0.05021000 | 0.05023400 | 0.05018100 | 0.05005100 |
| 0.07302000 | 0.07328000 | 0.07342500 | 0.07339500 | 0.07333500 | 0.07333300 | 0.07337800 | 0.07346700 | 0.07358800 | 0.07368100 | 0.07372100 | 0.07373500 | 0.07370500 | 0.07361300 |
| 0.07405700 | 0.07429100 | 0.07443100 | 0.07447500 | 0.07447400 | 0.07446300 | 0.07449800 | 0.07455000 | 0.07450400 | 0.07440100 | 0.07443600 | 0.07461000 | 0.07470200 | 0.07461900 |
| 0.05946600 | 0.05971900 | 0.05995900 | 0.06005400 | 0.06003800 | 0.06002400 | 0.06006600 | 0.06009300 | 0.06005300 | 0.06004500 | 0.06018700 | 0.06040600 | 0.06047800 | 0.06031000 |
| 0.06525100 | 0.06554700 | 0.06560000 | 0.06547200 | 0.06536900 | 0.06535600 | 0.06541300 | 0.06551000 | 0.06557100 | 0.06555800 | 0.06555800 | 0.06564700 | 0.06573600 | 0.06568000 |
| 0.06423900 | 0.06448700 | 0.06465900 | 0.06469600 | 0.06466900 | 0.06467000 | 0.06476900 | 0.06490400 | 0.06493300 | 0.06484300 | 0.06477700 | 0.06481800 | 0.06485100 | 0.06474400 |
| 0.07551500 | 0.07562100 | 0.07559100 | 0.07552200 | 0.07553300 | 0.07562600 | 0.07573800 | 0.07581500 | 0.07584100 | 0.07585700 | 0.07593500 | 0.07607100 | 0.07613900 | 0.07604300 |
| 0.06460700 | 0.06480500 | 0.06497900 | 0.06504900 | 0.06505600 | 0.06507700 | 0.06519500 | 0.06539500 | 0.06554600 | 0.06555700 | 0.06548500 | 0.06542200 | 0.06535300 | 0.06525100 |
| 0.05937300 | 0.05938500 | 0.05942700 | 0.05952300 | 0.05967400 | 0.05984600 | 0.06003500 | 0.06014600 | 0.06004900 | 0.05985000 | 0.05979900 | 0.05991600 | 0.05998000 | 0.05987300 |
| 0.03553100 | 0.03574300 | 0.03582500 | 0.03575100 | 0.03569900 | 0.03573400 | 0.03578400 | 0.03580400 | 0.03580400 | 0.03582700 | 0.03591400 | 0.03601000 | 0.03600900 | 0.03591500 |
| 0.03921700 | 0.03948400 | 0.03962700 | 0.03963600 | 0.03959700 | 0.03954800 | 0.03955000 | 0.03964600 | 0.03975300 | 0.03980700 | 0.03985200 | 0.03990500 | 0.03989000 | 0.03977000 |
| 0.04948000 | 0.04965300 | 0.04976300 | 0.04977700 | 0.04975700 | 0.04975000 | 0.04981500 | 0.04996500 | 0.05007700 | 0.05007500 | 0.05005000 | 0.05005400 | 0.05001100 | 0.04988100 |

| 6832       | 6834       | 6836       | 6838       | 6840       | 6842       | 6844       | 6845       | 6847       | 6849       | 6851       | 6853       | 6855       | 6857       |
|------------|------------|------------|------------|------------|------------|------------|------------|------------|------------|------------|------------|------------|------------|
| 0.07004100 | 0.07010100 | 0.07010900 | 0.07006600 | 0.07009100 | 0.07024300 | 0.07043500 | 0.07055800 | 0.07060100 | 0.07062700 | 0.07067300 | 0.07075400 | 0.07091200 | 0.07115700 |
| 0.06087300 | 0.06090200 | 0.06104700 | 0.06115600 | 0.06112900 | 0.06103500 | 0.06100900 | 0.06107700 | 0.06118400 | 0.06133500 | 0.06155900 | 0.06179400 | 0.06197000 | 0.06209900 |
| 0.07920800 | 0.07927400 | 0.07944900 | 0.07960800 | 0.07970100 | 0.07971600 | 0.07963300 | 0.07953200 | 0.07958700 | 0.07983300 | 0.08009900 | 0.08025700 | 0.08036900 | 0.08051700 |
| 0.07491800 | 0.07486100 | 0.07491600 | 0.07496700 | 0.07498200 | 0.07502800 | 0.07508800 | 0.07507300 | 0.07503400 | 0.07513600 | 0.07538800 | 0.07564900 | 0.07586200 | 0.07604400 |
| 0.04998500 | 0.05007000 | 0.05024900 | 0.05040900 | 0.05049300 | 0.05050600 | 0.05046000 | 0.05040100 | 0.05042700 | 0.05057500 | 0.05074400 | 0.05081300 | 0.05078600 | 0.05076700 |
| 0.07354100 | 0.07356800 | 0.07363400 | 0.07364600 | 0.07362800 | 0.07365900 | 0.07377000 | 0.07391800 | 0.07404100 | 0.07412100 | 0.07419900 | 0.07431700 | 0.07448400 | 0.07465200 |
| 0.07452800 | 0.07463700 | 0.07487400 | 0.07498800 | 0.07494000 | 0.07486700 | 0.07482000 | 0.07483300 | 0.07499600 | 0.07526600 | 0.07548900 | 0.07563900 | 0.07580000 | 0.07595300 |
| 0.06009800 | 0.06008100 | 0.06022500 | 0.06033600 | 0.06033900 | 0.06026900 | 0.06018700 | 0.06020700 | 0.06042600 | 0.06076300 | 0.06101800 | 0.06109600 | 0.06109200 | 0.06114900 |
| 0.06553600 | 0.06552100 | 0.06567200 | 0.06579600 | 0.06580700 | 0.06581300 | 0.06587400 | 0.06595600 | 0.06605800 | 0.06619200 | 0.06632400 | 0.06642000 | 0.06649900 | 0.06661400 |
| 0.06461700 | 0.06469200 | 0.06494300 | 0.06512300 | 0.06508500 | 0.06493900 | 0.06488600 | 0.06500300 | 0.06521400 | 0.06538300 | 0.06543900 | 0.06544400 | 0.06551000 | 0.06569900 |
| 0.07589900 | 0.07590800 | 0.07606000 | 0.07615700 | 0.07611200 | 0.07601700 | 0.07597900 | 0.07602000 | 0.07610300 | 0.07621500 | 0.07637000 | 0.07655900 | 0.07675600 | 0.07695500 |
| 0.06520300 | 0.06528600 | 0.06541500 | 0.06546700 | 0.06546700 | 0.06549800 | 0.06553400 | 0.06553700 | 0.06557400 | 0.06571100 | 0.06590600 | 0.06609200 | 0.06622900 | 0.06629300 |
| 0.05973400 | 0.05975600 | 0.05992600 | 0.06007500 | 0.06013000 | 0.06014800 | 0.06015200 | 0.06014000 | 0.06017200 | 0.06029400 | 0.06045700 | 0.06063000 | 0.06085000 | 0.06111200 |
| 0.03585700 | 0.03592300 | 0.03605400 | 0.03614900 | 0.03618700 | 0.03621400 | 0.03625200 | 0.03627800 | 0.03629900 | 0.03634000 | 0.03639200 | 0.03647100 | 0.03660800 | 0.03676700 |
| 0.03966900 | 0.03973900 | 0.03991900 | 0.04001700 | 0.03998400 | 0.03993100 | 0.03993600 | 0.03998400 | 0.04006500 | 0.04020900 | 0.04039400 | 0.04053800 | 0.04063100 | 0.04074700 |
| 0.04974000 | 0.04970600 | 0.04979200 | 0.04990200 | 0.04998700 | 0.05002500 | 0.05001700 | 0.05004900 | 0.05020200 | 0.05043900 | 0.05066000 | 0.05080200 | 0.05087400 | 0.05092600 |

| 6859       | 6861       | 6863       | 6865       | 6867       | 6869       | 6871       | 6872       | 6874       | 6876       | 6878       | 6880       | 6882       | 6884       |
|------------|------------|------------|------------|------------|------------|------------|------------|------------|------------|------------|------------|------------|------------|
| 0.07140600 | 0.07155300 | 0.07156000 | 0.07146900 | 0.07136100 | 0.07127200 | 0.07118300 | 0.07109100 | 0.07099100 | 0.07082900 | 0.07058600 | 0.07031800 | 0.07005800 | 0.06979500 |
| 0.06223000 | 0.06237100 | 0.06245500 | 0.06242300 | 0.06230000 | 0.06214200 | 0.06197400 | 0.06181400 | 0.06168400 | 0.06158000 | 0.06145100 | 0.06122000 | 0.06090700 | 0.06062500 |
| 0.08066700 | 0.08075600 | 0.08077400 | 0.08075900 | 0.08071700 | 0.08061800 | 0.08049400 | 0.08039000 | 0.08026500 | 0.08010100 | 0.07991500 | 0.07966000 | 0.07930300 | 0.07894200 |
| 0.07620200 | 0.07635300 | 0.07649400 | 0.07655300 | 0.07642200 | 0.07612900 | 0.07591900 | 0.07592000 | 0.07594100 | 0.07578800 | 0.07545700 | 0.07504000 | 0.07468800 | 0.07448600 |
| 0.05083100 | 0.05098800 | 0.05120000 | 0.05135100 | 0.05128500 | 0.05100900 | 0.05078200 | 0.05078900 | 0.05088700 | 0.05088900 | 0.05076700 | 0.05054900 | 0.05027000 | 0.05000100 |
| 0.07477400 | 0.07486700 | 0.07494500 | 0.07494200 | 0.07479000 | 0.07454300 | 0.07437700 | 0.07438700 | 0.07443500 | 0.07434100 | 0.07408700 | 0.07374200 | 0.07337100 | 0.07305000 |
| 0.07599400 | 0.07592600 | 0.07589600 | 0.07596500 | 0.07594500 | 0.07572700 | 0.07552900 | 0.07552700 | 0.07558300 | 0.07552800 | 0.07532500 | 0.07498500 | 0.07458700 | 0.07425500 |
| 0.06126800 | 0.06136000 | 0.06139600 | 0.06139200 | 0.06130200 | 0.06110200 | 0.06092700 | 0.06091600 | 0.06100600 | 0.06101600 | 0.06081500 | 0.06042300 | 0.06001700 | 0.05973900 |
| 0.06678800 | 0.06697900 | 0.06714100 | 0.06724300 | 0.06717500 | 0.06687900 | 0.06657000 | 0.06644800 | 0.06640600 | 0.06626600 | 0.06601400 | 0.06573400 | 0.06549100 | 0.06528400 |
| 0.06599500 | 0.06628100 | 0.06640400 | 0.06632200 | 0.06611400 | 0.06592800 | 0.06590800 | 0.06601400 | 0.06603400 | 0.06584100 | 0.06548800 | 0.06507500 | 0.06470500 | 0.06448000 |
| 0.07716100 | 0.07733800 | 0.07741000 | 0.07735800 | 0.07722500 | 0.07705500 | 0.07694300 | 0.07695600 | 0.07694200 | 0.07673000 | 0.07638200 | 0.07602700 | 0.07569000 | 0.07540100 |
| 0.06633100 | 0.06641300 | 0.06653300 | 0.06661700 | 0.06655200 | 0.06633200 | 0.06614400 | 0.06606800 | 0.06597200 | 0.06582400 | 0.06567300 | 0.06546700 | 0.06519500 | 0.06495800 |
| 0.06134000 | 0.06147800 | 0.06152600 | 0.06148700 | 0.06129700 | 0.06096700 | 0.06072500 | 0.06072000 | 0.06076500 | 0.06066300 | 0.06044400 | 0.06018600 | 0.05993600 | 0.05975700 |
| 0.03689300 | 0.03697900 | 0.03703100 | 0.03703500 | 0.03696300 | 0.03682700 | 0.03673100 | 0.03672800 | 0.03673600 | 0.03671700 | 0.03667700 | 0.03654300 | 0.03630800 | 0.03611300 |
| 0.04089400 | 0.04096100 | 0.04090600 | 0.04083900 | 0.04079900 | 0.04069700 | 0.04056500 | 0.04050600 | 0.04052600 | 0.04059400 | 0.04059000 | 0.04035900 | 0.04001000 | 0.03981600 |
| 0.05100400 | 0.05108800 | 0.05111500 | 0.05105200 | 0.05091800 | 0.05077800 | 0.05072400 | 0.05074000 | 0.05070700 | 0.05058400 | 0.05040700 | 0.05020700 | 0.05002600 | 0.04989000 |

| 6886       | 6888       | 6890       | 6892       | 6894       | 6896       | 6898       | 6899       | 6901       | 6903       | 6905       | 6907       | 6909       | 6911       |
|------------|------------|------------|------------|------------|------------|------------|------------|------------|------------|------------|------------|------------|------------|
| 0.06951600 | 0.06919300 | 0.06883100 | 0.06851600 | 0.06834200 | 0.06829400 | 0.06830100 | 0.06832200 | 0.06831000 | 0.06821100 | 0.06805800 | 0.06795600 | 0.06795000 | 0.06799000 |
| 0.06040300 | 0.06019500 | 0.05999900 | 0.05982100 | 0.05963300 | 0.05941400 | 0.05919100 | 0.05904100 | 0.05898900 | 0.05896300 | 0.05892400 | 0.05892800 | 0.05898600 | 0.05899900 |
| 0.07868100 | 0.07842500 | 0.07801100 | 0.07755600 | 0.07737700 | 0.07752400 | 0.07773100 | 0.07780700 | 0.07776300 | 0.07764200 | 0.07749800 | 0.07742700 | 0.07742500 | 0.07731400 |
| 0.07430400 | 0.07393100 | 0.07338200 | 0.07295500 | 0.07289400 | 0.07312600 | 0.07336700 | 0.07343300 | 0.07335900 | 0.07321500 | 0.07299900 | 0.07277900 | 0.07266900 | 0.07258400 |
| 0.04979500 | 0.04958800 | 0.04930800 | 0.04906600 | 0.04906100 | 0.04927500 | 0.04946300 | 0.04947000 | 0.04936100 | 0.04926100 | 0.04922100 | 0.04919400 | 0.04913000 | 0.04899100 |
| 0.07281000 | 0.07252700 | 0.07207100 | 0.07163700 | 0.07157100 | 0.07183900 | 0.07208200 | 0.07212700 | 0.07206200 | 0.07196200 | 0.07182700 | 0.07169400 | 0.07161500 | 0.07150500 |
| 0.07400700 | 0.07369400 | 0.07320500 | 0.07274100 | 0.07264500 | 0.07287500 | 0.07305100 | 0.07303000 | 0.07295100 | 0.07289500 | 0.07285500 | 0.07284100 | 0.07283000 | 0.07269000 |
| 0.05954400 | 0.05927100 | 0.05884300 | 0.05846100 | 0.05842100 | 0.05869500 | 0.05898000 | 0.05911100 | 0.05912500 | 0.05907800 | 0.05901800 | 0.05897600 | 0.05893800 | 0.05880900 |
| 0.06505600 | 0.06472100 | 0.06426300 | 0.06388300 | 0.06380000 | 0.06392400 | 0.06401600 | 0.06400600 | 0.06393500 | 0.06379000 | 0.06357400 | 0.06338700 | 0.06328500 | 0.06311800 |
| 0.06438000 | 0.06419600 | 0.06380200 | 0.06343700 | 0.06339100 | 0.06357700 | 0.06373100 | 0.06375900 | 0.06370400 | 0.06359000 | 0.06342600 | 0.06327600 | 0.06323900 | 0.06324800 |
| 0.07518100 | 0.07491100 | 0.07451300 | 0.07420000 | 0.07419600 | 0.07436100 | 0.07445000 | 0.07443200 | 0.07435000 | 0.07421600 | 0.07407300 | 0.07395800 | 0.07384100 | 0.07361200 |
| 0.06476800 | 0.06447400 | 0.06402500 | 0.06364300 | 0.06353900 | 0.06362700 | 0.06370100 | 0.06370300 | 0.06366100 | 0.06356800 | 0.06341500 | 0.06327200 | 0.06321500 | 0.06312200 |
| 0.05962400 | 0.05936700 | 0.05893900 | 0.05858900 | 0.05856200 | 0.05874200 | 0.05884500 | 0.05880300 | 0.05872200 | 0.05864000 | 0.05854700 | 0.05847000 | 0.05843100 | 0.05833000 |
| 0.03603500 | 0.03595800 | 0.03574300 | 0.03545800 | 0.03533300 | 0.03546200 | 0.03567000 | 0.03576500 | 0.03576300 | 0.03574400 | 0.03568700 | 0.03559800 | 0.03557000 | 0.03552900 |
| 0.03976600 | 0.03956300 | 0.03910100 | 0.03870900 | 0.03874800 | 0.03912700 | 0.03945600 | 0.03956100 | 0.03954800 | 0.03950700 | 0.03941200 | 0.03925300 | 0.03909800 | 0.03894700 |
| 0.04975900 | 0.04953600 | 0.04917400 | 0.04882600 | 0.04874000 | 0.04891800 | 0.04909100 | 0.04909000 | 0.04898400 | 0.04888900 | 0.04882600 | 0.04875900 | 0.04868700 | 0.04862300 |

| 6913       | 6915       | 6917       | 6919       | 6921       | 6923       | 6925       | 6926       | 6928       | 6930       | 6932       | 6934       | 6936       | 6938       |
|------------|------------|------------|------------|------------|------------|------------|------------|------------|------------|------------|------------|------------|------------|
| 0.06797100 | 0.06783100 | 0.06765900 | 0.06757400 | 0.06754700 | 0.06753500 | 0.06754800 | 0.06751700 | 0.06739800 | 0.06730500 | 0.06734500 | 0.06750100 | 0.06773000 | 0.06802100 |
| 0.05888100 | 0.05865700 | 0.05846700 | 0.05843600 | 0.05851400 | 0.05857700 | 0.05861300 | 0.05865300 | 0.05863600 | 0.05854400 | 0.05847100 | 0.05848800 | 0.05864600 | 0.05899200 |
| 0.07694400 | 0.07650800 | 0.07641600 | 0.07668500 | 0.07694000 | 0.07702500 | 0.07703000 | 0.07697200 | 0.07685900 | 0.07677800 | 0.07672800 | 0.07668100 | 0.07677500 | 0.07711100 |
| 0.07230400 | 0.07191500 | 0.07181900 | 0.07207500 | 0.07235900 | 0.07254000 | 0.07266200 | 0.07263800 | 0.07244000 | 0.07225200 | 0.07216400 | 0.07211200 | 0.07220700 | 0.07257700 |
| 0.04866700 | 0.04825600 | 0.04817700 | 0.04852700 | 0.04890800 | 0.04909600 | 0.04913100 | 0.04903200 | 0.04889300 | 0.04886200 | 0.04885500 | 0.04873600 | 0.04869800 | 0.04898000 |
| 0.07119500 | 0.07078500 | 0.07064500 | 0.07083200 | 0.07105600 | 0.07119400 | 0.07127400 | 0.07121700 | 0.07102900 | 0.07090400 | 0.07087700 | 0.07081500 | 0.07081500 | 0.07107800 |
| 0.07227300 | 0.07175600 | 0.07159900 | 0.07189100 | 0.07225500 | 0.07244800 | 0.07247100 | 0.07230500 | 0.07202000 | 0.07183700 | 0.07183100 | 0.07190100 | 0.07207500 | 0.07244000 |
| 0.05842800 | 0.05789000 | 0.05765800 | 0.05791400 | 0.05829200 | 0.05849000 | 0.05852100 | 0.05841900 | 0.05825200 | 0.05818200 | 0.05817900 | 0.05811800 | 0.05820200 | 0.05865800 |
| 0.06270100 | 0.06223000 | 0.06217800 | 0.06255000 | 0.06287600 | 0.06297800 | 0.06299600 | 0.06294500 | 0.06282600 | 0.06274800 | 0.06270100 | 0.06262900 | 0.06270200 | 0.06307500 |
| 0.06305000 | 0.06266200 | 0.06247500 | 0.06259900 | 0.06273500 | 0.06276400 | 0.06276900 | 0.06270000 | 0.06253000 | 0.06242100 | 0.06242600 | 0.06245300 | 0.06259200 | 0.06300300 |
| 0.07318600 | 0.07276700 | 0.07275500 | 0.07315100 | 0.07352700 | 0.07364600 | 0.07360000 | 0.07349500 | 0.07336700 | 0.07328600 | 0.07327600 | 0.07329700 | 0.07343500 | 0.07376900 |
| 0.06275100 | 0.06227700 | 0.06225100 | 0.06269500 | 0.06304600 | 0.06305700 | 0.06290800 | 0.06270300 | 0.06249900 | 0.06240400 | 0.06237600 | 0.06236200 | 0.06256100 | 0.06309500 |
| 0.05799900 | 0.05756400 | 0.05745400 | 0.05776000 | 0.05811900 | 0.05828600 | 0.05824500 | 0.05799900 | 0.05768200 | 0.05756800 | 0.05769600 | 0.05785600 | 0.05801900 | 0.05830500 |
| 0.03524800 | 0.03485200 | 0.03477500 | 0.03503600 | 0.03528200 | 0.03539800 | 0.03544400 | 0.03542300 | 0.03540800 | 0.03548000 | 0.03553100 | 0.03547700 | 0.03549800 | 0.03572900 |
| 0.03866900 | 0.03835200 | 0.03836200 | 0.03872200 | 0.03903200 | 0.03909600 | 0.03903100 | 0.03896800 | 0.03896800 | 0.03902400 | 0.03902900 | 0.03894600 | 0.03897100 | 0.03923200 |
| 0.04845200 | 0.04818400 | 0.04813200 | 0.04839200 | 0.04867200 | 0.04882600 | 0.04889800 | 0.04885000 | 0.04869300 | 0.04856300 | 0.04848100 | 0.04838700 | 0.04840200 | 0.04865800 |

| 6940       | 6942       | 6944       | 6946       | 6948       | 6950       | 6952       | 6953       | 6955       | 6957       | 6959       | 6961       | 6963       | 6965       |
|------------|------------|------------|------------|------------|------------|------------|------------|------------|------------|------------|------------|------------|------------|
| 0.06836700 | 0.06870900 | 0.06891500 | 0.06889900 | 0.06871400 | 0.06843900 | 0.06804200 | 0.06748000 | 0.06685000 | 0.06628400 | 0.06581200 | 0.06542500 | 0.06513500 | 0.06496300 |
| 0.05942900 | 0.05976900 | 0.05991600 | 0.05986000 | 0.05959800 | 0.05915000 | 0.05860700 | 0.05812200 | 0.05775900 | 0.05739600 | 0.05695800 | 0.05658700 | 0.05637700 | 0.05618800 |
| 0.07755700 | 0.07792200 | 0.07809800 | 0.07805500 | 0.07784000 | 0.07745400 | 0.07684300 | 0.07615200 | 0.07570600 | 0.07551300 | 0.07524800 | 0.07483800 | 0.07454900 | 0.07441600 |
| 0.07302100 | 0.07326500 | 0.07329100 | 0.07329500 | 0.07334500 | 0.07316900 | 0.07254400 | 0.07173000 | 0.07117000 | 0.07090400 | 0.07065900 | 0.07034700 | 0.07009200 | 0.06991900 |
| 0.04941000 | 0.04964000 | 0.04960800 | 0.04953700 | 0.04954800 | 0.04941100 | 0.04893400 | 0.04837800 | 0.04811500 | 0.04810500 | 0.04807000 | 0.04794700 | 0.04782600 | 0.04765200 |
| 0.07149300 | 0.07181200 | 0.07199800 | 0.07216200 | 0.07227300 | 0.07208800 | 0.07146600 | 0.07065800 | 0.07005600 | 0.06971200 | 0.06940700 | 0.06907000 | 0.06880400 | 0.06861600 |
| 0.07288700 | 0.07321900 | 0.07334900 | 0.07333800 | 0.07326000 | 0.07298600 | 0.07237800 | 0.07164500 | 0.07108600 | 0.07068400 | 0.07032600 | 0.07005800 | 0.06989700 | 0.06973200 |
| 0.05923300 | 0.05948400 | 0.05935000 | 0.05913300 | 0.05900800 | 0.05876100 | 0.05820100 | 0.05755800 | 0.05721400 | 0.05716500 | 0.05709300 | 0.05686700 | 0.05663800 | 0.05649700 |
| 0.06359000 | 0.06397900 | 0.06413000 | 0.06409800 | 0.06393100 | 0.06352200 | 0.06284700 | 0.06216800 | 0.06173800 | 0.06148000 | 0.06120900 | 0.06090900 | 0.06065100 | 0.06041400 |
| 0.06354200 | 0.06392700 | 0.06406800 | 0.06406200 | 0.06396200 | 0.06365100 | 0.06305400 | 0.06237900 | 0.06189800 | 0.06157900 | 0.06124300 | 0.06092800 | 0.06077300 | 0.06070100 |
| 0.07414800 | 0.07439500 | 0.07451600 | 0.07456300 | 0.07447900 | 0.07412500 | 0.07347100 | 0.07276300 | 0.07229800 | 0.07204900 | 0.07176900 | 0.07141600 | 0.07112900 | 0.07089700 |
| 0.06367200 | 0.06396000 | 0.06398200 | 0.06393900 | 0.06384000 | 0.06346300 | 0.06272800 | 0.06195300 | 0.06151700 | 0.06135900 | 0.06113700 | 0.06079000 | 0.06052500 | 0.06033900 |
| 0.05863100 | 0.05879600 | 0.05880500 | 0.05883600 | 0.05889200 | 0.05868800 | 0.05807300 | 0.05735400 | 0.05690700 | 0.05670800 | 0.05652200 | 0.05629700 | 0.05611600 | 0.05594700 |
| 0.03599600 | 0.03607800 | 0.03602300 | 0.03605600 | 0.03621700 | 0.03620800 | 0.03581400 | 0.03528900 | 0.03503000 | 0.03506400 | 0.03513600 | 0.03509700 | 0.03496700 | 0.03476500 |
| 0.03954700 | 0.03972700 | 0.03980300 | 0.03985600 | 0.03984100 | 0.03961500 | 0.03916000 | 0.03871100 | 0.03849500 | 0.03845000 | 0.03840200 | 0.03836200 | 0.03839800 | 0.03838200 |
| 0.04904400 | 0.04935900 | 0.04949400 | 0.04950600 | 0.04948900 | 0.04930400 | 0.04879200 | 0.04818100 | 0.04782400 | 0.04768900 | 0.04753600 | 0.04733400 | 0.04718900 | 0.04709400 |

| 6967       | 6969       | 6971       | 6973       | 6975       | 6977       | 6979       | 6980       | 6982       | 6984       | 6986       | 6988       | 6990       | 6992       |
|------------|------------|------------|------------|------------|------------|------------|------------|------------|------------|------------|------------|------------|------------|
| 0.06488800 | 0.06482000 | 0.06468800 | 0.06454600 | 0.06448800 | 0.06452500 | 0.06461300 | 0.06475000 | 0.06497300 | 0.06529000 | 0.06564700 | 0.06599000 | 0.06631100 | 0.06663000 |
| 0.05590900 | 0.05563300 | 0.05548100 | 0.05546700 | 0.05554700 | 0.05565900 | 0.05574000 | 0.05581100 | 0.05599100 | 0.05633100 | 0.05672200 | 0.05703600 | 0.05730500 | 0.05761500 |
| 0.07417300 | 0.07378800 | 0.07357100 | 0.07367400 | 0.07387000 | 0.07386900 | 0.07370400 | 0.07368900 | 0.07394600 | 0.07431200 | 0.07473100 | 0.07521300 | 0.07565200 | 0.07598400 |
| 0.06970800 | 0.06944500 | 0.06931100 | 0.06940300 | 0.06953500 | 0.06947500 | 0.06927900 | 0.06923400 | 0.06949500 | 0.06997500 | 0.07055400 | 0.07107700 | 0.07135000 | 0.07140400 |
| 0.04733900 | 0.04704100 | 0.04700400 | 0.04720100 | 0.04737200 | 0.04734700 | 0.04719500 | 0.04712000 | 0.04722500 | 0.04748100 | 0.04787900 | 0.04834600 | 0.04871100 | 0.04891200 |
| 0.06835100 | 0.06798900 | 0.06778600 | 0.06792000 | 0.06819700 | 0.06830600 | 0.06819200 | 0.06806800 | 0.06813800 | 0.06844800 | 0.06894800 | 0.06949500 | 0.06993600 | 0.07024500 |
| 0.06946900 | 0.06917000 | 0.06904900 | 0.06919600 | 0.06938700 | 0.06935600 | 0.06914400 | 0.06900500 | 0.06908500 | 0.06939100 | 0.06988000 | 0.07038700 | 0.07074000 | 0.07098600 |
| 0.05633800 | 0.05610500 | 0.05596400 | 0.05602800 | 0.05611500 | 0.05600800 | 0.05580700 | 0.05576700 | 0.05592100 | 0.05618200 | 0.05658500 | 0.05707700 | 0.05744400 | 0.05765000 |
| 0.06012000 | 0.05978600 | 0.05959900 | 0.05971300 | 0.05997100 | 0.06004800 | 0.05991300 | 0.05986600 | 0.06005800 | 0.06037400 | 0.06077400 | 0.06124100 | 0.06161600 | 0.06187300 |
| 0.06053900 | 0.06028700 | 0.06011400 | 0.06015600 | 0.06032400 | 0.06036000 | 0.06017200 | 0.06003800 | 0.06024000 | 0.06072100 | 0.06128800 | 0.06179500 | 0.06214200 | 0.06234600 |
| 0.07062700 | 0.07040200 | 0.07038700 | 0.07055300 | 0.07067400 | 0.07057600 | 0.07036700 | 0.07031200 | 0.07047900 | 0.07078700 | 0.07123600 | 0.07176900 | 0.07221400 | 0.07253000 |
| 0.06003200 | 0.05963800 | 0.05943100 | 0.05952900 | 0.05975300 | 0.05983800 | 0.05972400 | 0.05965000 | 0.05984600 | 0.06028800 | 0.06082400 | 0.06128600 | 0.06156900 | 0.06176100 |
| 0.05566200 | 0.05530500 | 0.05514000 | 0.05528700 | 0.05549300 | 0.05545600 | 0.05523500 | 0.05517100 | 0.05539500 | 0.05573900 | 0.05611700 | 0.05655400 | 0.05694800 | 0.05720500 |
| 0.03447600 | 0.03422100 | 0.03421600 | 0.03444300 | 0.03460900 | 0.03451700 | 0.03429100 | 0.03422100 | 0.03440300 | 0.03469800 | 0.03500400 | 0.03530400 | 0.03556600 | 0.03579600 |
| 0.03813700 | 0.03777300 | 0.03759800 | 0.03769000 | 0.03778200 | 0.03765000 | 0.03743000 | 0.03743600 | 0.03773900 | 0.03817200 | 0.03862000 | 0.03900100 | 0.03919700 | 0.03921700 |
| 0.04695600 | 0.04678600 | 0.04674600 | 0.04690000 | 0.04703300 | 0.04691500 | 0.04665500 | 0.04654900 | 0.04667500 | 0.04690700 | 0.04723400 | 0.04767400 | 0.04810200 | 0.04841100 |

| 6994       | 6996       | 6998       | 7000       | 7002       | 7004       | 7006       | 7007       | 7009       | 7011       | 7013       | 7015       | 7017       | 7019       |
|------------|------------|------------|------------|------------|------------|------------|------------|------------|------------|------------|------------|------------|------------|
| 0.06690500 | 0.06707000 | 0.06716400 | 0.06728500 | 0.06743700 | 0.06755400 | 0.06763100 | 0.06771200 | 0.06778200 | 0.06783500 | 0.06792800 | 0.06810700 | 0.06832000 | 0.06846200 |
| 0.05789700 | 0.05803600 | 0.05808800 | 0.05818800 | 0.05835000 | 0.05849200 | 0.05859300 | 0.05868400 | 0.05874600 | 0.05875000 | 0.05877300 | 0.05893100 | 0.05919000 | 0.05940100 |
| 0.07622800 | 0.07634800 | 0.07631000 | 0.07622700 | 0.07631100 | 0.07664200 | 0.07705500 | 0.07731800 | 0.07734700 | 0.07726300 | 0.07724700 | 0.07736000 | 0.07748000 | 0.07744400 |
| 0.07147200 | 0.07164300 | 0.07179700 | 0.07186000 | 0.07191900 | 0.07207500 | 0.07231500 | 0.07254500 | 0.07263500 | 0.07255000 | 0.07248700 | 0.07265800 | 0.07294600 | 0.07303300 |
| 0.04900900 | 0.04902800 | 0.04897300 | 0.04891000 | 0.04891900 | 0.04903100 | 0.04922800 | 0.04947200 | 0.04964000 | 0.04961200 | 0.04948500 | 0.04945900 | 0.04952500 | 0.04953600 |
| 0.07046700 | 0.07061300 | 0.07066800 | 0.07065800 | 0.07069600 | 0.07088800 | 0.07122300 | 0.07155700 | 0.07169500 | 0.07159100 | 0.07146000 | 0.07151200 | 0.07163700 | 0.07158700 |
| 0.07121800 | 0.07139600 | 0.07150900 | 0.07164700 | 0.07182700 | 0.07198500 | 0.07213300 | 0.07228700 | 0.07239100 | 0.07243800 | 0.07253200 | 0.07275300 | 0.07299800 | 0.07304500 |
| 0.05783700 | 0.05802000 | 0.05811400 | 0.05816400 | 0.05828900 | 0.05850400 | 0.05874100 | 0.05892400 | 0.05896200 | 0.05886800 | 0.05884800 | 0.05905500 | 0.05931900 | 0.05935000 |
| 0.06213800 | 0.06235800 | 0.06241600 | 0.06239600 | 0.06244400 | 0.06258700 | 0.06279300 | 0.06300400 | 0.06312800 | 0.06315500 | 0.06323300 | 0.06344800 | 0.06362900 | 0.06355400 |
| 0.06248900 | 0.06260700 | 0.06271400 | 0.06281100 | 0.06289400 | 0.06300800 | 0.06321100 | 0.06346400 | 0.06361900 | 0.06362100 | 0.06360100 | 0.06367400 | 0.06377900 | 0.06377300 |
| 0.07279200 | 0.07299000 | 0.07305000 | 0.07297900 | 0.07291200 | 0.07299600 | 0.07325000 | 0.07354800 | 0.07373700 | 0.07379000 | 0.07385100 | 0.07403700 | 0.07422700 | 0.07420900 |
| 0.06198200 | 0.06213200 | 0.06211400 | 0.06207700 | 0.06220500 | 0.06247800 | 0.06278700 | 0.06305100 | 0.06317400 | 0.06311600 | 0.06305100 | 0.06320600 | 0.06346200 | 0.06344500 |
| 0.05738200 | 0.05755700 | 0.05768600 | 0.05772200 | 0.05775400 | 0.05789800 | 0.05813300 | 0.05836100 | 0.05849300 | 0.05849100 | 0.05848100 | 0.05861700 | 0.05879500 | 0.05880900 |
| 0.03601100 | 0.03616200 | 0.03621800 | 0.03624700 | 0.03631400 | 0.03639500 | 0.03647800 | 0.03660700 | 0.03674300 | 0.03678700 | 0.03676200 | 0.03678200 | 0.03684100 | 0.03683000 |
| 0.03921000 | 0.03924100 | 0.03926600 | 0.03931100 | 0.03946300 | 0.03970100 | 0.03992500 | 0.04009500 | 0.04018000 | 0.04016000 | 0.04015200 | 0.04026900 | 0.04041700 | 0.04043900 |
| 0.04861300 | 0.04870100 | 0.04865800 | 0.04856000 | 0.04851000 | 0.04858700 | 0.04885700 | 0.04922300 | 0.04942900 | 0.04940500 | 0.04937600 | 0.04949400 | 0.04960700 | 0.04951300 |



| 7021       | 7023       | 7025       | 7027       | 7029       | 7031       | 7033       | 7034       | 7036       | 7038       | 7040       | 7042       | 7044       | 7046       |
|------------|------------|------------|------------|------------|------------|------------|------------|------------|------------|------------|------------|------------|------------|
| 0.06850400 | 0.06853100 | 0.06862600 | 0.06879300 | 0.06899100 | 0.06919900 | 0.06943600 | 0.06970400 | 0.06995700 | 0.07013400 | 0.07018300 | 0.07009500 | 0.06997300 | 0.06996500 |
| 0.05951200 | 0.05959000 | 0.05966600 | 0.05977200 | 0.05998200 | 0.06026200 | 0.06048500 | 0.06064300 | 0.06084800 | 0.06110800 | 0.06129600 | 0.06133700 | 0.06127200 | 0.06117000 |
| 0.07730100 | 0.07730200 | 0.07757600 | 0.07801600 | 0.07844800 | 0.07870600 | 0.07875600 | 0.07878700 | 0.07898100 | 0.07927900 | 0.07941200 | 0.07920200 | 0.07886000 | 0.07884000 |
| 0.07288700 | 0.07284000 | 0.07311700 | 0.07359000 | 0.07403500 | 0.07431700 | 0.07445700 | 0.07454600 | 0.07460700 | 0.07462200 | 0.07455700 | 0.07434700 | 0.07406600 | 0.07401400 |
| 0.04952000 | 0.04963600 | 0.04989100 | 0.05019100 | 0.05049400 | 0.05075700 | 0.05092000 | 0.05098700 | 0.05100700 | 0.05096300 | 0.05078200 | 0.05048400 | 0.05024500 | 0.05030200 |
| 0.07145800 | 0.07161800 | 0.07212200 | 0.07262700 | 0.07290400 | 0.07300900 | 0.07305300 | 0.07311400 | 0.07324600 | 0.07337800 | 0.07335500 | 0.07311200 | 0.07283600 | 0.07288300 |
| 0.07287700 | 0.07277300 | 0.07295400 | 0.07336900 | 0.07381100 | 0.07409700 | 0.07422800 | 0.07434000 | 0.07449300 | 0.07458200 | 0.07446300 | 0.07414400 | 0.07385500 | 0.07386800 |
| 0.05916500 | 0.05906700 | 0.05923500 | 0.05959300 | 0.05997800 | 0.06025100 | 0.06040000 | 0.06055900 | 0.06080000 | 0.06095300 | 0.06080100 | 0.06039200 | 0.06004800 | 0.06010700 |
| 0.06331400 | 0.06325900 | 0.06354000 | 0.06397000 | 0.06432200 | 0.06452700 | 0.06467200 | 0.06486200 | 0.06506900 | 0.06518000 | 0.06509300 | 0.06475900 | 0.06434300 | 0.06427700 |
| 0.06366500 | 0.06367300 | 0.06390900 | 0.06424000 | 0.06455200 | 0.06482500 | 0.06501400 | 0.06512100 | 0.06525800 | 0.06546200 | 0.06552000 | 0.06521500 | 0.06471700 | 0.06455800 |
| 0.07405300 | 0.07405600 | 0.07429400 | 0.07460100 | 0.07489500 | 0.07518200 | 0.07544200 | 0.07565800 | 0.07583300 | 0.07592300 | 0.07581900 | 0.07549800 | 0.07519400 | 0.07523700 |
| 0.06312600 | 0.06295700 | 0.06325900 | 0.06383100 | 0.06429100 | 0.06447900 | 0.06450300 | 0.06454600 | 0.06468700 | 0.06484100 | 0.06485900 | 0.06464600 | 0.06432500 | 0.06426700 |
| 0.05872300 | 0.05881300 | 0.05917400 | 0.05962100 | 0.05995600 | 0.06013400 | 0.06023100 | 0.06036300 | 0.06056500 | 0.06070800 | 0.06060600 | 0.06021600 | 0.05975900 | 0.05961500 |
| 0.03678100 | 0.03689300 | 0.03721300 | 0.03758300 | 0.03786900 | 0.03801400 | 0.03804400 | 0.03807800 | 0.03818500 | 0.03829000 | 0.03822800 | 0.03792900 | 0.03761900 | 0.03767400 |
| 0.04036100 | 0.04036600 | 0.04057200 | 0.04091200 | 0.04120500 | 0.04134300 | 0.04138900 | 0.04145400 | 0.04156700 | 0.04163200 | 0.04148800 | 0.04114800 | 0.04090800 | 0.04106100 |
| 0.04930200 | 0.04926700 | 0.04952000 | 0.04992100 | 0.05031000 | 0.05058600 | 0.05071200 | 0.05074300 | 0.05078400 | 0.05083800 | 0.05075900 | 0.05046200 | 0.05016000 | 0.05021700 |

| 7048       | 7050       | 7052       | 7054       | 7056       | 7058       | 7060       | 7061       | 7063       | 7065       | 7067       | 7069       | 7071       | 7073       |
|------------|------------|------------|------------|------------|------------|------------|------------|------------|------------|------------|------------|------------|------------|
| 0.07007300 | 0.07014300 | 0.07009800 | 0.07000700 | 0.06991100 | 0.06977600 | 0.06962000 | 0.06953200 | 0.06950300 | 0.06944900 | 0.06940700 | 0.06948100 | 0.06966300 | 0.06988200 |
| 0.06106000 | 0.06094100 | 0.06086900 | 0.06092500 | 0.06106900 | 0.06117700 | 0.06118900 | 0.06112600 | 0.06103300 | 0.06091700 | 0.06078000 | 0.06069500 | 0.06075400 | 0.06090700 |
| 0.07919500 | 0.07944500 | 0.07936700 | 0.07928100 | 0.07939500 | 0.07953500 | 0.07950000 | 0.07924500 | 0.07881500 | 0.07825200 | 0.07767400 | 0.07746400 | 0.07793400 | 0.07875000 |
| 0.07430900 | 0.07462500 | 0.07472200 | 0.07477500 | 0.07495400 | 0.07513200 | 0.07512500 | 0.07487300 | 0.07437700 | 0.07368000 | 0.07299000 | 0.07273400 | 0.07318900 | 0.07403600 |
| 0.05066200 | 0.05097700 | 0.05102200 | 0.05099800 | 0.05108900 | 0.05121400 | 0.05124600 | 0.05108700 | 0.05068800 | 0.05011100 | 0.04956600 | 0.04943300 | 0.04994800 | 0.05074800 |
| 0.07326300 | 0.07349500 | 0.07337200 | 0.07329400 | 0.07349900 | 0.07369300 | 0.07361800 | 0.07334000 | 0.07292100 | 0.07232300 | 0.07168600 | 0.07144100 | 0.07189000 | 0.07272600 |
| 0.07415500 | 0.07435700 | 0.07433600 | 0.07434500 | 0.07451200 | 0.07467200 | 0.07466900 | 0.07444200 | 0.07400300 | 0.07342700 | 0.07286100 | 0.07264500 | 0.07307000 | 0.07388800 |
| 0.06052100 | 0.06083900 | 0.06086000 | 0.06086500 | 0.06103900 | 0.06118900 | 0.06112000 | 0.06085700 | 0.06048500 | 0.05997900 | 0.05942700 | 0.05923800 | 0.05970000 | 0.06046000 |
| 0.06469900 | 0.06511900 | 0.06517700 | 0.06511200 | 0.06518800 | 0.06533900 | 0.06541400 | 0.06529400 | 0.06488200 | 0.06418300 | 0.06346000 | 0.06321000 | 0.06367400 | 0.06443700 |
| 0.06495200 | 0.06541700 | 0.06551100 | 0.06546000 | 0.06560300 | 0.06581600 | 0.06583700 | 0.06561900 | 0.06519100 | 0.06455100 | 0.06387100 | 0.06360400 | 0.06406600 | 0.06496000 |
| 0.07556800 | 0.07576400 | 0.07569400 | 0.07566900 | 0.07586100 | 0.07606200 | 0.07605300 | 0.07584400 | 0.07549600 | 0.07496100 | 0.07434500 | 0.07413600 | 0.07464700 | 0.07546800 |
| 0.06461100 | 0.06495900 | 0.06498600 | 0.06489100 | 0.06495800 | 0.06514100 | 0.06522100 | 0.06507200 | 0.06467900 | 0.06403600 | 0.06329800 | 0.06295300 | 0.06339200 | 0.06430500 |
| 0.05989900 | 0.06023100 | 0.06028700 | 0.06024800 | 0.06038300 | 0.06062700 | 0.06074000 | 0.06057000 | 0.06012500 | 0.05952000 | 0.05894700 | 0.05875300 | 0.05920100 | 0.06002200 |
| 0.03808300 | 0.03839600 | 0.03840300 | 0.03838500 | 0.03857800 | 0.03883700 | 0.03893500 | 0.03880600 | 0.03843300 | 0.03779200 | 0.03709100 | 0.03682000 | 0.03726400 | 0.03806500 |
| 0.04150200 | 0.04180900 | 0.04182100 | 0.04179700 | 0.04193900 | 0.04214100 | 0.04221900 | 0.04208800 | 0.04174400 | 0.04121200 | 0.04062400 | 0.04036800 | 0.04079900 | 0.04164800 |
| 0.05064000 | 0.05100200 | 0.05108500 | 0.05110900 | 0.05123700 | 0.05134300 | 0.05127400 | 0.05100500 | 0.05057500 | 0.05001600 | 0.04945600 | 0.04924200 | 0.04967500 | 0.05048600 |

| 7075       | 7077       | 7079       | 7081       | 7083       | 7085       | 7087       | 7088       | 7090       | 7092       | 7094       | 7096       | 7098       | 7100       |
|------------|------------|------------|------------|------------|------------|------------|------------|------------|------------|------------|------------|------------|------------|
| 0.07005400 | 0.07010900 | 0.07006500 | 0.07001100 | 0.07003100 | 0.07015600 | 0.07034300 | 0.07050000 | 0.07057200 | 0.07059100 | 0.07066000 | 0.07082700 | 0.07104500 | 0.07124000 |
| 0.06102100 | 0.06106400 | 0.06109700 | 0.06114400 | 0.06118700 | 0.06125600 | 0.06140800 | 0.06157900 | 0.06160900 | 0.06150900 | 0.06149200 | 0.06164400 | 0.06185400 | 0.06206200 |
| 0.07924400 | 0.07919000 | 0.07895300 | 0.07894000 | 0.07916600 | 0.07946500 | 0.07972300 | 0.07967200 | 0.07900000 | 0.07802500 | 0.07776000 | 0.07860600 | 0.07971900 | 0.08017900 |
| 0.07464400 | 0.07473900 | 0.07459300 | 0.07458700 | 0.07477000 | 0.07500200 | 0.07520300 | 0.07519300 | 0.07467800 | 0.07387100 | 0.07370000 | 0.07458500 | 0.07572200 | 0.07612600 |
| 0.05122400 | 0.05123000 | 0.05109300 | 0.05112100 | 0.05132800 | 0.05158800 | 0.05175800 | 0.05158900 | 0.05084700 | 0.04986400 | 0.04960300 | 0.05043500 | 0.05148900 | 0.05180300 |
| 0.07334500 | 0.07353200 | 0.07356300 | 0.07369800 | 0.07388700 | 0.07402700 | 0.07408000 | 0.07387100 | 0.07317200 | 0.07227400 | 0.07210100 | 0.07301400 | 0.07411800 | 0.07443100 |
| 0.07448700 | 0.07457800 | 0.07445800 | 0.07452500 | 0.07475800 | 0.07496700 | 0.07509100 | 0.07494500 | 0.07425600 | 0.07330100 | 0.07307800 | 0.07404000 | 0.07525300 | 0.07561400 |
| 0.06089700 | 0.06084000 | 0.06064000 | 0.06065900 | 0.06089500 | 0.06117300 | 0.06135700 | 0.06122500 | 0.06056300 | 0.05971100 | 0.05959400 | 0.06049000 | 0.06152600 | 0.06186200 |
| 0.06488100 | 0.06487300 | 0.06478600 | 0.06492700 | 0.06517700 | 0.06535600 | 0.06546800 | 0.06535600 | 0.06471400 | 0.06382300 | 0.06368100 | 0.06463300 | 0.06575300 | 0.06609800 |
| 0.06564500 | 0.06577400 | 0.06556200 | 0.06543100 | 0.06551300 | 0.06572800 | 0.06597500 | 0.06594500 | 0.06529600 | 0.06438000 | 0.06419100 | 0.06503100 | 0.06605700 | 0.06645800 |
| 0.07596900 | 0.07599100 | 0.07584000 | 0.07584400 | 0.07602100 | 0.07629300 | 0.07660600 | 0.07661100 | 0.07589800 | 0.07485500 | 0.07460100 | 0.07546000 | 0.07650100 | 0.07685700 |
| 0.06496500 | 0.06504900 | 0.06488800 | 0.06491400 | 0.06515600 | 0.06543500 | 0.06558200 | 0.06534600 | 0.06456500 | 0.06364100 | 0.06348600 | 0.06438500 | 0.06545500 | 0.06578500 |
| 0.06063100 | 0.06075500 | 0.06063000 | 0.06060200 | 0.06074700 | 0.06099400 | 0.06123600 | 0.06115200 | 0.06043200 | 0.05943500 | 0.05917600 | 0.06001900 | 0.06109400 | 0.06149200 |
| 0.03861100 | 0.03870200 | 0.03865100 | 0.03877800 | 0.03901700 | 0.03920600 | 0.03933800 | 0.03924800 | 0.03860100 | 0.03766400 | 0.03743500 | 0.03827900 | 0.03930500 | 0.03956900 |
| 0.04226000 | 0.04234700 | 0.04220000 | 0.04221100 | 0.04238500 | 0.04252600 | 0.04256500 | 0.04234900 | 0.04163600 | 0.04076500 | 0.04068200 | 0.04160600 | 0.04260600 | 0.04288500 |
| 0.05104400 | 0.05110700 | 0.05098300 | 0.05101700 | 0.05122100 | 0.05145000 | 0.05159700 | 0.05147700 | 0.05085800 | 0.04996100 | 0.04968000 | 0.05049500 | 0.05160200 | 0.05194400 |

| 7102       | 7104       | 7106       | 7108       | 7110       | 7112       | 7114       | 7115       | 7117       | 7119       | 7121       | 7123       | 7125       | 7127       |
|------------|------------|------------|------------|------------|------------|------------|------------|------------|------------|------------|------------|------------|------------|
| 0.07131600 | 0.07125900 | 0.07123600 | 0.07140700 | 0.07172400 | 0.07198200 | 0.07200200 | 0.07184400 | 0.07182600 | 0.07205500 | 0.07226900 | 0.07229100 | 0.07219200 | 0.07211400 |
| 0.06221000 | 0.06222300 | 0.06222900 | 0.06245800 | 0.06288400 | 0.06323400 | 0.06327200 | 0.06308600 | 0.06304400 | 0.06326200 | 0.06346300 | 0.06344900 | 0.06329100 | 0.06317200 |
| 0.07980200 | 0.07914800 | 0.07911900 | 0.07993400 | 0.08083400 | 0.08087000 | 0.07967900 | 0.07820800 | 0.07813600 | 0.07952200 | 0.08092700 | 0.08162300 | 0.08184400 | 0.08191100 |
| 0.07555100 | 0.07465400 | 0.07450200 | 0.07535300 | 0.07639700 | 0.07665200 | 0.07569300 | 0.07432700 | 0.07413700 | 0.07526700 | 0.07642500 | 0.07695700 | 0.07707500 | 0.07708100 |
| 0.05120900 | 0.05038000 | 0.05029900 | 0.05117900 | 0.05224300 | 0.05253800 | 0.05160400 | 0.05016600 | 0.04983200 | 0.05088900 | 0.05210700 | 0.05275900 | 0.05297200 | 0.05300700 |
| 0.07382800 | 0.07305600 | 0.07313700 | 0.07415800 | 0.07515400 | 0.07516400 | 0.07392100 | 0.07238900 | 0.07224700 | 0.07360600 | 0.07502500 | 0.07570600 | 0.07582700 | 0.07580400 |
| 0.07497600 | 0.07414200 | 0.07413600 | 0.07508200 | 0.07612100 | 0.07629800 | 0.07522000 | 0.07374100 | 0.07352800 | 0.07474400 | 0.07604800 | 0.07676500 | 0.07707500 | 0.07718200 |
| 0.06140700 | 0.06073600 | 0.06069600 | 0.06150100 | 0.06246600 | 0.06265000 | 0.06160100 | 0.06015700 | 0.05993400 | 0.06106500 | 0.06227700 | 0.06289900 | 0.06305500 | 0.06303200 |
| 0.06554100 | 0.06478700 | 0.06484800 | 0.06586900 | 0.06694900 | 0.06709600 | 0.06594000 | 0.06441400 | 0.06419200 | 0.06536700 | 0.06658600 | 0.06716900 | 0.06729900 | 0.06730300 |
| 0.06606600 | 0.06535900 | 0.06523500 | 0.06602300 | 0.06706600 | 0.06744000 | 0.06662000 | 0.06523100 | 0.06489100 | 0.06595400 | 0.06712500 | 0.06764000 | 0.06774200 | 0.06778100 |
| 0.07642300 | 0.07579100 | 0.07580700 | 0.07661400 | 0.07752000 | 0.07770200 | 0.07673800 | 0.07536600 | 0.07517800 | 0.07639200 | 0.07770900 | 0.07837100 | 0.07853700 | 0.07856400 |
| 0.06527700 | 0.06459700 | 0.06463800 | 0.06553500 | 0.06649400 | 0.06661700 | 0.06557100 | 0.06418600 | 0.06403600 | 0.06528400 | 0.06661900 | 0.06727600 | 0.06737700 | 0.06730700 |
| 0.06102800 | 0.06027800 | 0.06019500 | 0.06097000 | 0.06182400 | 0.06193000 | 0.06097600 | 0.05970600 | 0.05962300 | 0.06086300 | 0.06211200 | 0.06268300 | 0.06286300 | 0.06303100 |
| 0.03893900 | 0.03811000 | 0.03804200 | 0.03885400 | 0.03971000 | 0.03974900 | 0.03870300 | 0.03740800 | 0.03734200 | 0.03856100 | 0.03978900 | 0.04040800 | 0.04058800 | 0.04053600 |
| 0.04238700 | 0.04165900 | 0.04153300 | 0.04226100 | 0.04315300 | 0.04325900 | 0.04216500 | 0.04072700 | 0.04054100 | 0.04175500 | 0.04306800 | 0.04372000 | 0.04387800 | 0.04393600 |
| 0.05132800 | 0.05049700 | 0.05044900 | 0.05135400 | 0.05237900 | 0.05253600 | 0.05142400 | 0.04990700 | 0.04964900 | 0.05083000 | 0.05211900 | 0.05279900 | 0.05303700 | 0.05312700 |

| 7129       | 7131       | 7133       | 7135       | 7137       | 7139       | 7141       | 7142       | 7144       | 7146       | 7148       | 7150       | 7152       | 7154       |
|------------|------------|------------|------------|------------|------------|------------|------------|------------|------------|------------|------------|------------|------------|
| 0.07209800 | 0.07202100 | 0.07175500 | 0.07136400 | 0.07102400 | 0.07084500 | 0.07084700 | 0.07094100 | 0.07097100 | 0.07087500 | 0.07070500 | 0.07049500 | 0.07024300 | 0.06999600 |
| 0.06314600 | 0.06308700 | 0.06290600 | 0.06262100 | 0.06222500 | 0.06180400 | 0.06154200 | 0.06143300 | 0.06137700 | 0.06136400 | 0.06135200 | 0.06127000 | 0.06114100 | 0.06099900 |
| 0.08177200 | 0.08120100 | 0.08022200 | 0.07898200 | 0.07766400 | 0.07683200 | 0.07686800 | 0.07744600 | 0.07830600 | 0.07929300 | 0.07997000 | 0.08015400 | 0.08000700 | 0.07951200 |
| 0.07696700 | 0.07646900 | 0.07551200 | 0.07425300 | 0.07294100 | 0.07215300 | 0.07225800 | 0.07290000 | 0.07380600 | 0.07482700 | 0.07550300 | 0.07564100 | 0.07547800 | 0.07504600 |
| 0.05286900 | 0.05237500 | 0.05150800 | 0.05036700 | 0.04908800 | 0.04824000 | 0.04826900 | 0.04885400 | 0.04972100 | 0.05076200 | 0.05151900 | 0.05174000 | 0.05161200 | 0.05117400 |
| 0.07571100 | 0.07523300 | 0.07423100 | 0.07289000 | 0.07152800 | 0.07077900 | 0.07097100 | 0.07163200 | 0.07252300 | 0.07362100 | 0.07437300 | 0.07439400 | 0.07399900 | 0.07345600 |
| 0.07702400 | 0.07642700 | 0.07542600 | 0.07420500 | 0.07295800 | 0.07216100 | 0.07216900 | 0.07271300 | 0.07352900 | 0.07443700 | 0.07504800 | 0.07521800 | 0.07509900 | 0.07465300 |
| 0.06292500 | 0.06251700 | 0.06163700 | 0.06039100 | 0.05910400 | 0.05839700 | 0.05858700 | 0.05926800 | 0.06014100 | 0.06109600 | 0.06174600 | 0.06187400 | 0.06164900 | 0.06111700 |
| 0.06722400 | 0.06680300 | 0.06591100 | 0.06469500 | 0.06343500 | 0.06263500 | 0.06256900 | 0.06298200 | 0.06378500 | 0.06489100 | 0.06573200 | 0.06596600 | 0.06581000 | 0.06540300 |
| 0.06771200 | 0.06724400 | 0.06632600 | 0.06516200 | 0.06401800 | 0.06338800 | 0.06348800 | 0.06391800 | 0.06456900 | 0.06549500 | 0.06622500 | 0.06638200 | 0.06610900 | 0.06552800 |
| 0.07846700 | 0.07794700 | 0.07694100 | 0.07566100 | 0.07438500 | 0.07365800 | 0.07373900 | 0.07419800 | 0.07485700 | 0.07576800 | 0.07654200 | 0.07685000 | 0.07676000 | 0.07629400 |
| 0.06716600 | 0.06664500 | 0.06561400 | 0.06432800 | 0.06308200 | 0.06235100 | 0.06244000 | 0.06301100 | 0.06386100 | 0.06493600 | 0.06570800 | 0.06584100 | 0.06559000 | 0.06510200 |
| 0.06308700 | 0.06262600 | 0.06157500 | 0.06022800 | 0.05891300 | 0.05812100 | 0.05811900 | 0.05857000 | 0.05932100 | 0.06032500 | 0.06106600 | 0.06123400 | 0.06105200 | 0.06061700 |
| 0.04027300 | 0.03972200 | 0.03891900 | 0.03793600 | 0.03685500 | 0.03614400 | 0.03618800 | 0.03672000 | 0.03756100 | 0.03862200 | 0.03942500 | 0.03970000 | 0.03962600 | 0.03921200 |
| 0.04390700 | 0.04346900 | 0.04253900 | 0.04134700 | 0.04020500 | 0.03957200 | 0.03961800 | 0.04001300 | 0.04070200 | 0.04170700 | 0.04255900 | 0.04288200 | 0.04274400 | 0.04227300 |
| 0.05308300 | 0.05265100 | 0.05174200 | 0.05052800 | 0.04926800 | 0.04851100 | 0.04857900 | 0.04908700 | 0.04985300 | 0.05091100 | 0.05179800 | 0.05208700 | 0.05185900 | 0.05124700 |

| 7156       | 7158       | 7160       | 7162       | 7164       | 7166       | 7168       | 7169       | 7171       | 7173       | 7175       | 7177       | 7179       | 7181       |
|------------|------------|------------|------------|------------|------------|------------|------------|------------|------------|------------|------------|------------|------------|
| 0.06976000 | 0.06949700 | 0.06932000 | 0.06928300 | 0.06917200 | 0.06892900 | 0.06880000 | 0.06890500 | 0.06912000 | 0.06932500 | 0.06941800 | 0.06930900 | 0.06907100 | 0.06894900 |
| 0.06076700 | 0.06038600 | 0.06004600 | 0.05992600 | 0.05987900 | 0.05981500 | 0.05993300 | 0.06026100 | 0.06051100 | 0.06052900 | 0.06041000 | 0.06021200 | 0.05994800 | 0.05981100 |
| 0.07839900 | 0.07680000 | 0.07567200 | 0.07555600 | 0.07563600 | 0.07545500 | 0.07576300 | 0.07685700 | 0.07800100 | 0.07865500 | 0.07858300 | 0.07740600 | 0.07559500 | 0.07499700 |
| 0.07401300 | 0.07240500 | 0.07116300 | 0.07089700 | 0.07084600 | 0.07064100 | 0.07109300 | 0.07235900 | 0.07351400 | 0.07405300 | 0.07391800 | 0.07282200 | 0.07116000 | 0.07065000 |
| 0.05017000 | 0.04870100 | 0.04768000 | 0.04757600 | 0.04753400 | 0.04719800 | 0.04748100 | 0.04870500 | 0.05000400 | 0.05075600 | 0.05073700 | 0.04953200 | 0.04753700 | 0.04669000 |
| 0.07243000 | 0.07080600 | 0.06959800 | 0.06956200 | 0.06978400 | 0.06961000 | 0.06983900 | 0.07094400 | 0.07217800 | 0.07283500 | 0.07264600 | 0.07137900 | 0.06959700 | 0.06906700 |
| 0.07357600 | 0.07194200 | 0.07072200 | 0.07054200 | 0.07059300 | 0.07040000 | 0.07075500 | 0.07197200 | 0.07324800 | 0.07396500 | 0.07388900 | 0.07270500 | 0.07089800 | 0.07027800 |
| 0.05997400 | 0.05828500 | 0.05709700 | 0.05704800 | 0.05724600 | 0.05715500 | 0.05753700 | 0.05870000 | 0.05986400 | 0.06045000 | 0.06028500 | 0.05909400 | 0.05734700 | 0.05674500 |
| 0.06445100 | 0.06291900 | 0.06172800 | 0.06152200 | 0.06151500 | 0.06124200 | 0.06151400 | 0.06265800 | 0.06387000 | 0.06457800 | 0.06458500 | 0.06350100 | 0.06169800 | 0.06097400 |
| 0.06442700 | 0.06284800 | 0.06172600 | 0.06168600 | 0.06188600 | 0.06178800 | 0.06216600 | 0.06335300 | 0.06453100 | 0.06510200 | 0.06492300 | 0.06374600 | 0.06203300 | 0.06151400 |
| 0.07522400 | 0.07366200 | 0.07255400 | 0.07239900 | 0.07234100 | 0.07203900 | 0.07240800 | 0.07369200 | 0.07494600 | 0.07555500 | 0.07540600 | 0.07424700 | 0.07252600 | 0.07198200 |
| 0.06408700 | 0.06252300 | 0.06134100 | 0.06119600 | 0.06125900 | 0.06100700 | 0.06127900 | 0.06247000 | 0.06377800 | 0.06454000 | 0.06446400 | 0.06322700 | 0.06141200 | 0.06086400 |
| 0.05963800 | 0.05816500 | 0.05711500 | 0.05698800 | 0.05693900 | 0.05662600 | 0.05695700 | 0.05818000 | 0.05937800 | 0.05994400 | 0.05971800 | 0.05844700 | 0.05669500 | 0.05625100 |
| 0.03814600 | 0.03652000 | 0.03530300 | 0.03506900 | 0.03501500 | 0.03477700 | 0.03524000 | 0.03663700 | 0.03795900 | 0.03855600 | 0.03833000 | 0.03703600 | 0.03514200 | 0.03448100 |
| 0.04133000 | 0.03993800 | 0.03891100 | 0.03879500 | 0.03879600 | 0.03850500 | 0.03878400 | 0.03993600 | 0.04104400 | 0.04149400 | 0.04119600 | 0.03991800 | 0.03815200 | 0.03768100 |
| 0.05011600 | 0.04861600 | 0.04765500 | 0.04763100 | 0.04759400 | 0.04720800 | 0.04751200 | 0.04885100 | 0.05022600 | 0.05090200 | 0.05071700 | 0.04944800 | 0.04758600 | 0.04691000 |

| 7183       | 7185       | 7187       | 7189       | 7191       | 7193       | 7195       | 7196       | 7198       | 7200       | 7202       | 7204       | 7206       | 7208       |
|------------|------------|------------|------------|------------|------------|------------|------------|------------|------------|------------|------------|------------|------------|
| 0.06903200 | 0.06908300 | 0.06890000 | 0.06855800 | 0.06817000 | 0.06771500 | 0.06723000 | 0.06682200 | 0.06646700 | 0.06609000 | 0.06575300 | 0.06559100 | 0.06560500 | 0.06567700 |
| 0.05991500 | 0.06001900 | 0.05989200 | 0.05956400 | 0.05916500 | 0.05875900 | 0.05837000 | 0.05801600 | 0.05766000 | 0.05721900 | 0.05675800 | 0.05653000 | 0.05658600 | 0.05668600 |
| 0.07626800 | 0.07775400 | 0.07820600 | 0.07783900 | 0.07721100 | 0.07665800 | 0.07640200 | 0.07623200 | 0.07546900 | 0.07382700 | 0.07226200 | 0.07221200 | 0.07347100 | 0.07450600 |
| 0.07192500 | 0.07341300 | 0.07392600 | 0.07361500 | 0.07295500 | 0.07231600 | 0.07198400 | 0.07174600 | 0.07091900 | 0.06923700 | 0.06766300 | 0.06763000 | 0.06891500 | 0.06999200 |
| 0.04786400 | 0.04946400 | 0.05015100 | 0.05003000 | 0.04958300 | 0.04914200 | 0.04899200 | 0.04896700 | 0.04834500 | 0.04675200 | 0.04511300 | 0.04499500 | 0.04631600 | 0.04748200 |
| 0.07032500 | 0.07170700 | 0.07208800 | 0.07179500 | 0.07136000 | 0.07097700 | 0.07073600 | 0.07043500 | 0.06954700 | 0.06791400 | 0.06649300 | 0.06664300 | 0.06804200 | 0.06905500 |
| 0.07154300 | 0.07310800 | 0.07371700 | 0.07349100 | 0.07283500 | 0.07201800 | 0.07141000 | 0.07103400 | 0.07029700 | 0.06881100 | 0.06738500 | 0.06744200 | 0.06881000 | 0.06988200 |
| 0.05785600 | 0.05918100 | 0.05969800 | 0.05961000 | 0.05926100 | 0.05888800 | 0.05872200 | 0.05850000 | 0.05755300 | 0.05575600 | 0.05417100 | 0.05419800 | 0.05557000 | 0.05668900 |
| 0.06211300 | 0.06360500 | 0.06422000 | 0.06406200 | 0.06352000 | 0.06286000 | 0.06241800 | 0.06211900 | 0.06133400 | 0.05977300 | 0.05832400 | 0.05836800 | 0.05971500 | 0.06080800 |
| 0.06279600 | 0.06429100 | 0.06479500 | 0.06450200 | 0.06392000 | 0.06333700 | 0.06298800 | 0.06273100 | 0.06192800 | 0.06029000 | 0.05874700 | 0.05874800 | 0.06013500 | 0.06131100 |
| 0.07324300 | 0.07468400 | 0.07511700 | 0.07485900 | 0.07443200 | 0.07396500 | 0.07357300 | 0.07313600 | 0.07213600 | 0.07045300 | 0.06906800 | 0.06922800 | 0.07055600 | 0.07153900 |
| 0.06211700 | 0.06350600 | 0.06393400 | 0.06369200 | 0.06322900 | 0.06273100 | 0.06239800 | 0.06212300 | 0.06130100 | 0.05962300 | 0.05802000 | 0.05800500 | 0.05938400 | 0.06046000 |
| 0.05761400 | 0.05911700 | 0.05963700 | 0.05943900 | 0.05898700 | 0.05845900 | 0.05802400 | 0.05763400 | 0.05679800 | 0.05522800 | 0.05375200 | 0.05375800 | 0.05510000 | 0.05625400 |
| 0.03576500 | 0.03735500 | 0.03793300 | 0.03766600 | 0.03712900 | 0.03665700 | 0.03648700 | 0.03646400 | 0.03588800 | 0.03440500 | 0.03295600 | 0.03301000 | 0.03439800 | 0.03555700 |
| 0.03905000 | 0.04059000 | 0.04116300 | 0.04103000 | 0.04063200 | 0.04017100 | 0.03988200 | 0.03969200 | 0.03901200 | 0.03754400 | 0.03616700 | 0.03624000 | 0.03754300 | 0.03858300 |
| 0.04808900 | 0.04958400 | 0.05023100 | 0.05017400 | 0.04975600 | 0.04920100 | 0.04885400 | 0.04863900 | 0.04786100 | 0.04625000 | 0.04483100 | 0.04497700 | 0.04631000 | 0.04728000 |

| 7210       | 7212       | 7214       | 7216       | 7218       | 7220       | 7222       | 7223       | 7225       | 7227       | 7229       | 7231       | 7233       | 7235       |
|------------|------------|------------|------------|------------|------------|------------|------------|------------|------------|------------|------------|------------|------------|
| 0.06572000 | 0.06570900 | 0.06563500 | 0.06549200 | 0.06534600 | 0.06532300 | 0.06537700 | 0.06532700 | 0.06508200 | 0.06453600 | 0.06359500 | 0.06264800 | 0.06228500 | 0.06227500 |
| 0.05669200 | 0.05666200 | 0.05666500 | 0.05666300 | 0.05661500 | 0.05657300 | 0.05650500 | 0.05626800 | 0.05582700 | 0.05518400 | 0.05431200 | 0.05351400 | 0.05321600 | 0.05318300 |
| 0.07463000 | 0.07427200 | 0.07385200 | 0.07329500 | 0.07277600 | 0.07279900 | 0.07304500 | 0.07275800 | 0.07185100 | 0.07015200 | 0.06762700 | 0.06620700 | 0.06751400 | 0.06948300 |
| 0.07022300 | 0.07001400 | 0.06965100 | 0.06897500 | 0.06824200 | 0.06813500 | 0.06838800 | 0.06815100 | 0.06729100 | 0.06560900 | 0.06300700 | 0.06147400 | 0.06276800 | 0.06481200 |
| 0.04769300 | 0.04735000 | 0.04687100 | 0.04617700 | 0.04550600 | 0.04549800 | 0.04582600 | 0.04559500 | 0.04472000 | 0.04312900 | 0.04074900 | 0.03947600 | 0.04100200 | 0.04321700 |
| 0.06900300 | 0.06841500 | 0.06780900 | 0.06716100 | 0.06665300 | 0.06679700 | 0.06721600 | 0.06703000 | 0.06612800 | 0.06439200 | 0.06178900 | 0.06023500 | 0.06142200 | 0.06337900 |
| 0.06996100 | 0.06959300 | 0.06920800 | 0.06861900 | 0.06799100 | 0.06798700 | 0.06835600 | 0.06819300 | 0.06727400 | 0.06543900 | 0.06273100 | 0.06122400 | 0.06260400 | 0.06464200 |
| 0.05681100 | 0.05637200 | 0.05583400 | 0.05518500 | 0.05469700 | 0.05489400 | 0.05531200 | 0.05506500 | 0.05411300 | 0.05237800 | 0.04981400 | 0.04836100 | 0.04970800 | 0.05173900 |
| 0.06091400 | 0.06050000 | 0.06003500 | 0.05944300 | 0.05889300 | 0.05894800 | 0.05930800 | 0.05912500 | 0.05821800 | 0.05641300 | 0.05374100 | 0.05224200 | 0.05356800 | 0.05554800 |
| 0.06147800 | 0.06107600 | 0.06059500 | 0.05997900 | 0.05940300 | 0.05943500 | 0.05979400 | 0.05965600 | 0.05886100 | 0.05718300 | 0.05448500 | 0.05278600 | 0.05402600 | 0.05618400 |
| 0.07156300 | 0.07109600 | 0.07057300 | 0.06995400 | 0.06948800 | 0.06973700 | 0.07026200 | 0.07011100 | 0.06915000 | 0.06729700 | 0.06461200 | 0.06310600 | 0.06443400 | 0.06645900 |
| 0.06047800 | 0.06000700 | 0.05953200 | 0.05891500 | 0.05837400 | 0.05855000 | 0.05904300 | 0.05886100 | 0.05786400 | 0.05603700 | 0.05345500 | 0.05205400 | 0.05342900 | 0.05547500 |
| 0.05646600 | 0.05611500 | 0.05557900 | 0.05481900 | 0.05417800 | 0.05428200 | 0.05469800 | 0.05451700 | 0.05366400 | 0.05197600 | 0.04933400 | 0.04777400 | 0.04915200 | 0.05129400 |
| 0.03571400 | 0.03522500 | 0.03453100 | 0.03370200 | 0.03305900 | 0.03312900 | 0.03351500 | 0.03338700 | 0.03266600 | 0.03119400 | 0.02888400 | 0.02764400 | 0.02913700 | 0.03132000 |
| 0.03868400 | 0.03824000 | 0.03762600 | 0.03684800 | 0.03625400 | 0.03638700 | 0.03677900 | 0.03658200 | 0.03576900 | 0.03424300 | 0.03194300 | 0.03071600 | 0.03215400 | 0.03423000 |
| 0.04735800 | 0.04706800 | 0.04674000 | 0.04615600 | 0.04550100 | 0.04550300 | 0.04594300 | 0.04583400 | 0.04491100 | 0.04312300 | 0.04057200 | 0.03921200 | 0.04069200 | 0.04292500 |



| 7237       | 7239       | 7241       | 7243       | 7245       | 7247       | 7249       | 7250       | 7252       | 7254       | 7256       | 7258       | 7260       | 7262       |
|------------|------------|------------|------------|------------|------------|------------|------------|------------|------------|------------|------------|------------|------------|
| 0.06203600 | 0.06138300 | 0.06057200 | 0.06011800 | 0.06014700 | 0.06025800 | 0.06011500 | 0.05974600 | 0.05947500 | 0.05949100 | 0.05958600 | 0.05952900 | 0.05934100 | 0.05918000 |
| 0.05291000 | 0.05225000 | 0.05152300 | 0.05123500 | 0.05133100 | 0.05133700 | 0.05108000 | 0.05075800 | 0.05063000 | 0.05070800 | 0.05075000 | 0.05059700 | 0.05035400 | 0.05021000 |
| 0.06952000 | 0.06730800 | 0.06493600 | 0.06506000 | 0.06717000 | 0.06871300 | 0.06852800 | 0.06735500 | 0.06688600 | 0.06768800 | 0.06849400 | 0.06829400 | 0.06763800 | 0.06753500 |
| 0.06493100 | 0.06275900 | 0.06040200 | 0.06062000 | 0.06286900 | 0.06445500 | 0.06428500 | 0.06322500 | 0.06284200 | 0.06352300 | 0.06405300 | 0.06358900 | 0.06276900 | 0.06262700 |
| 0.04341500 | 0.04130400 | 0.03909900 | 0.03952400 | 0.04192100 | 0.04357800 | 0.04343200 | 0.04237300 | 0.04202000 | 0.04284700 | 0.04362200 | 0.04331700 | 0.04246100 | 0.04219400 |
| 0.06349500 | 0.06133600 | 0.05897000 | 0.05920000 | 0.06150200 | 0.06313900 | 0.06296600 | 0.06186100 | 0.06150100 | 0.06233700 | 0.06306900 | 0.06272100 | 0.06189500 | 0.06171500 |
| 0.06464900 | 0.06238500 | 0.06003400 | 0.06029500 | 0.06256800 | 0.06415600 | 0.06394400 | 0.06284500 | 0.06250100 | 0.06327000 | 0.06390100 | 0.06352300 | 0.06275100 | 0.06265300 |
| 0.05179500 | 0.04963200 | 0.04744100 | 0.04781800 | 0.05006300 | 0.05159700 | 0.05143900 | 0.05044400 | 0.05015100 | 0.05091100 | 0.05152000 | 0.05118400 | 0.05052400 | 0.05046800 |
| 0.05556200 | 0.05335000 | 0.05103800 | 0.05131600 | 0.05360100 | 0.05519400 | 0.05494200 | 0.05369600 | 0.05319700 | 0.05402900 | 0.05488400 | 0.05462900 | 0.05379900 | 0.05357100 |
| 0.05648700 | 0.05452200 | 0.05231900 | 0.05253900 | 0.05472600 | 0.05631100 | 0.05613300 | 0.05494300 | 0.05437500 | 0.05501000 | 0.05569600 | 0.05544200 | 0.05474800 | 0.05468000 |
| 0.06652100 | 0.06431200 | 0.06196000 | 0.06213700 | 0.06430000 | 0.06589600 | 0.06580700 | 0.06472000 | 0.06420000 | 0.06482500 | 0.06543600 | 0.06506900 | 0.06428300 | 0.06413000 |
| 0.05558600 | 0.05345300 | 0.05121000 | 0.05153200 | 0.05377300 | 0.05525500 | 0.05493400 | 0.05369200 | 0.05316000 | 0.05383600 | 0.05453000 | 0.05428000 | 0.05360700 | 0.05352300 |
| 0.05137200 | 0.04909700 | 0.04674900 | 0.04706800 | 0.04939600 | 0.05101300 | 0.05081900 | 0.04969900 | 0.04928500 | 0.05002100 | 0.05072700 | 0.05050000 | 0.04981500 | 0.04962700 |
| 0.03160500 | 0.02963900 | 0.02745800 | 0.02778700 | 0.03017100 | 0.03193300 | 0.03183200 | 0.03066800 | 0.03018800 | 0.03096300 | 0.03172300 | 0.03148600 | 0.03083900 | 0.03078600 |
| 0.03438200 | 0.03236700 | 0.03034400 | 0.03086400 | 0.03319800 | 0.03474900 | 0.03454200 | 0.03349600 | 0.03320400 | 0.03401600 | 0.03470000 | 0.03440200 | 0.03371500 | 0.03362800 |
| 0.04322800 | 0.04122100 | 0.03899900 | 0.03930100 | 0.04161000 | 0.04323400 | 0.04300000 | 0.04175700 | 0.04123000 | 0.04196900 | 0.04273600 | 0.04254300 | 0.04193700 | 0.04191300 |

| 7264       | 7266       | 7268       | 7270       | 7272       | 7274       | 7276       | 7277       | 7279       | 7281       | 7283       | 7285       | 7287       | 7289       |
|------------|------------|------------|------------|------------|------------|------------|------------|------------|------------|------------|------------|------------|------------|
| 0.05910400 | 0.05905900 | 0.05905200 | 0.05912200 | 0.05920400 | 0.05925400 | 0.05936200 | 0.05956700 | 0.05977100 | 0.05989700 | 0.05997600 | 0.06010900 | 0.06039600 | 0.06077300 |
| 0.05016400 | 0.05014400 | 0.05021500 | 0.05038400 | 0.05048000 | 0.05042800 | 0.05038700 | 0.05051300 | 0.05077900 | 0.05104100 | 0.05121200 | 0.05135200 | 0.05159500 | 0.05192500 |
| 0.06793200 | 0.06820100 | 0.06820500 | 0.06803300 | 0.06782600 | 0.06791300 | 0.06831000 | 0.06863600 | 0.06874400 | 0.06878800 | 0.06869600 | 0.06841300 | 0.06828000 | 0.06825400 |
| 0.06312000 | 0.06359200 | 0.06376500 | 0.06364600 | 0.06347400 | 0.06362600 | 0.06400700 | 0.06424500 | 0.06437000 | 0.06453100 | 0.06448700 | 0.06413900 | 0.06393400 | 0.06391800 |
| 0.04260900 | 0.04308800 | 0.04339200 | 0.04343800 | 0.04323200 | 0.04313000 | 0.04331000 | 0.04353300 | 0.04368300 | 0.04376800 | 0.04354500 | 0.04297500 | 0.04259600 | 0.04247600 |
| 0.06220100 | 0.06262100 | 0.06266000 | 0.06239700 | 0.06211200 | 0.06217200 | 0.06252300 | 0.06281700 | 0.06302600 | 0.06323800 | 0.06321700 | 0.06290000 | 0.06274300 | 0.06273800 |
| 0.06322000 | 0.06373800 | 0.06388200 | 0.06366600 | 0.06334900 | 0.06336900 | 0.06372500 | 0.06407700 | 0.06433700 | 0.06449000 | 0.06429200 | 0.06378200 | 0.06349800 | 0.06346100 |
| 0.05089400 | 0.05116800 | 0.05117100 | 0.05103800 | 0.05092900 | 0.05112400 | 0.05158800 | 0.05191700 | 0.05196200 | 0.05185700 | 0.05152900 | 0.05102000 | 0.05080500 | 0.05083100 |
| 0.05401000 | 0.05444600 | 0.05463800 | 0.05458500 | 0.05440200 | 0.05444400 | 0.05476000 | 0.05501400 | 0.05509100 | 0.05510900 | 0.05499400 | 0.05476700 | 0.05476100 | 0.05483700 |
| 0.05524000 | 0.05569800 | 0.05577600 | 0.05555300 | 0.05527500 | 0.05535400 | 0.05576900 | 0.05607300 | 0.05612400 | 0.05606300 | 0.05583600 | 0.05548100 | 0.05536800 | 0.05539500 |
| 0.06461800 | 0.06510800 | 0.06534200 | 0.06530200 | 0.06514300 | 0.06523200 | 0.06558400 | 0.06584500 | 0.06589400 | 0.06583400 | 0.06558900 | 0.06520400 | 0.06509600 | 0.06518500 |
| 0.05400500 | 0.05440000 | 0.05448400 | 0.05434100 | 0.05420500 | 0.05439200 | 0.05480600 | 0.05510500 | 0.05521900 | 0.05518700 | 0.05488000 | 0.05444400 | 0.05439700 | 0.05461400 |
| 0.04999500 | 0.05035400 | 0.05044300 | 0.05028300 | 0.05011800 | 0.05031800 | 0.05079100 | 0.05109100 | 0.05114600 | 0.05115500 | 0.05101600 | 0.05065600 | 0.05045000 | 0.05038500 |
| 0.03124900 | 0.03160700 | 0.03168900 | 0.03152900 | 0.03128300 | 0.03133000 | 0.03165800 | 0.03182700 | 0.03173800 | 0.03161900 | 0.03140800 | 0.03101700 | 0.03078500 | 0.03067900 |
| 0.03409000 | 0.03445800 | 0.03456400 | 0.03449600 | 0.03435300 | 0.03435200 | 0.03452200 | 0.03464200 | 0.03465200 | 0.03460100 | 0.03433900 | 0.03390600 | 0.03372200 | 0.03365600 |
| 0.04239100 | 0.04271900 | 0.04273600 | 0.04255900 | 0.04238100 | 0.04250300 | 0.04288300 | 0.04314100 | 0.04314100 | 0.04300300 | 0.04267200 | 0.04218800 | 0.04199200 | 0.04204900 |

| 7291       | 7293       | 7295       | 7297       | 7299       | 7301       | 7303       | 7304       | 7306       | 7308       | 7310       | 7312       | 7314       | 7316       |
|------------|------------|------------|------------|------------|------------|------------|------------|------------|------------|------------|------------|------------|------------|
| 0.06110400 | 0.06151000 | 0.06216600 | 0.06292400 | 0.06361700 | 0.06429300 | 0.06495400 | 0.06551300 | 0.06595700 | 0.06630700 | 0.06660900 | 0.06689700 | 0.06701700 | 0.06673800 |
| 0.05225400 | 0.05270100 | 0.05337100 | 0.05412100 | 0.05488800 | 0.05568400 | 0.05635100 | 0.05682600 | 0.05727900 | 0.05773400 | 0.05804400 | 0.05820300 | 0.05820600 | 0.05785600 |
| 0.06803400 | 0.06821900 | 0.06922300 | 0.07033500 | 0.07141600 | 0.07266400 | 0.07325800 | 0.07277800 | 0.07216600 | 0.07221700 | 0.07293800 | 0.07405500 | 0.07502300 | 0.07536100 |
| 0.06373500 | 0.06387700 | 0.06482700 | 0.06599500 | 0.06712600 | 0.06826700 | 0.06870600 | 0.06820000 | 0.06769500 | 0.06783300 | 0.06851900 | 0.06959800 | 0.07063400 | 0.07103800 |
| 0.04218600 | 0.04220400 | 0.04300500 | 0.04392200 | 0.04472500 | 0.04560500 | 0.04587100 | 0.04514600 | 0.04430500 | 0.04411100 | 0.04459900 | 0.04557000 | 0.04654100 | 0.04704100 |
| 0.06249000 | 0.06254400 | 0.06344100 | 0.06454000 | 0.06556000 | 0.06662800 | 0.06706700 | 0.06657800 | 0.06605900 | 0.06615200 | 0.06680600 | 0.06786900 | 0.06887500 | 0.06929600 |
| 0.06331500 | 0.06357600 | 0.06459200 | 0.06566400 | 0.06670100 | 0.06788700 | 0.06839300 | 0.06785400 | 0.06723800 | 0.06728400 | 0.06798500 | 0.06915200 | 0.07024900 | 0.07065300 |
| 0.05063800 | 0.05074500 | 0.05166200 | 0.05276400 | 0.05382000 | 0.05490800 | 0.05527900 | 0.05466900 | 0.05402100 | 0.05399500 | 0.05453100 | 0.05547200 | 0.05641400 | 0.05686400 |
| 0.05460900 | 0.05467600 | 0.05556600 | 0.05668600 | 0.05782100 | 0.05898600 | 0.05940600 | 0.05890100 | 0.05847800 | 0.05869600 | 0.05936500 | 0.06034200 | 0.06129400 | 0.06169700 |
| 0.05518700 | 0.05528500 | 0.05617400 | 0.05727100 | 0.05836200 | 0.05949800 | 0.05990000 | 0.05926200 | 0.05854700 | 0.05849000 | 0.05911200 | 0.06027500 | 0.06145000 | 0.06199500 |
| 0.06505000 | 0.06524600 | 0.06630100 | 0.06756900 | 0.06872300 | 0.06978700 | 0.07013700 | 0.06965200 | 0.06925600 | 0.06950600 | 0.07025500 | 0.07121400 | 0.07196700 | 0.07221200 |
| 0.05455700 | 0.05468800 | 0.05552400 | 0.05652500 | 0.05754100 | 0.05867000 | 0.05910900 | 0.05852800 | 0.05795000 | 0.05816000 | 0.05902800 | 0.06020900 | 0.06117600 | 0.06142800 |
| 0.05014100 | 0.05030300 | 0.05131100 | 0.05242700 | 0.05339400 | 0.05438100 | 0.05476500 | 0.05429900 | 0.05382900 | 0.05392700 | 0.05451300 | 0.05543500 | 0.05629800 | 0.05662800 |
| 0.03033000 | 0.03024800 | 0.03092000 | 0.03177700 | 0.03260700 | 0.03344500 | 0.03352000 | 0.03257500 | 0.03163400 | 0.03147500 | 0.03201000 | 0.03295300 | 0.03392300 | 0.03453700 |
| 0.03330500 | 0.03326400 | 0.03400900 | 0.03488800 | 0.03570700 | 0.03656800 | 0.03672000 | 0.03589800 | 0.03509400 | 0.03502100 | 0.03560200 | 0.03660300 | 0.03756800 | 0.03807200 |
| 0.04190300 | 0.04198100 | 0.04274900 | 0.04365000 | 0.04453500 | 0.04553000 | 0.04586700 | 0.04516700 | 0.04432300 | 0.04412900 | 0.04468400 | 0.04579700 | 0.04689500 | 0.04742800 |

| 7318       | 7320       | 7322       | 7324       | 7326       | 7328       | 7330       | 7331       | 7333       | 7335       | 7337       | 7339       | 7341       | 7343       |
|------------|------------|------------|------------|------------|------------|------------|------------|------------|------------|------------|------------|------------|------------|
| 0.06601600 | 0.06497100 | 0.06374600 | 0.06243900 | 0.06116000 | 0.06019500 | 0.05974200 | 0.05956400 | 0.05930700 | 0.05880500 | 0.05805900 | 0.05715800 | 0.05618300 | 0.05519500 |
| 0.05698000 | 0.05564700 | 0.05414200 | 0.05274100 | 0.05162100 | 0.05098400 | 0.05082200 | 0.05081300 | 0.05068500 | 0.05023000 | 0.04927600 | 0.04798900 | 0.04681700 | 0.04590300 |
| 0.07470600 | 0.07282900 | 0.07021900 | 0.06773700 | 0.06604000 | 0.06587500 | 0.06710500 | 0.06829400 | 0.06830000 | 0.06673800 | 0.06388100 | 0.06116500 | 0.06004600 | 0.06002800 |
| 0.07041700 | 0.06865600 | 0.06617400 | 0.06364400 | 0.06177400 | 0.06150500 | 0.06273600 | 0.06399000 | 0.06409900 | 0.06257500 | 0.05961600 | 0.05672000 | 0.05544800 | 0.05535300 |
| 0.04670300 | 0.04524300 | 0.04307400 | 0.04103700 | 0.03979800 | 0.04007200 | 0.04168400 | 0.04320500 | 0.04345000 | 0.04197700 | 0.03917400 | 0.03664300 | 0.03581700 | 0.03615500 |
| 0.06875000 | 0.06698400 | 0.06441100 | 0.06186500 | 0.06004500 | 0.05977900 | 0.06104100 | 0.06243000 | 0.06267400 | 0.06118800 | 0.05822300 | 0.05540900 | 0.05433100 | 0.05443000 |
| 0.06997900 | 0.06813600 | 0.06559700 | 0.06309700 | 0.06136000 | 0.06130100 | 0.06275600 | 0.06413400 | 0.06415800 | 0.06238500 | 0.05921200 | 0.05627800 | 0.05506400 | 0.05499700 |
| 0.05641800 | 0.05486500 | 0.05261100 | 0.05036100 | 0.04878800 | 0.04871900 | 0.05001700 | 0.05128400 | 0.05138100 | 0.04984800 | 0.04698400 | 0.04432000 | 0.04331900 | 0.04344900 |
| 0.06106900 | 0.05922900 | 0.05673000 | 0.05434900 | 0.05263300 | 0.05233600 | 0.05348700 | 0.05479300 | 0.05495100 | 0.05329400 | 0.05012300 | 0.04712900 | 0.04590400 | 0.04593600 |
| 0.06152000 | 0.05991600 | 0.05759900 | 0.05518800 | 0.05332300 | 0.05298100 | 0.05417500 | 0.05545700 | 0.05558700 | 0.05404400 | 0.05112200 | 0.04845700 | 0.04756900 | 0.04780300 |
| 0.07164900 | 0.06994800 | 0.06748500 | 0.06511100 | 0.06347800 | 0.06322000 | 0.06421500 | 0.06526400 | 0.06530900 | 0.06382000 | 0.06102300 | 0.05839300 | 0.05731700 | 0.05726600 |
| 0.06065400 | 0.05879800 | 0.05640300 | 0.05414000 | 0.05244100 | 0.05207200 | 0.05314900 | 0.05437600 | 0.05448100 | 0.05293000 | 0.05004100 | 0.04736200 | 0.04629600 | 0.04622800 |
| 0.05602000 | 0.05427300 | 0.05186200 | 0.04957600 | 0.04807100 | 0.04808400 | 0.04941700 | 0.05068400 | 0.05080300 | 0.04932400 | 0.04653000 | 0.04393100 | 0.04290100 | 0.04284900 |
| 0.03434300 | 0.03303800 | 0.03107900 | 0.02923600 | 0.02809600 | 0.02836600 | 0.02989700 | 0.03135700 | 0.03165000 | 0.03031400 | 0.02768200 | 0.02533800 | 0.02467700 | 0.02508500 |
| 0.03779600 | 0.03649300 | 0.03450300 | 0.03254500 | 0.03127500 | 0.03147900 | 0.03301300 | 0.03444700 | 0.03463600 | 0.03318200 | 0.03046000 | 0.02803400 | 0.02728900 | 0.02764700 |
| 0.04706700 | 0.04562900 | 0.04346300 | 0.04121400 | 0.03957200 | 0.03951700 | 0.04098500 | 0.04245600 | 0.04272000 | 0.04134000 | 0.03863100 | 0.03615400 | 0.03535200 | 0.03565900 |

| 7345       | 7347       | 7349       | 7351       | 7353       | 7355       | 7357       | 7358       | 7360       | 7362       | 7364       | 7366       | 7368       | 7370       |
|------------|------------|------------|------------|------------|------------|------------|------------|------------|------------|------------|------------|------------|------------|
| 0.05429600 | 0.05357500 | 0.05302400 | 0.05252500 | 0.05200000 | 0.05156100 | 0.05128000 | 0.05104500 | 0.05081600 | 0.05066900 | 0.05059700 | 0.05057100 | 0.05062000 | 0.05067800 |
| 0.04510300 | 0.04444000 | 0.04401600 | 0.04368600 | 0.04326100 | 0.04281800 | 0.04248500 | 0.04223500 | 0.04205700 | 0.04197400 | 0.04191000 | 0.04182200 | 0.04179000 | 0.04179500 |
| 0.06000300 | 0.06000400 | 0.06026100 | 0.06010300 | 0.05922500 | 0.05860500 | 0.05878000 | 0.05902800 | 0.05900300 | 0.05887400 | 0.05856400 | 0.05829300 | 0.05858100 | 0.05898500 |
| 0.05534800 | 0.05547300 | 0.05588600 | 0.05582400 | 0.05494600 | 0.05427300 | 0.05441100 | 0.05467800 | 0.05470400 | 0.05459000 | 0.05418800 | 0.05375600 | 0.05398700 | 0.05450400 |
| 0.03658200 | 0.03709400 | 0.03783300 | 0.03808400 | 0.03751000 | 0.03706600 | 0.03732100 | 0.03760600 | 0.03758600 | 0.03746000 | 0.03715100 | 0.03680800 | 0.03700200 | 0.03740900 |
| 0.05451300 | 0.05458300 | 0.05486500 | 0.05472000 | 0.05391800 | 0.05345700 | 0.05370300 | 0.05377400 | 0.05345300 | 0.05319300 | 0.05297200 | 0.05285300 | 0.05326100 | 0.05371200 |
| 0.05503100 | 0.05527700 | 0.05584000 | 0.05585000 | 0.05498200 | 0.05432400 | 0.05447200 | 0.05471000 | 0.05467200 | 0.05453000 | 0.05423700 | 0.05400000 | 0.05430500 | 0.05469100 |
| 0.04357500 | 0.04370700 | 0.04410300 | 0.04413400 | 0.04346900 | 0.04297900 | 0.04316100 | 0.04342500 | 0.04348600 | 0.04342500 | 0.04312600 | 0.04283100 | 0.04303500 | 0.04334300 |
| 0.04603500 | 0.04613900 | 0.04645800 | 0.04634400 | 0.04548500 | 0.04487600 | 0.04512200 | 0.04551100 | 0.04560800 | 0.04551400 | 0.04513100 | 0.04471500 | 0.04491300 | 0.04535900 |
| 0.04793800 | 0.04804700 | 0.04843600 | 0.04842200 | 0.04762900 | 0.04703200 | 0.04719500 | 0.04737700 | 0.04724200 | 0.04704000 | 0.04670800 | 0.04641700 | 0.04672400 | 0.04729600 |
| 0.05723000 | 0.05728600 | 0.05758600 | 0.05740600 | 0.05652200 | 0.05597600 | 0.05621000 | 0.05643500 | 0.05635100 | 0.05619900 | 0.05590500 | 0.05566200 | 0.05597900 | 0.05639300 |
| 0.04612700 | 0.04619800 | 0.04664500 | 0.04661900 | 0.04576400 | 0.04509600 | 0.04514300 | 0.04524700 | 0.04519400 | 0.04516900 | 0.04497600 | 0.04476600 | 0.04510400 | 0.04561800 |
| 0.04275900 | 0.04278800 | 0.04318700 | 0.04322300 | 0.04251500 | 0.04201800 | 0.04227100 | 0.04252000 | 0.04239800 | 0.04215900 | 0.04181400 | 0.04155000 | 0.04185700 | 0.04233800 |
| 0.02550800 | 0.02602600 | 0.02674900 | 0.02691900 | 0.02633300 | 0.02605700 | 0.02648800 | 0.02674600 | 0.02656600 | 0.02635600 | 0.02612000 | 0.02594000 | 0.02626000 | 0.02671900 |
| 0.02809300 | 0.02867500 | 0.02941700 | 0.02952500 | 0.02880600 | 0.02833200 | 0.02858200 | 0.02883400 | 0.02885600 | 0.02888800 | 0.02873700 | 0.02847700 | 0.02870600 | 0.02913900 |
| 0.03601200 | 0.03644200 | 0.03705900 | 0.03709800 | 0.03626200 | 0.03565300 | 0.03593000 | 0.03636000 | 0.03648900 | 0.03638800 | 0.03593700 | 0.03540800 | 0.03548200 | 0.03584200 |

| 7372       | 7374       | 7376       | 7378       | 7380       | 7382       | 7384       | 7385       | 7387       | 7389       | 7391       | 7393       | 7395       | 7397       |
|------------|------------|------------|------------|------------|------------|------------|------------|------------|------------|------------|------------|------------|------------|
| 0.05060300 | 0.05039900 | 0.05018700 | 0.05001700 | 0.04991200 | 0.04992900 | 0.05003400 | 0.05014300 | 0.05028200 | 0.05054600 | 0.05091900 | 0.05123600 | 0.05136800 | 0.05136800 |
| 0.04167000 | 0.04140200 | 0.04116000 | 0.04101800 | 0.04099000 | 0.04111500 | 0.04127200 | 0.04133100 | 0.04142200 | 0.04171900 | 0.04214600 | 0.04251100 | 0.04272000 | 0.04275400 |
| 0.05859400 | 0.05773500 | 0.05732000 | 0.05722000 | 0.05717200 | 0.05760300 | 0.05843600 | 0.05900800 | 0.05915700 | 0.05928000 | 0.05965800 | 0.06018100 | 0.06061100 | 0.06086000 |
| 0.05424300 | 0.05339000 | 0.05289300 | 0.05274000 | 0.05275400 | 0.05336500 | 0.05438600 | 0.05502700 | 0.05511300 | 0.05513800 | 0.05549000 | 0.05601500 | 0.05634100 | 0.05641100 |
| 0.03704800 | 0.03612200 | 0.03561400 | 0.03554800 | 0.03571000 | 0.03641900 | 0.03744000 | 0.03805600 | 0.03817200 | 0.03825800 | 0.03852700 | 0.03873700 | 0.03874400 | 0.03873400 |
| 0.05327900 | 0.05236200 | 0.05193200 | 0.05182000 | 0.05179500 | 0.05232900 | 0.05324400 | 0.05380000 | 0.05388900 | 0.05396200 | 0.05425300 | 0.05459000 | 0.05485500 | 0.05516700 |
| 0.05421600 | 0.05319700 | 0.05261800 | 0.05245300 | 0.05250000 | 0.05310700 | 0.05405000 | 0.05464500 | 0.05480900 | 0.05499600 | 0.05544400 | 0.05591900 | 0.05619200 | 0.05632700 |
| 0.04295900 | 0.04221200 | 0.04189600 | 0.04178800 | 0.04167500 | 0.04209000 | 0.04298600 | 0.04365400 | 0.04389300 | 0.04406200 | 0.04437500 | 0.04471100 | 0.04493900 | 0.04510400 |
| 0.04504300 | 0.04415300 | 0.04358400 | 0.04330400 | 0.04319200 | 0.04375000 | 0.04480700 | 0.04553400 | 0.04573100 | 0.04586000 | 0.04620100 | 0.04660800 | 0.04693100 | 0.04714700 |
| 0.04717800 | 0.04648400 | 0.04602400 | 0.04582000 | 0.04575800 | 0.04622500 | 0.04704800 | 0.04756800 | 0.04767500 | 0.04778800 | 0.04816300 | 0.04864400 | 0.04899900 | 0.04920800 |
| 0.05597800 | 0.05507900 | 0.05461300 | 0.05448000 | 0.05448900 | 0.05504000 | 0.05594900 | 0.05653600 | 0.05668200 | 0.05678500 | 0.05713900 | 0.05765100 | 0.05805900 | 0.05826900 |
| 0.04534600 | 0.04446700 | 0.04387400 | 0.04361900 | 0.04359400 | 0.04417300 | 0.04510400 | 0.04564000 | 0.04569800 | 0.04577900 | 0.04616900 | 0.04671200 | 0.04715400 | 0.04738900 |
| 0.04208400 | 0.04135400 | 0.04097000 | 0.04077100 | 0.04059300 | 0.04097900 | 0.04184200 | 0.04245900 | 0.04265700 | 0.04280200 | 0.04309400 | 0.04341900 | 0.04367500 | 0.04388300 |
| 0.02643900 | 0.02568400 | 0.02534200 | 0.02531000 | 0.02536900 | 0.02593900 | 0.02685700 | 0.02741600 | 0.02752300 | 0.02755900 | 0.02771900 | 0.02796500 | 0.02821700 | 0.02841700 |
| 0.02884300 | 0.02804500 | 0.02762500 | 0.02751100 | 0.02752800 | 0.02805200 | 0.02889000 | 0.02944000 | 0.02965300 | 0.02986400 | 0.03020700 | 0.03054000 | 0.03075600 | 0.03090000 |
| 0.03555600 | 0.03489100 | 0.03467100 | 0.03465200 | 0.03458900 | 0.03502200 | 0.03590600 | 0.03653900 | 0.03672000 | 0.03677500 | 0.03696000 | 0.03724900 | 0.03751000 | 0.03768700 |

| 7399       | 7401       | 7403       | 7405       | 7407       | 7409       | 7411       | 7412       | 7414       | 7416       | 7418       | 7420       | 7422       | 7424       |
|------------|------------|------------|------------|------------|------------|------------|------------|------------|------------|------------|------------|------------|------------|
| 0.05133800 | 0.05127000 | 0.05113100 | 0.05101600 | 0.05107800 | 0.05140800 | 0.05196100 | 0.05243700 | 0.05241800 | 0.05170900 | 0.05044400 | 0.04891900 | 0.04745100 | 0.04626600 |
| 0.04261500 | 0.04236000 | 0.04209900 | 0.04199000 | 0.04215400 | 0.04257000 | 0.04308600 | 0.04347700 | 0.04349800 | 0.04295600 | 0.04185000 | 0.04044100 | 0.03901900 | 0.03770800 |
| 0.06092600 | 0.06074900 | 0.06042100 | 0.06029900 | 0.06057900 | 0.06110100 | 0.06163500 | 0.06197400 | 0.06187200 | 0.06119200 | 0.06011000 | 0.05893000 | 0.05774600 | 0.05657300 |
| 0.05636800 | 0.05615100 | 0.05579000 | 0.05569700 | 0.05607100 | 0.05661600 | 0.05708000 | 0.05741500 | 0.05742100 | 0.05682200 | 0.05569100 | 0.05442000 | 0.05323200 | 0.05211200 |
| 0.03881100 | 0.03881200 | 0.03872500 | 0.03883900 | 0.03925700 | 0.03970900 | 0.03993200 | 0.03985300 | 0.03949700 | 0.03894300 | 0.03833300 | 0.03780800 | 0.03736700 | 0.03689100 |
| 0.05544700 | 0.05537900 | 0.05505200 | 0.05497600 | 0.05534700 | 0.05590000 | 0.05637000 | 0.05661100 | 0.05644300 | 0.05572900 | 0.05461300 | 0.05339700 | 0.05222400 | 0.05114600 |
| 0.05634800 | 0.05612200 | 0.05577700 | 0.05575000 | 0.05620000 | 0.05682100 | 0.05729500 | 0.05748400 | 0.05728000 | 0.05662600 | 0.05563900 | 0.05450200 | 0.05327000 | 0.05197900 |
| 0.04520600 | 0.04506100 | 0.04469900 | 0.04457400 | 0.04494500 | 0.04551400 | 0.04593300 | 0.04609600 | 0.04592600 | 0.04534800 | 0.04449600 | 0.04358700 | 0.04264800 | 0.04165600 |
| 0.04714000 | 0.04678900 | 0.04632900 | 0.04628000 | 0.04681200 | 0.04756000 | 0.04813000 | 0.04836000 | 0.04817000 | 0.04749200 | 0.04641400 | 0.04518700 | 0.04397200 | 0.04282100 |
| 0.04929200 | 0.04918300 | 0.04898700 | 0.04899400 | 0.04926700 | 0.04965300 | 0.05004100 | 0.05028000 | 0.05014100 | 0.04952800 | 0.04855100 | 0.04741100 | 0.04627200 | 0.04528400 |
| 0.05832400 | 0.05816100 | 0.05782300 | 0.05767600 | 0.05793600 | 0.05840700 | 0.05883600 | 0.05905300 | 0.05889500 | 0.05827800 | 0.05725000 | 0.05601000 | 0.05479400 | 0.05374800 |
| 0.04741500 | 0.04723200 | 0.04696200 | 0.04691800 | 0.04727500 | 0.04784200 | 0.04832000 | 0.04850500 | 0.04824600 | 0.04746700 | 0.04633100 | 0.04513300 | 0.04398900 | 0.04288700 |
| 0.04399000 | 0.04386400 | 0.04361600 | 0.04358900 | 0.04390200 | 0.04434500 | 0.04470700 | 0.04488700 | 0.04473900 | 0.04413200 | 0.04321800 | 0.04225800 | 0.04128500 | 0.04028700 |
| 0.02847800 | 0.02830600 | 0.02806800 | 0.02812000 | 0.02850400 | 0.02895300 | 0.02924600 | 0.02927800 | 0.02902900 | 0.02854500 | 0.02791900 | 0.02729700 | 0.02676200 | 0.02631900 |
| 0.03093800 | 0.03072400 | 0.03041900 | 0.03045500 | 0.03088100 | 0.03131800 | 0.03153900 | 0.03151200 | 0.03119200 | 0.03064000 | 0.03010600 | 0.02969700 | 0.02922100 | 0.02858200 |
| 0.03776200 | 0.03765100 | 0.03743800 | 0.03745500 | 0.03778300 | 0.03814400 | 0.03833500 | 0.03832200 | 0.03807700 | 0.03762300 | 0.03710200 | 0.03658100 | 0.03590800 | 0.03506700 |

| 7426       | 7428       | 7430       | 7432       | 7434       | 7436       | 7438       | 7439       | 7441       | 7443       | 7445       | 7447       | 7449       | 7451       |
|------------|------------|------------|------------|------------|------------|------------|------------|------------|------------|------------|------------|------------|------------|
| 0.04541100 | 0.04476500 | 0.04422600 | 0.04381900 | 0.04354400 | 0.04331200 | 0.04308100 | 0.04288400 | 0.04273400 | 0.04258300 | 0.04240500 | 0.04224500 | 0.04212300 | 0.04201500 |
| 0.03659900 | 0.03576500 | 0.03516400 | 0.03476100 | 0.03456700 | 0.03448000 | 0.03435800 | 0.03417600 | 0.03393600 | 0.03362200 | 0.03330600 | 0.03307900 | 0.03293900 | 0.03285300 |
| 0.05556100 | 0.05477700 | 0.05414700 | 0.05367400 | 0.05339200 | 0.05322300 | 0.05306900 | 0.05292800 | 0.05280400 | 0.05262700 | 0.05236700 | 0.05211900 | 0.05194100 | 0.05175200 |
| 0.05110000 | 0.05030800 | 0.04979500 | 0.04955800 | 0.04948300 | 0.04938500 | 0.04920100 | 0.04899300 | 0.04875300 | 0.04844800 | 0.04816600 | 0.04799300 | 0.04791200 | 0.04788000 |
| 0.03637800 | 0.03593700 | 0.03561000 | 0.03537500 | 0.03521100 | 0.03508400 | 0.03497300 | 0.03487100 | 0.03474500 | 0.03459900 | 0.03452900 | 0.03459300 | 0.03468800 | 0.03467000 |
| 0.05025200 | 0.04953900 | 0.04896700 | 0.04855400 | 0.04829800 | 0.04813100 | 0.04797500 | 0.04778300 | 0.04756700 | 0.04735600 | 0.04716700 | 0.04700400 | 0.04686600 | 0.04675500 |
| 0.05086100 | 0.05014100 | 0.04974000 | 0.04943500 | 0.04915400 | 0.04895800 | 0.04886600 | 0.04880400 | 0.04864900 | 0.04836700 | 0.04807700 | 0.04790200 | 0.04783400 | 0.04778900 |
| 0.04073900 | 0.04003500 | 0.03957100 | 0.03927900 | 0.03906200 | 0.03886800 | 0.03867500 | 0.03845200 | 0.03819700 | 0.03798700 | 0.03792400 | 0.03799300 | 0.03804400 | 0.03796400 |
| 0.04180800 | 0.04096900 | 0.04032400 | 0.03993100 | 0.03973100 | 0.03956600 | 0.03939300 | 0.03927100 | 0.03916300 | 0.03894900 | 0.03859900 | 0.03823100 | 0.03797300 | 0.03782500 |
| 0.04455400 | 0.04402800 | 0.04356900 | 0.04316900 | 0.04287900 | 0.04264500 | 0.04241200 | 0.04223300 | 0.04213300 | 0.04201200 | 0.04177600 | 0.04149100 | 0.04132800 | 0.04133900 |
| 0.05293800 | 0.05234800 | 0.05192300 | 0.05163600 | 0.05142900 | 0.05118500 | 0.05088200 | 0.05062400 | 0.05044000 | 0.05022400 | 0.04994900 | 0.04972100 | 0.04961900 | 0.04958400 |
| 0.04190100 | 0.04113500 | 0.04061000 | 0.04029300 | 0.04011400 | 0.03997100 | 0.03980400 | 0.03962400 | 0.03944000 | 0.03925100 | 0.03910900 | 0.03904400 | 0.03898800 | 0.03888100 |
| 0.03938900 | 0.03867600 | 0.03816300 | 0.03786000 | 0.03767600 | 0.03746000 | 0.03722000 | 0.03710200 | 0.03707300 | 0.03694600 | 0.03670000 | 0.03649600 | 0.03642000 | 0.03637100 |
| 0.02599800 | 0.02580500 | 0.02569800 | 0.02562500 | 0.02550700 | 0.02531300 | 0.02513500 | 0.02503400 | 0.02496100 | 0.02487600 | 0.02479500 | 0.02472900 | 0.02469300 | 0.02469900 |
| 0.02798900 | 0.02760500 | 0.02739400 | 0.02732200 | 0.02733400 | 0.02726700 | 0.02707800 | 0.02692500 | 0.02687600 | 0.02680500 | 0.02665800 | 0.02656700 | 0.02658100 | 0.02652400 |
| 0.03434400 | 0.03389600 | 0.03357800 | 0.03327700 | 0.03301200 | 0.03279800 | 0.03264000 | 0.03257500 | 0.03257100 | 0.03249800 | 0.03231800 | 0.03215600 | 0.03208500 | 0.03201700 |



| 7453       | 7455       | 7457       | 7459       | 7461       | 7463       | 7465       | 7466       | 7468       | 7470       | 7472       | 7474       | 7476       | 7478       |
|------------|------------|------------|------------|------------|------------|------------|------------|------------|------------|------------|------------|------------|------------|
| 0.04191200 | 0.04180200 | 0.04167700 | 0.04155600 | 0.04144500 | 0.04134900 | 0.04129800 | 0.04125700 | 0.04113000 | 0.04091200 | 0.04069300 | 0.04052700 | 0.04038700 | 0.04023700 |
| 0.03280300 | 0.03275500 | 0.03268000 | 0.03257000 | 0.03241600 | 0.03222000 | 0.03200300 | 0.03179900 | 0.03163800 | 0.03152300 | 0.03142200 | 0.03132600 | 0.03124700 | 0.03116700 |
| 0.05149000 | 0.05124900 | 0.05112800 | 0.05104900 | 0.05090400 | 0.05073100 | 0.05058800 | 0.05049400 | 0.05045200 | 0.05037500 | 0.05022200 | 0.05013500 | 0.05016200 | 0.05015000 |
| 0.04780500 | 0.04762600 | 0.04746200 | 0.04747400 | 0.04759000 | 0.04760500 | 0.04748000 | 0.04733400 | 0.04720700 | 0.04702500 | 0.04676000 | 0.04649500 | 0.04631300 | 0.04621300 |
| 0.03451800 | 0.03428100 | 0.03398500 | 0.03373300 | 0.03366300 | 0.03371500 | 0.03372000 | 0.03370500 | 0.03378900 | 0.03389200 | 0.03381600 | 0.03359100 | 0.03343200 | 0.03339000 |
| 0.04666200 | 0.04658300 | 0.04650100 | 0.04636900 | 0.04615700 | 0.04593400 | 0.04579600 | 0.04574100 | 0.04568000 | 0.04553400 | 0.04529700 | 0.04509200 | 0.04506000 | 0.04513900 |
| 0.04769200 | 0.04749500 | 0.04720800 | 0.04695400 | 0.04685800 | 0.04688100 | 0.04688600 | 0.04683000 | 0.04674500 | 0.04658600 | 0.04628900 | 0.04598100 | 0.04585400 | 0.04587200 |
| 0.03779400 | 0.03762800 | 0.03749300 | 0.03738900 | 0.03732900 | 0.03727600 | 0.03716800 | 0.03701000 | 0.03687400 | 0.03678100 | 0.03667700 | 0.03657100 | 0.03651900 | 0.03647300 |
| 0.03772100 | 0.03765300 | 0.03759500 | 0.03749100 | 0.03736900 | 0.03727000 | 0.03714100 | 0.03695800 | 0.03682700 | 0.03679900 | 0.03676000 | 0.03665500 | 0.03657800 | 0.03654000 |
| 0.04140200 | 0.04139700 | 0.04127800 | 0.04108200 | 0.04092200 | 0.04083600 | 0.04073400 | 0.04058800 | 0.04048800 | 0.04046500 | 0.04042000 | 0.04028100 | 0.04011200 | 0.03996700 |
| 0.04947100 | 0.04926600 | 0.04914000 | 0.04917200 | 0.04922800 | 0.04918300 | 0.04903800 | 0.04886100 | 0.04875500 | 0.04872300 | 0.04860400 | 0.04836300 | 0.04817900 | 0.04809700 |
| 0.03875900 | 0.03866800 | 0.03856700 | 0.03840400 | 0.03820600 | 0.03801100 | 0.03782600 | 0.03766800 | 0.03757200 | 0.03752600 | 0.03746100 | 0.03735700 | 0.03729000 | 0.03728000 |
| 0.03620000 | 0.03592800 | 0.03571400 | 0.03563100 | 0.03558900 | 0.03549300 | 0.03534200 | 0.03521100 | 0.03519100 | 0.03525900 | 0.03523100 | 0.03505900 | 0.03494200 | 0.03496400 |
| 0.02471500 | 0.02468600 | 0.02458600 | 0.02445900 | 0.02437800 | 0.02436200 | 0.02438200 | 0.02437200 | 0.02428300 | 0.02412800 | 0.02394100 | 0.02377500 | 0.02371300 | 0.02376700 |
| 0.02629600 | 0.02606500 | 0.02598400 | 0.02598800 | 0.02600700 | 0.02607200 | 0.02615700 | 0.02619100 | 0.02618000 | 0.02609700 | 0.02586000 | 0.02557300 | 0.02545200 | 0.02549500 |
| 0.03187900 | 0.03172000 | 0.03157500 | 0.03142900 | 0.03130900 | 0.03122800 | 0.03118200 | 0.03123800 | 0.03139700 | 0.03148100 | 0.03133700 | 0.03107400 | 0.03092700 | 0.03097300 |

| 7480       | 7482       | 7484       | 7486       | 7488       | 7490       | 7492       | 7493       | 7495       | 7497       | 7499       | 7501       | 7503       | 7505       |
|------------|------------|------------|------------|------------|------------|------------|------------|------------|------------|------------|------------|------------|------------|
| 0.04013300 | 0.04014500 | 0.04023900 | 0.04033800 | 0.04042400 | 0.04052300 | 0.04069000 | 0.04095000 | 0.04125900 | 0.04153700 | 0.04173800 | 0.04184900 | 0.04183300 | 0.04162700 |
| 0.03105800 | 0.03095500 | 0.03095800 | 0.03112400 | 0.03135100 | 0.03148300 | 0.03153400 | 0.03165500 | 0.03192000 | 0.03225700 | 0.03252100 | 0.03261700 | 0.03256600 | 0.03241000 |
| 0.05002200 | 0.04986400 | 0.04979800 | 0.04983900 | 0.04990600 | 0.04996000 | 0.05006100 | 0.05030500 | 0.05070300 | 0.05111200 | 0.05138500 | 0.05148900 | 0.05142000 | 0.05121000 |
| 0.04614200 | 0.04608300 | 0.04610500 | 0.04627700 | 0.04651500 | 0.04668400 | 0.04679200 | 0.04693500 | 0.04712300 | 0.04728800 | 0.04740000 | 0.04749400 | 0.04758800 | 0.04758900 |
| 0.03332200 | 0.03316900 | 0.03304100 | 0.03306200 | 0.03323900 | 0.03347000 | 0.03363800 | 0.03372300 | 0.03381100 | 0.03397700 | 0.03419000 | 0.03435100 | 0.03439400 | 0.03431600 |
| 0.04513700 | 0.04502500 | 0.04498900 | 0.04516400 | 0.04544200 | 0.04565000 | 0.04578200 | 0.04592100 | 0.04610700 | 0.04631200 | 0.04650400 | 0.04667900 | 0.04676100 | 0.04658900 |
| 0.04589800 | 0.04592600 | 0.04600400 | 0.04612200 | 0.04624400 | 0.04635400 | 0.04646600 | 0.04661500 | 0.04683900 | 0.04712100 | 0.04735200 | 0.04742200 | 0.04732800 | 0.04716400 |
| 0.03636000 | 0.03624100 | 0.03623000 | 0.03633700 | 0.03646600 | 0.03655400 | 0.03664400 | 0.03681900 | 0.03709700 | 0.03740600 | 0.03764100 | 0.03774100 | 0.03771300 | 0.03760800 |
| 0.03642100 | 0.03620900 | 0.03608200 | 0.03618100 | 0.03640100 | 0.03659200 | 0.03679500 | 0.03705500 | 0.03731000 | 0.03754000 | 0.03777100 | 0.03796400 | 0.03800200 | 0.03778100 |
| 0.03985000 | 0.03979000 | 0.03980500 | 0.03990800 | 0.04011900 | 0.04037400 | 0.04057900 | 0.04075800 | 0.04098500 | 0.04123600 | 0.04139300 | 0.04136500 | 0.04121200 | 0.04107000 |
| 0.04801100 | 0.04794800 | 0.04802500 | 0.04825000 | 0.04848400 | 0.04861200 | 0.04868500 | 0.04885200 | 0.04914400 | 0.04942600 | 0.04958400 | 0.04963000 | 0.04957300 | 0.04940900 |
| 0.03725000 | 0.03717000 | 0.03711600 | 0.03715000 | 0.03722000 | 0.03725200 | 0.03728700 | 0.03744600 | 0.03775400 | 0.03808500 | 0.03833100 | 0.03849700 | 0.03857500 | 0.03850300 |
| 0.03495000 | 0.03478900 | 0.03463800 | 0.03466900 | 0.03481700 | 0.03494800 | 0.03508300 | 0.03530000 | 0.03557600 | 0.03581800 | 0.03602000 | 0.03621100 | 0.03629600 | 0.03613900 |
| 0.02383800 | 0.02384500 | 0.02382800 | 0.02386200 | 0.02392100 | 0.02395700 | 0.02403400 | 0.02423900 | 0.02454700 | 0.02483900 | 0.02497800 | 0.02490900 | 0.02473300 | 0.02461400 |
| 0.02551800 | 0.02546500 | 0.02541900 | 0.02542100 | 0.02543500 | 0.02547400 | 0.02559900 | 0.02581300 | 0.02606000 | 0.02627700 | 0.02641000 | 0.02646200 | 0.02650500 | 0.02655800 |
| 0.03105500 | 0.03097500 | 0.03077000 | 0.03066700 | 0.03074900 | 0.03092800 | 0.03114500 | 0.03137700 | 0.03161200 | 0.03185300 | 0.03204600 | 0.03211900 | 0.03204600 | 0.03183700 |

| 7507       | 7509       | 7511       | 7513       | 7515       | 7517       | 7519       | 7520       | 7522       | 7524       | 7526       | 7528       | 7530       | 7532       |
|------------|------------|------------|------------|------------|------------|------------|------------|------------|------------|------------|------------|------------|------------|
| 0.04124500 | 0.04080700 | 0.04043000 | 0.04014200 | 0.03995900 | 0.03990700 | 0.03993000 | 0.03994700 | 0.03995900 | 0.03997000 | 0.03995300 | 0.03991000 | 0.03985500 | 0.03979800 |
| 0.03216500 | 0.03190100 | 0.03167200 | 0.03142700 | 0.03114000 | 0.03091300 | 0.03080400 | 0.03073700 | 0.03064800 | 0.03059200 | 0.03063500 | 0.03075900 | 0.03088100 | 0.03093900 |
| 0.05094200 | 0.05062700 | 0.05024200 | 0.04985100 | 0.04953400 | 0.04932100 | 0.04923800 | 0.04926800 | 0.04930700 | 0.04929400 | 0.04929100 | 0.04934700 | 0.04942400 | 0.04950300 |
| 0.04736500 | 0.04698000 | 0.04663300 | 0.04637800 | 0.04618800 | 0.04609400 | 0.04605300 | 0.04593000 | 0.04570200 | 0.04555000 | 0.04561500 | 0.04580800 | 0.04595900 | 0.04605400 |
| 0.03413500 | 0.03389200 | 0.03367700 | 0.03354100 | 0.03346800 | 0.03342300 | 0.03336600 | 0.03326300 | 0.03314000 | 0.03309700 | 0.03319300 | 0.03334100 | 0.03342900 | 0.03346600 |
| 0.04616300 | 0.04571100 | 0.04540000 | 0.04520700 | 0.04509100 | 0.04504700 | 0.04502400 | 0.04497400 | 0.04490600 | 0.04481700 | 0.04470900 | 0.04465500 | 0.04470900 | 0.04482500 |
| 0.04700100 | 0.04682500 | 0.04659600 | 0.04632200 | 0.04604700 | 0.04580400 | 0.04564400 | 0.04562100 | 0.04569600 | 0.04574100 | 0.04570900 | 0.04567500 | 0.04571400 | 0.04579100 |
| 0.03745300 | 0.03723100 | 0.03695400 | 0.03670100 | 0.03652300 | 0.03640200 | 0.03627900 | 0.03613200 | 0.03600300 | 0.03591600 | 0.03588100 | 0.03593800 | 0.03605900 | 0.03615200 |
| 0.03734800 | 0.03689400 | 0.03656200 | 0.03634200 | 0.03614500 | 0.03595200 | 0.03584300 | 0.03583800 | 0.03583900 | 0.03580500 | 0.03582400 | 0.03591000 | 0.03593100 | 0.03583800 |
| 0.04096200 | 0.04080200 | 0.04056100 | 0.04032900 | 0.04022000 | 0.04020800 | 0.04011000 | 0.03986000 | 0.03960200 | 0.03945500 | 0.03945300 | 0.03959700 | 0.03979100 | 0.03989200 |
| 0.04917400 | 0.04889800 | 0.04862100 | 0.04840100 | 0.04823800 | 0.04808800 | 0.04794900 | 0.04784300 | 0.04776500 | 0.04770700 | 0.04768900 | 0.04771400 | 0.04774000 | 0.04775400 |
| 0.03827500 | 0.03796900 | 0.03767500 | 0.03745400 | 0.03729200 | 0.03709800 | 0.03683400 | 0.03657900 | 0.03640300 | 0.03631500 | 0.03632200 | 0.03644600 | 0.03664700 | 0.03682200 |
| 0.03576600 | 0.03534300 | 0.03502100 | 0.03482700 | 0.03468100 | 0.03455000 | 0.03448700 | 0.03449200 | 0.03449600 | 0.03447000 | 0.03442900 | 0.03438300 | 0.03435100 | 0.03435500 |
| 0.02455300 | 0.02442000 | 0.02420000 | 0.02400700 | 0.02390500 | 0.02387900 | 0.02386700 | 0.02381100 | 0.02374900 | 0.02374200 | 0.02372600 | 0.02367300 | 0.02371300 | 0.02388700 |
| 0.02653100 | 0.02633900 | 0.02602800 | 0.02575600 | 0.02562900 | 0.02556600 | 0.02541700 | 0.02520600 | 0.02509900 | 0.02513900 | 0.02522500 | 0.02530100 | 0.02539100 | 0.02548000 |
| 0.03158300 | 0.03138900 | 0.03121600 | 0.03097300 | 0.03070900 | 0.03054600 | 0.03049700 | 0.03048800 | 0.03050300 | 0.03059200 | 0.03071500 | 0.03077200 | 0.03076600 | 0.03076100 |

| 7534       | 7536       | 7538       | 7540       | 7542       | 7544       | 7546       | 7547       | 7549       | 7551       | 7553       | 7555       | 7557       | 7559       |
|------------|------------|------------|------------|------------|------------|------------|------------|------------|------------|------------|------------|------------|------------|
| 0.03978500 | 0.03982500 | 0.03989000 | 0.04000000 | 0.04016900 | 0.04031400 | 0.04032800 | 0.04016800 | 0.03987600 | 0.03958700 | 0.03941400 | 0.03929600 | 0.03911200 | 0.03888200 |
| 0.03093200 | 0.03088700 | 0.03084900 | 0.03087900 | 0.03100000 | 0.03113000 | 0.03109300 | 0.03082900 | 0.03051600 | 0.03034400 | 0.03025300 | 0.03010100 | 0.02994600 | 0.02986800 |
| 0.04962900 | 0.04979300 | 0.04987600 | 0.04979900 | 0.04964000 | 0.04953400 | 0.04948500 | 0.04942900 | 0.04939500 | 0.04940600 | 0.04936800 | 0.04921300 | 0.04901500 | 0.04887000 |
| 0.04615900 | 0.04626000 | 0.04632800 | 0.04638400 | 0.04642100 | 0.04643700 | 0.04644900 | 0.04640500 | 0.04624000 | 0.04599000 | 0.04572400 | 0.04548100 | 0.04528500 | 0.04512500 |
| 0.03348100 | 0.03342800 | 0.03331400 | 0.03322000 | 0.03320000 | 0.03323100 | 0.03327200 | 0.03329900 | 0.03328600 | 0.03321200 | 0.03310600 | 0.03302400 | 0.03298400 | 0.03293400 |
| 0.04491600 | 0.04490900 | 0.04481600 | 0.04475300 | 0.04480600 | 0.04491300 | 0.04496200 | 0.04489000 | 0.04471700 | 0.04453900 | 0.04440300 | 0.04427200 | 0.04413700 | 0.04404200 |
| 0.04582700 | 0.04580200 | 0.04577500 | 0.04582600 | 0.04593200 | 0.04596400 | 0.04590200 | 0.04584600 | 0.04582100 | 0.04576100 | 0.04560900 | 0.04540600 | 0.04527800 | 0.04521100 |
| 0.03622800 | 0.03633400 | 0.03643400 | 0.03651400 | 0.03661500 | 0.03671400 | 0.03674800 | 0.03666800 | 0.03644200 | 0.03611800 | 0.03579100 | 0.03550700 | 0.03529200 | 0.03517800 |
| 0.03576900 | 0.03583400 | 0.03599500 | 0.03617000 | 0.03629800 | 0.03636400 | 0.03640900 | 0.03642100 | 0.03628600 | 0.03598900 | 0.03565100 | 0.03534700 | 0.03511100 | 0.03497600 |
| 0.03985100 | 0.03975900 | 0.03977500 | 0.03997800 | 0.04024700 | 0.04036300 | 0.04025100 | 0.04001400 | 0.03977500 | 0.03962000 | 0.03958300 | 0.03958900 | 0.03953200 | 0.03939200 |
| 0.04779500 | 0.04787600 | 0.04798300 | 0.04809700 | 0.04820000 | 0.04828200 | 0.04827500 | 0.04811700 | 0.04786900 | 0.04763500 | 0.04745500 | 0.04733400 | 0.04726500 | 0.04721500 |
| 0.03691900 | 0.03694300 | 0.03693500 | 0.03699100 | 0.03715000 | 0.03729600 | 0.03729700 | 0.03714900 | 0.03691800 | 0.03668600 | 0.03651800 | 0.03638600 | 0.03627200 | 0.03622700 |
| 0.03440000 | 0.03448200 | 0.03459900 | 0.03472600 | 0.03482900 | 0.03490100 | 0.03491700 | 0.03481700 | 0.03463100 | 0.03445700 | 0.03429200 | 0.03407300 | 0.03383100 | 0.03362800 |
| 0.02404200 | 0.02409300 | 0.02414700 | 0.02428100 | 0.02437700 | 0.02431300 | 0.02416700 | 0.02408300 | 0.02406500 | 0.02404800 | 0.02400600 | 0.02394000 | 0.02383900 | 0.02370900 |
| 0.02550700 | 0.02550100 | 0.02556800 | 0.02571900 | 0.02584800 | 0.02586300 | 0.02576100 | 0.02558100 | 0.02539300 | 0.02525800 | 0.02519000 | 0.02516900 | 0.02515600 | 0.02511800 |
| 0.03075200 | 0.03073600 | 0.03079800 | 0.03099800 | 0.03119500 | 0.03118000 | 0.03099000 | 0.03081800 | 0.03067000 | 0.03045000 | 0.03024500 | 0.03022700 | 0.03032200 | 0.03032300 |

| 7561       | 7563       | 7565       | 7567       | 7569       | 7571       | 7573       | 7574       | 7576       | 7578       | 7580       | 7582       | 7584       | 7586       |
|------------|------------|------------|------------|------------|------------|------------|------------|------------|------------|------------|------------|------------|------------|
| 0.03872100 | 0.03869400 | 0.03877500 | 0.03885600 | 0.03885200 | 0.03883700 | 0.03892600 | 0.03911100 | 0.03931200 | 0.03949300 | 0.03967500 | 0.03990500 | 0.04017200 | 0.04036900 |
| 0.02976900 | 0.02961700 | 0.02951700 | 0.02944800 | 0.02935600 | 0.02937300 | 0.02962400 | 0.02999900 | 0.03032800 | 0.03058600 | 0.03081700 | 0.03101800 | 0.03121600 | 0.03143100 |
| 0.04875700 | 0.04858800 | 0.04834200 | 0.04811600 | 0.04803000 | 0.04813400 | 0.04841000 | 0.04875300 | 0.04901800 | 0.04922400 | 0.04950900 | 0.04987600 | 0.05017500 | 0.05029300 |
| 0.04496000 | 0.04481600 | 0.04476400 | 0.04482200 | 0.04495500 | 0.04510400 | 0.04522100 | 0.04535600 | 0.04560800 | 0.04592700 | 0.04615100 | 0.04626400 | 0.04640700 | 0.04663700 |
| 0.03279700 | 0.03258700 | 0.03241800 | 0.03239700 | 0.03253100 | 0.03268900 | 0.03276200 | 0.03281900 | 0.03295400 | 0.03314600 | 0.03336800 | 0.03357900 | 0.03373600 | 0.03382300 |
| 0.04398300 | 0.04391200 | 0.04379300 | 0.04365300 | 0.04359200 | 0.04366900 | 0.04384400 | 0.04409700 | 0.04439600 | 0.04464800 | 0.04483900 | 0.04503000 | 0.04517800 | 0.04520900 |
| 0.04503900 | 0.04475600 | 0.04452600 | 0.04444800 | 0.04452000 | 0.04469100 | 0.04490500 | 0.04512200 | 0.04530900 | 0.04543200 | 0.04551100 | 0.04565900 | 0.04596100 | 0.04630000 |
| 0.03518400 | 0.03528600 | 0.03537600 | 0.03537400 | 0.03532400 | 0.03530000 | 0.03538100 | 0.03563000 | 0.03596700 | 0.03625000 | 0.03642900 | 0.03653200 | 0.03660900 | 0.03669700 |
| 0.03487800 | 0.03473900 | 0.03461800 | 0.03460200 | 0.03467200 | 0.03479600 | 0.03500600 | 0.03529800 | 0.03556500 | 0.03577800 | 0.03604000 | 0.03638200 | 0.03668500 | 0.03682000 |
| 0.03921300 | 0.03904500 | 0.03891300 | 0.03881400 | 0.03879000 | 0.03892500 | 0.03917900 | 0.03940000 | 0.03954000 | 0.03967600 | 0.03984500 | 0.03999900 | 0.04014300 | 0.04035100 |
| 0.04713300 | 0.04701400 | 0.04691600 | 0.04687200 | 0.04684100 | 0.04681700 | 0.04690300 | 0.04715700 | 0.04747100 | 0.04772500 | 0.04791300 | 0.04811800 | 0.04839400 | 0.04865200 |
| 0.03619300 | 0.03604500 | 0.03581600 | 0.03564000 | 0.03559100 | 0.03567400 | 0.03589100 | 0.03619900 | 0.03646600 | 0.03664400 | 0.03684900 | 0.03715500 | 0.03745800 | 0.03760300 |
| 0.03348300 | 0.03340900 | 0.03341500 | 0.03348000 | 0.03357200 | 0.03370200 | 0.03390800 | 0.03416500 | 0.03436900 | 0.03448800 | 0.03460700 | 0.03477800 | 0.03495900 | 0.03510600 |
| 0.02359200 | 0.02352000 | 0.02346900 | 0.02339600 | 0.02328800 | 0.02321800 | 0.02330200 | 0.02353400 | 0.02377100 | 0.02392500 | 0.02404100 | 0.02421100 | 0.02446600 | 0.02471200 |
| 0.02506700 | 0.02502300 | 0.02497000 | 0.02493100 | 0.02496400 | 0.02507600 | 0.02522500 | 0.02539000 | 0.02556400 | 0.02571800 | 0.02583900 | 0.02597200 | 0.02613400 | 0.02621600 |
| 0.03022100 | 0.03012100 | 0.03004700 | 0.02998700 | 0.02995400 | 0.02997100 | 0.03002500 | 0.03013600 | 0.03039100 | 0.03074600 | 0.03101700 | 0.03114600 | 0.03121600 | 0.03126900 |

| 7588       | 7590       | 7592       | 7594       | 7596       | 7598       | 7600       | 7601       | 7603       | 7605       | 7607       | 7609       | 7611       | 7613       |
|------------|------------|------------|------------|------------|------------|------------|------------|------------|------------|------------|------------|------------|------------|
| 0.04039400 | 0.04026600 | 0.04008400 | 0.03989100 | 0.03970800 | 0.03963700 | 0.03974400 | 0.03989500 | 0.03992000 | 0.03983700 | 0.03977400 | 0.03975800 | 0.03972700 | 0.03964700 |
| 0.03157400 | 0.03156700 | 0.03142500 | 0.03119600 | 0.03097200 | 0.03089300 | 0.03100800 | 0.03113600 | 0.03106700 | 0.03087800 | 0.03079900 | 0.03083900 | 0.03078700 | 0.03051100 |
| 0.05025400 | 0.05015300 | 0.05005900 | 0.04995700 | 0.04980900 | 0.04969500 | 0.04975200 | 0.04988700 | 0.04986300 | 0.04969000 | 0.04957200 | 0.04955300 | 0.04949200 | 0.04931600 |
| 0.04681600 | 0.04677200 | 0.04650900 | 0.04621300 | 0.04606500 | 0.04612300 | 0.04628400 | 0.04636300 | 0.04630000 | 0.04621900 | 0.04620500 | 0.04615800 | 0.04599200 | 0.04575200 |
| 0.03376800 | 0.03356700 | 0.03342800 | 0.03350300 | 0.03366700 | 0.03373200 | 0.03370200 | 0.03369200 | 0.03370700 | 0.03366300 | 0.03355800 | 0.03343700 | 0.03327800 | 0.03307500 |
| 0.04516900 | 0.04516200 | 0.04518000 | 0.04513300 | 0.04501300 | 0.04493200 | 0.04501200 | 0.04522100 | 0.04535500 | 0.04531000 | 0.04521400 | 0.04516600 | 0.04505500 | 0.04478000 |
| 0.04645400 | 0.04638800 | 0.04624300 | 0.04608800 | 0.04592600 | 0.04585400 | 0.04592700 | 0.04600900 | 0.04599200 | 0.04595900 | 0.04599600 | 0.04604500 | 0.04597800 | 0.04574000 |
| 0.03680800 | 0.03691000 | 0.03691100 | 0.03671200 | 0.03637400 | 0.03613300 | 0.03615000 | 0.03632300 | 0.03643200 | 0.03641900 | 0.03639700 | 0.03645000 | 0.03647600 | 0.03631600 |
| 0.03673500 | 0.03650000 | 0.03628400 | 0.03616400 | 0.03607800 | 0.03601500 | 0.03603500 | 0.03610000 | 0.03608100 | 0.03595000 | 0.03582400 | 0.03580000 | 0.03581000 | 0.03569900 |
| 0.04057500 | 0.04065500 | 0.04054000 | 0.04033000 | 0.04016600 | 0.04013500 | 0.04022300 | 0.04032400 | 0.04035400 | 0.04031200 | 0.04023700 | 0.04015700 | 0.04004200 | 0.03984100 |
| 0.04874300 | 0.04867700 | 0.04854200 | 0.04832200 | 0.04806300 | 0.04797300 | 0.04815000 | 0.04840700 | 0.04849700 | 0.04837900 | 0.04821900 | 0.04817300 | 0.04817700 | 0.04801000 |
| 0.03754700 | 0.03737300 | 0.03718400 | 0.03700000 | 0.03683400 | 0.03677900 | 0.03689500 | 0.03705700 | 0.03708800 | 0.03698100 | 0.03688900 | 0.03690600 | 0.03694300 | 0.03681900 |
| 0.03518100 | 0.03515300 | 0.03503500 | 0.03486100 | 0.03467200 | 0.03456900 | 0.03464400 | 0.03483400 | 0.03495900 | 0.03493500 | 0.03485500 | 0.03481100 | 0.03474200 | 0.03454500 |
| 0.02482200 | 0.02479100 | 0.02467100 | 0.02450400 | 0.02436700 | 0.02430900 | 0.02429100 | 0.02427600 | 0.02424600 | 0.02422200 | 0.02427200 | 0.02435700 | 0.02432400 | 0.02412400 |
| 0.02612400 | 0.02593800 | 0.02579700 | 0.02571200 | 0.02564600 | 0.02567900 | 0.02587500 | 0.02608500 | 0.02611100 | 0.02599300 | 0.02593600 | 0.02602400 | 0.02608800 | 0.02593600 |
| 0.03129000 | 0.03128300 | 0.03123000 | 0.03107200 | 0.03085000 | 0.03075800 | 0.03088700 | 0.03106200 | 0.03107400 | 0.03095700 | 0.03090000 | 0.03094200 | 0.03094600 | 0.03081000 |

| 7615       | 7617       | 7619       | 7621       | 7623       | 7625       | 7627       | 7628       | 7630       | 7632       | 7634       | 7636       | 7638       | 7640       |
|------------|------------|------------|------------|------------|------------|------------|------------|------------|------------|------------|------------|------------|------------|
| 0.03947600 | 0.03914200 | 0.03869700 | 0.03831200 | 0.03803600 | 0.03780300 | 0.03761200 | 0.03751400 | 0.03750100 | 0.03752500 | 0.03752300 | 0.03746100 | 0.03741100 | 0.03745000 |
| 0.03010100 | 0.02972900 | 0.02947500 | 0.02930000 | 0.02909900 | 0.02879900 | 0.02847800 | 0.02832400 | 0.02837000 | 0.02841800 | 0.02835100 | 0.02830900 | 0.02840600 | 0.02854400 |
| 0.04906200 | 0.04873300 | 0.04833000 | 0.04795800 | 0.04769900 | 0.04750900 | 0.04734100 | 0.04719300 | 0.04702700 | 0.04686100 | 0.04685400 | 0.04706700 | 0.04730200 | 0.04736900 |
| 0.04547700 | 0.04517100 | 0.04488800 | 0.04466700 | 0.04445000 | 0.04417800 | 0.04394300 | 0.04390500 | 0.04400900 | 0.04404100 | 0.04398600 | 0.04400700 | 0.04414900 | 0.04430900 |
| 0.03291900 | 0.03284000 | 0.03272500 | 0.03255600 | 0.03243400 | 0.03237800 | 0.03233800 | 0.03229800 | 0.03223800 | 0.03214100 | 0.03207700 | 0.03212600 | 0.03225000 | 0.03234800 |
| 0.04444500 | 0.04414600 | 0.04382200 | 0.04343500 | 0.04305300 | 0.04272400 | 0.04246300 | 0.04232500 | 0.04233900 | 0.04242500 | 0.04253200 | 0.04270100 | 0.04292800 | 0.04312100 |
| 0.04537700 | 0.04495500 | 0.04457100 | 0.04434600 | 0.04425400 | 0.04414300 | 0.04395500 | 0.04377100 | 0.04361700 | 0.04344600 | 0.04331300 | 0.04332900 | 0.04347700 | 0.04366300 |
| 0.03596000 | 0.03554400 | 0.03519700 | 0.03495500 | 0.03476700 | 0.03456900 | 0.03435600 | 0.03416100 | 0.03400000 | 0.03389700 | 0.03393300 | 0.03416000 | 0.03448000 | 0.03474400 |
| 0.03541900 | 0.03505900 | 0.03472200 | 0.03445200 | 0.03423200 | 0.03401900 | 0.03381500 | 0.03366700 | 0.03358800 | 0.03352500 | 0.03346600 | 0.03350800 | 0.03369100 | 0.03386500 |
| 0.03958800 | 0.03934900 | 0.03912200 | 0.03887800 | 0.03862300 | 0.03841100 | 0.03829900 | 0.03829300 | 0.03829100 | 0.03819400 | 0.03804000 | 0.03798100 | 0.03812300 | 0.03841300 |
| 0.04761200 | 0.04719100 | 0.04693700 | 0.04682200 | 0.04671300 | 0.04651500 | 0.04622900 | 0.04595900 | 0.04579100 | 0.04572500 | 0.04575900 | 0.04591400 | 0.04615000 | 0.04635100 |
| 0.03646200 | 0.03601100 | 0.03565300 | 0.03539400 | 0.03513300 | 0.03486300 | 0.03468100 | 0.03463900 | 0.03466200 | 0.03463400 | 0.03458200 | 0.03464600 | 0.03484000 | 0.03504300 |
| 0.03425500 | 0.03397700 | 0.03371800 | 0.03341100 | 0.03305800 | 0.03277000 | 0.03267400 | 0.03276900 | 0.03291200 | 0.03295700 | 0.03289600 | 0.03283600 | 0.03286600 | 0.03293200 |
| 0.02387100 | 0.02366500 | 0.02351200 | 0.02338500 | 0.02325500 | 0.02309300 | 0.02294100 | 0.02291900 | 0.02304400 | 0.02317500 | 0.02322800 | 0.02326400 | 0.02331100 | 0.02335100 |
| 0.02563000 | 0.02536000 | 0.02516900 | 0.02500900 | 0.02489800 | 0.02485200 | 0.02481100 | 0.02472100 | 0.02459600 | 0.02451900 | 0.02457100 | 0.02469500 | 0.02476400 | 0.02478700 |
| 0.03054200 | 0.03020500 | 0.02987200 | 0.02963000 | 0.02956500 | 0.02964100 | 0.02969000 | 0.02963000 | 0.02952800 | 0.02943900 | 0.02937800 | 0.02940400 | 0.02953400 | 0.02971000 |

| 7642       | 7644       | 7646       | 7648       | 7650       | 7652       | 7654       | 7655       | 7657       | 7659       | 7661       | 7663       | 7665       | 7667       |
|------------|------------|------------|------------|------------|------------|------------|------------|------------|------------|------------|------------|------------|------------|
| 0.03752500 | 0.03761200 | 0.03779600 | 0.03809900 | 0.03846900 | 0.03887700 | 0.03923700 | 0.03943500 | 0.03948900 | 0.03948600 | 0.03941300 | 0.03920900 | 0.03892800 | 0.03868500 |
| 0.02862500 | 0.02872100 | 0.02890500 | 0.02912100 | 0.02935000 | 0.02968400 | 0.03010000 | 0.03042000 | 0.03052800 | 0.03047900 | 0.03038000 | 0.03021800 | 0.02993300 | 0.02959300 |
| 0.04734400 | 0.04740900 | 0.04760800 | 0.04784200 | 0.04809000 | 0.04841800 | 0.04877700 | 0.04902000 | 0.04912900 | 0.04920400 | 0.04921100 | 0.04900400 | 0.04863600 | 0.04831600 |
| 0.04441000 | 0.04447400 | 0.04456100 | 0.04473800 | 0.04504600 | 0.04537900 | 0.04556200 | 0.04561200 | 0.04569400 | 0.04584300 | 0.04591500 | 0.04577300 | 0.04546300 | 0.04516900 |
| 0.03237700 | 0.03243700 | 0.03261300 | 0.03281300 | 0.03296300 | 0.03309800 | 0.03320900 | 0.03328200 | 0.03334400 | 0.03335600 | 0.03327500 | 0.03316000 | 0.03308300 | 0.03302300 |
| 0.04324500 | 0.04335700 | 0.04349100 | 0.04362900 | 0.04379800 | 0.04403800 | 0.04429900 | 0.04450400 | 0.04463800 | 0.04470500 | 0.04467600 | 0.04451100 | 0.04425300 | 0.04399200 |
| 0.04384700 | 0.04402400 | 0.04421000 | 0.04445300 | 0.04476000 | 0.04508700 | 0.04541000 | 0.04568100 | 0.04578900 | 0.04571000 | 0.04557000 | 0.04544600 | 0.04526300 | 0.04500700 |
| 0.03492900 | 0.03508500 | 0.03521300 | 0.03531100 | 0.03541400 | 0.03556400 | 0.03578600 | 0.03605000 | 0.03624600 | 0.03630100 | 0.03623700 | 0.03605500 | 0.03578500 | 0.03555800 |
| 0.03391200 | 0.03397400 | 0.03421200 | 0.03456300 | 0.03491400 | 0.03527200 | 0.03559200 | 0.03575300 | 0.03572800 | 0.03563000 | 0.03557900 | 0.03555400 | 0.03543300 | 0.03519300 |
| 0.03871800 | 0.03899400 | 0.03922300 | 0.03935200 | 0.03943600 | 0.03964100 | 0.03998800 | 0.04025800 | 0.04029600 | 0.04022600 | 0.04017200 | 0.04003600 | 0.03975700 | 0.03943900 |
| 0.04645100 | 0.04653000 | 0.04669700 | 0.04689400 | 0.04701000 | 0.04710200 | 0.04728200 | 0.04751300 | 0.04772400 | 0.04791600 | 0.04801900 | 0.04787300 | 0.04750900 | 0.04715600 |
| 0.03518200 | 0.03526900 | 0.03534600 | 0.03548900 | 0.03577700 | 0.03616300 | 0.03649000 | 0.03664900 | 0.03664000 | 0.03650700 | 0.03630500 | 0.03609900 | 0.03593100 | 0.03577600 |
| 0.03295000 | 0.03296800 | 0.03309600 | 0.03334000 | 0.03362800 | 0.03388400 | 0.03404200 | 0.03411600 | 0.03419600 | 0.03432200 | 0.03440400 | 0.03431900 | 0.03407800 | 0.03381900 |
| 0.02342700 | 0.02354600 | 0.02361700 | 0.02364900 | 0.02377300 | 0.02399300 | 0.02416900 | 0.02422400 | 0.02419900 | 0.02417000 | 0.02418300 | 0.02420700 | 0.02416600 | 0.02402300 |
| 0.02483600 | 0.02491900 | 0.02504600 | 0.02524400 | 0.02550300 | 0.02578300 | 0.02600900 | 0.02612700 | 0.02613500 | 0.02605900 | 0.02593800 | 0.02578500 | 0.02564100 | 0.02558500 |
| 0.02985300 | 0.02991500 | 0.02991000 | 0.02988600 | 0.02991000 | 0.03007900 | 0.03040600 | 0.03072000 | 0.03084700 | 0.03082100 | 0.03076900 | 0.03069100 | 0.03055800 | 0.03040900 |



| 7669       | 7671       | 7673       | 7675       | 7677       | 7679       | 7681       | 7682       | 7684       | 7686       | 7688       | 7690       | 7692       | 7694       |
|------------|------------|------------|------------|------------|------------|------------|------------|------------|------------|------------|------------|------------|------------|
| 0.03847900 | 0.03827400 | 0.03816800 | 0.03821700 | 0.03831000 | 0.03835800 | 0.03833800 | 0.03826000 | 0.03825500 | 0.03842300 | 0.03867800 | 0.03891200 | 0.03910300 | 0.03916600 |
| 0.02930400 | 0.02908500 | 0.02895300 | 0.02891600 | 0.02893700 | 0.02899700 | 0.02904800 | 0.02901700 | 0.02898100 | 0.02909700 | 0.02935000 | 0.02958800 | 0.02972900 | 0.02977100 |
| 0.04806000 | 0.04778600 | 0.04759300 | 0.04760800 | 0.04778900 | 0.04802700 | 0.04819300 | 0.04822000 | 0.04822000 | 0.04832100 | 0.04848900 | 0.04860200 | 0.04860200 | 0.04856400 |
| 0.04495200 | 0.04475100 | 0.04460800 | 0.04460400 | 0.04467700 | 0.04472700 | 0.04476400 | 0.04484200 | 0.04496300 | 0.04509300 | 0.04523700 | 0.04542000 | 0.04556700 | 0.04556500 |
| 0.03290500 | 0.03273300 | 0.03262700 | 0.03265500 | 0.03272700 | 0.03274300 | 0.03273400 | 0.03280600 | 0.03295300 | 0.03304200 | 0.03304500 | 0.03307500 | 0.03314700 | 0.03317300 |
| 0.04373000 | 0.04347100 | 0.04331200 | 0.04330700 | 0.04336700 | 0.04339500 | 0.04340200 | 0.04348500 | 0.04366100 | 0.04385000 | 0.04405400 | 0.04429500 | 0.04443800 | 0.04435900 |
| 0.04474900 | 0.04453100 | 0.04441100 | 0.04442400 | 0.04446800 | 0.04443600 | 0.04434200 | 0.04428800 | 0.04437600 | 0.04460300 | 0.04486800 | 0.04507900 | 0.04517900 | 0.04515300 |
| 0.03539800 | 0.03521300 | 0.03503700 | 0.03495800 | 0.03496500 | 0.03504800 | 0.03514600 | 0.03512600 | 0.03503800 | 0.03508900 | 0.03533500 | 0.03562500 | 0.03581300 | 0.03586000 |
| 0.03491600 | 0.03467700 | 0.03452100 | 0.03443400 | 0.03440100 | 0.03442400 | 0.03441800 | 0.03433800 | 0.03433000 | 0.03450100 | 0.03476900 | 0.03500200 | 0.03514700 | 0.03520800 |
| 0.03916800 | 0.03895700 | 0.03881500 | 0.03873800 | 0.03870400 | 0.03867600 | 0.03864100 | 0.03866400 | 0.03880600 | 0.03903100 | 0.03927400 | 0.03949800 | 0.03968100 | 0.03979800 |
| 0.04694200 | 0.04684600 | 0.04685100 | 0.04689200 | 0.04684400 | 0.04672600 | 0.04669600 | 0.04679500 | 0.04691400 | 0.04698700 | 0.04707300 | 0.04723900 | 0.04739800 | 0.04737200 |
| 0.03557600 | 0.03534600 | 0.03520400 | 0.03524200 | 0.03541800 | 0.03559800 | 0.03565000 | 0.03555400 | 0.03545300 | 0.03551000 | 0.03572300 | 0.03594500 | 0.03607700 | 0.03612600 |
| 0.03365300 | 0.03361100 | 0.03363900 | 0.03361200 | 0.03344900 | 0.03323300 | 0.03312200 | 0.03320200 | 0.03343500 | 0.03369600 | 0.03386400 | 0.03391400 | 0.03392700 | 0.03400600 |
| 0.02380500 | 0.02362900 | 0.02360300 | 0.02364100 | 0.02359400 | 0.02350700 | 0.02349600 | 0.02355300 | 0.02361700 | 0.02370800 | 0.02388100 | 0.02408900 | 0.02421500 | 0.02421400 |
| 0.02555500 | 0.02541500 | 0.02522800 | 0.02515000 | 0.02519400 | 0.02528000 | 0.02534300 | 0.02534100 | 0.02529900 | 0.02532600 | 0.02551500 | 0.02578600 | 0.02591700 | 0.02582600 |
| 0.03021100 | 0.02995300 | 0.02980600 | 0.02983500 | 0.02988700 | 0.02991600 | 0.02994900 | 0.02990700 | 0.02981800 | 0.02986600 | 0.03008700 | 0.03029900 | 0.03038600 | 0.03042900 |

| 7696       | 7698       | 7700       | 7702       | 7704       | 7706       | 7708       | 7709       | 7711       | 7713       | 7715       | 7717       | 7719       | 7721       |
|------------|------------|------------|------------|------------|------------|------------|------------|------------|------------|------------|------------|------------|------------|
| 0.03894600 | 0.03850400 | 0.03815300 | 0.03808900 | 0.03822000 | 0.03839200 | 0.03854000 | 0.03864200 | 0.03870200 | 0.03873100 | 0.03874100 | 0.03878600 | 0.03886300 | 0.03887700 |
| 0.02971000 | 0.02956400 | 0.02942100 | 0.02937300 | 0.02944400 | 0.02955900 | 0.02965200 | 0.02975000 | 0.02988800 | 0.02998400 | 0.02993000 | 0.02979300 | 0.02975600 | 0.02986600 |
| 0.04856000 | 0.04851900 | 0.04836100 | 0.04817000 | 0.04808900 | 0.04814000 | 0.04827100 | 0.04846300 | 0.04868400 | 0.04882100 | 0.04883200 | 0.04881200 | 0.04879000 | 0.04868300 |
| 0.04539800 | 0.04514300 | 0.04491900 | 0.04483200 | 0.04484500 | 0.04480100 | 0.04473000 | 0.04486000 | 0.04520600 | 0.04550000 | 0.04555700 | 0.04546300 | 0.04539700 | 0.04542900 |
| 0.03312900 | 0.03304800 | 0.03293000 | 0.03279300 | 0.03275400 | 0.03289600 | 0.03307900 | 0.03312100 | 0.03307900 | 0.03306400 | 0.03302800 | 0.03297900 | 0.03302000 | 0.03310700 |
| 0.04412700 | 0.04389100 | 0.04373700 | 0.04364200 | 0.04356500 | 0.04356200 | 0.04370000 | 0.04392100 | 0.04412100 | 0.04425700 | 0.04435100 | 0.04441000 | 0.04435600 | 0.04415400 |
| 0.04499900 | 0.04473600 | 0.04448000 | 0.04437000 | 0.04441100 | 0.04457400 | 0.04486900 | 0.04521200 | 0.04544000 | 0.04546800 | 0.04531600 | 0.04510000 | 0.04497900 | 0.04503900 |
| 0.03575900 | 0.03554000 | 0.03532900 | 0.03526500 | 0.03532500 | 0.03538200 | 0.03540600 | 0.03544200 | 0.03549300 | 0.03554100 | 0.03559000 | 0.03562500 | 0.03563900 | 0.03567800 |
| 0.03514800 | 0.03491700 | 0.03463900 | 0.03451100 | 0.03452900 | 0.03456900 | 0.03463500 | 0.03479000 | 0.03497900 | 0.03509700 | 0.03514700 | 0.03517800 | 0.03517300 | 0.03510300 |
| 0.03977500 | 0.03955900 | 0.03930400 | 0.03924300 | 0.03936700 | 0.03951600 | 0.03962800 | 0.03971400 | 0.03977000 | 0.03977100 | 0.03970300 | 0.03963600 | 0.03969000 | 0.03987000 |
| 0.04715900 | 0.04699500 | 0.04704700 | 0.04721800 | 0.04734400 | 0.04738000 | 0.04736300 | 0.04735600 | 0.04740300 | 0.04747200 | 0.04751100 | 0.04755000 | 0.04766500 | 0.04782300 |
| 0.03612000 | 0.03607100 | 0.03599900 | 0.03591600 | 0.03581900 | 0.03576200 | 0.03580800 | 0.03593200 | 0.03608300 | 0.03623100 | 0.03630700 | 0.03626900 | 0.03617300 | 0.03608800 |
| 0.03412500 | 0.03412000 | 0.03391200 | 0.03367100 | 0.03361600 | 0.03374300 | 0.03389000 | 0.03399300 | 0.03415600 | 0.03438700 | 0.03448600 | 0.03439600 | 0.03433400 | 0.03440100 |
| 0.02412000 | 0.02398900 | 0.02387900 | 0.02381800 | 0.02382600 | 0.02394700 | 0.02417800 | 0.02440200 | 0.02451100 | 0.02449300 | 0.02437200 | 0.02425000 | 0.02428300 | 0.02442800 |
| 0.02564700 | 0.02552100 | 0.02548200 | 0.02551300 | 0.02554600 | 0.02553200 | 0.02555800 | 0.02570300 | 0.02586700 | 0.02591400 | 0.02589200 | 0.02592900 | 0.02603400 | 0.02612200 |
| 0.03049100 | 0.03050900 | 0.03049200 | 0.03051600 | 0.03052200 | 0.03041500 | 0.03030100 | 0.03036500 | 0.03057900 | 0.03071000 | 0.03065400 | 0.03058400 | 0.03065000 | 0.03076400 |

| 7723       | 7725       | 7727       | 7729       | 7731       | 7733       | 7735       | 7736       | 7738       | 7740       | 7742       | 7744       | 7746       | 7748       |
|------------|------------|------------|------------|------------|------------|------------|------------|------------|------------|------------|------------|------------|------------|
| 0.03882400 | 0.03882900 | 0.03894400 | 0.03905500 | 0.03904700 | 0.03901000 | 0.03917300 | 0.03959500 | 0.04002600 | 0.04022400 | 0.04030200 | 0.04048800 | 0.04079400 | 0.04116800 |
| 0.02998300 | 0.02999200 | 0.02995200 | 0.02995200 | 0.02994500 | 0.02991700 | 0.03001300 | 0.03035400 | 0.03082900 | 0.03124000 | 0.03152600 | 0.03174800 | 0.03199100 | 0.03235300 |
| 0.04852700 | 0.04851800 | 0.04877100 | 0.04909700 | 0.04921400 | 0.04915800 | 0.04922200 | 0.04955800 | 0.05001100 | 0.05035500 | 0.05056600 | 0.05075100 | 0.05097800 | 0.05131300 |
| 0.04551100 | 0.04559500 | 0.04569300 | 0.04576700 | 0.04572300 | 0.04562700 | 0.04572000 | 0.04616100 | 0.04679200 | 0.04724600 | 0.04735600 | 0.04733600 | 0.04746300 | 0.04779700 |
| 0.03311600 | 0.03310500 | 0.03320400 | 0.03337300 | 0.03348900 | 0.03353800 | 0.03358500 | 0.03371300 | 0.03395800 | 0.03424500 | 0.03444800 | 0.03449900 | 0.03447500 | 0.03456200 |
| 0.04395000 | 0.04393100 | 0.04416100 | 0.04451300 | 0.04475000 | 0.04482100 | 0.04491900 | 0.04516200 | 0.04544400 | 0.04563500 | 0.04575300 | 0.04591800 | 0.04621000 | 0.04663800 |
| 0.04521000 | 0.04536100 | 0.04545700 | 0.04554800 | 0.04565200 | 0.04575500 | 0.04590800 | 0.04621100 | 0.04665300 | 0.04704600 | 0.04725500 | 0.04736100 | 0.04751100 | 0.04774800 |
| 0.03576800 | 0.03587500 | 0.03599100 | 0.03609800 | 0.03611300 | 0.03608000 | 0.03619800 | 0.03652900 | 0.03692500 | 0.03723700 | 0.03744600 | 0.03759600 | 0.03772400 | 0.03789100 |
| 0.03501200 | 0.03500700 | 0.03518600 | 0.03547000 | 0.03565700 | 0.03571600 | 0.03579200 | 0.03601400 | 0.03640400 | 0.03685500 | 0.03722500 | 0.03750700 | 0.03780000 | 0.03816000 |
| 0.04004500 | 0.04009400 | 0.04006400 | 0.04010400 | 0.04025300 | 0.04040400 | 0.04049700 | 0.04062800 | 0.04087700 | 0.04115100 | 0.04138000 | 0.04163600 | 0.04194200 | 0.04223200 |
| 0.04783600 | 0.04764900 | 0.04751500 | 0.04762400 | 0.04781600 | 0.04794900 | 0.04816200 | 0.04857900 | 0.04904600 | 0.04933000 | 0.04942300 | 0.04952700 | 0.04978200 | 0.05016300 |
| 0.03604000 | 0.03608100 | 0.03625400 | 0.03643400 | 0.03645200 | 0.03638900 | 0.03652100 | 0.03692000 | 0.03738400 | 0.03774000 | 0.03798600 | 0.03822400 | 0.03854800 | 0.03890900 |
| 0.03447700 | 0.03450900 | 0.03456200 | 0.03464600 | 0.03470600 | 0.03475600 | 0.03492200 | 0.03529200 | 0.03570600 | 0.03590100 | 0.03587400 | 0.03587300 | 0.03607900 | 0.03645900 |
| 0.02448000 | 0.02442300 | 0.02442200 | 0.02453000 | 0.02464200 | 0.02465200 | 0.02460500 | 0.02465800 | 0.02485500 | 0.02508100 | 0.02526600 | 0.02544700 | 0.02564100 | 0.02579600 |
| 0.02611700 | 0.02601600 | 0.02592500 | 0.02592400 | 0.02594500 | 0.02594700 | 0.02602200 | 0.02623700 | 0.02653000 | 0.02676600 | 0.02687800 | 0.02693600 | 0.02706700 | 0.02733100 |
| 0.03077900 | 0.03071200 | 0.03070200 | 0.03081500 | 0.03095200 | 0.03100300 | 0.03104000 | 0.03121900 | 0.03154400 | 0.03184100 | 0.03198600 | 0.03203600 | 0.03213400 | 0.03238700 |

| 7750       | 7752       | 7754       | 7756       | 7758       | 7760       | 7762       | 7763       | 7765       | 7767       | 7769       | 7771       | 7773       | 7775       |
|------------|------------|------------|------------|------------|------------|------------|------------|------------|------------|------------|------------|------------|------------|
| 0.04162700 | 0.04209800 | 0.04248500 | 0.04285000 | 0.04322200 | 0.04343600 | 0.04337000 | 0.04311500 | 0.04282800 | 0.04261400 | 0.04252800 | 0.04252400 | 0.04246500 | 0.04227400 |
| 0.03287500 | 0.03347200 | 0.03401000 | 0.03445000 | 0.03479500 | 0.03492000 | 0.03471600 | 0.03431600 | 0.03394700 | 0.03371400 | 0.03361000 | 0.03354500 | 0.03341500 | 0.03321600 |
| 0.05183500 | 0.05245900 | 0.05300900 | 0.05344000 | 0.05375100 | 0.05383300 | 0.05367000 | 0.05343900 | 0.05327700 | 0.05316500 | 0.05309100 | 0.05305200 | 0.05294100 | 0.05269000 |
| 0.04827900 | 0.04884100 | 0.04937900 | 0.04984300 | 0.05023900 | 0.05047400 | 0.05040900 | 0.05009000 | 0.04972900 | 0.04949500 | 0.04940900 | 0.04932700 | 0.04908200 | 0.04874600 |
| 0.03483500 | 0.03518800 | 0.03550500 | 0.03575200 | 0.03593900 | 0.03604800 | 0.03605000 | 0.03596200 | 0.03580300 | 0.03560600 | 0.03549300 | 0.03547800 | 0.03541900 | 0.03530700 |
| 0.04716900 | 0.04770000 | 0.04806700 | 0.04823300 | 0.04833100 | 0.04843100 | 0.04843700 | 0.04829600 | 0.04810900 | 0.04803200 | 0.04811900 | 0.04820700 | 0.04809900 | 0.04784200 |
| 0.04809300 | 0.04861500 | 0.04928000 | 0.04989900 | 0.05029100 | 0.05038200 | 0.05019000 | 0.04983400 | 0.04946300 | 0.04920200 | 0.04914500 | 0.04922100 | 0.04918100 | 0.04891200 |
| 0.03818500 | 0.03858900 | 0.03896800 | 0.03927700 | 0.03957700 | 0.03981500 | 0.03983800 | 0.03964100 | 0.03940400 | 0.03927000 | 0.03923900 | 0.03923900 | 0.03917300 | 0.03899500 |
| 0.03855300 | 0.03891600 | 0.03923500 | 0.03957700 | 0.03993400 | 0.04009800 | 0.03994900 | 0.03968400 | 0.03951900 | 0.03943300 | 0.03933500 | 0.03919000 | 0.03897400 | 0.03870800 |
| 0.04253000 | 0.04291200 | 0.04335700 | 0.04377400 | 0.04408600 | 0.04420600 | 0.04410200 | 0.04389600 | 0.04375100 | 0.04369900 | 0.04367100 | 0.04359700 | 0.04341100 | 0.04312700 |
| 0.05061500 | 0.05110300 | 0.05155000 | 0.05187300 | 0.05209400 | 0.05225400 | 0.05228100 | 0.05213300 | 0.05187900 | 0.05161800 | 0.05144300 | 0.05133500 | 0.05115900 | 0.05089600 |
| 0.03922800 | 0.03954400 | 0.03990900 | 0.04027000 | 0.04054600 | 0.04068700 | 0.04067700 | 0.04053600 | 0.04030200 | 0.04005100 | 0.03992200 | 0.03992500 | 0.03988100 | 0.03969400 |
| 0.03692100 | 0.03743100 | 0.03792600 | 0.03828400 | 0.03846900 | 0.03853900 | 0.03851700 | 0.03838900 | 0.03817000 | 0.03793500 | 0.03778400 | 0.03767900 | 0.03747500 | 0.03720100 |
| 0.02588300 | 0.02595000 | 0.02607900 | 0.02631700 | 0.02661200 | 0.02684300 | 0.02692800 | 0.02685700 | 0.02665900 | 0.02643700 | 0.02633600 | 0.02635800 | 0.02636500 | 0.02629000 |
| 0.02766600 | 0.02795800 | 0.02815900 | 0.02832200 | 0.02849400 | 0.02861900 | 0.02862800 | 0.02852400 | 0.02833500 | 0.02814600 | 0.02809100 | 0.02813600 | 0.02807300 | 0.02784500 |
| 0.03280800 | 0.03327000 | 0.03359600 | 0.03377100 | 0.03391800 | 0.03402700 | 0.03394900 | 0.03368000 | 0.03340100 | 0.03328000 | 0.03337800 | 0.03358900 | 0.03365800 | 0.03347900 |

| 7777       | 7779       | 7781       | 7783       | 7785       | 7787       | 7789       | 7790       | 7792       | 7794       | 7796       | 7798       | 7800       | 7802       |
|------------|------------|------------|------------|------------|------------|------------|------------|------------|------------|------------|------------|------------|------------|
| 0.04204400 | 0.04193000 | 0.04197500 | 0.04206100 | 0.04205200 | 0.04195600 | 0.04187700 | 0.04185500 | 0.04191500 | 0.04208600 | 0.04221000 | 0.04201500 | 0.04150100 | 0.04091800 |
| 0.03306000 | 0.03310500 | 0.03336800 | 0.03362100 | 0.03365600 | 0.03355200 | 0.03348700 | 0.03348400 | 0.03352200 | 0.03363500 | 0.03368500 | 0.03339900 | 0.03281400 | 0.03225400 |
| 0.05242700 | 0.05236200 | 0.05252000 | 0.05266600 | 0.05263500 | 0.05253500 | 0.05250000 | 0.05250400 | 0.05250300 | 0.05254300 | 0.05262600 | 0.05260200 | 0.05235900 | 0.05197600 |
| 0.04857200 | 0.04865900 | 0.04882000 | 0.04883700 | 0.04875700 | 0.04873800 | 0.04873100 | 0.04864300 | 0.04860600 | 0.04876100 | 0.04893700 | 0.04886800 | 0.04855600 | 0.04814600 |
| 0.03527000 | 0.03533500 | 0.03543700 | 0.03550900 | 0.03548000 | 0.03536900 | 0.03532000 | 0.03539500 | 0.03549500 | 0.03556000 | 0.03560600 | 0.03555800 | 0.03532100 | 0.03493200 |
| 0.04764500 | 0.04762100 | 0.04771200 | 0.04779400 | 0.04780400 | 0.04775700 | 0.04767900 | 0.04758900 | 0.04755600 | 0.04767700 | 0.04784500 | 0.04776500 | 0.04734600 | 0.04675800 |
| 0.04860500 | 0.04855500 | 0.04881600 | 0.04907800 | 0.04907300 | 0.04894300 | 0.04889900 | 0.04889100 | 0.04886500 | 0.04887800 | 0.04889900 | 0.04882200 | 0.04861100 | 0.04828800 |
| 0.03880400 | 0.03878100 | 0.03898700 | 0.03924200 | 0.03930000 | 0.03913000 | 0.03890400 | 0.03875300 | 0.03867700 | 0.03864300 | 0.03862100 | 0.03852100 | 0.03830100 | 0.03803100 |
| 0.03851700 | 0.03854900 | 0.03878000 | 0.03899800 | 0.03903400 | 0.03891700 | 0.03878300 | 0.03876900 | 0.03892000 | 0.03908200 | 0.03901500 | 0.03864900 | 0.03817000 | 0.03773500 |
| 0.04294700 | 0.04303300 | 0.04327300 | 0.04346800 | 0.04353400 | 0.04345300 | 0.04325200 | 0.04304600 | 0.04301300 | 0.04322600 | 0.04349500 | 0.04350200 | 0.04318700 | 0.04274700 |
| 0.05067900 | 0.05063000 | 0.05078600 | 0.05102800 | 0.05117900 | 0.05119100 | 0.05109800 | 0.05095000 | 0.05083900 | 0.05084000 | 0.05091600 | 0.05090700 | 0.05068700 | 0.05030600 |
| 0.03948100 | 0.03942300 | 0.03954300 | 0.03965600 | 0.03964800 | 0.03962600 | 0.03967200 | 0.03971600 | 0.03974100 | 0.03982200 | 0.03989900 | 0.03978100 | 0.03943300 | 0.03897000 |
| 0.03707400 | 0.03719900 | 0.03744500 | 0.03761500 | 0.03767000 | 0.03769400 | 0.03770100 | 0.03763700 | 0.03756300 | 0.03759800 | 0.03769800 | 0.03768600 | 0.03744200 | 0.03697500 |
| 0.02618500 | 0.02612700 | 0.02613800 | 0.02617600 | 0.02623400 | 0.02633200 | 0.02639500 | 0.02633500 | 0.02623400 | 0.02621700 | 0.02625100 | 0.02620900 | 0.02604400 | 0.02583200 |
| 0.02767400 | 0.02774900 | 0.02797300 | 0.02814000 | 0.02817000 | 0.02810700 | 0.02800700 | 0.02792500 | 0.02790900 | 0.02795400 | 0.02798600 | 0.02791700 | 0.02777800 | 0.02766000 |
| 0.03324000 | 0.03320600 | 0.03339900 | 0.03353900 | 0.03341100 | 0.03316500 | 0.03304500 | 0.03309600 | 0.03322700 | 0.03333100 | 0.03331200 | 0.03315800 | 0.03296900 | 0.03280700 |

| 7804       | 7806       | 7808       | 7810       | 7812       | 7814       | 7816       | 7817       | 7819       | 7821       | 7823       | 7825       | 7827       | 7829       |
|------------|------------|------------|------------|------------|------------|------------|------------|------------|------------|------------|------------|------------|------------|
| 0.04040900 | 0.04000400 | 0.03975900 | 0.03965300 | 0.03954500 | 0.03937700 | 0.03923600 | 0.03918000 | 0.03918300 | 0.03921400 | 0.03927000 | 0.03940300 | 0.03964500 | 0.03995100 |
| 0.03184800 | 0.03153700 | 0.03131700 | 0.03115100 | 0.03091900 | 0.03061200 | 0.03035900 | 0.03028200 | 0.03042000 | 0.03068200 | 0.03088800 | 0.03098300 | 0.03108000 | 0.03124600 |
| 0.05151500 | 0.05094900 | 0.05038900 | 0.05002900 | 0.04983800 | 0.04963600 | 0.04940600 | 0.04925900 | 0.04921000 | 0.04927100 | 0.04948500 | 0.04975800 | 0.04998000 | 0.05025000 |
| 0.04767800 | 0.04721900 | 0.04691300 | 0.04677800 | 0.04668300 | 0.04651700 | 0.04630200 | 0.04617100 | 0.04618600 | 0.04627800 | 0.04639100 | 0.04653600 | 0.04674300 | 0.04703700 |
| 0.03446300 | 0.03402200 | 0.03380300 | 0.03386800 | 0.03400200 | 0.03399400 | 0.03389500 | 0.03386700 | 0.03393700 | 0.03400300 | 0.03398100 | 0.03391400 | 0.03392200 | 0.03407500 |
| 0.04614700 | 0.04561900 | 0.04527900 | 0.04512900 | 0.04507100 | 0.04499700 | 0.04488400 | 0.04479000 | 0.04477000 | 0.04479300 | 0.04482500 | 0.04493400 | 0.04520400 | 0.04564300 |
| 0.04785900 | 0.04735500 | 0.04689700 | 0.04659800 | 0.04641600 | 0.04620500 | 0.04591100 | 0.04567600 | 0.04570400 | 0.04599500 | 0.04629700 | 0.04645800 | 0.04662200 | 0.04694700 |
| 0.03775500 | 0.03748800 | 0.03729100 | 0.03718000 | 0.03709700 | 0.03701900 | 0.03695500 | 0.03686400 | 0.03669600 | 0.03649500 | 0.03635200 | 0.03635200 | 0.03655200 | 0.03690600 |
| 0.03731100 | 0.03690900 | 0.03663700 | 0.03649300 | 0.03636900 | 0.03619000 | 0.03599100 | 0.03591300 | 0.03600600 | 0.03612300 | 0.03617500 | 0.03624200 | 0.03640700 | 0.03670800 |
| 0.04224500 | 0.04167600 | 0.04121000 | 0.04097200 | 0.04087700 | 0.04081300 | 0.04073800 | 0.04068200 | 0.04072000 | 0.04082000 | 0.04086100 | 0.04086200 | 0.04097100 | 0.04128700 |
| 0.04985300 | 0.04936900 | 0.04896400 | 0.04875300 | 0.04866000 | 0.04850300 | 0.04823300 | 0.04799700 | 0.04794900 | 0.04807500 | 0.04828100 | 0.04852100 | 0.04877700 | 0.04907000 |
| 0.03843300 | 0.03789300 | 0.03752800 | 0.03735200 | 0.03716900 | 0.03690200 | 0.03669300 | 0.03665600 | 0.03674000 | 0.03686300 | 0.03699500 | 0.03714500 | 0.03735500 | 0.03763600 |
| 0.03639500 | 0.03589300 | 0.03561500 | 0.03549800 | 0.03537400 | 0.03518200 | 0.03499600 | 0.03493000 | 0.03498800 | 0.03503500 | 0.03503000 | 0.03511700 | 0.03538200 | 0.03577200 |
| 0.02568500 | 0.02564200 | 0.02561300 | 0.02551000 | 0.02534700 | 0.02517800 | 0.02503800 | 0.02494500 | 0.02489000 | 0.02488400 | 0.02500300 | 0.02524500 | 0.02542600 | 0.02546500 |
| 0.02749300 | 0.02720000 | 0.02691500 | 0.02676600 | 0.02670000 | 0.02664000 | 0.02658400 | 0.02655900 | 0.02655900 | 0.02655000 | 0.02655900 | 0.02664700 | 0.02678200 | 0.02691400 |
| 0.03259200 | 0.03228500 | 0.03200000 | 0.03181700 | 0.03166200 | 0.03145100 | 0.03123200 | 0.03108900 | 0.03104800 | 0.03113100 | 0.03133900 | 0.03157400 | 0.03174700 | 0.03191400 |

| 7831       | 7833       | 7835       | 7837       | 7839       | 7841       | 7843       | 7844       | 7846       | 7848       | 7850       | 7852       | 7854       | 7856       |
|------------|------------|------------|------------|------------|------------|------------|------------|------------|------------|------------|------------|------------|------------|
| 0.04033000 | 0.04084800 | 0.04146200 | 0.04206500 | 0.04257700 | 0.04289900 | 0.04301000 | 0.04307300 | 0.04326800 | 0.04365300 | 0.04420800 | 0.04484500 | 0.04551000 | 0.04633600 |
| 0.03150000 | 0.03187300 | 0.03236700 | 0.03298500 | 0.03362700 | 0.03405700 | 0.03421900 | 0.03438700 | 0.03480700 | 0.03537900 | 0.03589200 | 0.03639900 | 0.03710200 | 0.03806100 |
| 0.05073200 | 0.05136600 | 0.05197100 | 0.05252800 | 0.05306900 | 0.05342000 | 0.05349600 | 0.05360100 | 0.05406100 | 0.05474600 | 0.05526800 | 0.05557900 | 0.05609700 | 0.05714100 |
| 0.04738400 | 0.04772100 | 0.04806900 | 0.04853300 | 0.04909100 | 0.04948000 | 0.04955500 | 0.04962200 | 0.05001500 | 0.05064200 | 0.05128300 | 0.05193600 | 0.05268200 | 0.05356500 |
| 0.03433600 | 0.03460600 | 0.03485600 | 0.03515400 | 0.03548400 | 0.03567100 | 0.03571400 | 0.03593000 | 0.03646700 | 0.03703600 | 0.03736700 | 0.03755200 | 0.03781600 | 0.03829100 |
| 0.04625200 | 0.04693200 | 0.04748000 | 0.04785800 | 0.04816200 | 0.04835100 | 0.04840200 | 0.04857400 | 0.04911600 | 0.04989100 | 0.05056500 | 0.05106100 | 0.05157700 | 0.05225300 |
| 0.04738500 | 0.04779800 | 0.04816800 | 0.04861400 | 0.04915700 | 0.04959800 | 0.04981400 | 0.04999600 | 0.05043800 | 0.05112200 | 0.05172200 | 0.05211500 | 0.05258900 | 0.05344200 |
| 0.03732100 | 0.03775500 | 0.03821700 | 0.03875100 | 0.03935200 | 0.03979700 | 0.03988100 | 0.03980500 | 0.03997400 | 0.04049400 | 0.04116200 | 0.04184100 | 0.04253900 | 0.04326900 |
| 0.03718000 | 0.03777000 | 0.03835200 | 0.03888100 | 0.03933900 | 0.03963400 | 0.03980500 | 0.04010200 | 0.04064000 | 0.04124800 | 0.04176000 | 0.04224700 | 0.04287400 | 0.04369500 |
| 0.04178000 | 0.04230100 | 0.04273200 | 0.04313100 | 0.04353900 | 0.04383500 | 0.04397900 | 0.04414300 | 0.04448300 | 0.04500900 | 0.04562800 | 0.04622500 | 0.04680800 | 0.04755000 |
| 0.04947800 | 0.05000000 | 0.05051800 | 0.05100000 | 0.05145600 | 0.05174600 | 0.05181300 | 0.05194800 | 0.05241400 | 0.05304600 | 0.05357100 | 0.05404800 | 0.05469900 | 0.05557900 |
| 0.03793800 | 0.03828500 | 0.03874400 | 0.03930700 | 0.03990200 | 0.04040400 | 0.04068900 | 0.04083800 | 0.04112800 | 0.04172600 | 0.04250500 | 0.04317700 | 0.04361100 | 0.04405400 |
| 0.03625800 | 0.03679900 | 0.03726700 | 0.03767100 | 0.03808300 | 0.03834100 | 0.03833700 | 0.03836700 | 0.03874400 | 0.03936700 | 0.03996100 | 0.04048900 | 0.04112300 | 0.04196700 |
| 0.02555500 | 0.02582500 | 0.02615000 | 0.02639500 | 0.02655000 | 0.02662500 | 0.02665500 | 0.02678600 | 0.02711100 | 0.02750100 | 0.02780000 | 0.02801700 | 0.02824600 | 0.02862300 |
| 0.02708900 | 0.02733600 | 0.02761200 | 0.02794600 | 0.02831800 | 0.02852900 | 0.02852200 | 0.02856000 | 0.02884500 | 0.02925300 | 0.02958400 | 0.02981900 | 0.03009800 | 0.03057800 |
| 0.03215400 | 0.03245700 | 0.03281600 | 0.03328600 | 0.03379200 | 0.03406900 | 0.03404200 | 0.03403400 | 0.03433800 | 0.03484800 | 0.03531300 | 0.03569600 | 0.03611800 | 0.03666600 |

| 7858       | 7860       | 7862       | 7864       | 7866       | 7868       | 7870       | 7871       | 7873       | 7875       | 7877       | 7879       | 7881       | 7883       |
|------------|------------|------------|------------|------------|------------|------------|------------|------------|------------|------------|------------|------------|------------|
| 0.04744200 | 0.04880900 | 0.05048400 | 0.05245500 | 0.05446200 | 0.05625300 | 0.05761700 | 0.05823100 | 0.05790800 | 0.05675900 | 0.05502600 | 0.05299600 | 0.05098300 | 0.04921500 |
| 0.03921100 | 0.04054200 | 0.04216100 | 0.04409200 | 0.04609700 | 0.04785200 | 0.04914000 | 0.04977600 | 0.04956900 | 0.04849100 | 0.04674700 | 0.04467300 | 0.04263100 | 0.04087100 |
| 0.05852900 | 0.05999500 | 0.06166600 | 0.06370200 | 0.06584800 | 0.06768200 | 0.06894500 | 0.06949500 | 0.06922200 | 0.06810100 | 0.06632100 | 0.06426000 | 0.06227700 | 0.06053100 |
| 0.05467100 | 0.05608500 | 0.05778000 | 0.05963900 | 0.06153600 | 0.06328500 | 0.06453000 | 0.06495200 | 0.06453200 | 0.06344000 | 0.06182400 | 0.05985700 | 0.05784200 | 0.05610300 |
| 0.03898600 | 0.03979700 | 0.04064900 | 0.04160800 | 0.04273700 | 0.04387200 | 0.04468900 | 0.04500100 | 0.04485400 | 0.04429600 | 0.04333000 | 0.04212000 | 0.04099300 | 0.04012200 |
| 0.05313500 | 0.05431100 | 0.05589700 | 0.05788800 | 0.06003300 | 0.06191200 | 0.06320500 | 0.06379300 | 0.06361300 | 0.06260000 | 0.06087900 | 0.05880400 | 0.05675700 | 0.05496300 |
| 0.05467800 | 0.05617200 | 0.05787300 | 0.05975500 | 0.06169200 | 0.06345400 | 0.06479200 | 0.06548400 | 0.06533800 | 0.06428800 | 0.06255200 | 0.06050800 | 0.05850000 | 0.05674900 |
| 0.04405100 | 0.04500100 | 0.04631800 | 0.04805800 | 0.04995200 | 0.05159300 | 0.05265600 | 0.05300500 | 0.05272300 | 0.05188800 | 0.05049200 | 0.04870500 | 0.04689400 | 0.04526700 |
| 0.04471300 | 0.04600900 | 0.04772300 | 0.04986600 | 0.05216100 | 0.05413600 | 0.05539300 | 0.05581000 | 0.05547200 | 0.05446300 | 0.05288500 | 0.05095100 | 0.04893700 | 0.04704800 |
| 0.04859500 | 0.04988200 | 0.05130500 | 0.05291700 | 0.05471500 | 0.05637600 | 0.05749900 | 0.05792600 | 0.05769500 | 0.05683900 | 0.05537600 | 0.05350800 | 0.05167900 | 0.05025100 |
| 0.05663400 | 0.05791200 | 0.05956700 | 0.06161400 | 0.06376600 | 0.06561700 | 0.06681800 | 0.06716100 | 0.06668000 | 0.06557900 | 0.06403100 | 0.06220300 | 0.06033900 | 0.05862600 |
| 0.04488100 | 0.04622000 | 0.04799100 | 0.05003400 | 0.05208900 | 0.05388300 | 0.05518100 | 0.05572500 | 0.05534400 | 0.05415300 | 0.05249400 | 0.05065000 | 0.04874300 | 0.04690200 |
| 0.04297600 | 0.04413900 | 0.04556600 | 0.04727600 | 0.04905700 | 0.05063700 | 0.05177000 | 0.05222000 | 0.05191800 | 0.05098100 | 0.04956500 | 0.04787800 | 0.04618400 | 0.04465000 |
| 0.02924500 | 0.03005700 | 0.03096800 | 0.03196800 | 0.03296600 | 0.03376500 | 0.03424500 | 0.03438200 | 0.03416600 | 0.03362000 | 0.03283700 | 0.03192300 | 0.03099500 | 0.03017500 |
| 0.03130100 | 0.03219300 | 0.03319100 | 0.03422600 | 0.03518500 | 0.03601300 | 0.03666200 | 0.03699400 | 0.03690000 | 0.03642800 | 0.03567600 | 0.03470200 | 0.03363600 | 0.03265900 |
| 0.03736700 | 0.03821700 | 0.03926100 | 0.04056400 | 0.04198800 | 0.04324400 | 0.04418500 | 0.04476500 | 0.04482200 | 0.04421200 | 0.04305300 | 0.04167400 | 0.04038500 | 0.03927400 |



| 7885       | 7887       | 7889       | 7891       | 7893       | 7895       | 7896       | 7898       | 7900       | 7902       | 7904       | 7906       | 7908       | 7910       |
|------------|------------|------------|------------|------------|------------|------------|------------|------------|------------|------------|------------|------------|------------|
| 0.04772200 | 0.04639000 | 0.04519000 | 0.04421100 | 0.04349100 | 0.04303200 | 0.04286400 | 0.04287400 | 0.04281100 | 0.04257600 | 0.04223800 | 0.04186700 | 0.04153100 | 0.04133400 |
| 0.03935200 | 0.03791300 | 0.03657500 | 0.03549700 | 0.03476300 | 0.03431000 | 0.03402900 | 0.03382700 | 0.03360500 | 0.03334400 | 0.03313700 | 0.03303500 | 0.03297300 | 0.03289600 |
| 0.05893800 | 0.05740500 | 0.05607700 | 0.05511700 | 0.05439800 | 0.05372900 | 0.05316600 | 0.05281700 | 0.05263300 | 0.05251500 | 0.05240300 | 0.05225600 | 0.05207200 | 0.05192000 |
| 0.05468200 | 0.05337300 | 0.05216100 | 0.05123100 | 0.05059200 | 0.05008100 | 0.04962900 | 0.04928200 | 0.04907000 | 0.04895000 | 0.04886500 | 0.04878700 | 0.04869800 | 0.04862700 |
| 0.03936300 | 0.03850400 | 0.03756700 | 0.03678700 | 0.03633600 | 0.03613100 | 0.03601900 | 0.03592800 | 0.03579200 | 0.03560200 | 0.03544100 | 0.03539500 | 0.03543900 | 0.03543100 |
| 0.05343100 | 0.05206000 | 0.05085600 | 0.04996000 | 0.04938000 | 0.04892800 | 0.04850100 | 0.04813400 | 0.04780800 | 0.04753600 | 0.04738900 | 0.04732000 | 0.04725300 | 0.04719600 |
| 0.05524500 | 0.05381200 | 0.05241300 | 0.05124600 | 0.05049800 | 0.05014100 | 0.05002700 | 0.04998200 | 0.04980200 | 0.04942600 | 0.04902900 | 0.04875300 | 0.04858000 | 0.04849100 |
| 0.04378900 | 0.04248000 | 0.04147800 | 0.04077400 | 0.04019400 | 0.03967700 | 0.03934100 | 0.03923300 | 0.03919200 | 0.03908600 | 0.03902000 | 0.03909700 | 0.03916300 | 0.03899900 |
| 0.04533800 | 0.04376800 | 0.04234300 | 0.04114500 | 0.04028300 | 0.03979800 | 0.03961000 | 0.03952300 | 0.03935600 | 0.03912100 | 0.03895200 | 0.03887800 | 0.03882900 | 0.03874500 |
| 0.04914100 | 0.04801900 | 0.04682200 | 0.04578700 | 0.04508700 | 0.04467200 | 0.04439300 | 0.04414800 | 0.04392800 | 0.04375700 | 0.04359700 | 0.04337200 | 0.04310000 | 0.04290900 |
| 0.05705800 | 0.05556100 | 0.05419900 | 0.05314200 | 0.05242400 | 0.05195400 | 0.05171100 | 0.05163300 | 0.05151400 | 0.05128200 | 0.05107100 | 0.05093100 | 0.05083100 | 0.05081700 |
| 0.04526400 | 0.04384000 | 0.04261200 | 0.04166300 | 0.04100800 | 0.04049800 | 0.04006400 | 0.03980000 | 0.03971500 | 0.03971600 | 0.03972200 | 0.03961700 | 0.03934200 | 0.03906400 |
| 0.04326200 | 0.04194300 | 0.04073700 | 0.03978600 | 0.03913700 | 0.03867900 | 0.03831300 | 0.03805300 | 0.03787700 | 0.03771900 | 0.03763300 | 0.03767600 | 0.03772300 | 0.03763200 |
| 0.02946100 | 0.02880700 | 0.02825700 | 0.02781500 | 0.02742100 | 0.02711200 | 0.02694000 | 0.02683900 | 0.02672600 | 0.02660000 | 0.02651600 | 0.02652100 | 0.02656200 | 0.02652300 |
| 0.03177500 | 0.03085500 | 0.02996300 | 0.02931800 | 0.02895600 | 0.02874300 | 0.02865200 | 0.02872000 | 0.02884100 | 0.02886000 | 0.02877600 | 0.02868400 | 0.02858000 | 0.02840200 |
| 0.03822100 | 0.03714600 | 0.03614800 | 0.03537400 | 0.03483800 | 0.03446600 | 0.03422000 | 0.03405200 | 0.03388900 | 0.03372800 | 0.03361200 | 0.03357200 | 0.03358500 | 0.03355700 |

| 7912       | 7914       | 7916       | 7918       | 7920       | 7922       | 7923       | 7925       | 7927       | 7929       | 7931       | 7933       | 7935       | 7937       |
|------------|------------|------------|------------|------------|------------|------------|------------|------------|------------|------------|------------|------------|------------|
| 0.04131000 | 0.04134000 | 0.04127900 | 0.04115600 | 0.04110600 | 0.04118000 | 0.04130200 | 0.04131500 | 0.04117600 | 0.04110100 | 0.04124300 | 0.04141200 | 0.04138800 | 0.04119600 |
| 0.03283000 | 0.03281500 | 0.03285800 | 0.03291400 | 0.03290100 | 0.03280100 | 0.03267700 | 0.03255500 | 0.03242800 | 0.03238500 | 0.03250500 | 0.03267500 | 0.03270000 | 0.03257700 |
| 0.05191500 | 0.05205400 | 0.05217100 | 0.05215200 | 0.05207700 | 0.05206900 | 0.05211300 | 0.05204000 | 0.05178200 | 0.05153200 | 0.05151400 | 0.05170600 | 0.05188000 | 0.05186900 |
| 0.04865500 | 0.04873500 | 0.04871800 | 0.04855900 | 0.04838100 | 0.04833200 | 0.04841100 | 0.04843500 | 0.04829100 | 0.04814300 | 0.04821000 | 0.04842900 | 0.04858300 | 0.04859700 |
| 0.03533200 | 0.03526000 | 0.03527200 | 0.03531600 | 0.03535100 | 0.03533100 | 0.03523400 | 0.03508700 | 0.03494900 | 0.03491900 | 0.03507500 | 0.03535700 | 0.03558100 | 0.03561500 |
| 0.04715600 | 0.04710800 | 0.04705400 | 0.04704000 | 0.04709100 | 0.04715800 | 0.04718200 | 0.04712800 | 0.04701000 | 0.04691900 | 0.04691700 | 0.04696300 | 0.04697300 | 0.04690100 |
| 0.04851400 | 0.04862300 | 0.04871500 | 0.04869600 | 0.04860800 | 0.04858300 | 0.04860900 | 0.04849500 | 0.04819500 | 0.04792400 | 0.04787900 | 0.04804900 | 0.04828700 | 0.04843000 |
| 0.03866000 | 0.03838000 | 0.03826200 | 0.03824300 | 0.03826000 | 0.03829900 | 0.03831100 | 0.03822500 | 0.03807300 | 0.03800400 | 0.03812600 | 0.03836500 | 0.03849100 | 0.03843500 |
| 0.03864800 | 0.03861500 | 0.03861400 | 0.03850500 | 0.03831400 | 0.03823200 | 0.03826100 | 0.03821200 | 0.03807900 | 0.03803600 | 0.03808900 | 0.03809900 | 0.03801100 | 0.03791200 |
| 0.04290300 | 0.04306300 | 0.04328500 | 0.04344600 | 0.04348900 | 0.04343700 | 0.04326500 | 0.04293500 | 0.04260800 | 0.04249100 | 0.04255400 | 0.04266600 | 0.04277500 | 0.04282000 |
| 0.05089400 | 0.05094000 | 0.05087900 | 0.05075800 | 0.05065500 | 0.05063400 | 0.05068800 | 0.05068900 | 0.05054000 | 0.05033100 | 0.05024500 | 0.05038000 | 0.05064800 | 0.05082000 |
| 0.03899600 | 0.03911700 | 0.03922400 | 0.03918300 | 0.03907200 | 0.03905600 | 0.03913700 | 0.03914400 | 0.03902800 | 0.03896500 | 0.03908200 | 0.03926900 | 0.03929700 | 0.03907700 |
| 0.03748100 | 0.03745400 | 0.03754100 | 0.03750200 | 0.03725000 | 0.03705000 | 0.03710200 | 0.03720100 | 0.03715700 | 0.03715100 | 0.03736800 | 0.03763500 | 0.03764300 | 0.03738200 |
| 0.02636700 | 0.02617300 | 0.02601700 | 0.02593100 | 0.02597100 | 0.02614700 | 0.02633500 | 0.02638700 | 0.02631600 | 0.02626000 | 0.02628600 | 0.02636100 | 0.02643100 | 0.02642600 |
| 0.02820300 | 0.02809700 | 0.02808800 | 0.02811100 | 0.02812400 | 0.02809800 | 0.02800600 | 0.02788300 | 0.02782200 | 0.02789400 | 0.02807100 | 0.02822000 | 0.02820300 | 0.02804600 |
| 0.03343200 | 0.03330100 | 0.03325800 | 0.03326700 | 0.03329400 | 0.03332200 | 0.03324900 | 0.03303100 | 0.03277600 | 0.03261500 | 0.03264400 | 0.03287300 | 0.03315100 | 0.03330200 |

| 7939       | 7941       | 7943       | 7945       | 7947       | 7949       | 7950       | 7952       | 7954       | 7956       | 7958       | 7960       | 7962       | 7964       |
|------------|------------|------------|------------|------------|------------|------------|------------|------------|------------|------------|------------|------------|------------|
| 0.04100400 | 0.04097000 | 0.04109700 | 0.04126300 | 0.04139700 | 0.04151400 | 0.04162600 | 0.04172400 | 0.04179400 | 0.04183700 | 0.04191200 | 0.04208500 | 0.04232900 | 0.04253200 |
| 0.03250900 | 0.03262800 | 0.03283700 | 0.03296400 | 0.03296700 | 0.03296400 | 0.03307500 | 0.03322400 | 0.03325000 | 0.03318800 | 0.03323800 | 0.03351800 | 0.03394400 | 0.03426600 |
| 0.05174400 | 0.05168700 | 0.05177600 | 0.05198600 | 0.05225800 | 0.05250700 | 0.05262700 | 0.05261200 | 0.05259200 | 0.05265900 | 0.05277700 | 0.05291200 | 0.05310200 | 0.05333600 |
| 0.04852900 | 0.04845100 | 0.04846600 | 0.04862900 | 0.04881200 | 0.04885000 | 0.04878700 | 0.04878300 | 0.04888600 | 0.04903300 | 0.04920500 | 0.04944800 | 0.04974300 | 0.04993000 |
| 0.03548700 | 0.03534600 | 0.03529900 | 0.03533500 | 0.03541400 | 0.03550800 | 0.03558300 | 0.03567000 | 0.03577800 | 0.03582700 | 0.03585000 | 0.03600700 | 0.03631000 | 0.03654200 |
| 0.04679900 | 0.04678000 | 0.04693400 | 0.04721300 | 0.04741800 | 0.04744600 | 0.04742500 | 0.04749600 | 0.04766800 | 0.04787600 | 0.04806300 | 0.04825200 | 0.04847300 | 0.04861900 |
| 0.04842900 | 0.04841900 | 0.04852700 | 0.04872100 | 0.04893300 | 0.04912000 | 0.04921800 | 0.04924200 | 0.04929900 | 0.04942900 | 0.04956800 | 0.04971400 | 0.04991300 | 0.05006000 |
| 0.03841100 | 0.03855400 | 0.03877800 | 0.03902200 | 0.03923700 | 0.03927300 | 0.03910200 | 0.03892100 | 0.03887600 | 0.03893500 | 0.03905000 | 0.03922000 | 0.03943000 | 0.03961100 |
| 0.03796300 | 0.03821800 | 0.03851900 | 0.03869100 | 0.03873200 | 0.03875900 | 0.03884300 | 0.03895500 | 0.03910200 | 0.03933700 | 0.03957300 | 0.03968600 | 0.03972600 | 0.03977100 |
| 0.04279000 | 0.04284000 | 0.04308700 | 0.04342200 | 0.04363400 | 0.04363300 | 0.04354200 | 0.04356900 | 0.04377700 | 0.04404100 | 0.04422500 | 0.04431800 | 0.04442300 | 0.04456000 |
| 0.05075000 | 0.05054400 | 0.05043800 | 0.05054900 | 0.05079300 | 0.05103700 | 0.05124800 | 0.05142200 | 0.05152800 | 0.05158400 | 0.05165200 | 0.05176600 | 0.05190400 | 0.05202200 |
| 0.03881600 | 0.03878200 | 0.03897200 | 0.03920600 | 0.03942500 | 0.03966700 | 0.03986100 | 0.03987200 | 0.03971800 | 0.03959400 | 0.03967200 | 0.03998800 | 0.04041400 | 0.04070000 |
| 0.03717500 | 0.03724600 | 0.03748000 | 0.03770400 | 0.03788100 | 0.03797200 | 0.03791300 | 0.03775600 | 0.03767300 | 0.03775100 | 0.03791300 | 0.03813100 | 0.03843700 | 0.03872000 |
| 0.02631700 | 0.02619100 | 0.02617200 | 0.02628700 | 0.02644200 | 0.02657200 | 0.02671800 | 0.02690800 | 0.02710200 | 0.02721200 | 0.02716100 | 0.02704600 | 0.02708500 | 0.02726800 |
| 0.02790700 | 0.02787800 | 0.02795300 | 0.02812000 | 0.02830700 | 0.02837700 | 0.02827900 | 0.02814000 | 0.02815500 | 0.02838600 | 0.02872100 | 0.02899700 | 0.02910600 | 0.02903400 |
| 0.03334800 | 0.03343000 | 0.03356600 | 0.03362500 | 0.03352200 | 0.03335800 | 0.03334200 | 0.03355600 | 0.03382900 | 0.03392100 | 0.03383400 | 0.03380300 | 0.03394700 | 0.03411400 |

| 7966       | 7968       | 7970       | 7972       | 7974       | 7976       | 7977       | 7979       | 7981       | 7983       | 7985       | 7987       | 7989       | 7991       |
|------------|------------|------------|------------|------------|------------|------------|------------|------------|------------|------------|------------|------------|------------|
| 0.04258900 | 0.04252900 | 0.04250300 | 0.04261000 | 0.04283800 | 0.04312100 | 0.04331400 | 0.04327600 | 0.04306200 | 0.04286200 | 0.04280500 | 0.04293300 | 0.04322400 | 0.04356500 |
| 0.03429900 | 0.03413400 | 0.03400100 | 0.03400700 | 0.03411700 | 0.03427000 | 0.03444800 | 0.03460100 | 0.03465200 | 0.03464900 | 0.03471700 | 0.03488700 | 0.03510800 | 0.03531800 |
| 0.05347400 | 0.05345000 | 0.05341500 | 0.05352500 | 0.05375000 | 0.05401100 | 0.05423600 | 0.05432300 | 0.05421800 | 0.05402600 | 0.05394500 | 0.05410800 | 0.05447300 | 0.05484700 |
| 0.04987900 | 0.04968600 | 0.04963100 | 0.04987300 | 0.05026400 | 0.05054700 | 0.05062100 | 0.05056300 | 0.05050200 | 0.05050100 | 0.05055900 | 0.05066700 | 0.05076500 | 0.05080300 |
| 0.03653900 | 0.03638800 | 0.03625900 | 0.03622700 | 0.03628100 | 0.03635800 | 0.03643100 | 0.03651100 | 0.03652300 | 0.03643600 | 0.03641100 | 0.03656500 | 0.03677600 | 0.03690100 |
| 0.04854900 | 0.04834600 | 0.04824400 | 0.04833000 | 0.04852400 | 0.04872200 | 0.04886400 | 0.04894300 | 0.04896000 | 0.04895100 | 0.04901300 | 0.04922400 | 0.04958400 | 0.04997700 |
| 0.04999300 | 0.04981800 | 0.04978400 | 0.04991400 | 0.05005900 | 0.05017000 | 0.05030200 | 0.05045200 | 0.05056700 | 0.05065400 | 0.05074500 | 0.05090000 | 0.05115200 | 0.05136900 |
| 0.03967700 | 0.03960500 | 0.03946800 | 0.03940900 | 0.03954200 | 0.03982100 | 0.04010800 | 0.04029600 | 0.04031800 | 0.04021000 | 0.04014200 | 0.04024700 | 0.04048200 | 0.04070400 |
| 0.03979900 | 0.03981800 | 0.03988700 | 0.03999500 | 0.04007500 | 0.04011800 | 0.04018700 | 0.04031600 | 0.04044500 | 0.04049200 | 0.04046000 | 0.04046700 | 0.04061700 | 0.04084800 |
| 0.04459800 | 0.04447000 | 0.04433500 | 0.04441300 | 0.04469600 | 0.04496100 | 0.04508700 | 0.04515200 | 0.04520800 | 0.04525200 | 0.04532100 | 0.04543500 | 0.04559400 | 0.04577700 |
| 0.05207600 | 0.05201800 | 0.05187800 | 0.05186300 | 0.05210900 | 0.05247300 | 0.05275700 | 0.05289700 | 0.05291000 | 0.05287200 | 0.05287400 | 0.05294200 | 0.05307400 | 0.05323500 |
| 0.04068200 | 0.04046800 | 0.04029000 | 0.04028000 | 0.04043600 | 0.04068400 | 0.04090700 | 0.04100400 | 0.04096600 | 0.04091300 | 0.04098500 | 0.04119100 | 0.04143300 | 0.04163900 |
| 0.03880800 | 0.03869400 | 0.03854900 | 0.03854000 | 0.03867700 | 0.03889100 | 0.03913800 | 0.03931800 | 0.03931500 | 0.03920300 | 0.03918800 | 0.03933500 | 0.03950700 | 0.03959200 |
| 0.02737400 | 0.02734900 | 0.02732300 | 0.02729800 | 0.02717500 | 0.02704200 | 0.02712600 | 0.02741800 | 0.02764100 | 0.02765500 | 0.02765000 | 0.02781500 | 0.02807100 | 0.02824700 |
| 0.02884800 | 0.02868500 | 0.02868900 | 0.02892700 | 0.02931700 | 0.02963400 | 0.02974700 | 0.02973500 | 0.02966100 | 0.02952700 | 0.02944000 | 0.02949300 | 0.02960400 | 0.02964900 |
| 0.03416200 | 0.03416900 | 0.03422000 | 0.03429700 | 0.03442300 | 0.03461100 | 0.03474400 | 0.03473800 | 0.03469400 | 0.03472900 | 0.03483100 | 0.03495500 | 0.03509200 | 0.03519800 |

| 7993       | 7995       | 7997       | 7999       | 8001       | 8003       | 8004       | 8006       | 8008       | 8010       | 8012       | 8014       | 8016       | 8018       |
|------------|------------|------------|------------|------------|------------|------------|------------|------------|------------|------------|------------|------------|------------|
| 0.04383200 | 0.04398600 | 0.04402600 | 0.04396100 | 0.04389500 | 0.04395700 | 0.04414000 | 0.04435000 | 0.04450700 | 0.04457100 | 0.04459900 | 0.04470300 | 0.04486700 | 0.04496100 |
| 0.03546400 | 0.03550800 | 0.03545000 | 0.03536500 | 0.03535000 | 0.03547000 | 0.03569300 | 0.03587700 | 0.03594700 | 0.03599900 | 0.03614200 | 0.03636900 | 0.03659600 | 0.03676400 |
| 0.05504800 | 0.05508200 | 0.05506900 | 0.05502200 | 0.05490500 | 0.05483400 | 0.05493200 | 0.05515100 | 0.05538800 | 0.05558000 | 0.05569100 | 0.05574600 | 0.05580900 | 0.05591500 |
| 0.05084500 | 0.05095000 | 0.05106700 | 0.05113100 | 0.05116400 | 0.05128300 | 0.05156100 | 0.05184400 | 0.05187500 | 0.05167700 | 0.05161000 | 0.05192900 | 0.05243100 | 0.05274600 |
| 0.03696100 | 0.03699200 | 0.03696200 | 0.03685400 | 0.03674600 | 0.03677100 | 0.03698900 | 0.03726900 | 0.03741800 | 0.03743800 | 0.03749000 | 0.03764100 | 0.03779600 | 0.03788600 |
| 0.05019900 | 0.05017700 | 0.05004600 | 0.04990100 | 0.04976900 | 0.04976200 | 0.04992600 | 0.05014000 | 0.05030500 | 0.05040500 | 0.05049500 | 0.05070700 | 0.05104400 | 0.05129300 |
| 0.05139000 | 0.05126100 | 0.05116400 | 0.05121000 | 0.05136800 | 0.05155600 | 0.05174100 | 0.05189700 | 0.05198300 | 0.05204200 | 0.05217200 | 0.05240200 | 0.05264900 | 0.05277300 |
| 0.04085000 | 0.04096800 | 0.04108200 | 0.04114500 | 0.04114900 | 0.04117200 | 0.04128200 | 0.04142300 | 0.04146500 | 0.04143000 | 0.04151500 | 0.04178700 | 0.04205900 | 0.04216300 |
| 0.04100300 | 0.04105600 | 0.04111400 | 0.04122900 | 0.04133300 | 0.04141900 | 0.04153300 | 0.04160500 | 0.04161000 | 0.04169400 | 0.04194200 | 0.04226100 | 0.04250100 | 0.04259000 |
| 0.04589200 | 0.04586500 | 0.04574900 | 0.04564500 | 0.04560200 | 0.04570200 | 0.04601500 | 0.04639900 | 0.04660500 | 0.04664300 | 0.04672000 | 0.04688800 | 0.04702300 | 0.04707500 |
| 0.05338900 | 0.05355800 | 0.05375600 | 0.05387900 | 0.05383600 | 0.05375700 | 0.05380800 | 0.05393500 | 0.05405000 | 0.05420100 | 0.05439500 | 0.05453700 | 0.05457100 | 0.05452400 |
| 0.04178700 | 0.04189900 | 0.04202700 | 0.04215200 | 0.04218000 | 0.04209700 | 0.04202400 | 0.04209600 | 0.04227500 | 0.04238300 | 0.04239600 | 0.04246400 | 0.04266100 | 0.04293000 |
| 0.03965400 | 0.03980700 | 0.04004200 | 0.04021600 | 0.04022600 | 0.04020300 | 0.04036100 | 0.04065500 | 0.04084500 | 0.04082200 | 0.04069000 | 0.04062100 | 0.04072400 | 0.04093700 |
| 0.02827500 | 0.02818100 | 0.02806200 | 0.02798900 | 0.02792600 | 0.02788000 | 0.02793200 | 0.02806200 | 0.02816100 | 0.02818600 | 0.02818500 | 0.02824300 | 0.02840400 | 0.02858200 |
| 0.02961300 | 0.02958300 | 0.02965500 | 0.02978700 | 0.02983500 | 0.02983900 | 0.02998600 | 0.03020100 | 0.03023000 | 0.03008700 | 0.03000200 | 0.03004400 | 0.03010900 | 0.03019400 |
| 0.03527300 | 0.03537900 | 0.03548100 | 0.03547900 | 0.03538600 | 0.03529300 | 0.03525200 | 0.03530400 | 0.03546300 | 0.03565000 | 0.03578600 | 0.03586600 | 0.03591000 | 0.03598100 |

| 8020       | 8022       | 8024       | 8026       | 8028       | 8030       | 8031       | 8033       | 8035       | 8037       | 8039       | 8041       | 8043       | 8045       |
|------------|------------|------------|------------|------------|------------|------------|------------|------------|------------|------------|------------|------------|------------|
| 0.04496500 | 0.04501800 | 0.04517700 | 0.04535600 | 0.04558300 | 0.04590700 | 0.04616900 | 0.04624800 | 0.04626300 | 0.04633400 | 0.04639800 | 0.04636700 | 0.04632500 | 0.04643300 |
| 0.03692400 | 0.03712900 | 0.03728700 | 0.03731200 | 0.03732800 | 0.03747500 | 0.03767300 | 0.03781200 | 0.03792400 | 0.03802800 | 0.03807400 | 0.03810300 | 0.03819000 | 0.03829500 |
| 0.05610700 | 0.05641500 | 0.05677300 | 0.05704500 | 0.05719300 | 0.05729500 | 0.05736100 | 0.05733800 | 0.05728300 | 0.05734100 | 0.05752600 | 0.05771400 | 0.05784500 | 0.05795100 |
| 0.05279800 | 0.05277700 | 0.05280200 | 0.05281200 | 0.05278700 | 0.05284000 | 0.05301900 | 0.05324000 | 0.05343400 | 0.05360300 | 0.05374300 | 0.05382200 | 0.05388200 | 0.05399800 |
| 0.03799100 | 0.03816500 | 0.03829900 | 0.03831500 | 0.03830900 | 0.03837600 | 0.03844900 | 0.03842900 | 0.03837300 | 0.03840700 | 0.03851600 | 0.03861500 | 0.03867900 | 0.03867200 |
| 0.05132900 | 0.05129100 | 0.05132100 | 0.05140100 | 0.05153300 | 0.05175300 | 0.05193100 | 0.05196800 | 0.05203000 | 0.05225800 | 0.05253100 | 0.05268200 | 0.05271600 | 0.05274000 |
| 0.05276500 | 0.05281800 | 0.05304600 | 0.05331700 | 0.05350800 | 0.05359700 | 0.05356000 | 0.05351200 | 0.05367100 | 0.05401200 | 0.05427800 | 0.05435000 | 0.05429700 | 0.05420200 |
| 0.04212900 | 0.04211400 | 0.04222500 | 0.04239300 | 0.04249600 | 0.04259100 | 0.04282900 | 0.04312800 | 0.04325600 | 0.04319300 | 0.04309400 | 0.04303100 | 0.04309600 | 0.04337500 |
| 0.04261800 | 0.04271200 | 0.04287300 | 0.04303400 | 0.04320500 | 0.04342400 | 0.04367000 | 0.04389300 | 0.04405000 | 0.04409500 | 0.04404700 | 0.04403700 | 0.04411000 | 0.04418400 |
| 0.04711300 | 0.04720100 | 0.04735200 | 0.04756100 | 0.04782300 | 0.04807300 | 0.04818400 | 0.04815800 | 0.04813600 | 0.04822700 | 0.04843800 | 0.04861500 | 0.04861000 | 0.04855200 |
| 0.05449200 | 0.05462100 | 0.05497200 | 0.05538700 | 0.05563000 | 0.05565000 | 0.05558000 | 0.05553300 | 0.05556100 | 0.05570600 | 0.05590800 | 0.05601700 | 0.05601500 | 0.05607700 |
| 0.04319100 | 0.04335000 | 0.04339200 | 0.04345700 | 0.04365500 | 0.04390800 | 0.04409200 | 0.04418100 | 0.04420700 | 0.04420000 | 0.04419500 | 0.04425100 | 0.04440300 | 0.04457100 |
| 0.04108800 | 0.04112900 | 0.04117900 | 0.04135800 | 0.04164800 | 0.04192300 | 0.04209700 | 0.04218800 | 0.04225000 | 0.04231100 | 0.04234100 | 0.04231100 | 0.04229400 | 0.04237800 |
| 0.02866000 | 0.02866900 | 0.02871400 | 0.02879100 | 0.02886800 | 0.02899100 | 0.02920400 | 0.02944300 | 0.02957800 | 0.02956400 | 0.02948700 | 0.02941800 | 0.02936000 | 0.02937400 |
| 0.03043100 | 0.03078800 | 0.03104000 | 0.03110500 | 0.03110200 | 0.03110900 | 0.03111600 | 0.03114200 | 0.03124400 | 0.03141700 | 0.03158500 | 0.03165900 | 0.03159700 | 0.03147600 |
| 0.03614000 | 0.03631500 | 0.03641100 | 0.03651000 | 0.03673500 | 0.03702200 | 0.03719300 | 0.03719500 | 0.03712600 | 0.03708500 | 0.03708300 | 0.03709700 | 0.03714900 | 0.03727500 |

| 8047       | 8049       | 8051       | 8053       | 8055       | 8057       | 8058       | 8060       | 8062       | 8064       | 8066       | 8068       | 8070       | 8072       |
|------------|------------|------------|------------|------------|------------|------------|------------|------------|------------|------------|------------|------------|------------|
| 0.04668800 | 0.04694000 | 0.04707200 | 0.04710400 | 0.04715400 | 0.04722900 | 0.04724500 | 0.04730000 | 0.04752300 | 0.04774200 | 0.04775300 | 0.04769800 | 0.04780100 | 0.04798500 |
| 0.03840500 | 0.03859000 | 0.03876300 | 0.03874200 | 0.03854500 | 0.03833900 | 0.03829000 | 0.03852100 | 0.03894500 | 0.03928200 | 0.03941700 | 0.03952100 | 0.03970800 | 0.03990100 |
| 0.05804000 | 0.05807200 | 0.05800700 | 0.05789100 | 0.05787600 | 0.05807600 | 0.05842500 | 0.05874900 | 0.05893800 | 0.05898900 | 0.05897300 | 0.05906300 | 0.05939100 | 0.05979100 |
| 0.05415300 | 0.05431000 | 0.05447500 | 0.05460000 | 0.05462900 | 0.05461900 | 0.05467800 | 0.05480600 | 0.05490200 | 0.05491600 | 0.05492700 | 0.05505100 | 0.05526400 | 0.05539700 |
| 0.03860000 | 0.03857400 | 0.03865400 | 0.03877800 | 0.03883600 | 0.03875400 | 0.03864500 | 0.03875900 | 0.03910600 | 0.03937500 | 0.03939000 | 0.03931400 | 0.03929800 | 0.03933000 |
| 0.05282100 | 0.05296000 | 0.05310700 | 0.05324400 | 0.05338800 | 0.05344700 | 0.05331500 | 0.05315600 | 0.05320300 | 0.05336000 | 0.05342900 | 0.05352300 | 0.05375800 | 0.05395600 |
| 0.05414200 | 0.05417400 | 0.05426500 | 0.05435800 | 0.05446700 | 0.05462800 | 0.05477300 | 0.05486500 | 0.05498800 | 0.05513800 | 0.05524100 | 0.05537900 | 0.05563200 | 0.05587100 |
| 0.04369300 | 0.04382700 | 0.04387100 | 0.04397200 | 0.04404100 | 0.04396900 | 0.04381300 | 0.04375100 | 0.04387700 | 0.04402000 | 0.04408100 | 0.04425500 | 0.04459300 | 0.04483500 |
| 0.04429700 | 0.04454500 | 0.04478800 | 0.04485400 | 0.04489000 | 0.04503200 | 0.04507700 | 0.04492300 | 0.04485700 | 0.04510000 | 0.04546300 | 0.04567700 | 0.04573900 | 0.04577700 |
| 0.04864300 | 0.04883700 | 0.04896900 | 0.04900300 | 0.04903900 | 0.04910600 | 0.04912000 | 0.04912000 | 0.04924700 | 0.04946600 | 0.04965900 | 0.04982800 | 0.04994200 | 0.04994700 |
| 0.05629700 | 0.05652700 | 0.05661000 | 0.05658900 | 0.05657600 | 0.05660200 | 0.05666000 | 0.05677300 | 0.05695500 | 0.05714700 | 0.05730200 | 0.05749800 | 0.05778600 | 0.05802500 |
| 0.04464500 | 0.04471400 | 0.04488500 | 0.04502100 | 0.04499700 | 0.04488600 | 0.04481800 | 0.04490700 | 0.04518000 | 0.04547600 | 0.04561400 | 0.04561800 | 0.04565600 | 0.04583500 |
| 0.04253900 | 0.04271200 | 0.04287100 | 0.04299600 | 0.04304400 | 0.04299600 | 0.04294600 | 0.04299200 | 0.04308700 | 0.04320300 | 0.04341600 | 0.04374400 | 0.04407800 | 0.04425500 |
| 0.02955100 | 0.02982700 | 0.03002200 | 0.03005400 | 0.03000900 | 0.02998800 | 0.02997700 | 0.02995300 | 0.03000100 | 0.03013900 | 0.03021800 | 0.03018900 | 0.03020700 | 0.03040600 |
| 0.03141600 | 0.03145100 | 0.03156200 | 0.03170000 | 0.03177000 | 0.03178100 | 0.03184100 | 0.03193900 | 0.03199100 | 0.03200500 | 0.03205200 | 0.03218000 | 0.03235000 | 0.03244200 |
| 0.03746000 | 0.03763600 | 0.03770000 | 0.03762600 | 0.03750000 | 0.03737000 | 0.03727200 | 0.03733600 | 0.03756200 | 0.03777000 | 0.03788900 | 0.03796900 | 0.03803200 | 0.03811000 |

| 8074       | 8076       | 8078       | 8080       | 8082       | 8084       | 8085       | 8087       | 8089       | 8091       | 8093       | 8095       | 8097       | 8099       |
|------------|------------|------------|------------|------------|------------|------------|------------|------------|------------|------------|------------|------------|------------|
| 0.04805600 | 0.04799600 | 0.04792200 | 0.04794100 | 0.04811200 | 0.04844200 | 0.04881000 | 0.04909200 | 0.04933800 | 0.04957000 | 0.04963700 | 0.04951600 | 0.04941200 | 0.04945800 |
| 0.04003800 | 0.04012900 | 0.04014600 | 0.04010100 | 0.04011500 | 0.04030400 | 0.04061300 | 0.04087200 | 0.04103400 | 0.04114600 | 0.04118100 | 0.04113000 | 0.04110500 | 0.04122700 |
| 0.05995300 | 0.05981300 | 0.05954600 | 0.05933800 | 0.05935200 | 0.05967700 | 0.06015000 | 0.06045500 | 0.06051900 | 0.06055000 | 0.06066500 | 0.06078000 | 0.06086700 | 0.06102800 |
| 0.05536500 | 0.05527900 | 0.05528600 | 0.05541600 | 0.05558500 | 0.05576100 | 0.05598100 | 0.05624300 | 0.05649800 | 0.05665300 | 0.05663100 | 0.05659400 | 0.05678700 | 0.05713800 |
| 0.03940900 | 0.03954300 | 0.03966400 | 0.03972400 | 0.03978500 | 0.03993700 | 0.04014400 | 0.04029700 | 0.04039400 | 0.04046500 | 0.04042000 | 0.04027100 | 0.04022700 | 0.04039600 |
| 0.05397700 | 0.05393100 | 0.05394400 | 0.05407300 | 0.05436000 | 0.05476100 | 0.05512900 | 0.05532100 | 0.05534400 | 0.05533300 | 0.05539200 | 0.05547700 | 0.05549700 | 0.05550900 |
| 0.05595000 | 0.05591000 | 0.05585900 | 0.05580900 | 0.05580900 | 0.05599800 | 0.05639800 | 0.05684300 | 0.05715700 | 0.05727600 | 0.05724500 | 0.05717800 | 0.05715400 | 0.05721200 |
| 0.04484500 | 0.04472200 | 0.04463000 | 0.04468300 | 0.04487500 | 0.04516200 | 0.04545600 | 0.04560200 | 0.04562400 | 0.04571100 | 0.04586600 | 0.04592500 | 0.04585700 | 0.04580500 |
| 0.04582300 | 0.04590600 | 0.04608500 | 0.04629900 | 0.04644300 | 0.04655000 | 0.04669200 | 0.04691000 | 0.04717800 | 0.04733800 | 0.04728500 | 0.04715000 | 0.04711300 | 0.04719800 |
| 0.04997700 | 0.05014000 | 0.05029400 | 0.05028400 | 0.05013600 | 0.05002600 | 0.05014100 | 0.05045700 | 0.05076600 | 0.05095100 | 0.05105100 | 0.05111900 | 0.05117400 | 0.05127300 |
| 0.05807600 | 0.05798600 | 0.05786800 | 0.05780400 | 0.05787800 | 0.05814200 | 0.05854300 | 0.05894500 | 0.05924800 | 0.05941300 | 0.05942600 | 0.05936400 | 0.05936400 | 0.05944700 |
| 0.04610100 | 0.04630800 | 0.04639100 | 0.04640500 | 0.04640300 | 0.04637500 | 0.04634600 | 0.04645700 | 0.04678800 | 0.04716400 | 0.04737300 | 0.04747200 | 0.04762600 | 0.04781700 |
| 0.04421700 | 0.04408300 | 0.04400800 | 0.04405800 | 0.04423400 | 0.04444900 | 0.04460500 | 0.04474100 | 0.04493500 | 0.04513800 | 0.04524700 | 0.04523000 | 0.04514600 | 0.04510700 |
| 0.03067900 | 0.03073900 | 0.03049900 | 0.03021000 | 0.03008800 | 0.03016200 | 0.03038200 | 0.03062600 | 0.03077500 | 0.03084600 | 0.03091800 | 0.03103600 | 0.03119600 | 0.03134200 |
| 0.03241800 | 0.03237300 | 0.03237700 | 0.03240900 | 0.03241400 | 0.03241700 | 0.03251100 | 0.03266400 | 0.03275100 | 0.03279500 | 0.03291100 | 0.03307000 | 0.03315700 | 0.03319600 |
| 0.03824400 | 0.03838900 | 0.03848900 | 0.03858200 | 0.03870400 | 0.03884300 | 0.03899100 | 0.03910600 | 0.03915400 | 0.03917500 | 0.03923300 | 0.03937400 | 0.03956700 | 0.03968100 |



| 8101       | 8103       | 8105       | 8107       | 8109       | 8111       | 8112       | 8114       | 8116       | 8118       | 8120       | 8122       | 8124       | 8126       |
|------------|------------|------------|------------|------------|------------|------------|------------|------------|------------|------------|------------|------------|------------|
| 0.04959100 | 0.04967000 | 0.04959300 | 0.04942400 | 0.04932800 | 0.04934600 | 0.04942100 | 0.04957100 | 0.04981600 | 0.05000700 | 0.04997500 | 0.04979400 | 0.04965500 | 0.04963600 |
| 0.04148300 | 0.04170000 | 0.04171300 | 0.04157700 | 0.04146000 | 0.04137900 | 0.04128100 | 0.04124000 | 0.04134500 | 0.04153500 | 0.04169700 | 0.04181500 | 0.04193100 | 0.04203900 |
| 0.06124500 | 0.06135900 | 0.06130800 | 0.06115900 | 0.06101100 | 0.06094600 | 0.06097600 | 0.06101900 | 0.06101400 | 0.06102200 | 0.06112200 | 0.06126500 | 0.06134700 | 0.06134300 |
| 0.05739100 | 0.05743600 | 0.05726300 | 0.05696100 | 0.05674000 | 0.05671100 | 0.05682700 | 0.05703600 | 0.05725700 | 0.05735100 | 0.05729400 | 0.05718500 | 0.05712000 | 0.05717100 |
| 0.04064100 | 0.04074700 | 0.04064200 | 0.04049200 | 0.04046000 | 0.04050700 | 0.04052400 | 0.04049200 | 0.04049000 | 0.04058500 | 0.04073200 | 0.04084500 | 0.04084700 | 0.04069000 |
| 0.05564000 | 0.05581100 | 0.05582500 | 0.05568100 | 0.05553400 | 0.05548000 | 0.05552700 | 0.05564300 | 0.05579200 | 0.05596500 | 0.05613400 | 0.05622900 | 0.05621000 | 0.05611600 |
| 0.05738500 | 0.05762900 | 0.05779100 | 0.05775500 | 0.05756000 | 0.05744200 | 0.05759800 | 0.05786800 | 0.05799700 | 0.05802200 | 0.05809000 | 0.05820300 | 0.05824700 | 0.05817500 |
| 0.04585300 | 0.04588600 | 0.04584400 | 0.04584900 | 0.04594100 | 0.04600700 | 0.04603100 | 0.04608700 | 0.04612300 | 0.04610000 | 0.04616200 | 0.04633400 | 0.04637300 | 0.04617400 |
| 0.04736700 | 0.04758500 | 0.04772700 | 0.04763800 | 0.04737400 | 0.04718000 | 0.04718900 | 0.04728600 | 0.04734200 | 0.04741100 | 0.04758000 | 0.04780500 | 0.04797400 | 0.04801500 |
| 0.05146400 | 0.05165500 | 0.05171400 | 0.05167000 | 0.05163100 | 0.05159700 | 0.05152200 | 0.05142100 | 0.05132700 | 0.05123400 | 0.05118200 | 0.05126400 | 0.05145300 | 0.05161300 |
| 0.05953500 | 0.05963700 | 0.05978900 | 0.05989800 | 0.05984800 | 0.05970600 | 0.05965500 | 0.05974200 | 0.05979800 | 0.05969200 | 0.05954000 | 0.05952700 | 0.05959200 | 0.05956700 |
| 0.04793800 | 0.04797200 | 0.04789800 | 0.04771100 | 0.04754700 | 0.04748800 | 0.04744700 | 0.04739900 | 0.04739100 | 0.04739100 | 0.04739000 | 0.04745600 | 0.04760800 | 0.04777900 |
| 0.04519800 | 0.04537700 | 0.04551600 | 0.04554200 | 0.04546500 | 0.04535800 | 0.04530000 | 0.04532000 | 0.04541500 | 0.04556900 | 0.04571500 | 0.04574200 | 0.04559200 | 0.04537500 |
| 0.03138100 | 0.03129600 | 0.03115600 | 0.03102700 | 0.03093400 | 0.03086100 | 0.03079400 | 0.03078500 | 0.03089100 | 0.03107300 | 0.03126300 | 0.03142300 | 0.03148100 | 0.03141800 |
| 0.03331600 | 0.03352400 | 0.03366400 | 0.03362700 | 0.03344600 | 0.03325200 | 0.03318100 | 0.03321200 | 0.03318400 | 0.03308500 | 0.03309000 | 0.03327100 | 0.03350600 | 0.03363600 |
| 0.03968100 | 0.03968000 | 0.03971400 | 0.03970900 | 0.03964600 | 0.03956700 | 0.03951900 | 0.03953700 | 0.03958300 | 0.03953700 | 0.03939900 | 0.03938700 | 0.03959400 | 0.03983600 |

| 8128       | 8130       | 8132       | 8134       | 8136       | 8138       | 8139       | 8141       | 8143       | 8145       | 8147       | 8149       | 8151       | 8153       |
|------------|------------|------------|------------|------------|------------|------------|------------|------------|------------|------------|------------|------------|------------|
| 0.04972100 | 0.04987900 | 0.05008800 | 0.05029200 | 0.05039200 | 0.05038300 | 0.05036300 | 0.05038900 | 0.05048400 | 0.05064800 | 0.05078000 | 0.05077700 | 0.05068900 | 0.05063600 |
| 0.04206200 | 0.04190500 | 0.04163600 | 0.04152000 | 0.04170800 | 0.04204700 | 0.04231400 | 0.04246500 | 0.04258200 | 0.04269200 | 0.04273900 | 0.04270900 | 0.04264400 | 0.04260000 |
| 0.06130300 | 0.06129500 | 0.06132400 | 0.06140400 | 0.06161400 | 0.06194600 | 0.06224500 | 0.06239200 | 0.06243300 | 0.06243200 | 0.06233100 | 0.06208600 | 0.06184600 | 0.06186800 |
| 0.05734200 | 0.05756000 | 0.05775600 | 0.05789800 | 0.05797400 | 0.05798700 | 0.05791000 | 0.05776800 | 0.05773200 | 0.05791200 | 0.05813800 | 0.05824200 | 0.05831300 | 0.05843300 |
| 0.04048100 | 0.04038200 | 0.04042900 | 0.04061200 | 0.04090100 | 0.04117400 | 0.04129700 | 0.04126700 | 0.04118500 | 0.04110700 | 0.04099400 | 0.04089500 | 0.04097500 | 0.04123700 |
| 0.05607500 | 0.05617900 | 0.05632300 | 0.05632300 | 0.05619000 | 0.05612400 | 0.05624500 | 0.05644700 | 0.05661400 | 0.05677000 | 0.05692900 | 0.05703100 | 0.05707500 | 0.05712100 |
| 0.05809100 | 0.05804400 | 0.05797600 | 0.05794900 | 0.05806900 | 0.05826300 | 0.05840400 | 0.05847400 | 0.05851500 | 0.05854100 | 0.05852600 | 0.05850700 | 0.05857200 | 0.05872300 |
| 0.04592700 | 0.04580900 | 0.04583300 | 0.04596400 | 0.04618900 | 0.04645500 | 0.04666300 | 0.04676400 | 0.04680400 | 0.04679700 | 0.04667700 | 0.04647400 | 0.04634400 | 0.04637500 |
| 0.04795200 | 0.04788200 | 0.04786900 | 0.04791700 | 0.04803400 | 0.04821300 | 0.04837400 | 0.04847800 | 0.04858500 | 0.04865700 | 0.04857700 | 0.04843500 | 0.04839300 | 0.04847200 |
| 0.05172300 | 0.05184100 | 0.05193200 | 0.05196600 | 0.05198700 | 0.05201400 | 0.05204400 | 0.05212400 | 0.05231400 | 0.05253200 | 0.05258000 | 0.05243800 | 0.05232000 | 0.05237400 |
| 0.05948000 | 0.05945200 | 0.05955600 | 0.05984200 | 0.06022500 | 0.06046200 | 0.06046500 | 0.06042700 | 0.06051200 | 0.06064900 | 0.06070800 | 0.06063400 | 0.06043300 | 0.06024700 |
| 0.04790900 | 0.04800200 | 0.04805800 | 0.04804600 | 0.04806000 | 0.04822600 | 0.04845600 | 0.04861100 | 0.04872200 | 0.04880800 | 0.04879000 | 0.04866300 | 0.04851800 | 0.04846100 |
| 0.04530800 | 0.04543800 | 0.04563400 | 0.04585800 | 0.04613400 | 0.04633900 | 0.04635500 | 0.04629500 | 0.04636400 | 0.04656100 | 0.04668900 | 0.04668700 | 0.04670000 | 0.04679600 |
| 0.03131000 | 0.03120200 | 0.03113600 | 0.03125800 | 0.03159400 | 0.03190300 | 0.03197200 | 0.03187400 | 0.03178600 | 0.03175000 | 0.03166900 | 0.03155000 | 0.03154500 | 0.03167900 |
| 0.03363700 | 0.03362400 | 0.03366400 | 0.03370000 | 0.03370100 | 0.03372500 | 0.03381900 | 0.03394700 | 0.03399800 | 0.03388500 | 0.03369600 | 0.03367900 | 0.03394500 | 0.03429000 |
| 0.03998700 | 0.04008300 | 0.04014500 | 0.04017500 | 0.04018800 | 0.04020600 | 0.04027600 | 0.04043500 | 0.04065400 | 0.04080900 | 0.04078000 | 0.04061400 | 0.04046800 | 0.04043400 |

| 8155       | 8157       | 8159       | 8161       | 8163       | 8165       | 8166       | 8168       | 8170       | 8172       | 8174       | 8176       | 8178       | 8180       |
|------------|------------|------------|------------|------------|------------|------------|------------|------------|------------|------------|------------|------------|------------|
| 0.05064200 | 0.05066300 | 0.05071500 | 0.05089200 | 0.05124300 | 0.05162900 | 0.05181200 | 0.05175100 | 0.05163400 | 0.05161200 | 0.05167200 | 0.05176500 | 0.05188200 | 0.05197300 |
| 0.04262500 | 0.04268000 | 0.04266200 | 0.04259000 | 0.04262200 | 0.04282700 | 0.04309600 | 0.04332900 | 0.04353600 | 0.04368300 | 0.04370700 | 0.04371000 | 0.04379000 | 0.04385800 |
| 0.06218500 | 0.06249400 | 0.06257500 | 0.06257000 | 0.06266700 | 0.06285400 | 0.06303100 | 0.06312900 | 0.06316800 | 0.06324500 | 0.06339600 | 0.06353100 | 0.06359800 | 0.06364900 |
| 0.05850300 | 0.05845900 | 0.05839000 | 0.05842700 | 0.05861400 | 0.05886900 | 0.05904100 | 0.05908000 | 0.05909700 | 0.05922900 | 0.05946500 | 0.05964700 | 0.05967200 | 0.05963900 |
| 0.04143900 | 0.04140900 | 0.04123900 | 0.04114900 | 0.04125800 | 0.04150200 | 0.04170800 | 0.04177200 | 0.04175600 | 0.04176900 | 0.04186700 | 0.04207900 | 0.04233900 | 0.04246400 |
| 0.05717900 | 0.05722500 | 0.05726300 | 0.05733600 | 0.05745800 | 0.05758200 | 0.05769100 | 0.05782800 | 0.05800500 | 0.05815600 | 0.05819200 | 0.05814200 | 0.05816700 | 0.05829700 |
| 0.05889800 | 0.05905900 | 0.05916700 | 0.05920600 | 0.05922100 | 0.05927300 | 0.05938400 | 0.05955000 | 0.05973300 | 0.05987000 | 0.05992900 | 0.05993500 | 0.05995500 | 0.06003700 |
| 0.04654800 | 0.04681900 | 0.04714000 | 0.04741200 | 0.04752700 | 0.04753800 | 0.04759800 | 0.04769700 | 0.04776800 | 0.04787100 | 0.04802100 | 0.04813800 | 0.04820500 | 0.04826600 |
| 0.04870900 | 0.04908700 | 0.04936500 | 0.04938100 | 0.04925200 | 0.04917000 | 0.04922000 | 0.04935800 | 0.04947500 | 0.04949900 | 0.04950500 | 0.04966200 | 0.04997800 | 0.05023200 |
| 0.05254600 | 0.05272500 | 0.05282800 | 0.05283900 | 0.05285900 | 0.05300000 | 0.05324300 | 0.05349000 | 0.05365600 | 0.05372100 | 0.05377800 | 0.05387100 | 0.05392800 | 0.05398100 |
| 0.06026100 | 0.06048100 | 0.06078200 | 0.06103400 | 0.06112400 | 0.06108800 | 0.06109200 | 0.06120000 | 0.06134400 | 0.06149300 | 0.06168400 | 0.06187600 | 0.06198600 | 0.06203100 |
| 0.04855100 | 0.04874900 | 0.04898100 | 0.04917400 | 0.04921700 | 0.04911400 | 0.04908300 | 0.04926900 | 0.04955500 | 0.04978700 | 0.04995300 | 0.05008300 | 0.05019500 | 0.05033800 |
| 0.04688500 | 0.04688500 | 0.04681700 | 0.04680400 | 0.04693400 | 0.04710700 | 0.04718300 | 0.04720500 | 0.04734500 | 0.04766100 | 0.04797800 | 0.04807500 | 0.04793600 | 0.04777300 |
| 0.03179700 | 0.03184700 | 0.03190400 | 0.03196800 | 0.03198400 | 0.03197300 | 0.03197700 | 0.03200700 | 0.03208200 | 0.03221000 | 0.03235400 | 0.03245500 | 0.03247100 | 0.03240900 |
| 0.03442200 | 0.03430800 | 0.03417000 | 0.03414900 | 0.03421300 | 0.03435900 | 0.03458700 | 0.03476600 | 0.03477700 | 0.03468400 | 0.03463800 | 0.03469300 | 0.03480300 | 0.03487100 |
| 0.04049400 | 0.04055100 | 0.04055600 | 0.04056600 | 0.04062500 | 0.04073000 | 0.04085800 | 0.04098700 | 0.04110400 | 0.04114600 | 0.04107600 | 0.04102600 | 0.04113100 | 0.04133200 |

| 8182       | 8184       | 8186       | 8188       | 8190       | 8192       | 8193       | 8195       | 8197       | 8199       | 8201       | 8203       | 8205       | 8207       |
|------------|------------|------------|------------|------------|------------|------------|------------|------------|------------|------------|------------|------------|------------|
| 0.05196900 | 0.05197200 | 0.05216200 | 0.05246200 | 0.05264700 | 0.05275300 | 0.05299300 | 0.05337400 | 0.05378800 | 0.05416400 | 0.05433700 | 0.05423600 | 0.05417700 | 0.05448300 |
| 0.04391200 | 0.04410800 | 0.04444800 | 0.04474400 | 0.04490200 | 0.04504300 | 0.04526800 | 0.04551800 | 0.04575200 | 0.04597000 | 0.04614400 | 0.04632000 | 0.04656500 | 0.04687100 |
| 0.06371200 | 0.06384100 | 0.06417200 | 0.06464200 | 0.06497100 | 0.06510300 | 0.06518500 | 0.06525600 | 0.06536600 | 0.06564500 | 0.06606600 | 0.06643600 | 0.06664100 | 0.06679600 |
| 0.05976000 | 0.06008900 | 0.06040700 | 0.06050100 | 0.06043300 | 0.06042400 | 0.06060100 | 0.06092500 | 0.06126300 | 0.06148300 | 0.06156600 | 0.06166900 | 0.06194700 | 0.06238500 |
| 0.04236100 | 0.04216000 | 0.04208800 | 0.04225200 | 0.04256900 | 0.04285400 | 0.04295200 | 0.04289600 | 0.04289600 | 0.04302100 | 0.04312400 | 0.04319800 | 0.04343100 | 0.04387300 |
| 0.05841200 | 0.05851700 | 0.05869700 | 0.05889500 | 0.05901200 | 0.05906200 | 0.05917200 | 0.05945400 | 0.05983400 | 0.06012900 | 0.06033000 | 0.06062400 | 0.06111500 | 0.06166800 |
| 0.06017600 | 0.06035000 | 0.06060300 | 0.06095300 | 0.06127200 | 0.06144000 | 0.06150300 | 0.06156800 | 0.06173300 | 0.06205000 | 0.06242800 | 0.06275200 | 0.06305800 | 0.06342600 |
| 0.04832300 | 0.04837800 | 0.04850400 | 0.04874400 | 0.04901200 | 0.04917800 | 0.04921800 | 0.04924700 | 0.04942700 | 0.04977400 | 0.05011200 | 0.05034900 | 0.05059200 | 0.05090600 |
| 0.05034400 | 0.05048200 | 0.05070800 | 0.05089700 | 0.05099300 | 0.05110100 | 0.05134900 | 0.05170800 | 0.05205100 | 0.05230600 | 0.05245900 | 0.05260400 | 0.05287300 | 0.05323000 |
| 0.05413400 | 0.05436800 | 0.05462400 | 0.05488100 | 0.05507900 | 0.05519900 | 0.05534800 | 0.05559400 | 0.05584000 | 0.05600900 | 0.05611300 | 0.05615900 | 0.05619900 | 0.05636700 |
| 0.06209100 | 0.06224800 | 0.06254100 | 0.06287300 | 0.06308600 | 0.06320600 | 0.06339200 | 0.06364100 | 0.06381800 | 0.06391000 | 0.06404300 | 0.06430600 | 0.06465400 | 0.06497000 |
| 0.05050400 | 0.05061000 | 0.05065000 | 0.05068400 | 0.05077300 | 0.05097800 | 0.05129800 | 0.05161200 | 0.05181100 | 0.05192900 | 0.05209000 | 0.05236700 | 0.05271500 | 0.05305600 |
| 0.04781100 | 0.04806400 | 0.04837300 | 0.04861000 | 0.04876300 | 0.04888400 | 0.04901000 | 0.04917100 | 0.04940600 | 0.04965600 | 0.04980900 | 0.04989800 | 0.05006800 | 0.05034900 |
| 0.03233500 | 0.03237200 | 0.03259700 | 0.03289400 | 0.03310400 | 0.03321800 | 0.03326000 | 0.03325500 | 0.03332000 | 0.03350900 | 0.03369100 | 0.03378200 | 0.03388300 | 0.03406800 |
| 0.03480000 | 0.03467500 | 0.03469900 | 0.03489300 | 0.03513100 | 0.03536300 | 0.03555300 | 0.03566900 | 0.03578400 | 0.03593800 | 0.03604900 | 0.03611200 | 0.03626900 | 0.03659500 |
| 0.04150000 | 0.04161500 | 0.04174500 | 0.04193700 | 0.04213900 | 0.04228500 | 0.04240200 | 0.04254600 | 0.04273400 | 0.04294700 | 0.04310400 | 0.04317700 | 0.04328700 | 0.04353400 |

| 8209       | 8211       | 8213       | 8215       | 8217       | 8219       | 8220       | 8222       | 8224       | 8226       | 8228       | 8230       | 8232       | 8234       |
|------------|------------|------------|------------|------------|------------|------------|------------|------------|------------|------------|------------|------------|------------|
| 0.05506100 | 0.05561100 | 0.05601700 | 0.05633000 | 0.05656300 | 0.05672400 | 0.05691300 | 0.05719800 | 0.05755100 | 0.05793100 | 0.05825400 | 0.05845600 | 0.05859900 | 0.05879400 |
| 0.04722800 | 0.04759400 | 0.04786800 | 0.04806800 | 0.04837600 | 0.04886900 | 0.04938300 | 0.04969100 | 0.04972400 | 0.04965600 | 0.04975200 | 0.05007900 | 0.05048800 | 0.05082200 |
| 0.06711400 | 0.06765000 | 0.06825500 | 0.06872700 | 0.06895600 | 0.06898200 | 0.06897700 | 0.06909000 | 0.06930500 | 0.06953900 | 0.06977800 | 0.07002400 | 0.07027700 | 0.07056900 |
| 0.06286800 | 0.06329400 | 0.06365700 | 0.06404300 | 0.06442400 | 0.06467400 | 0.06483100 | 0.06501200 | 0.06520900 | 0.06542400 | 0.06572200 | 0.06607000 | 0.06637700 | 0.06666200 |
| 0.04436400 | 0.04474000 | 0.04494000 | 0.04502100 | 0.04506600 | 0.04508300 | 0.04509200 | 0.04515200 | 0.04526700 | 0.04545000 | 0.04574500 | 0.04606100 | 0.04624700 | 0.04631600 |
| 0.06207600 | 0.06230600 | 0.06246800 | 0.06263000 | 0.06273700 | 0.06275500 | 0.06283700 | 0.06311600 | 0.06347100 | 0.06376800 | 0.06409500 | 0.06449200 | 0.06483900 | 0.06511500 |
| 0.06379800 | 0.06406100 | 0.06422000 | 0.06437600 | 0.06454900 | 0.06469700 | 0.06489900 | 0.06529400 | 0.06582500 | 0.06630300 | 0.06670400 | 0.06707700 | 0.06736000 | 0.06752800 |
| 0.05123800 | 0.05152800 | 0.05177400 | 0.05204800 | 0.05238100 | 0.05264600 | 0.05273700 | 0.05275500 | 0.05287100 | 0.05312200 | 0.05342800 | 0.05370000 | 0.05390500 | 0.05408600 |
| 0.05356900 | 0.05385300 | 0.05409700 | 0.05433400 | 0.05451200 | 0.05454800 | 0.05458100 | 0.05484300 | 0.05533700 | 0.05591100 | 0.05646200 | 0.05692100 | 0.05723400 | 0.05742400 |
| 0.05673700 | 0.05718700 | 0.05754000 | 0.05779600 | 0.05801500 | 0.05817500 | 0.05834700 | 0.05864300 | 0.05893800 | 0.05907800 | 0.05921700 | 0.05958900 | 0.06012800 | 0.06058900 |
| 0.06522300 | 0.06549800 | 0.06580600 | 0.06605300 | 0.06625500 | 0.06652700 | 0.06686700 | 0.06718100 | 0.06747600 | 0.06784900 | 0.06827500 | 0.06862400 | 0.06890400 | 0.06923400 |
| 0.05340600 | 0.05377600 | 0.05413900 | 0.05451600 | 0.05484600 | 0.05500000 | 0.05508800 | 0.05529500 | 0.05558300 | 0.05592900 | 0.05639500 | 0.05686300 | 0.05719600 | 0.05745500 |
| 0.05059600 | 0.05075100 | 0.05101900 | 0.05154100 | 0.05210200 | 0.05248000 | 0.05275000 | 0.05299800 | 0.05319600 | 0.05340500 | 0.05368300 | 0.05397700 | 0.05426100 | 0.05454800 |
| 0.03424900 | 0.03434400 | 0.03443100 | 0.03462300 | 0.03487400 | 0.03506000 | 0.03519400 | 0.03536900 | 0.03555800 | 0.03566500 | 0.03569400 | 0.03573400 | 0.03586100 | 0.03607400 |
| 0.03696900 | 0.03721600 | 0.03728200 | 0.03726100 | 0.03723300 | 0.03723100 | 0.03738600 | 0.03775800 | 0.03808400 | 0.03815200 | 0.03818600 | 0.03843900 | 0.03879600 | 0.03906300 |
| 0.04385100 | 0.04409800 | 0.04423000 | 0.04431100 | 0.04440900 | 0.04455900 | 0.04479600 | 0.04512500 | 0.04547100 | 0.04571700 | 0.04584800 | 0.04598400 | 0.04617800 | 0.04632700 |

| 8236       | 8238       | 8240       | 8242       | 8244       | 8246       | 8247       | 8249       | 8251       | 8253       | 8255       | 8257       | 8259       | 8261       |
|------------|------------|------------|------------|------------|------------|------------|------------|------------|------------|------------|------------|------------|------------|
| 0.05906600 | 0.05932100 | 0.05949000 | 0.05967100 | 0.05996000 | 0.06028800 | 0.06052100 | 0.06057300 | 0.06047500 | 0.06035100 | 0.06028500 | 0.06029600 | 0.06042300 | 0.06061800 |
| 0.05102300 | 0.05112400 | 0.05120500 | 0.05130500 | 0.05141700 | 0.05160000 | 0.05189000 | 0.05216200 | 0.05230500 | 0.05241500 | 0.05258300 | 0.05269700 | 0.05267300 | 0.05262100 |
| 0.07087700 | 0.07112400 | 0.07132000 | 0.07156900 | 0.07189100 | 0.07215100 | 0.07222600 | 0.07216700 | 0.07210500 | 0.07207100 | 0.07205200 | 0.07211100 | 0.07237000 | 0.07280000 |
| 0.06695200 | 0.06717300 | 0.06729200 | 0.06737400 | 0.06750700 | 0.06779900 | 0.06817800 | 0.06834900 | 0.06822500 | 0.06807500 | 0.06813500 | 0.06836000 | 0.06857100 | 0.06870500 |
| 0.04638200 | 0.04645500 | 0.04651800 | 0.04664300 | 0.04685600 | 0.04709100 | 0.04733800 | 0.04756400 | 0.04762200 | 0.04747600 | 0.04728200 | 0.04723500 | 0.04740100 | 0.04761700 |
| 0.06535600 | 0.06551200 | 0.06561900 | 0.06582400 | 0.06611500 | 0.06634100 | 0.06646500 | 0.06654900 | 0.06663500 | 0.06675100 | 0.06681600 | 0.06669700 | 0.06649800 | 0.06641500 |
| 0.06769100 | 0.06789300 | 0.06803900 | 0.06806600 | 0.06806300 | 0.06817100 | 0.06840500 | 0.06863400 | 0.06876500 | 0.06883700 | 0.06887700 | 0.06887100 | 0.06890700 | 0.06910200 |
| 0.05424400 | 0.05431900 | 0.05438000 | 0.05456200 | 0.05479300 | 0.05497200 | 0.05521100 | 0.05553800 | 0.05567000 | 0.05546600 | 0.05525300 | 0.05534300 | 0.05564000 | 0.05591400 |
| 0.05753200 | 0.05760000 | 0.05772100 | 0.05794800 | 0.05817600 | 0.05828200 | 0.05829900 | 0.05832900 | 0.05836700 | 0.05836500 | 0.05835700 | 0.05842200 | 0.05862000 | 0.05896200 |
| 0.06086500 | 0.06101200 | 0.06110200 | 0.06116200 | 0.06121500 | 0.06133000 | 0.06153100 | 0.06173800 | 0.06183900 | 0.06180800 | 0.06175600 | 0.06179300 | 0.06190900 | 0.06207600 |
| 0.06954500 | 0.06967300 | 0.06971000 | 0.06986100 | 0.07014800 | 0.07048900 | 0.07077200 | 0.07081900 | 0.07059000 | 0.07030700 | 0.07024000 | 0.07045500 | 0.07077300 | 0.07095800 |
| 0.05765400 | 0.05771800 | 0.05770900 | 0.05777600 | 0.05793300 | 0.05809200 | 0.05821700 | 0.05830400 | 0.05830500 | 0.05818900 | 0.05803500 | 0.05798400 | 0.05813900 | 0.05845400 |
| 0.05474800 | 0.05478700 | 0.05476700 | 0.05480200 | 0.05491300 | 0.05510900 | 0.05534000 | 0.05547500 | 0.05551100 | 0.05554500 | 0.05553200 | 0.05544600 | 0.05548400 | 0.05571500 |
| 0.03626500 | 0.03634100 | 0.03635600 | 0.03634200 | 0.03627000 | 0.03627100 | 0.03646400 | 0.03666900 | 0.03672200 | 0.03671500 | 0.03671500 | 0.03670200 | 0.03675700 | 0.03693000 |
| 0.03920800 | 0.03921500 | 0.03912200 | 0.03907900 | 0.03913600 | 0.03922100 | 0.03937600 | 0.03962200 | 0.03977400 | 0.03972800 | 0.03963500 | 0.03968700 | 0.03991700 | 0.04014500 |
| 0.04637900 | 0.04640200 | 0.04644400 | 0.04654500 | 0.04677400 | 0.04706100 | 0.04720300 | 0.04716300 | 0.04713100 | 0.04723800 | 0.04742100 | 0.04753800 | 0.04756000 | 0.04757700 |

| 8263       | 8265       | 8267       | 8269       | 8271       | 8273       | 8274       | 8276       | 8278       | 8280       | 8282       | 8284       | 8286       | 8288       |
|------------|------------|------------|------------|------------|------------|------------|------------|------------|------------|------------|------------|------------|------------|
| 0.06072800 | 0.06074600 | 0.06083100 | 0.06102000 | 0.06118400 | 0.06122800 | 0.06116000 | 0.06103100 | 0.06086100 | 0.06064500 | 0.06044100 | 0.06033800 | 0.06035200 | 0.06042300 |
| 0.05268100 | 0.05285300 | 0.05302500 | 0.05313400 | 0.05322200 | 0.05329200 | 0.05328600 | 0.05321400 | 0.05306900 | 0.05280400 | 0.05248100 | 0.05224300 | 0.05218600 | 0.05234600 |
| 0.07311300 | 0.07307800 | 0.07284700 | 0.07277100 | 0.07297800 | 0.07321500 | 0.07316900 | 0.07290500 | 0.07275900 | 0.07283000 | 0.07287100 | 0.07270200 | 0.07245700 | 0.07234500 |
| 0.06878700 | 0.06880500 | 0.06880100 | 0.06885600 | 0.06894700 | 0.06902900 | 0.06910400 | 0.06908100 | 0.06889200 | 0.06865600 | 0.06847400 | 0.06831500 | 0.06821100 | 0.06822500 |
| 0.04767600 | 0.04757400 | 0.04746600 | 0.04748800 | 0.04762500 | 0.04773500 | 0.04772600 | 0.04762700 | 0.04753100 | 0.04749600 | 0.04748100 | 0.04746100 | 0.04749000 | 0.04755300 |
| 0.06640700 | 0.06637100 | 0.06642600 | 0.06669700 | 0.06706900 | 0.06735900 | 0.06754500 | 0.06766500 | 0.06766700 | 0.06750100 | 0.06727100 | 0.06713400 | 0.06705100 | 0.06690600 |
| 0.06941300 | 0.06965700 | 0.06971500 | 0.06964200 | 0.06956300 | 0.06957700 | 0.06971900 | 0.06990200 | 0.06993600 | 0.06972800 | 0.06940200 | 0.06914200 | 0.06899300 | 0.06891400 |
| 0.05605600 | 0.05606500 | 0.05604000 | 0.05608000 | 0.05615000 | 0.05619400 | 0.05624400 | 0.05629400 | 0.05624500 | 0.05603900 | 0.05572800 | 0.05547400 | 0.05543000 | 0.05551700 |
| 0.05931700 | 0.05946700 | 0.05938000 | 0.05926200 | 0.05923100 | 0.05921000 | 0.05917400 | 0.05918800 | 0.05925400 | 0.05930100 | 0.05928600 | 0.05923400 | 0.05920900 | 0.05922100 |
| 0.06226600 | 0.06235200 | 0.06231200 | 0.06235700 | 0.06257000 | 0.06270500 | 0.06258200 | 0.06233500 | 0.06212900 | 0.06194900 | 0.06180700 | 0.06186100 | 0.06215400 | 0.06247500 |
| 0.07095400 | 0.07088100 | 0.07083700 | 0.07086200 | 0.07095700 | 0.07110600 | 0.07134700 | 0.07166000 | 0.07184000 | 0.07172400 | 0.07144100 | 0.07121600 | 0.07109100 | 0.07100300 |
| 0.05874700 | 0.05891300 | 0.05902900 | 0.05915600 | 0.05923500 | 0.05924500 | 0.05924900 | 0.05923900 | 0.05916000 | 0.05905200 | 0.05898100 | 0.05893500 | 0.05891100 | 0.05891100 |
| 0.05584700 | 0.05573600 | 0.05565700 | 0.05578400 | 0.05594300 | 0.05601200 | 0.05608600 | 0.05621700 | 0.05629200 | 0.05620700 | 0.05602100 | 0.05590000 | 0.05589400 | 0.05590700 |
| 0.03710200 | 0.03718300 | 0.03724100 | 0.03733400 | 0.03742700 | 0.03750800 | 0.03755000 | 0.03745200 | 0.03720100 | 0.03691700 | 0.03671300 | 0.03666200 | 0.03678600 | 0.03700600 |
| 0.04012500 | 0.03985600 | 0.03962000 | 0.03966600 | 0.03994400 | 0.04020400 | 0.04033400 | 0.04043300 | 0.04050200 | 0.04038300 | 0.04010900 | 0.03991000 | 0.03989000 | 0.03999400 |
| 0.04766000 | 0.04779000 | 0.04792900 | 0.04806600 | 0.04816500 | 0.04819300 | 0.04818800 | 0.04817900 | 0.04809900 | 0.04796500 | 0.04786000 | 0.04774700 | 0.04761500 | 0.04753300 |

| 8290       | 8292       | 8294       | 8296       | 8298       | 8300       | 8301       | 8303       | 8305       | 8307       | 8309       | 8311       | 8313       | 8315       |
|------------|------------|------------|------------|------------|------------|------------|------------|------------|------------|------------|------------|------------|------------|
| 0.06050000 | 0.06057200 | 0.06058100 | 0.06045100 | 0.06025100 | 0.06014500 | 0.06017900 | 0.06024000 | 0.06019100 | 0.05998600 | 0.05975100 | 0.05970100 | 0.05984000 | 0.05993100 |
| 0.05265100 | 0.05291800 | 0.05303500 | 0.05302000 | 0.05291200 | 0.05275600 | 0.05263200 | 0.05258200 | 0.05257500 | 0.05256100 | 0.05247900 | 0.05231700 | 0.05217700 | 0.05210600 |
| 0.07232900 | 0.07220700 | 0.07195900 | 0.07178600 | 0.07181100 | 0.07194800 | 0.07204400 | 0.07206200 | 0.07207100 | 0.07211500 | 0.07218600 | 0.07224300 | 0.07223100 | 0.07220700 |
| 0.06830400 | 0.06841400 | 0.06856700 | 0.06865200 | 0.06853700 | 0.06828900 | 0.06808500 | 0.06802500 | 0.06810300 | 0.06822000 | 0.06824600 | 0.06816000 | 0.06808800 | 0.06808600 |
| 0.04753400 | 0.04741900 | 0.04733600 | 0.04732600 | 0.04727300 | 0.04714200 | 0.04708100 | 0.04718100 | 0.04732000 | 0.04732900 | 0.04715000 | 0.04690800 | 0.04682100 | 0.04691500 |
| 0.06673200 | 0.06661900 | 0.06657400 | 0.06654900 | 0.06650500 | 0.06647000 | 0.06653600 | 0.06673700 | 0.06693200 | 0.06690700 | 0.06667300 | 0.06646700 | 0.06646600 | 0.06660300 |
| 0.06888500 | 0.06890700 | 0.06898200 | 0.06911300 | 0.06920900 | 0.06905500 | 0.06863300 | 0.06827200 | 0.06824600 | 0.06851200 | 0.06887100 | 0.06909700 | 0.06905200 | 0.06877600 |
| 0.05552800 | 0.05548500 | 0.05553900 | 0.05564400 | 0.05564300 | 0.05550900 | 0.05538100 | 0.05538300 | 0.05546100 | 0.05549100 | 0.05546000 | 0.05541300 | 0.05538800 | 0.05538400 |
| 0.05923400 | 0.05925600 | 0.05926300 | 0.05915800 | 0.05894600 | 0.05873900 | 0.05861800 | 0.05868700 | 0.05895800 | 0.05917100 | 0.05907900 | 0.05877800 | 0.05852100 | 0.05838000 |
| 0.06259000 | 0.06247600 | 0.06229300 | 0.06215300 | 0.06200900 | 0.06183500 | 0.06171000 | 0.06169100 | 0.06176300 | 0.06184400 | 0.06183900 | 0.06176500 | 0.06171200 | 0.06169600 |
| 0.07094500 | 0.07095600 | 0.07105400 | 0.07118500 | 0.07119500 | 0.07100100 | 0.07072300 | 0.07049600 | 0.07032800 | 0.07024800 | 0.07027500 | 0.07035700 | 0.07048700 | 0.07064100 |
| 0.05889500 | 0.05887700 | 0.05889100 | 0.05885200 | 0.05866600 | 0.05842300 | 0.05828800 | 0.05832800 | 0.05848800 | 0.05856300 | 0.05837000 | 0.05806100 | 0.05800300 | 0.05825300 |
| 0.05587400 | 0.05586100 | 0.05590000 | 0.05588900 | 0.05575100 | 0.05554700 | 0.05536800 | 0.05525500 | 0.05524100 | 0.05534300 | 0.05548500 | 0.05558100 | 0.05568300 | 0.05580800 |
| 0.03719600 | 0.03722700 | 0.03703800 | 0.03677100 | 0.03659800 | 0.03646700 | 0.03630400 | 0.03622600 | 0.03629000 | 0.03632100 | 0.03619800 | 0.03609700 | 0.03629500 | 0.03670100 |
| 0.04011500 | 0.04013900 | 0.04004200 | 0.03993100 | 0.03991700 | 0.03994800 | 0.03990900 | 0.03982400 | 0.03979100 | 0.03976000 | 0.03961300 | 0.03945900 | 0.03952200 | 0.03971200 |
| 0.04745700 | 0.04735300 | 0.04735200 | 0.04750700 | 0.04767100 | 0.04775700 | 0.04781800 | 0.04783800 | 0.04774700 | 0.04760400 | 0.04749900 | 0.04742200 | 0.04738800 | 0.04743700 |



| 8317       | 8319       | 8321       | 8323       | 8325       | 8327       | 8328       | 8330       | 8332       | 8334       | 8336       | 8338       | 8340       | 8342       |
|------------|------------|------------|------------|------------|------------|------------|------------|------------|------------|------------|------------|------------|------------|
| 0.05986700 | 0.05975600 | 0.05968700 | 0.05965300 | 0.05957300 | 0.05932200 | 0.05891300 | 0.05850100 | 0.05812100 | 0.05773100 | 0.05739800 | 0.05717200 | 0.05695500 | 0.05665100 |
| 0.05200000 | 0.05182100 | 0.05168200 | 0.05162300 | 0.05150800 | 0.05125300 | 0.05095600 | 0.05067700 | 0.05029800 | 0.04978500 | 0.04932700 | 0.04905600 | 0.04892800 | 0.04887600 |
| 0.07227200 | 0.07236400 | 0.07231400 | 0.07201300 | 0.07149200 | 0.07092600 | 0.07049800 | 0.07021500 | 0.06996300 | 0.06971300 | 0.06951300 | 0.06935600 | 0.06919300 | 0.06893200 |
| 0.06803600 | 0.06788800 | 0.06774500 | 0.06762200 | 0.06742100 | 0.06708700 | 0.06666400 | 0.06625500 | 0.06592200 | 0.06565600 | 0.06538600 | 0.06503700 | 0.06472100 | 0.06463000 |
| 0.04698700 | 0.04694000 | 0.04687800 | 0.04685000 | 0.04678600 | 0.04667300 | 0.04652700 | 0.04630200 | 0.04604900 | 0.04592400 | 0.04586800 | 0.04562000 | 0.04515900 | 0.04476200 |
| 0.06667100 | 0.06659100 | 0.06647200 | 0.06635700 | 0.06609300 | 0.06558100 | 0.06497800 | 0.06451200 | 0.06427400 | 0.06421500 | 0.06413100 | 0.06383700 | 0.06342500 | 0.06308600 |
| 0.06844200 | 0.06829800 | 0.06844400 | 0.06859300 | 0.06836200 | 0.06782900 | 0.06738900 | 0.06719700 | 0.06706200 | 0.06680800 | 0.06647000 | 0.06609600 | 0.06566800 | 0.06529400 |
| 0.05529400 | 0.05507100 | 0.05482000 | 0.05460500 | 0.05436900 | 0.05405000 | 0.05367100 | 0.05335400 | 0.05320900 | 0.05323100 | 0.05330400 | 0.05329500 | 0.05316800 | 0.05294800 |
| 0.05831100 | 0.05829000 | 0.05822800 | 0.05802400 | 0.05772900 | 0.05745000 | 0.05718500 | 0.05683600 | 0.05640400 | 0.05603600 | 0.05576100 | 0.05549400 | 0.05527600 | 0.05513100 |
| 0.06163800 | 0.06150500 | 0.06140700 | 0.06139000 | 0.06128100 | 0.06096700 | 0.06063200 | 0.06050600 | 0.06057900 | 0.06062500 | 0.06044400 | 0.06007300 | 0.05968000 | 0.05928700 |
| 0.07067000 | 0.07052600 | 0.07035300 | 0.07015000 | 0.06975000 | 0.06923900 | 0.06893200 | 0.06885700 | 0.06872900 | 0.06841900 | 0.06804300 | 0.06772200 | 0.06751200 | 0.06737500 |
| 0.05842300 | 0.05817900 | 0.05766900 | 0.05728800 | 0.05713600 | 0.05699600 | 0.05672400 | 0.05641100 | 0.05618000 | 0.05600000 | 0.05576800 | 0.05552600 | 0.05538100 | 0.05524500 |
| 0.05581500 | 0.05561800 | 0.05530800 | 0.05501800 | 0.05475900 | 0.05448200 | 0.05422900 | 0.05398600 | 0.05362300 | 0.05320300 | 0.05293000 | 0.05281200 | 0.05271400 | 0.05253600 |
| 0.03691900 | 0.03678800 | 0.03650400 | 0.03627600 | 0.03612800 | 0.03597100 | 0.03579500 | 0.03566700 | 0.03561200 | 0.03560800 | 0.03556700 | 0.03541300 | 0.03529900 | 0.03539000 |
| 0.03974200 | 0.03959500 | 0.03948200 | 0.03949700 | 0.03948800 | 0.03927000 | 0.03893300 | 0.03874600 | 0.03870500 | 0.03857800 | 0.03834500 | 0.03819400 | 0.03816500 | 0.03812800 |
| 0.04744100 | 0.04726600 | 0.04704200 | 0.04692600 | 0.04681800 | 0.04658800 | 0.04634500 | 0.04622000 | 0.04608000 | 0.04581700 | 0.04555400 | 0.04536900 | 0.04523300 | 0.04510700 |

| 8344       | 8346       | 8348       | 8350       | 8352       | 8354       | 8355       | 8357       | 8359       | 8361       | 8363       | 8365       | 8367       | 8369       |
|------------|------------|------------|------------|------------|------------|------------|------------|------------|------------|------------|------------|------------|------------|
| 0.05633100 | 0.05610800 | 0.05594800 | 0.05573400 | 0.05543600 | 0.05512300 | 0.05489000 | 0.05474900 | 0.05461900 | 0.05441800 | 0.05413600 | 0.05385400 | 0.05363500 | 0.05344200 |
| 0.04881800 | 0.04869300 | 0.04858700 | 0.04849800 | 0.04820400 | 0.04763500 | 0.04706600 | 0.04676100 | 0.04665800 | 0.04654300 | 0.04636900 | 0.04617300 | 0.04591800 | 0.04561100 |
| 0.06851500 | 0.06807300 | 0.06783300 | 0.06782400 | 0.06781800 | 0.06761700 | 0.06727800 | 0.06696300 | 0.06673700 | 0.06658300 | 0.06644500 | 0.06624800 | 0.06598600 | 0.06576200 |
| 0.06468000 | 0.06459900 | 0.06433200 | 0.06403900 | 0.06375600 | 0.06339300 | 0.06303300 | 0.06284400 | 0.06274600 | 0.06254900 | 0.06225500 | 0.06196400 | 0.06170300 | 0.06144600 |
| 0.04457200 | 0.04446500 | 0.04436700 | 0.04434800 | 0.04437300 | 0.04430200 | 0.04413900 | 0.04398700 | 0.04386300 | 0.04375300 | 0.04366800 | 0.04356500 | 0.04337200 | 0.04312900 |
| 0.06283800 | 0.06264700 | 0.06256300 | 0.06252600 | 0.06237100 | 0.06205800 | 0.06162800 | 0.06117600 | 0.06083700 | 0.06057800 | 0.06031500 | 0.06013400 | 0.06001500 | 0.05979700 |
| 0.06510000 | 0.06498900 | 0.06479800 | 0.06450400 | 0.06415800 | 0.06379400 | 0.06345600 | 0.06322600 | 0.06309400 | 0.06291100 | 0.06263300 | 0.06241600 | 0.06234200 | 0.06228900 |
| 0.05264300 | 0.05233100 | 0.05209700 | 0.05187800 | 0.05159700 | 0.05132000 | 0.05115200 | 0.05110700 | 0.05107200 | 0.05089700 | 0.05056400 | 0.05019300 | 0.04985500 | 0.04952100 |
| 0.05490800 | 0.05453600 | 0.05421300 | 0.05410100 | 0.05407900 | 0.05396000 | 0.05370500 | 0.05333400 | 0.05289500 | 0.05253700 | 0.05236500 | 0.05227700 | 0.05213900 | 0.05198600 |
| 0.05887000 | 0.05854400 | 0.05837100 | 0.05825200 | 0.05806500 | 0.05776300 | 0.05742900 | 0.05721000 | 0.05709600 | 0.05695900 | 0.05676800 | 0.05660200 | 0.05646700 | 0.05627300 |
| 0.06717100 | 0.06686900 | 0.06658700 | 0.06632200 | 0.06593400 | 0.06545800 | 0.06513200 | 0.06502900 | 0.06493600 | 0.06472900 | 0.06455800 | 0.06446500 | 0.06429100 | 0.06401400 |
| 0.05500000 | 0.05475100 | 0.05458600 | 0.05440500 | 0.05410800 | 0.05374500 | 0.05343100 | 0.05318900 | 0.05292800 | 0.05256900 | 0.05221600 | 0.05204400 | 0.05197000 | 0.05178900 |
| 0.05222300 | 0.05191500 | 0.05182600 | 0.05182300 | 0.05157100 | 0.05107900 | 0.05065200 | 0.05044600 | 0.05038700 | 0.05036100 | 0.05028000 | 0.05011700 | 0.04991300 | 0.04969900 |
| 0.03550300 | 0.03539000 | 0.03512200 | 0.03486000 | 0.03461500 | 0.03437000 | 0.03411100 | 0.03384400 | 0.03370500 | 0.03375700 | 0.03383200 | 0.03377500 | 0.03363100 | 0.03355400 |
| 0.03798700 | 0.03773500 | 0.03743300 | 0.03715800 | 0.03690400 | 0.03662100 | 0.03637200 | 0.03628600 | 0.03636900 | 0.03648600 | 0.03652000 | 0.03646500 | 0.03635400 | 0.03618600 |
| 0.04490600 | 0.04464700 | 0.04454400 | 0.04463100 | 0.04460800 | 0.04430400 | 0.04395700 | 0.04380100 | 0.04365600 | 0.04328200 | 0.04285800 | 0.04270900 | 0.04277700 | 0.04275100 |

| 8371       | 8373       | 8375       | 8377       | 8379       | 8381       | 8382       | 8384       | 8386       | 8388       | 8390       | 8392       | 8394       | 8396       |
|------------|------------|------------|------------|------------|------------|------------|------------|------------|------------|------------|------------|------------|------------|
| 0.05324800 | 0.05310300 | 0.05296700 | 0.05270000 | 0.05235500 | 0.05217900 | 0.05228500 | 0.05258100 | 0.05286600 | 0.05291500 | 0.05266900 | 0.05226700 | 0.05186100 | 0.05156300 |
| 0.04534900 | 0.04515100 | 0.04497000 | 0.04483600 | 0.04474900 | 0.04463300 | 0.04453800 | 0.04460700 | 0.04483200 | 0.04503400 | 0.04505600 | 0.04491000 | 0.04468300 | 0.04438800 |
| 0.06557900 | 0.06528700 | 0.06489600 | 0.06460800 | 0.06452800 | 0.06460500 | 0.06474000 | 0.06485800 | 0.06496000 | 0.06501400 | 0.06488500 | 0.06457900 | 0.06433700 | 0.06426700 |
| 0.06117900 | 0.06096400 | 0.06088400 | 0.06087300 | 0.06077600 | 0.06058400 | 0.06046400 | 0.06055400 | 0.06074200 | 0.06079500 | 0.06065900 | 0.06039200 | 0.06003800 | 0.05970800 |
| 0.04300400 | 0.04308900 | 0.04319400 | 0.04305400 | 0.04275700 | 0.04261400 | 0.04264300 | 0.04262300 | 0.04247200 | 0.04228700 | 0.04222700 | 0.04236100 | 0.04252200 | 0.04246300 |
| 0.05953600 | 0.05938600 | 0.05932700 | 0.05931000 | 0.05933100 | 0.05931400 | 0.05922200 | 0.05921000 | 0.05934900 | 0.05942700 | 0.05927100 | 0.05898500 | 0.05872900 | 0.05855800 |
| 0.06215600 | 0.06197100 | 0.06178400 | 0.06162000 | 0.06146600 | 0.06125300 | 0.06102600 | 0.06099600 | 0.06121700 | 0.06146100 | 0.06147800 | 0.06123700 | 0.06094700 | 0.06079800 |
| 0.04924200 | 0.04917100 | 0.04928500 | 0.04935900 | 0.04928700 | 0.04917400 | 0.04911500 | 0.04909900 | 0.04907600 | 0.04906600 | 0.04914200 | 0.04921300 | 0.04911500 | 0.04887200 |
| 0.05190800 | 0.05184400 | 0.05162000 | 0.05125900 | 0.05106500 | 0.05112200 | 0.05106900 | 0.05074000 | 0.05046300 | 0.05051500 | 0.05074700 | 0.05082800 | 0.05061800 | 0.05033600 |
| 0.05602000 | 0.05582600 | 0.05571700 | 0.05561800 | 0.05548900 | 0.05536700 | 0.05531700 | 0.05534300 | 0.05538700 | 0.05543100 | 0.05545500 | 0.05540200 | 0.05524600 | 0.05495600 |
| 0.06377000 | 0.06362000 | 0.06355500 | 0.06349300 | 0.06329900 | 0.06297600 | 0.06267800 | 0.06255800 | 0.06267800 | 0.06292300 | 0.06306900 | 0.06297400 | 0.06266300 | 0.06230800 |
| 0.05158600 | 0.05156900 | 0.05167600 | 0.05164000 | 0.05135000 | 0.05099500 | 0.05082400 | 0.05081200 | 0.05075200 | 0.05062200 | 0.05056400 | 0.05056500 | 0.05050300 | 0.05038000 |
| 0.04951600 | 0.04942600 | 0.04938500 | 0.04928500 | 0.04911800 | 0.04898200 | 0.04896200 | 0.04906200 | 0.04919500 | 0.04917900 | 0.04890300 | 0.04851400 | 0.04822800 | 0.04809400 |
| 0.03359600 | 0.03357800 | 0.03337800 | 0.03314300 | 0.03298400 | 0.03281000 | 0.03262400 | 0.03265400 | 0.03298600 | 0.03333900 | 0.03341200 | 0.03320400 | 0.03288400 | 0.03260600 |
| 0.03601200 | 0.03593200 | 0.03591500 | 0.03585800 | 0.03573100 | 0.03552800 | 0.03527300 | 0.03514400 | 0.03528700 | 0.03552800 | 0.03560700 | 0.03556800 | 0.03556900 | 0.03553900 |
| 0.04255800 | 0.04239700 | 0.04237200 | 0.04242200 | 0.04252800 | 0.04267800 | 0.04276800 | 0.04271800 | 0.04254400 | 0.04230900 | 0.04210500 | 0.04199100 | 0.04194300 | 0.04188700 |

| 8398       | 8400       | 8402       | 8404       | 8406       | 8408       | 8409       | 8411       | 8413       | 8415       | 8417       | 8419       | 8421       | 8423       |
|------------|------------|------------|------------|------------|------------|------------|------------|------------|------------|------------|------------|------------|------------|
| 0.05145200 | 0.05149400 | 0.05152400 | 0.05149100 | 0.05147400 | 0.05141700 | 0.05118900 | 0.05085200 | 0.05061800 | 0.05054300 | 0.05043700 | 0.05019200 | 0.04996600 | 0.04984500 |
| 0.04401100 | 0.04363100 | 0.04335200 | 0.04320500 | 0.04315400 | 0.04308400 | 0.04295800 | 0.04292100 | 0.04299200 | 0.04298500 | 0.04283400 | 0.04256400 | 0.04219500 | 0.04186600 |
| 0.06413800 | 0.06377100 | 0.06335300 | 0.06316000 | 0.06320000 | 0.06322300 | 0.06306400 | 0.06287400 | 0.06282700 | 0.06282300 | 0.06269900 | 0.06244700 | 0.06213800 | 0.06184600 |
| 0.05948000 | 0.05933000 | 0.05925700 | 0.05929200 | 0.05943300 | 0.05958000 | 0.05957500 | 0.05939400 | 0.05919700 | 0.05905900 | 0.05877400 | 0.05822600 | 0.05776500 | 0.05770100 |
| 0.04216400 | 0.04186200 | 0.04176000 | 0.04182500 | 0.04193600 | 0.04198500 | 0.04189200 | 0.04172900 | 0.04166700 | 0.04171600 | 0.04170900 | 0.04158500 | 0.04145600 | 0.04133900 |
| 0.05848200 | 0.05844200 | 0.05828500 | 0.05799600 | 0.05777400 | 0.05769400 | 0.05760800 | 0.05744000 | 0.05722100 | 0.05693500 | 0.05662300 | 0.05646900 | 0.05652900 | 0.05656900 |
| 0.06078600 | 0.06077800 | 0.06063100 | 0.06040100 | 0.06026700 | 0.06015600 | 0.05986500 | 0.05944400 | 0.05907300 | 0.05882000 | 0.05873400 | 0.05886100 | 0.05907000 | 0.05908600 |
| 0.04860000 | 0.04836700 | 0.04818400 | 0.04803400 | 0.04794800 | 0.04794400 | 0.04789100 | 0.04769000 | 0.04745000 | 0.04731800 | 0.04726700 | 0.04715500 | 0.04695300 | 0.04673700 |
| 0.05025400 | 0.05025900 | 0.05006100 | 0.04972300 | 0.04952500 | 0.04944900 | 0.04927400 | 0.04903900 | 0.04894600 | 0.04899600 | 0.04903200 | 0.04897100 | 0.04881800 | 0.04856300 |
| 0.05457900 | 0.05432200 | 0.05425700 | 0.05422100 | 0.05413800 | 0.05409000 | 0.05415100 | 0.05427800 | 0.05427100 | 0.05398500 | 0.05359400 | 0.05334400 | 0.05320300 | 0.05304500 |
| 0.06210200 | 0.06202000 | 0.06188800 | 0.06177200 | 0.06186800 | 0.06198700 | 0.06178200 | 0.06133600 | 0.06097900 | 0.06082200 | 0.06079900 | 0.06087400 | 0.06100900 | 0.06101100 |
| 0.05026600 | 0.05017400 | 0.05008900 | 0.05000600 | 0.04995100 | 0.04991200 | 0.04976600 | 0.04948800 | 0.04917100 | 0.04886000 | 0.04861500 | 0.04847300 | 0.04833400 | 0.04812500 |
| 0.04807300 | 0.04812500 | 0.04813300 | 0.04795500 | 0.04762100 | 0.04735700 | 0.04728700 | 0.04729200 | 0.04725300 | 0.04715800 | 0.04699200 | 0.04675600 | 0.04654100 | 0.04642000 |
| 0.03247400 | 0.03249700 | 0.03255700 | 0.03253600 | 0.03248000 | 0.03245500 | 0.03233800 | 0.03206700 | 0.03187600 | 0.03191300 | 0.03198000 | 0.03192100 | 0.03184000 | 0.03182600 |
| 0.03537400 | 0.03520600 | 0.03516000 | 0.03510700 | 0.03495200 | 0.03482900 | 0.03478600 | 0.03473500 | 0.03470600 | 0.03476200 | 0.03482800 | 0.03479100 | 0.03465800 | 0.03453900 |
| 0.04179500 | 0.04171300 | 0.04165700 | 0.04156300 | 0.04145200 | 0.04143800 | 0.04146900 | 0.04136900 | 0.04117200 | 0.04103000 | 0.04096600 | 0.04090900 | 0.04082300 | 0.04071400 |

| 8425       | 8427       | 8429       | 8431       | 8433       | 8435       | 8436       | 8438       | 8440       | 8442       | 8444       | 8446       | 8448       | 8450       |
|------------|------------|------------|------------|------------|------------|------------|------------|------------|------------|------------|------------|------------|------------|
| 0.04969200 | 0.04945900 | 0.04922000 | 0.04896900 | 0.04870800 | 0.04849100 | 0.04829500 | 0.04810800 | 0.04797700 | 0.04785000 | 0.04762900 | 0.04735200 | 0.04712500 | 0.04700600 |
| 0.04169500 | 0.04159800 | 0.04151600 | 0.04149500 | 0.04145400 | 0.04120800 | 0.04071700 | 0.04016400 | 0.03979100 | 0.03966900 | 0.03969400 | 0.03973700 | 0.03970400 | 0.03957300 |
| 0.06159200 | 0.06131200 | 0.06098800 | 0.06070200 | 0.06048000 | 0.06027900 | 0.06017900 | 0.06031400 | 0.06053100 | 0.06047200 | 0.06007600 | 0.05961800 | 0.05928900 | 0.05910600 |
| 0.05778800 | 0.05767500 | 0.05738500 | 0.05709600 | 0.05684500 | 0.05658300 | 0.05634400 | 0.05624700 | 0.05627200 | 0.05616400 | 0.05581900 | 0.05551700 | 0.05542200 | 0.05535100 |
| 0.04110600 | 0.04074600 | 0.04041000 | 0.04021200 | 0.04013000 | 0.04006600 | 0.04000000 | 0.03998000 | 0.03994100 | 0.03981300 | 0.03970100 | 0.03962200 | 0.03943400 | 0.03921900 |
| 0.05641800 | 0.05620300 | 0.05602000 | 0.05579400 | 0.05555400 | 0.05537100 | 0.05515500 | 0.05489100 | 0.05474500 | 0.05469900 | 0.05452400 | 0.05417400 | 0.05381400 | 0.05363000 |
| 0.05879500 | 0.05839400 | 0.05810700 | 0.05792200 | 0.05776800 | 0.05762600 | 0.05741000 | 0.05709300 | 0.05680300 | 0.05660700 | 0.05644300 | 0.05627000 | 0.05613500 | 0.05611400 |
| 0.04654600 | 0.04637900 | 0.04620600 | 0.04600600 | 0.04581300 | 0.04560900 | 0.04535100 | 0.04514400 | 0.04505100 | 0.04488300 | 0.04455800 | 0.04430200 | 0.04422800 | 0.04420900 |
| 0.04822800 | 0.04793600 | 0.04776700 | 0.04764100 | 0.04744200 | 0.04711400 | 0.04667300 | 0.04627400 | 0.04607300 | 0.04601700 | 0.04598000 | 0.04595500 | 0.04592600 | 0.04583200 |
| 0.05288100 | 0.05275100 | 0.05259900 | 0.05233700 | 0.05198100 | 0.05167700 | 0.05149600 | 0.05135500 | 0.05117600 | 0.05095000 | 0.05072100 | 0.05055500 | 0.05047500 | 0.05050000 |
| 0.06068500 | 0.06014800 | 0.05973000 | 0.05957500 | 0.05955300 | 0.05945000 | 0.05915800 | 0.05877800 | 0.05851700 | 0.05839100 | 0.05819800 | 0.05786600 | 0.05759500 | 0.05758200 |
| 0.04790900 | 0.04771300 | 0.04751000 | 0.04735000 | 0.04725100 | 0.04715800 | 0.04705300 | 0.04691200 | 0.04670900 | 0.04654100 | 0.04654300 | 0.04661000 | 0.04643600 | 0.04601200 |
| 0.04629800 | 0.04600700 | 0.04563800 | 0.04550600 | 0.04557600 | 0.04542000 | 0.04497400 | 0.04465200 | 0.04459800 | 0.04455700 | 0.04443300 | 0.04438100 | 0.04442600 | 0.04441800 |
| 0.03184100 | 0.03182500 | 0.03172800 | 0.03158300 | 0.03148300 | 0.03140000 | 0.03121700 | 0.03096600 | 0.03079500 | 0.03074800 | 0.03074900 | 0.03072700 | 0.03064400 | 0.03052000 |
| 0.03447300 | 0.03436900 | 0.03412800 | 0.03379900 | 0.03355500 | 0.03342200 | 0.03325400 | 0.03307000 | 0.03299700 | 0.03290600 | 0.03266200 | 0.03242800 | 0.03231700 | 0.03223000 |
| 0.04057600 | 0.04038000 | 0.04014300 | 0.03992900 | 0.03976100 | 0.03962300 | 0.03950500 | 0.03934300 | 0.03904100 | 0.03863300 | 0.03829500 | 0.03816500 | 0.03816000 | 0.03812700 |

| 8452       | 8454       | 8456       | 8458       | 8460       | 8462       | 8463       | 8465       | 8467       | 8469       | 8471       | 8473       | 8475       | 8477       |
|------------|------------|------------|------------|------------|------------|------------|------------|------------|------------|------------|------------|------------|------------|
| 0.04700000 | 0.04703400 | 0.04699000 | 0.04681100 | 0.04652100 | 0.04618000 | 0.04584200 | 0.04555600 | 0.04538400 | 0.04534200 | 0.04536700 | 0.04537100 | 0.04529500 | 0.04518200 |
| 0.03939100 | 0.03919500 | 0.03903600 | 0.03895500 | 0.03883600 | 0.03855100 | 0.03821700 | 0.03799500 | 0.03788000 | 0.03782800 | 0.03780000 | 0.03775100 | 0.03771200 | 0.03772900 |
| 0.05905400 | 0.05905300 | 0.05898700 | 0.05882900 | 0.05864400 | 0.05848300 | 0.05832800 | 0.05814500 | 0.05797300 | 0.05790700 | 0.05792800 | 0.05790800 | 0.05784400 | 0.05779400 |
| 0.05522200 | 0.05515800 | 0.05516300 | 0.05508400 | 0.05486300 | 0.05461800 | 0.05441000 | 0.05422500 | 0.05414600 | 0.05420100 | 0.05428500 | 0.05434400 | 0.05434800 | 0.05423500 |
| 0.03918600 | 0.03926300 | 0.03926500 | 0.03914800 | 0.03891000 | 0.03864500 | 0.03856500 | 0.03869100 | 0.03881500 | 0.03879500 | 0.03870700 | 0.03868000 | 0.03872600 | 0.03878700 |
| 0.05369100 | 0.05378900 | 0.05369000 | 0.05353200 | 0.05349400 | 0.05342300 | 0.05314200 | 0.05276700 | 0.05250900 | 0.05239500 | 0.05229900 | 0.05215400 | 0.05201500 | 0.05200400 |
| 0.05619500 | 0.05623600 | 0.05610400 | 0.05581400 | 0.05549200 | 0.05526400 | 0.05517000 | 0.05512900 | 0.05501800 | 0.05482600 | 0.05470300 | 0.05475200 | 0.05479100 | 0.05457900 |
| 0.04418500 | 0.04418900 | 0.04422200 | 0.04425700 | 0.04422500 | 0.04403300 | 0.04365200 | 0.04322600 | 0.04300100 | 0.04299500 | 0.04302800 | 0.04310100 | 0.04327500 | 0.04342200 |
| 0.04567200 | 0.04546300 | 0.04520800 | 0.04496900 | 0.04481900 | 0.04475000 | 0.04471200 | 0.04466000 | 0.04456300 | 0.04448200 | 0.04448500 | 0.04446900 | 0.04433900 | 0.04414700 |
| 0.05064600 | 0.05073500 | 0.05054200 | 0.05019200 | 0.04998100 | 0.04991600 | 0.04979400 | 0.04960200 | 0.04945300 | 0.04934600 | 0.04928000 | 0.04932300 | 0.04939600 | 0.04935700 |
| 0.05779100 | 0.05799600 | 0.05801800 | 0.05782500 | 0.05742400 | 0.05691500 | 0.05659100 | 0.05660400 | 0.05668300 | 0.05657100 | 0.05645500 | 0.05657900 | 0.05670500 | 0.05648300 |
| 0.04571600 | 0.04567700 | 0.04566600 | 0.04563100 | 0.04566900 | 0.04564800 | 0.04537700 | 0.04493300 | 0.04458700 | 0.04451100 | 0.04458700 | 0.04458900 | 0.04450400 | 0.04448200 |
| 0.04429600 | 0.04406500 | 0.04372000 | 0.04335100 | 0.04311900 | 0.04306700 | 0.04308200 | 0.04305200 | 0.04301700 | 0.04305900 | 0.04310900 | 0.04302800 | 0.04281800 | 0.04260300 |
| 0.03042700 | 0.03037900 | 0.03034100 | 0.03031300 | 0.03027300 | 0.03018400 | 0.03009300 | 0.03009700 | 0.03018900 | 0.03022700 | 0.03014000 | 0.03004200 | 0.03001900 | 0.02998400 |
| 0.03216500 | 0.03220300 | 0.03233300 | 0.03245900 | 0.03249900 | 0.03246400 | 0.03243700 | 0.03245300 | 0.03244900 | 0.03232900 | 0.03210100 | 0.03191700 | 0.03185500 | 0.03179800 |
| 0.03809800 | 0.03812600 | 0.03811200 | 0.03801700 | 0.03795600 | 0.03798600 | 0.03797500 | 0.03780900 | 0.03761300 | 0.03754200 | 0.03759900 | 0.03776000 | 0.03792100 | 0.03787800 |

| 8479       | 8481       | 8483       | 8485       | 8487       | 8489       | 8490       | 8492       | 8494       | 8496       | 8498       | 8500       | 8502       | 8504       |
|------------|------------|------------|------------|------------|------------|------------|------------|------------|------------|------------|------------|------------|------------|
| 0.04517300 | 0.04534000 | 0.04559100 | 0.04577400 | 0.04576700 | 0.04556900 | 0.04539100 | 0.04548400 | 0.04583700 | 0.04626600 | 0.04671700 | 0.04724000 | 0.04781000 | 0.04830500 |
| 0.03780200 | 0.03794200 | 0.03810500 | 0.03818400 | 0.03823400 | 0.03838700 | 0.03854700 | 0.03856500 | 0.03853900 | 0.03866000 | 0.03899100 | 0.03944700 | 0.03989800 | 0.04030500 |
| 0.05767500 | 0.05750000 | 0.05748000 | 0.05762300 | 0.05772000 | 0.05773300 | 0.05776200 | 0.05782400 | 0.05791400 | 0.05810900 | 0.05854100 | 0.05924200 | 0.06005200 | 0.06071800 |
| 0.05397800 | 0.05363800 | 0.05335600 | 0.05322700 | 0.05323800 | 0.05340500 | 0.05375300 | 0.05415500 | 0.05443000 | 0.05456100 | 0.05471200 | 0.05503700 | 0.05553600 | 0.05606500 |
| 0.03880000 | 0.03867700 | 0.03841000 | 0.03818400 | 0.03823400 | 0.03849600 | 0.03867600 | 0.03875500 | 0.03895400 | 0.03926100 | 0.03948600 | 0.03952700 | 0.03944500 | 0.03949200 |
| 0.05216000 | 0.05234600 | 0.05242400 | 0.05242500 | 0.05246400 | 0.05258600 | 0.05271300 | 0.05279200 | 0.05293300 | 0.05321000 | 0.05352700 | 0.05383200 | 0.05422500 | 0.05473400 |
| 0.05423500 | 0.05406300 | 0.05413100 | 0.05433100 | 0.05459200 | 0.05487300 | 0.05509400 | 0.05518500 | 0.05518400 | 0.05524100 | 0.05549100 | 0.05594800 | 0.05652400 | 0.05717000 |
| 0.04344400 | 0.04341700 | 0.04339200 | 0.04335400 | 0.04332600 | 0.04335000 | 0.04344200 | 0.04358900 | 0.04371900 | 0.04383200 | 0.04405400 | 0.04441900 | 0.04484400 | 0.04531100 |
| 0.04395900 | 0.04387900 | 0.04400000 | 0.04417800 | 0.04424600 | 0.04431400 | 0.04452400 | 0.04476900 | 0.04486800 | 0.04484900 | 0.04493800 | 0.04528000 | 0.04577600 | 0.04627000 |
| 0.04927600 | 0.04933600 | 0.04954600 | 0.04975900 | 0.04988500 | 0.04990400 | 0.04978000 | 0.04956000 | 0.04946700 | 0.04969700 | 0.05019200 | 0.05076200 | 0.05125900 | 0.05163300 |
| 0.05605300 | 0.05581200 | 0.05590200 | 0.05619900 | 0.05648900 | 0.05664800 | 0.05674000 | 0.05683000 | 0.05686400 | 0.05686000 | 0.05698200 | 0.05736000 | 0.05792300 | 0.05852400 |
| 0.04453400 | 0.04450900 | 0.04437500 | 0.04428200 | 0.04432400 | 0.04439700 | 0.04436900 | 0.04434700 | 0.04455800 | 0.04501600 | 0.04555800 | 0.04603500 | 0.04634000 | 0.04651400 |
| 0.04249600 | 0.04254300 | 0.04263600 | 0.04263600 | 0.04268200 | 0.04297800 | 0.04337100 | 0.04354500 | 0.04348800 | 0.04350500 | 0.04381500 | 0.04427900 | 0.04463200 | 0.04484200 |
| 0.02983100 | 0.02959700 | 0.02948100 | 0.02963700 | 0.02997000 | 0.03022900 | 0.03027400 | 0.03024200 | 0.03034600 | 0.03054700 | 0.03065600 | 0.03065900 | 0.03068800 | 0.03087500 |
| 0.03171400 | 0.03174700 | 0.03186500 | 0.03187200 | 0.03176600 | 0.03171500 | 0.03181300 | 0.03203400 | 0.03225600 | 0.03239400 | 0.03255400 | 0.03281500 | 0.03305300 | 0.03319800 |
| 0.03757700 | 0.03723100 | 0.03713200 | 0.03733700 | 0.03761200 | 0.03777500 | 0.03789400 | 0.03805300 | 0.03819300 | 0.03829500 | 0.03845600 | 0.03870600 | 0.03902300 | 0.03940100 |

| 8506       | 8508       | 8510       | 8512       | 8514       | 8516       | 8517       | 8519       | 8521       | 8523       | 8525       | 8527       | 8529       | 8531       |
|------------|------------|------------|------------|------------|------------|------------|------------|------------|------------|------------|------------|------------|------------|
| 0.04860500 | 0.04876100 | 0.04900000 | 0.04948400 | 0.05012000 | 0.05066100 | 0.05093800 | 0.05100300 | 0.05105300 | 0.05118900 | 0.05124300 | 0.05097400 | 0.05040100 | 0.04967100 |
| 0.04074400 | 0.04128700 | 0.04189000 | 0.04241200 | 0.04282100 | 0.04319800 | 0.04351400 | 0.04367900 | 0.04373900 | 0.04374800 | 0.04360100 | 0.04319300 | 0.04255400 | 0.04173000 |
| 0.06111800 | 0.06135100 | 0.06154400 | 0.06176500 | 0.06214600 | 0.06272700 | 0.06326600 | 0.06351400 | 0.06352700 | 0.06347400 | 0.06331400 | 0.06287800 | 0.06217400 | 0.06140700 |
| 0.05647200 | 0.05679400 | 0.05718800 | 0.05773800 | 0.05844500 | 0.05915000 | 0.05955500 | 0.05962500 | 0.05965900 | 0.05975300 | 0.05963600 | 0.05917300 | 0.05856200 | 0.05790700 |
| 0.03984100 | 0.04033100 | 0.04075900 | 0.04116000 | 0.04160200 | 0.04197300 | 0.04210600 | 0.04202200 | 0.04191500 | 0.04187700 | 0.04178200 | 0.04151900 | 0.04116600 | 0.04081600 |
| 0.05522600 | 0.05563300 | 0.05604000 | 0.05654400 | 0.05711000 | 0.05752500 | 0.05765000 | 0.05769000 | 0.05792200 | 0.05825300 | 0.05829300 | 0.05780100 | 0.05691800 | 0.05594800 |
| 0.05787800 | 0.05855400 | 0.05907900 | 0.05941600 | 0.05960700 | 0.05974200 | 0.05988300 | 0.06008700 | 0.06042800 | 0.06081100 | 0.06095300 | 0.06065300 | 0.05993700 | 0.05898400 |
| 0.04580500 | 0.04625500 | 0.04663100 | 0.04694300 | 0.04721800 | 0.04751300 | 0.04785800 | 0.04818200 | 0.04836300 | 0.04837800 | 0.04827000 | 0.04803400 | 0.04763500 | 0.04700700 |
| 0.04680100 | 0.04745900 | 0.04812900 | 0.04869200 | 0.04919400 | 0.04961200 | 0.04980000 | 0.04976400 | 0.04971300 | 0.04977800 | 0.04977500 | 0.04944300 | 0.04886500 | 0.04824800 |
| 0.05197100 | 0.05233200 | 0.05265800 | 0.05297000 | 0.05338300 | 0.05389500 | 0.05436800 | 0.05469800 | 0.05489600 | 0.05493700 | 0.05468700 | 0.05415000 | 0.05355600 | 0.05303600 |
| 0.05916600 | 0.05990000 | 0.06061200 | 0.06116800 | 0.06156500 | 0.06187500 | 0.06217200 | 0.06241100 | 0.06246900 | 0.06238400 | 0.06225400 | 0.06202500 | 0.06155100 | 0.06073800 |
| 0.04680000 | 0.04738700 | 0.04815400 | 0.04880300 | 0.04922200 | 0.04954600 | 0.04987100 | 0.05010100 | 0.05014900 | 0.05006500 | 0.04990300 | 0.04961300 | 0.04908600 | 0.04830100 |
| 0.04509700 | 0.04556000 | 0.04616200 | 0.04665300 | 0.04695400 | 0.04725000 | 0.04764300 | 0.04798900 | 0.04817000 | 0.04817700 | 0.04798100 | 0.04757100 | 0.04702800 | 0.04643200 |
| 0.03125400 | 0.03169100 | 0.03199400 | 0.03211100 | 0.03217800 | 0.03238100 | 0.03269200 | 0.03287900 | 0.03284100 | 0.03272300 | 0.03264700 | 0.03255900 | 0.03240100 | 0.03217500 |
| 0.03340000 | 0.03380400 | 0.03428700 | 0.03459900 | 0.03479500 | 0.03507400 | 0.03528600 | 0.03522600 | 0.03508200 | 0.03507500 | 0.03507700 | 0.03487400 | 0.03449600 | 0.03410000 |
| 0.03978300 | 0.04012800 | 0.04040600 | 0.04058100 | 0.04081500 | 0.04123600 | 0.04157400 | 0.04161600 | 0.04159000 | 0.04171300 | 0.04186700 | 0.04183300 | 0.04140800 | 0.04051000 |



| 8533       | 8535       | 8537       | 8539       | 8541       | 8543       | 8544       | 8546       | 8548       | 8550       | 8552       | 8554       | 8556       | 8558       |
|------------|------------|------------|------------|------------|------------|------------|------------|------------|------------|------------|------------|------------|------------|
| 0.04882400 | 0.04798500 | 0.04731800 | 0.04673600 | 0.04613500 | 0.04561500 | 0.04516800 | 0.04466500 | 0.04416200 | 0.04379900 | 0.04361600 | 0.04355100 | 0.04347300 | 0.04337800 |
| 0.04080900 | 0.03996200 | 0.03921700 | 0.03849100 | 0.03785500 | 0.03739900 | 0.03702700 | 0.03665600 | 0.03634500 | 0.03617200 | 0.03612000 | 0.03604500 | 0.03581400 | 0.03549700 |
| 0.06078200 | 0.06029300 | 0.05973500 | 0.05901800 | 0.05827900 | 0.05761800 | 0.05701700 | 0.05652100 | 0.05624400 | 0.05618000 | 0.05618700 | 0.05613900 | 0.05602400 | 0.05591700 |
| 0.05713100 | 0.05633200 | 0.05568300 | 0.05513000 | 0.05456400 | 0.05400600 | 0.05349800 | 0.05304100 | 0.05268600 | 0.05247000 | 0.05231300 | 0.05211200 | 0.05188400 | 0.05176000 |
| 0.04043800 | 0.04000900 | 0.03959600 | 0.03924900 | 0.03893800 | 0.03868400 | 0.03854200 | 0.03843600 | 0.03827900 | 0.03807900 | 0.03782000 | 0.03754200 | 0.03733900 | 0.03719800 |
| 0.05512600 | 0.05458400 | 0.05423200 | 0.05382100 | 0.05327200 | 0.05275100 | 0.05236200 | 0.05201800 | 0.05166800 | 0.05134900 | 0.05103700 | 0.05067000 | 0.05030400 | 0.05007600 |
| 0.05802800 | 0.05726000 | 0.05669400 | 0.05614800 | 0.05547500 | 0.05476800 | 0.05419500 | 0.05376000 | 0.05338600 | 0.05308000 | 0.05289300 | 0.05281900 | 0.05282300 | 0.05289700 |
| 0.04615600 | 0.04530400 | 0.04462900 | 0.04409100 | 0.04366100 | 0.04337200 | 0.04316100 | 0.04290000 | 0.04255100 | 0.04217900 | 0.04186300 | 0.04166300 | 0.04156600 | 0.04149900 |
| 0.04756100 | 0.04680800 | 0.04613000 | 0.04550600 | 0.04483300 | 0.04415900 | 0.04355200 | 0.04302700 | 0.04263400 | 0.04242300 | 0.04235200 | 0.04230300 | 0.04219600 | 0.04212200 |
| 0.05252600 | 0.05197100 | 0.05132500 | 0.05061100 | 0.04997900 | 0.04946600 | 0.04897900 | 0.04853900 | 0.04827100 | 0.04821000 | 0.04819500 | 0.04804000 | 0.04781600 | 0.04775200 |
| 0.05972800 | 0.05888500 | 0.05836700 | 0.05796600 | 0.05746400 | 0.05683000 | 0.05617200 | 0.05566100 | 0.05537900 | 0.05523800 | 0.05511100 | 0.05498100 | 0.05491600 | 0.05487800 |
| 0.04741200 | 0.04659600 | 0.04585400 | 0.04516800 | 0.04470300 | 0.04456000 | 0.04450700 | 0.04425500 | 0.04382100 | 0.04340500 | 0.04309300 | 0.04287600 | 0.04274500 | 0.04266100 |
| 0.04583000 | 0.04527000 | 0.04471700 | 0.04410100 | 0.04347000 | 0.04295300 | 0.04255000 | 0.04216000 | 0.04177600 | 0.04143300 | 0.04111900 | 0.04091500 | 0.04092700 | 0.04100800 |
| 0.03185400 | 0.03148300 | 0.03112700 | 0.03069800 | 0.03016100 | 0.02969700 | 0.02939600 | 0.02912300 | 0.02885800 | 0.02873600 | 0.02876200 | 0.02884700 | 0.02888600 | 0.02876300 |
| 0.03373000 | 0.03335500 | 0.03295900 | 0.03248000 | 0.03192200 | 0.03146200 | 0.03123000 | 0.03113700 | 0.03110500 | 0.03116200 | 0.03123900 | 0.03119600 | 0.03101000 | 0.03080700 |
| 0.03948700 | 0.03886200 | 0.03863200 | 0.03834500 | 0.03776600 | 0.03709800 | 0.03664500 | 0.03648800 | 0.03652900 | 0.03666600 | 0.03678200 | 0.03676500 | 0.03663200 | 0.03644100 |

| 8560       | 8562       | 8564       | 8566       | 8568       | 8570       | 8571       | 8573       | 8575       | 8577       | 8579       | 8581       | 8583       | 8585       |
|------------|------------|------------|------------|------------|------------|------------|------------|------------|------------|------------|------------|------------|------------|
| 0.04337600 | 0.04342800 | 0.04349600 | 0.04366100 | 0.04382100 | 0.04379900 | 0.04370100 | 0.04374900 | 0.04395700 | 0.04421600 | 0.04451900 | 0.04494200 | 0.04549600 | 0.04609200 |
| 0.03532100 | 0.03546800 | 0.03587700 | 0.03620000 | 0.03620600 | 0.03613500 | 0.03624700 | 0.03636400 | 0.03627000 | 0.03617200 | 0.03642100 | 0.03706200 | 0.03782800 | 0.03846000 |
| 0.05584700 | 0.05577200 | 0.05569000 | 0.05556500 | 0.05543900 | 0.05556600 | 0.05598400 | 0.05631400 | 0.05634400 | 0.05632700 | 0.05661300 | 0.05721200 | 0.05782500 | 0.05831800 |
| 0.05181200 | 0.05195300 | 0.05205600 | 0.05207800 | 0.05205500 | 0.05206200 | 0.05217200 | 0.05242300 | 0.05276400 | 0.05310600 | 0.05343400 | 0.05376300 | 0.05409200 | 0.05450800 |
| 0.03709400 | 0.03709500 | 0.03718700 | 0.03729700 | 0.03749100 | 0.03785300 | 0.03821300 | 0.03830500 | 0.03814000 | 0.03797200 | 0.03798300 | 0.03818000 | 0.03850800 | 0.03891600 |
| 0.04997900 | 0.04994100 | 0.05007800 | 0.05047100 | 0.05086900 | 0.05103500 | 0.05110700 | 0.05124500 | 0.05135500 | 0.05140500 | 0.05154400 | 0.05178900 | 0.05211900 | 0.05266400 |
| 0.05300400 | 0.05307000 | 0.05303600 | 0.05291800 | 0.05288300 | 0.05304800 | 0.05329600 | 0.05348500 | 0.05358600 | 0.05364800 | 0.05377300 | 0.05400100 | 0.05433400 | 0.05482500 |
| 0.04142800 | 0.04137400 | 0.04138500 | 0.04149300 | 0.04169200 | 0.04196100 | 0.04220700 | 0.04228000 | 0.04222500 | 0.04232000 | 0.04268800 | 0.04312300 | 0.04349300 | 0.04391300 |
| 0.04217700 | 0.04221100 | 0.04208200 | 0.04193800 | 0.04197300 | 0.04214600 | 0.04231300 | 0.04246800 | 0.04268600 | 0.04294600 | 0.04323400 | 0.04363600 | 0.04419800 | 0.04480500 |
| 0.04789900 | 0.04805300 | 0.04797600 | 0.04771800 | 0.04761200 | 0.04784000 | 0.04823700 | 0.04857600 | 0.04876200 | 0.04885600 | 0.04898200 | 0.04915000 | 0.04935400 | 0.04967900 |
| 0.05470000 | 0.05442000 | 0.05433200 | 0.05452300 | 0.05477300 | 0.05497100 | 0.05519200 | 0.05541200 | 0.05554300 | 0.05569800 | 0.05610500 | 0.05672900 | 0.05728800 | 0.05764700 |
| 0.04257500 | 0.04249600 | 0.04246000 | 0.04252500 | 0.04276500 | 0.04311800 | 0.04338100 | 0.04346600 | 0.04350200 | 0.04365100 | 0.04396600 | 0.04431900 | 0.04456800 | 0.04480000 |
| 0.04098600 | 0.04097800 | 0.04109900 | 0.04118600 | 0.04118000 | 0.04125000 | 0.04139200 | 0.04145900 | 0.04151300 | 0.04171600 | 0.04206000 | 0.04246200 | 0.04291000 | 0.04336000 |
| 0.02858300 | 0.02860900 | 0.02885900 | 0.02911200 | 0.02932300 | 0.02959000 | 0.02979100 | 0.02972300 | 0.02947400 | 0.02932100 | 0.02942600 | 0.02970500 | 0.02996300 | 0.03018300 |
| 0.03075900 | 0.03088800 | 0.03101200 | 0.03095900 | 0.03083900 | 0.03089500 | 0.03109100 | 0.03116300 | 0.03105200 | 0.03094800 | 0.03104600 | 0.03138800 | 0.03187300 | 0.03232600 |
| 0.03619000 | 0.03600200 | 0.03606100 | 0.03624400 | 0.03630100 | 0.03630300 | 0.03641400 | 0.03660100 | 0.03683500 | 0.03714100 | 0.03743900 | 0.03767100 | 0.03791300 | 0.03820300 |

| 8587       | 8589       | 8591       | 8593       | 8595       | 8597       | 8598       | 8600       | 8602       | 8604       | 8606       | 8608       | 8610       | 8612       |
|------------|------------|------------|------------|------------|------------|------------|------------|------------|------------|------------|------------|------------|------------|
| 0.04656700 | 0.04679100 | 0.04684600 | 0.04692400 | 0.04709200 | 0.04729500 | 0.04739800 | 0.04726100 | 0.04693700 | 0.04662200 | 0.04645300 | 0.04644600 | 0.04646600 | 0.04626800 |
| 0.03884000 | 0.03895200 | 0.03898100 | 0.03924200 | 0.03974400 | 0.04010100 | 0.04007700 | 0.03987100 | 0.03974600 | 0.03966600 | 0.03943700 | 0.03903500 | 0.03867900 | 0.03852600 |
| 0.05879600 | 0.05922200 | 0.05946400 | 0.05956100 | 0.05959900 | 0.05956500 | 0.05947000 | 0.05938300 | 0.05932000 | 0.05924000 | 0.05914300 | 0.05903200 | 0.05883300 | 0.05850700 |
| 0.05506600 | 0.05556300 | 0.05572300 | 0.05561600 | 0.05558100 | 0.05573500 | 0.05589400 | 0.05590500 | 0.05577000 | 0.05555800 | 0.05533200 | 0.05513900 | 0.05494800 | 0.05467600 |
| 0.03935100 | 0.03971100 | 0.03984800 | 0.03971000 | 0.03950400 | 0.03949800 | 0.03965600 | 0.03975400 | 0.03964300 | 0.03931400 | 0.03896200 | 0.03879100 | 0.03873600 | 0.03867100 |
| 0.05337500 | 0.05390800 | 0.05412600 | 0.05424200 | 0.05439200 | 0.05452800 | 0.05458700 | 0.05452500 | 0.05435200 | 0.05415800 | 0.05399100 | 0.05379900 | 0.05351000 | 0.05315500 |
| 0.05539700 | 0.05586700 | 0.05622000 | 0.05655500 | 0.05685800 | 0.05699500 | 0.05688800 | 0.05664200 | 0.05646400 | 0.05644300 | 0.05647200 | 0.05642900 | 0.05627800 | 0.05600900 |
| 0.04434400 | 0.04457700 | 0.04465500 | 0.04474600 | 0.04485000 | 0.04492600 | 0.04494900 | 0.04487200 | 0.04473700 | 0.04458500 | 0.04438000 | 0.04416400 | 0.04396300 | 0.04367600 |
| 0.04525400 | 0.04548300 | 0.04568800 | 0.04605300 | 0.04647400 | 0.04670000 | 0.04659600 | 0.04622000 | 0.04578400 | 0.04552600 | 0.04549600 | 0.04552400 | 0.04545100 | 0.04526400 |
| 0.05009900 | 0.05044300 | 0.05068200 | 0.05096200 | 0.05136100 | 0.05181000 | 0.05215100 | 0.05223800 | 0.05200200 | 0.05149000 | 0.05095200 | 0.05068600 | 0.05066300 | 0.05058800 |
| 0.05785600 | 0.05797100 | 0.05806800 | 0.05819600 | 0.05833200 | 0.05846200 | 0.05856300 | 0.05854100 | 0.05838600 | 0.05821200 | 0.05803000 | 0.05777300 | 0.05751100 | 0.05731900 |
| 0.04513100 | 0.04549300 | 0.04577800 | 0.04594300 | 0.04603300 | 0.04616700 | 0.04633200 | 0.04637300 | 0.04621200 | 0.04591100 | 0.04564200 | 0.04551700 | 0.04548000 | 0.04547900 |
| 0.04370000 | 0.04388100 | 0.04397000 | 0.04413500 | 0.04449000 | 0.04486700 | 0.04499200 | 0.04487700 | 0.04470800 | 0.04456100 | 0.04442200 | 0.04423800 | 0.04395500 | 0.04363000 |
| 0.03046800 | 0.03074600 | 0.03085100 | 0.03080200 | 0.03074700 | 0.03072800 | 0.03064600 | 0.03048500 | 0.03038200 | 0.03037000 | 0.03037500 | 0.03041700 | 0.03052300 | 0.03061700 |
| 0.03254400 | 0.03245000 | 0.03227600 | 0.03231700 | 0.03254800 | 0.03280000 | 0.03302200 | 0.03316200 | 0.03314900 | 0.03302300 | 0.03285500 | 0.03270400 | 0.03269100 | 0.03281500 |
| 0.03845000 | 0.03859300 | 0.03871200 | 0.03883700 | 0.03884300 | 0.03872400 | 0.03864900 | 0.03865800 | 0.03868000 | 0.03874100 | 0.03887700 | 0.03895000 | 0.03872400 | 0.03826700 |

| 8614       | 8616       | 8618       | 8620       | 8622       | 8624       | 8625       | 8627       | 8629       | 8631       | 8633       | 8635       | 8637       | 8639       |
|------------|------------|------------|------------|------------|------------|------------|------------|------------|------------|------------|------------|------------|------------|
| 0.04584500 | 0.04548000 | 0.04528400 | 0.04511700 | 0.04497500 | 0.04492900 | 0.04487200 | 0.04469300 | 0.04449100 | 0.04439100 | 0.04436900 | 0.04439200 | 0.04453300 | 0.04484300 |
| 0.03843900 | 0.03819600 | 0.03778100 | 0.03736200 | 0.03704900 | 0.03680200 | 0.03661500 | 0.03657300 | 0.03668900 | 0.03684800 | 0.03690900 | 0.03685700 | 0.03684600 | 0.03697400 |
| 0.05817000 | 0.05791600 | 0.05773100 | 0.05763200 | 0.05763200 | 0.05764800 | 0.05762600 | 0.05756400 | 0.05743200 | 0.05723700 | 0.05702500 | 0.05685400 | 0.05682500 | 0.05700400 |
| 0.05436100 | 0.05413700 | 0.05397400 | 0.05375200 | 0.05353100 | 0.05340900 | 0.05324800 | 0.05295100 | 0.05274700 | 0.05280800 | 0.05289000 | 0.05275500 | 0.05262900 | 0.05283900 |
| 0.03860900 | 0.03855300 | 0.03847800 | 0.03842600 | 0.03838200 | 0.03825600 | 0.03809500 | 0.03803900 | 0.03810300 | 0.03812400 | 0.03792400 | 0.03762800 | 0.03760400 | 0.03791500 |
| 0.05286700 | 0.05263600 | 0.05233300 | 0.05205700 | 0.05198500 | 0.05201000 | 0.05189200 | 0.05157200 | 0.05127300 | 0.05127400 | 0.05149500 | 0.05168100 | 0.05185700 | 0.05210500 |
| 0.05566900 | 0.05535600 | 0.05510800 | 0.05492500 | 0.05474500 | 0.05450600 | 0.05431300 | 0.05424700 | 0.05417900 | 0.05398400 | 0.05376400 | 0.05378000 | 0.05413800 | 0.05456600 |
| 0.04337300 | 0.04320900 | 0.04306900 | 0.04291500 | 0.04290400 | 0.04290600 | 0.04266400 | 0.04232000 | 0.04226600 | 0.04252200 | 0.04269200 | 0.04258600 | 0.04241200 | 0.04235400 |
| 0.04499900 | 0.04469500 | 0.04444600 | 0.04434800 | 0.04433100 | 0.04419200 | 0.04389000 | 0.04361700 | 0.04350300 | 0.04342500 | 0.04327300 | 0.04317500 | 0.04326500 | 0.04347700 |
| 0.05036400 | 0.05012400 | 0.04989500 | 0.04965100 | 0.04946400 | 0.04930600 | 0.04903400 | 0.04867800 | 0.04847100 | 0.04851600 | 0.04866700 | 0.04881900 | 0.04899800 | 0.04919500 |
| 0.05708500 | 0.05670600 | 0.05636600 | 0.05630200 | 0.05637800 | 0.05629900 | 0.05605500 | 0.05583500 | 0.05576000 | 0.05579900 | 0.05582000 | 0.05587400 | 0.05618300 | 0.05666100 |
| 0.04545500 | 0.04522100 | 0.04475800 | 0.04436800 | 0.04425300 | 0.04421000 | 0.04400600 | 0.04375800 | 0.04368500 | 0.04374600 | 0.04373800 | 0.04365700 | 0.04377200 | 0.04419700 |
| 0.04332500 | 0.04298200 | 0.04253000 | 0.04207600 | 0.04187400 | 0.04199100 | 0.04218300 | 0.04225700 | 0.04229000 | 0.04238400 | 0.04246700 | 0.04241600 | 0.04227400 | 0.04226500 |
| 0.03056600 | 0.03027700 | 0.02984800 | 0.02955400 | 0.02954900 | 0.02966800 | 0.02967500 | 0.02953500 | 0.02935900 | 0.02924700 | 0.02924400 | 0.02936900 | 0.02962800 | 0.02993300 |
| 0.03285300 | 0.03266400 | 0.03238500 | 0.03222800 | 0.03219000 | 0.03209300 | 0.03190700 | 0.03172700 | 0.03157200 | 0.03143900 | 0.03135800 | 0.03138900 | 0.03161500 | 0.03199900 |
| 0.03795400 | 0.03789500 | 0.03786900 | 0.03777100 | 0.03761800 | 0.03739900 | 0.03715900 | 0.03694200 | 0.03674300 | 0.03664100 | 0.03670900 | 0.03687800 | 0.03704500 | 0.03720200 |

| 8641       | 8643       | 8645       | 8647       | 8649       | 8651       | 8652       | 8654       | 8656       | 8658       | 8660       | 8662       | 8664       | 8666       |
|------------|------------|------------|------------|------------|------------|------------|------------|------------|------------|------------|------------|------------|------------|
| 0.04518000 | 0.04531700 | 0.04529800 | 0.04537700 | 0.04557600 | 0.04573500 | 0.04583500 | 0.04596500 | 0.04619900 | 0.04659600 | 0.04711100 | 0.04754100 | 0.04776000 | 0.04797300 |
| 0.03716800 | 0.03736400 | 0.03755300 | 0.03767900 | 0.03772300 | 0.03777000 | 0.03791400 | 0.03819000 | 0.03854700 | 0.03896700 | 0.03950300 | 0.04003100 | 0.04036800 | 0.04061100 |
| 0.05730000 | 0.05758600 | 0.05785000 | 0.05804100 | 0.05800000 | 0.05778500 | 0.05777000 | 0.05815600 | 0.05869500 | 0.05908300 | 0.05936200 | 0.05975700 | 0.06033400 | 0.06098300 |
| 0.05324900 | 0.05351500 | 0.05363500 | 0.05378500 | 0.05397900 | 0.05416300 | 0.05437900 | 0.05469400 | 0.05505200 | 0.05534000 | 0.05557700 | 0.05591200 | 0.05643500 | 0.05706600 |
| 0.03827100 | 0.03846700 | 0.03851000 | 0.03847300 | 0.03841200 | 0.03838100 | 0.03847200 | 0.03867600 | 0.03888800 | 0.03913100 | 0.03940000 | 0.03952500 | 0.03951400 | 0.03967100 |
| 0.05226500 | 0.05225900 | 0.05230200 | 0.05258400 | 0.05299000 | 0.05327600 | 0.05338900 | 0.05344800 | 0.05355300 | 0.05376000 | 0.05407500 | 0.05440400 | 0.05467500 | 0.05496900 |
| 0.05474400 | 0.05468700 | 0.05462800 | 0.05472300 | 0.05493800 | 0.05515900 | 0.05536700 | 0.05565600 | 0.05607800 | 0.05655100 | 0.05694600 | 0.05718500 | 0.05728700 | 0.05744600 |
| 0.04241400 | 0.04259600 | 0.04291100 | 0.04324100 | 0.04339900 | 0.04338100 | 0.04336300 | 0.04348500 | 0.04380900 | 0.04432800 | 0.04485900 | 0.04510500 | 0.04509400 | 0.04524100 |
| 0.04363200 | 0.04365800 | 0.04370500 | 0.04390200 | 0.04416000 | 0.04440200 | 0.04470300 | 0.04509600 | 0.04546400 | 0.04574000 | 0.04606800 | 0.04654600 | 0.04699400 | 0.04726900 |
| 0.04937600 | 0.04950000 | 0.04949300 | 0.04940400 | 0.04938000 | 0.04943100 | 0.04954500 | 0.04982200 | 0.05027000 | 0.05077300 | 0.05121700 | 0.05150100 | 0.05170900 | 0.05211400 |
| 0.05690700 | 0.05681500 | 0.05665000 | 0.05657900 | 0.05665500 | 0.05692400 | 0.05729300 | 0.05759200 | 0.05778600 | 0.05801400 | 0.05842800 | 0.05897600 | 0.05940100 | 0.05959600 |
| 0.04459400 | 0.04462200 | 0.04445000 | 0.04440500 | 0.04450100 | 0.04468400 | 0.04501600 | 0.04539100 | 0.04560100 | 0.04575400 | 0.04609700 | 0.04658800 | 0.04705800 | 0.04747700 |
| 0.04250200 | 0.04278300 | 0.04287500 | 0.04283800 | 0.04287300 | 0.04302500 | 0.04322100 | 0.04342200 | 0.04364900 | 0.04398900 | 0.04445900 | 0.04485800 | 0.04503000 | 0.04523000 |
| 0.03007100 | 0.02989000 | 0.02952300 | 0.02932200 | 0.02946100 | 0.02969900 | 0.02977500 | 0.02978300 | 0.02992300 | 0.03018300 | 0.03041400 | 0.03048600 | 0.03041400 | 0.03046100 |
| 0.03229400 | 0.03228200 | 0.03204300 | 0.03180700 | 0.03170500 | 0.03181600 | 0.03212500 | 0.03246900 | 0.03271200 | 0.03283400 | 0.03288700 | 0.03298300 | 0.03319500 | 0.03344000 |
| 0.03745000 | 0.03774900 | 0.03783200 | 0.03767200 | 0.03764600 | 0.03791900 | 0.03824400 | 0.03844300 | 0.03857100 | 0.03869900 | 0.03879800 | 0.03878900 | 0.03872400 | 0.03881000 |

| 8668       | 8670       | 8672       | 8674       | 8676       | 8678       | 8679       | 8681       | 8683       | 8685       | 8687       | 8689       | 8691       | 8693       |
|------------|------------|------------|------------|------------|------------|------------|------------|------------|------------|------------|------------|------------|------------|
| 0.04843200 | 0.04903100 | 0.04952700 | 0.04994600 | 0.05042600 | 0.05094500 | 0.05150200 | 0.05217100 | 0.05285500 | 0.05345300 | 0.05406900 | 0.05474800 | 0.05538300 | 0.05597900 |
| 0.04099800 | 0.04158100 | 0.04219700 | 0.04271700 | 0.04318800 | 0.04364600 | 0.04412200 | 0.04470400 | 0.04533200 | 0.04590600 | 0.04657600 | 0.04747600 | 0.04838000 | 0.04905300 |
| 0.06155900 | 0.06195600 | 0.06223900 | 0.06261400 | 0.06310700 | 0.06358000 | 0.06411800 | 0.06481500 | 0.06547500 | 0.06602600 | 0.06670600 | 0.06753500 | 0.06821700 | 0.06863800 |
| 0.05762400 | 0.05795700 | 0.05810700 | 0.05830900 | 0.05868400 | 0.05920000 | 0.05992400 | 0.06086300 | 0.06171900 | 0.06230100 | 0.06280600 | 0.06337800 | 0.06388800 | 0.06431900 |
| 0.04019300 | 0.04077700 | 0.04101400 | 0.04106600 | 0.04129900 | 0.04166800 | 0.04205100 | 0.04244200 | 0.04275900 | 0.04299300 | 0.04327400 | 0.04370900 | 0.04419800 | 0.04455800 |
| 0.05537500 | 0.05584100 | 0.05633700 | 0.05692700 | 0.05753000 | 0.05795800 | 0.05832500 | 0.05892400 | 0.05976700 | 0.06064500 | 0.06145000 | 0.06222200 | 0.06300000 | 0.06370800 |
| 0.05790800 | 0.05862100 | 0.05924900 | 0.05971000 | 0.06023300 | 0.06088400 | 0.06155600 | 0.06215900 | 0.06265400 | 0.06317600 | 0.06383600 | 0.06448000 | 0.06498200 | 0.06543000 |
| 0.04576700 | 0.04640600 | 0.04685700 | 0.04724300 | 0.04780900 | 0.04847700 | 0.04911200 | 0.04980600 | 0.05051800 | 0.05096000 | 0.05108900 | 0.05121500 | 0.05154000 | 0.05207400 |
| 0.04751200 | 0.04782800 | 0.04817600 | 0.04869600 | 0.04944000 | 0.05007900 | 0.05049400 | 0.05099100 | 0.05171500 | 0.05253700 | 0.05334800 | 0.05409700 | 0.05476900 | 0.05537800 |
| 0.05279400 | 0.05345200 | 0.05378900 | 0.05396400 | 0.05435100 | 0.05497300 | 0.05567000 | 0.05641500 | 0.05714000 | 0.05775800 | 0.05833400 | 0.05887100 | 0.05925000 | 0.05951600 |
| 0.05980300 | 0.06022800 | 0.06074100 | 0.06124600 | 0.06183000 | 0.06244200 | 0.06299900 | 0.06356500 | 0.06420600 | 0.06495100 | 0.06571000 | 0.06625500 | 0.06661400 | 0.06711500 |
| 0.04785500 | 0.04819600 | 0.04854700 | 0.04898600 | 0.04956600 | 0.05023900 | 0.05093700 | 0.05163000 | 0.05226100 | 0.05283300 | 0.05341900 | 0.05397300 | 0.05439700 | 0.05480500 |
| 0.04585400 | 0.04676100 | 0.04737300 | 0.04755300 | 0.04768800 | 0.04799700 | 0.04847100 | 0.04908100 | 0.04972200 | 0.05034600 | 0.05100500 | 0.05163300 | 0.05214200 | 0.05261600 |
| 0.03086000 | 0.03139700 | 0.03174000 | 0.03200900 | 0.03244200 | 0.03291000 | 0.03322900 | 0.03346300 | 0.03369100 | 0.03389500 | 0.03411300 | 0.03440800 | 0.03469700 | 0.03493500 |
| 0.03365200 | 0.03391000 | 0.03424000 | 0.03459900 | 0.03495500 | 0.03521900 | 0.03541800 | 0.03571100 | 0.03608300 | 0.03640700 | 0.03671900 | 0.03712600 | 0.03756700 | 0.03789400 |
| 0.03917800 | 0.03972800 | 0.04028900 | 0.04086300 | 0.04150600 | 0.04205300 | 0.04239000 | 0.04266800 | 0.04300200 | 0.04341000 | 0.04394000 | 0.04450800 | 0.04494300 | 0.04520300 |

| 8695       | 8697       | 8699       | 8701       | 8703       | 8705       | 8706       | 8708       | 8710       | 8712       | 8714       | 8716       | 8718       | 8720       |
|------------|------------|------------|------------|------------|------------|------------|------------|------------|------------|------------|------------|------------|------------|
| 0.05661100 | 0.05720400 | 0.05771200 | 0.05833400 | 0.05913000 | 0.05977600 | 0.06014500 | 0.06059300 | 0.06138100 | 0.06236700 | 0.06333700 | 0.06418400 | 0.06490300 | 0.06560900 |
| 0.04955400 | 0.04994100 | 0.05023100 | 0.05066300 | 0.05146600 | 0.05247700 | 0.05335000 | 0.05391900 | 0.05429700 | 0.05473700 | 0.05536200 | 0.05612200 | 0.05703700 | 0.05818900 |
| 0.06907300 | 0.06976800 | 0.07051600 | 0.07107200 | 0.07168300 | 0.07254600 | 0.07333400 | 0.07384900 | 0.07442600 | 0.07537600 | 0.07655700 | 0.07754200 | 0.07817800 | 0.07885100 |
| 0.06485800 | 0.06551500 | 0.06613200 | 0.06676800 | 0.06760400 | 0.06857100 | 0.06945200 | 0.07020400 | 0.07095300 | 0.07178800 | 0.07260800 | 0.07321000 | 0.07360800 | 0.07415100 |
| 0.04488800 | 0.04539000 | 0.04599900 | 0.04658200 | 0.04710700 | 0.04752800 | 0.04778800 | 0.04793500 | 0.04808800 | 0.04837600 | 0.04889600 | 0.04952400 | 0.05002500 | 0.05043800 |
| 0.06422800 | 0.06455400 | 0.06486900 | 0.06537100 | 0.06602900 | 0.06665600 | 0.06720100 | 0.06777800 | 0.06841600 | 0.06911000 | 0.06995300 | 0.07086400 | 0.07161700 | 0.07235200 |
| 0.06594900 | 0.06659500 | 0.06731700 | 0.06800100 | 0.06862800 | 0.06926200 | 0.06990000 | 0.07053100 | 0.07123200 | 0.07208200 | 0.07304000 | 0.07390800 | 0.07458600 | 0.07536700 |
| 0.05273800 | 0.05327600 | 0.05352000 | 0.05374200 | 0.05430300 | 0.05511400 | 0.05580200 | 0.05622900 | 0.05655200 | 0.05698100 | 0.05762000 | 0.05838000 | 0.05914400 | 0.06003800 |
| 0.05588800 | 0.05629600 | 0.05670500 | 0.05725000 | 0.05801500 | 0.05892100 | 0.05971200 | 0.06030800 | 0.06093300 | 0.06175200 | 0.06265300 | 0.06340000 | 0.06397300 | 0.06469500 |
| 0.05991000 | 0.06051300 | 0.06116800 | 0.06178300 | 0.06240900 | 0.06299300 | 0.06338600 | 0.06366600 | 0.06410700 | 0.06483600 | 0.06579100 | 0.06678200 | 0.06760700 | 0.06840300 |
| 0.06782800 | 0.06846200 | 0.06892500 | 0.06943600 | 0.07010300 | 0.07082100 | 0.07152100 | 0.07225200 | 0.07300300 | 0.07372900 | 0.07454400 | 0.07555600 | 0.07662800 | 0.07760300 |
| 0.05540400 | 0.05608700 | 0.05655900 | 0.05692200 | 0.05754900 | 0.05840300 | 0.05916300 | 0.05979000 | 0.06039800 | 0.06102300 | 0.06177300 | 0.06268500 | 0.06358100 | 0.06446100 |
| 0.05317100 | 0.05370500 | 0.05405300 | 0.05434000 | 0.05482600 | 0.05552700 | 0.05628700 | 0.05703300 | 0.05775200 | 0.05844200 | 0.05912600 | 0.05976900 | 0.06038600 | 0.06113300 |
| 0.03528300 | 0.03577000 | 0.03615900 | 0.03636300 | 0.03656200 | 0.03686100 | 0.03718500 | 0.03743800 | 0.03762400 | 0.03788500 | 0.03834000 | 0.03890200 | 0.03937800 | 0.03975300 |
| 0.03811400 | 0.03837400 | 0.03874700 | 0.03919100 | 0.03967800 | 0.04011500 | 0.04039500 | 0.04065900 | 0.04108700 | 0.04159300 | 0.04207700 | 0.04250900 | 0.04283300 | 0.04315200 |
| 0.04543000 | 0.04579200 | 0.04626000 | 0.04671700 | 0.04716100 | 0.04761700 | 0.04809100 | 0.04864600 | 0.04926300 | 0.04982800 | 0.05028700 | 0.05061400 | 0.05086600 | 0.05133100 |

| 8722       | 8724       | 8726       | 8728       | 8730       | 8732       | 8733       | 8735       | 8737       | 8739       | 8741       | 8743       | 8745       | 8747       |
|------------|------------|------------|------------|------------|------------|------------|------------|------------|------------|------------|------------|------------|------------|
| 0.06643100 | 0.06738500 | 0.06843100 | 0.06954300 | 0.07067300 | 0.07173300 | 0.07262100 | 0.07329400 | 0.07386200 | 0.07449700 | 0.07523000 | 0.07592900 | 0.07650000 | 0.07699800 |
| 0.05947200 | 0.06060000 | 0.06144100 | 0.06215000 | 0.06294700 | 0.06388100 | 0.06481300 | 0.06564000 | 0.06641700 | 0.06714400 | 0.06778600 | 0.06840400 | 0.06898400 | 0.06952300 |
| 0.07981500 | 0.08079800 | 0.08162200 | 0.08245500 | 0.08342700 | 0.08445600 | 0.08532200 | 0.08591600 | 0.08638300 | 0.08689500 | 0.08751300 | 0.08823500 | 0.08897700 | 0.08961700 |
| 0.07511900 | 0.07631800 | 0.07736800 | 0.07823400 | 0.07916400 | 0.08019900 | 0.08114700 | 0.08194700 | 0.08269700 | 0.08350300 | 0.08439700 | 0.08525700 | 0.08592600 | 0.08641400 |
| 0.05093300 | 0.05148100 | 0.05204300 | 0.05269500 | 0.05343300 | 0.05411600 | 0.05457100 | 0.05478600 | 0.05503200 | 0.05556600 | 0.05630100 | 0.05700000 | 0.05758500 | 0.05808600 |
| 0.07342800 | 0.07478300 | 0.07596600 | 0.07669300 | 0.07719900 | 0.07787300 | 0.07871200 | 0.07959100 | 0.08059400 | 0.08162100 | 0.08239800 | 0.08291800 | 0.08332300 | 0.08376000 |
| 0.07658100 | 0.07798100 | 0.07904000 | 0.07966700 | 0.08022000 | 0.08100800 | 0.08198200 | 0.08287100 | 0.08353900 | 0.08410100 | 0.08473400 | 0.08548500 | 0.08627500 | 0.08707500 |
| 0.06113200 | 0.06211900 | 0.06275500 | 0.06327900 | 0.06404800 | 0.06499500 | 0.06579500 | 0.06648700 | 0.06734700 | 0.06825500 | 0.06890000 | 0.06934200 | 0.06978600 | 0.07022400 |
| 0.06580200 | 0.06709700 | 0.06822900 | 0.06911100 | 0.06990100 | 0.07071600 | 0.07149200 | 0.07211100 | 0.07264600 | 0.07333300 | 0.07424900 | 0.07523600 | 0.07611900 | 0.07685500 |
| 0.06942500 | 0.07051200 | 0.07135700 | 0.07195500 | 0.07253900 | 0.07328000 | 0.07411400 | 0.07494300 | 0.07580700 | 0.07671100 | 0.07756300 | 0.07828900 | 0.07884600 | 0.07925300 |
| 0.07851700 | 0.07940400 | 0.08020200 | 0.08094600 | 0.08179500 | 0.08277400 | 0.08361300 | 0.08411700 | 0.08458900 | 0.08542900 | 0.08658600 | 0.08777100 | 0.08881400 | 0.08963300 |
| 0.06551900 | 0.06668000 | 0.06771500 | 0.06863900 | 0.06955400 | 0.07041000 | 0.07110400 | 0.07164100 | 0.07216300 | 0.07285500 | 0.07377000 | 0.07472200 | 0.07543900 | 0.07592700 |
| 0.06203100 | 0.06296000 | 0.06395700 | 0.06502600 | 0.06596300 | 0.06670700 | 0.06732300 | 0.06780700 | 0.06832100 | 0.06908900 | 0.07002400 | 0.07091800 | 0.07168300 | 0.07225100 |
| 0.04016600 | 0.04063400 | 0.04106900 | 0.04146100 | 0.04185100 | 0.04231700 | 0.04287400 | 0.04331500 | 0.04348300 | 0.04359900 | 0.04396600 | 0.04458300 | 0.04523300 | 0.04574700 |
| 0.04365900 | 0.04432200 | 0.04495300 | 0.04546500 | 0.04594100 | 0.04645100 | 0.04683300 | 0.04693700 | 0.04701700 | 0.04746300 | 0.04828500 | 0.04911200 | 0.04960500 | 0.04983100 |
| 0.05218500 | 0.05313600 | 0.05383500 | 0.05440900 | 0.05519600 | 0.05606900 | 0.05653800 | 0.05658700 | 0.05677100 | 0.05743700 | 0.05838800 | 0.05922400 | 0.05975800 | 0.06015800 |



| 8749       | 8751       | 8753       | 8755       | 8757       | 8759       | 8760       | 8762       | 8764       | 8766       | 8768       | 8770       | 8772       | 8774       |
|------------|------------|------------|------------|------------|------------|------------|------------|------------|------------|------------|------------|------------|------------|
| 0.07754300 | 0.07819800 | 0.07894700 | 0.07977200 | 0.08062200 | 0.08132400 | 0.08175300 | 0.08202300 | 0.08229200 | 0.08255900 | 0.08284600 | 0.08329500 | 0.08384800 | 0.08421600 |
| 0.07016100 | 0.07082400 | 0.07125200 | 0.07153800 | 0.07205600 | 0.07285400 | 0.07356400 | 0.07399000 | 0.07439600 | 0.07499200 | 0.07560100 | 0.07606400 | 0.07643900 | 0.07675100 |
| 0.09020100 | 0.09091300 | 0.09178000 | 0.09259700 | 0.09317500 | 0.09352000 | 0.09377800 | 0.09416400 | 0.09480100 | 0.09548600 | 0.09591500 | 0.09612800 | 0.09636700 | 0.09666300 |
| 0.08680300 | 0.08712900 | 0.08750900 | 0.08820500 | 0.08928400 | 0.09031500 | 0.09078800 | 0.09089700 | 0.09131000 | 0.09208100 | 0.09266400 | 0.09294000 | 0.09324300 | 0.09361300 |
| 0.05842100 | 0.05847400 | 0.05842600 | 0.05867900 | 0.05931400 | 0.05994500 | 0.06021900 | 0.06025500 | 0.06044600 | 0.06095500 | 0.06159400 | 0.06213500 | 0.06248000 | 0.06263500 |
| 0.08434600 | 0.08497200 | 0.08546100 | 0.08592500 | 0.08653600 | 0.08716600 | 0.08762600 | 0.08803900 | 0.08860400 | 0.08923000 | 0.08968200 | 0.08990200 | 0.09003400 | 0.09026200 |
| 0.08791500 | 0.08870900 | 0.08931900 | 0.08978000 | 0.09022300 | 0.09063500 | 0.09090400 | 0.09111600 | 0.09157300 | 0.09239600 | 0.09330800 | 0.09396200 | 0.09431500 | 0.09450700 |
| 0.07061400 | 0.07110600 | 0.07184000 | 0.07266000 | 0.07327100 | 0.07360300 | 0.07377700 | 0.07388300 | 0.07403600 | 0.07437400 | 0.07484500 | 0.07531200 | 0.07574300 | 0.07604900 |
| 0.07756700 | 0.07835200 | 0.07905200 | 0.07948200 | 0.07971800 | 0.07992400 | 0.08020900 | 0.08071800 | 0.08148200 | 0.08225700 | 0.08281400 | 0.08315600 | 0.08343400 | 0.08384100 |
| 0.07961900 | 0.08001300 | 0.08040100 | 0.08082800 | 0.08141800 | 0.08203200 | 0.08232800 | 0.08236900 | 0.08260500 | 0.08314400 | 0.08374400 | 0.08431500 | 0.08482400 | 0.08516300 |
| 0.09021500 | 0.09068800 | 0.09113200 | 0.09145900 | 0.09173000 | 0.09222200 | 0.09294300 | 0.09361300 | 0.09415300 | 0.09463800 | 0.09500900 | 0.09522900 | 0.09544400 | 0.09576300 |
| 0.07643400 | 0.07702300 | 0.07759300 | 0.07821500 | 0.07890000 | 0.07974700 | 0.08028700 | 0.08069500 | 0.08114700 | 0.08160000 | 0.08192600 | 0.08223300 | 0.08271600 | 0.08326300 |
| 0.07260300 | 0.07283000 | 0.07310000 | 0.07355700 | 0.07417200 | 0.07480700 | 0.07533300 | 0.07564100 | 0.07582200 | 0.07612300 | 0.07660100 | 0.07717200 | 0.07775600 | 0.07819800 |
| 0.04607400 | 0.04625600 | 0.04644200 | 0.04673900 | 0.04707900 | 0.04732100 | 0.04739500 | 0.04737300 | 0.04743900 | 0.04771300 | 0.04812100 | 0.04844200 | 0.04858000 | 0.04863700 |
| 0.05011400 | 0.05052200 | 0.05089100 | 0.05124500 | 0.05169000 | 0.05210500 | 0.05224800 | 0.05214200 | 0.05221400 | 0.05273000 | 0.05334800 | 0.05367700 | 0.05379300 | 0.05384900 |
| 0.06061600 | 0.06105900 | 0.06141800 | 0.06182900 | 0.06229000 | 0.06255000 | 0.06258200 | 0.06271000 | 0.06313600 | 0.06368300 | 0.06407700 | 0.06427400 | 0.06443100 | 0.06461200 |

| 8776       | 8778       | 8780       | 8782       | 8784       | 8786       | 8787       | 8789       | 8791       | 8793       | 8795       | 8797       | 8799       | 8801       |
|------------|------------|------------|------------|------------|------------|------------|------------|------------|------------|------------|------------|------------|------------|
| 0.08439300 | 0.08465900 | 0.08497700 | 0.08509000 | 0.08506300 | 0.08505400 | 0.08499800 | 0.08491700 | 0.08491100 | 0.08481200 | 0.08442000 | 0.08389700 | 0.08354200 | 0.08335300 |
| 0.07693100 | 0.07699200 | 0.07709100 | 0.07734700 | 0.07760500 | 0.07763200 | 0.07742000 | 0.07710300 | 0.07674400 | 0.07633800 | 0.07593800 | 0.07563200 | 0.07541400 | 0.07523100 |
| 0.09692600 | 0.09723300 | 0.09763000 | 0.09792700 | 0.09795900 | 0.09780300 | 0.09758200 | 0.09738000 | 0.09736200 | 0.09753000 | 0.09754600 | 0.09717000 | 0.09660100 | 0.09620200 |
| 0.09385800 | 0.09399200 | 0.09411500 | 0.09420500 | 0.09422000 | 0.09415800 | 0.09396200 | 0.09368800 | 0.09359500 | 0.09373900 | 0.09375300 | 0.09331200 | 0.09259200 | 0.09203900 |
| 0.06269100 | 0.06274000 | 0.06278300 | 0.06285700 | 0.06303900 | 0.06313000 | 0.06287100 | 0.06246600 | 0.06228900 | 0.06231500 | 0.06226300 | 0.06199900 | 0.06162500 | 0.06136700 |
| 0.09059700 | 0.09096500 | 0.09142100 | 0.09194400 | 0.09229800 | 0.09231600 | 0.09202700 | 0.09159100 | 0.09125100 | 0.09110000 | 0.09095300 | 0.09062300 | 0.09021700 | 0.08998400 |
| 0.09462200 | 0.09478100 | 0.09506700 | 0.09540100 | 0.09570400 | 0.09590100 | 0.09587600 | 0.09563900 | 0.09535800 | 0.09510400 | 0.09471400 | 0.09406100 | 0.09336500 | 0.09297500 |
| 0.07613800 | 0.07614200 | 0.07619400 | 0.07628300 | 0.07641800 | 0.07653700 | 0.07648300 | 0.07631000 | 0.07622800 | 0.07619200 | 0.07593300 | 0.07541500 | 0.07497500 | 0.07489800 |
| 0.08440000 | 0.08483000 | 0.08491300 | 0.08482600 | 0.08485700 | 0.08498300 | 0.08494800 | 0.08469800 | 0.08448400 | 0.08446800 | 0.08441200 | 0.08399200 | 0.08325300 | 0.08251400 |
| 0.08538100 | 0.08569400 | 0.08617900 | 0.08658800 | 0.08661900 | 0.08634200 | 0.08599900 | 0.08562400 | 0.08526100 | 0.08504300 | 0.08484300 | 0.08448900 | 0.08418500 | 0.08421100 |
| 0.09606500 | 0.09618700 | 0.09616600 | 0.09615900 | 0.09627400 | 0.09644200 | 0.09645400 | 0.09623900 | 0.09594900 | 0.09572200 | 0.09555500 | 0.09531400 | 0.09494800 | 0.09471300 |
| 0.08359600 | 0.08365000 | 0.08353400 | 0.08340400 | 0.08346300 | 0.08375300 | 0.08404500 | 0.08416600 | 0.08415600 | 0.08400000 | 0.08359500 | 0.08301900 | 0.08249600 | 0.08218900 |
| 0.07843100 | 0.07858900 | 0.07875700 | 0.07888000 | 0.07889400 | 0.07871500 | 0.07832600 | 0.07792700 | 0.07777400 | 0.07787500 | 0.07796000 | 0.07772200 | 0.07718800 | 0.07681600 |
| 0.04868100 | 0.04876000 | 0.04892300 | 0.04910500 | 0.04927100 | 0.04945900 | 0.04962200 | 0.04971800 | 0.04972600 | 0.04953800 | 0.04909700 | 0.04853800 | 0.04808000 | 0.04792600 |
| 0.05380300 | 0.05369700 | 0.05366100 | 0.05366000 | 0.05366400 | 0.05378900 | 0.05401900 | 0.05414800 | 0.05407500 | 0.05388300 | 0.05366500 | 0.05339400 | 0.05301900 | 0.05268100 |
| 0.06469300 | 0.06463900 | 0.06466100 | 0.06487600 | 0.06510100 | 0.06510800 | 0.06495000 | 0.06490900 | 0.06507900 | 0.06517400 | 0.06487900 | 0.06424700 | 0.06371400 | 0.06366600 |

| 8803       | 8805       | 8807       | 8809       | 8811       | 8813       | 8814       | 8816       | 8818       | 8820       | 8822       | 8824       | 8826       | 8828       |
|------------|------------|------------|------------|------------|------------|------------|------------|------------|------------|------------|------------|------------|------------|
| 0.08313600 | 0.08282400 | 0.08241500 | 0.08184300 | 0.08113300 | 0.08048000 | 0.08005300 | 0.07981300 | 0.07955500 | 0.07916400 | 0.07873900 | 0.07830000 | 0.07766200 | 0.07683400 |
| 0.07507100 | 0.07490500 | 0.07465000 | 0.07423800 | 0.07367700 | 0.07308200 | 0.07259600 | 0.07220000 | 0.07170200 | 0.07105800 | 0.07044900 | 0.06993600 | 0.06943000 | 0.06894400 |
| 0.09603000 | 0.09578500 | 0.09525100 | 0.09450600 | 0.09374600 | 0.09313900 | 0.09269400 | 0.09222500 | 0.09161600 | 0.09100200 | 0.09054700 | 0.09016700 | 0.08968300 | 0.08909700 |
| 0.09172900 | 0.09131400 | 0.09061800 | 0.08981800 | 0.08916300 | 0.08878900 | 0.08863300 | 0.08853400 | 0.08832700 | 0.08786300 | 0.08720000 | 0.08657100 | 0.08600200 | 0.08539800 |
| 0.06130100 | 0.06118600 | 0.06073500 | 0.05999400 | 0.05930300 | 0.05893000 | 0.05882800 | 0.05879000 | 0.05868500 | 0.05851800 | 0.05839600 | 0.05834000 | 0.05812100 | 0.05754800 |
| 0.08986500 | 0.08955900 | 0.08891000 | 0.08799300 | 0.08711400 | 0.08655900 | 0.08617800 | 0.08571800 | 0.08528600 | 0.08507300 | 0.08500900 | 0.08482400 | 0.08430400 | 0.08352300 |
| 0.09291000 | 0.09283000 | 0.09241500 | 0.09165900 | 0.09089100 | 0.09044800 | 0.09023500 | 0.08990100 | 0.08935900 | 0.08874200 | 0.08812000 | 0.08758700 | 0.08727300 | 0.08709800 |
| 0.07499300 | 0.07477300 | 0.07407700 | 0.07319800 | 0.07248800 | 0.07209900 | 0.07187600 | 0.07154500 | 0.07116700 | 0.07104400 | 0.07118900 | 0.07122600 | 0.07086100 | 0.07023500 |
| 0.08200500 | 0.08168700 | 0.08128900 | 0.08057200 | 0.07972100 | 0.07918800 | 0.07904100 | 0.07891500 | 0.07856500 | 0.07810400 | 0.07775400 | 0.07753400 | 0.07723100 | 0.07666800 |
| 0.08449000 | 0.08469300 | 0.08449500 | 0.08366600 | 0.08239700 | 0.08139700 | 0.08105900 | 0.08095500 | 0.08064100 | 0.08033700 | 0.08034900 | 0.08040400 | 0.08000400 | 0.07909700 |
| 0.09471600 | 0.09451700 | 0.09378800 | 0.09285300 | 0.09220600 | 0.09187900 | 0.09158600 | 0.09123800 | 0.09086800 | 0.09038400 | 0.08978100 | 0.08921500 | 0.08877800 | 0.08849400 |
| 0.08207400 | 0.08185600 | 0.08121100 | 0.08022300 | 0.07933500 | 0.07876900 | 0.07839900 | 0.07811400 | 0.07778500 | 0.07725000 | 0.07662300 | 0.07617900 | 0.07593600 | 0.07558900 |
| 0.07679600 | 0.07665100 | 0.07600900 | 0.07511800 | 0.07440800 | 0.07409800 | 0.07408100 | 0.07399800 | 0.07359400 | 0.07298800 | 0.07246300 | 0.07203600 | 0.07157100 | 0.07114800 |
| 0.04807000 | 0.04821800 | 0.04805900 | 0.04749400 | 0.04672400 | 0.04617800 | 0.04605500 | 0.04612600 | 0.04612200 | 0.04603200 | 0.04596200 | 0.04583700 | 0.04551300 | 0.04508900 |
| 0.05256300 | 0.05261100 | 0.05260700 | 0.05237200 | 0.05195500 | 0.05163400 | 0.05147700 | 0.05121000 | 0.05074000 | 0.05037600 | 0.05036200 | 0.05046800 | 0.05030100 | 0.04992200 |
| 0.06396400 | 0.06406000 | 0.06358200 | 0.06269900 | 0.06194400 | 0.06162200 | 0.06152400 | 0.06128100 | 0.06079100 | 0.06040300 | 0.06047400 | 0.06068100 | 0.06047700 | 0.05990700 |

| 8830       | 8832       | 8834       | 8836       | 8838       | 8840       | 8841       | 8843       | 8845       | 8847       | 8849       | 8851       | 8853       | 8855       |
|------------|------------|------------|------------|------------|------------|------------|------------|------------|------------|------------|------------|------------|------------|
| 0.07612400 | 0.07563900 | 0.07511100 | 0.07440400 | 0.07371400 | 0.07310400 | 0.07239500 | 0.07159100 | 0.07084600 | 0.07011200 | 0.06923200 | 0.06820800 | 0.06712300 | 0.06601600 |
| 0.06858300 | 0.06831000 | 0.06795000 | 0.06739200 | 0.06664300 | 0.06579900 | 0.06504100 | 0.06442100 | 0.06372900 | 0.06277800 | 0.06170200 | 0.06071500 | 0.05975300 | 0.05870400 |
| 0.08855500 | 0.08813400 | 0.08774100 | 0.08724500 | 0.08670200 | 0.08626500 | 0.08587400 | 0.08532200 | 0.08453700 | 0.08348600 | 0.08223500 | 0.08112700 | 0.08030500 | 0.07943000 |
| 0.08487400 | 0.08453600 | 0.08423500 | 0.08382400 | 0.08329400 | 0.08261900 | 0.08180900 | 0.08098700 | 0.08016700 | 0.07917300 | 0.07793700 | 0.07668600 | 0.07568900 | 0.07499700 |
| 0.05686400 | 0.05645500 | 0.05628600 | 0.05606600 | 0.05574500 | 0.05549500 | 0.05534400 | 0.05509800 | 0.05459100 | 0.05381100 | 0.05286600 | 0.05192900 | 0.05106000 | 0.05026000 |
| 0.08277300 | 0.08227700 | 0.08199400 | 0.08169400 | 0.08117400 | 0.08034700 | 0.07932800 | 0.07843400 | 0.07777600 | 0.07702400 | 0.07598100 | 0.07496300 | 0.07414300 | 0.07327400 |
| 0.08683800 | 0.08637100 | 0.08564900 | 0.08470500 | 0.08375000 | 0.08304900 | 0.08266900 | 0.08238600 | 0.08184000 | 0.08084700 | 0.07955400 | 0.07833500 | 0.07746100 | 0.07682900 |
| 0.06962500 | 0.06901900 | 0.06836000 | 0.06790900 | 0.06781100 | 0.06760800 | 0.06685700 | 0.06580600 | 0.06488000 | 0.06406900 | 0.06326600 | 0.06259700 | 0.06204600 | 0.06139400 |
| 0.07592200 | 0.07522100 | 0.07463900 | 0.07403900 | 0.07335900 | 0.07272000 | 0.07219600 | 0.07168700 | 0.07099900 | 0.06999400 | 0.06876100 | 0.06757400 | 0.06656700 | 0.06571700 |
| 0.07808600 | 0.07730500 | 0.07674800 | 0.07632600 | 0.07601800 | 0.07570000 | 0.07520900 | 0.07452200 | 0.07366200 | 0.07266900 | 0.07169800 | 0.07090500 | 0.07022600 | 0.06944900 |
| 0.08831100 | 0.08804100 | 0.08757700 | 0.08701500 | 0.08643600 | 0.08581000 | 0.08508300 | 0.08418700 | 0.08313400 | 0.08198800 | 0.08074900 | 0.07950500 | 0.07842500 | 0.07750500 |
| 0.07493800 | 0.07423500 | 0.07376100 | 0.07341900 | 0.07304400 | 0.07264200 | 0.07217900 | 0.07147000 | 0.07039900 | 0.06909400 | 0.06783300 | 0.06686600 | 0.06619600 | 0.06558500 |
| 0.07088600 | 0.07065900 | 0.07022800 | 0.06948900 | 0.06862400 | 0.06798700 | 0.06764700 | 0.06722700 | 0.06642600 | 0.06536600 | 0.06431500 | 0.06347900 | 0.06293500 | 0.06247200 |
| 0.04476400 | 0.04452400 | 0.04418900 | 0.04369600 | 0.04326400 | 0.04315500 | 0.04323100 | 0.04311200 | 0.04271800 | 0.04217000 | 0.04149400 | 0.04082000 | 0.04034400 | 0.04004900 |
| 0.04969400 | 0.04963400 | 0.04946800 | 0.04908000 | 0.04854400 | 0.04803600 | 0.04770600 | 0.04739000 | 0.04681200 | 0.04598500 | 0.04511800 | 0.04438800 | 0.04387000 | 0.04354100 |
| 0.05930100 | 0.05876500 | 0.05828500 | 0.05779900 | 0.05724000 | 0.05666400 | 0.05614500 | 0.05567400 | 0.05523400 | 0.05475300 | 0.05410900 | 0.05335700 | 0.05267000 | 0.05216100 |

| 8857       | 8859       | 8861       | 8863       | 8865       | 8867       | 8868       | 8870       | 8872       | 8874       | 8876       | 8878       | 8880       | 8882       |
|------------|------------|------------|------------|------------|------------|------------|------------|------------|------------|------------|------------|------------|------------|
| 0.06498100 | 0.06413100 | 0.06340300 | 0.06265800 | 0.06190200 | 0.06119800 | 0.06047100 | 0.05964400 | 0.05885000 | 0.05820400 | 0.05754000 | 0.05671900 | 0.05579900 | 0.05484300 |
| 0.05769700 | 0.05682700 | 0.05601100 | 0.05523200 | 0.05453600 | 0.05387800 | 0.05313600 | 0.05224300 | 0.05125800 | 0.05025900 | 0.04930400 | 0.04855700 | 0.04811200 | 0.04773700 |
| 0.07836900 | 0.07742700 | 0.07670900 | 0.07602500 | 0.07532600 | 0.07460200 | 0.07367600 | 0.07256200 | 0.07149900 | 0.07055100 | 0.06966300 | 0.06886000 | 0.06806600 | 0.06719300 |
| 0.07443900 | 0.07374800 | 0.07280200 | 0.07167700 | 0.07049500 | 0.06942700 | 0.06867400 | 0.06821600 | 0.06772000 | 0.06696800 | 0.06614800 | 0.06539800 | 0.06442500 | 0.06311800 |
| 0.04969900 | 0.04944900 | 0.04922400 | 0.04874700 | 0.04813400 | 0.04765000 | 0.04731900 | 0.04699800 | 0.04656000 | 0.04593100 | 0.04521200 | 0.04461800 | 0.04415700 | 0.04368300 |
| 0.07236000 | 0.07164300 | 0.07096500 | 0.07003200 | 0.06902800 | 0.06827100 | 0.06767300 | 0.06695000 | 0.06599500 | 0.06492100 | 0.06395400 | 0.06315900 | 0.06230800 | 0.06133300 |
| 0.07614700 | 0.07528500 | 0.07426200 | 0.07316900 | 0.07215000 | 0.07120000 | 0.07026200 | 0.06946100 | 0.06882900 | 0.06814100 | 0.06728400 | 0.06635500 | 0.06536400 | 0.06436000 |
| 0.06062500 | 0.05983700 | 0.05894700 | 0.05789500 | 0.05689700 | 0.05621900 | 0.05581900 | 0.05544100 | 0.05490300 | 0.05409800 | 0.05304400 | 0.05206900 | 0.05143400 | 0.05099500 |
| 0.06503900 | 0.06444000 | 0.06365700 | 0.06260800 | 0.06149700 | 0.06054100 | 0.05977500 | 0.05906200 | 0.05824000 | 0.05729900 | 0.05630600 | 0.05528500 | 0.05428500 | 0.05342100 |
| 0.06852300 | 0.06760100 | 0.06677000 | 0.06594400 | 0.06506200 | 0.06421100 | 0.06355900 | 0.06319300 | 0.06291300 | 0.06237000 | 0.06151100 | 0.06051300 | 0.05939400 | 0.05827600 |
| 0.07665000 | 0.07579400 | 0.07490200 | 0.07407300 | 0.07342000 | 0.07286200 | 0.07224500 | 0.07147700 | 0.07059000 | 0.06970800 | 0.06884500 | 0.06793900 | 0.06704400 | 0.06630000 |
| 0.06489400 | 0.06406900 | 0.06298400 | 0.06174400 | 0.06072100 | 0.05998600 | 0.05931700 | 0.05872000 | 0.05825300 | 0.05762300 | 0.05658900 | 0.05539000 | 0.05431400 | 0.05340000 |
| 0.06179000 | 0.06088000 | 0.05987000 | 0.05882200 | 0.05785000 | 0.05703300 | 0.05636000 | 0.05583800 | 0.05539300 | 0.05485000 | 0.05412300 | 0.05327200 | 0.05240800 | 0.05162400 |
| 0.03982300 | 0.03955400 | 0.03910300 | 0.03842800 | 0.03771500 | 0.03726600 | 0.03716700 | 0.03710400 | 0.03670400 | 0.03600300 | 0.03533600 | 0.03485100 | 0.03437900 | 0.03374800 |
| 0.04334200 | 0.04307500 | 0.04247800 | 0.04167300 | 0.04114200 | 0.04103100 | 0.04094100 | 0.04052900 | 0.03985200 | 0.03910500 | 0.03848700 | 0.03811500 | 0.03780500 | 0.03734100 |
| 0.05188900 | 0.05167800 | 0.05116700 | 0.05031900 | 0.04940500 | 0.04861300 | 0.04804900 | 0.04771800 | 0.04735800 | 0.04676600 | 0.04612400 | 0.04560800 | 0.04498600 | 0.04410100 |

| 8884       | 8886       | 8888       | 8890       | 8892       | 8894       | 8895       | 8897       | 8899       | 8901       | 8903       | 8905       | 8907       | 8909       |
|------------|------------|------------|------------|------------|------------|------------|------------|------------|------------|------------|------------|------------|------------|
| 0.05399900 | 0.05342500 | 0.05295700 | 0.05234200 | 0.05158600 | 0.05084400 | 0.05021000 | 0.04963000 | 0.04898000 | 0.04829100 | 0.04779500 | 0.04755000 | 0.04718300 | 0.04642600 |
| 0.04715100 | 0.04636800 | 0.04557900 | 0.04489700 | 0.04427300 | 0.04357100 | 0.04272900 | 0.04186100 | 0.04118300 | 0.04075000 | 0.04035500 | 0.03986900 | 0.03940500 | 0.03899800 |
| 0.06649100 | 0.06624700 | 0.06621400 | 0.06584800 | 0.06498000 | 0.06387200 | 0.06287100 | 0.06221400 | 0.06187900 | 0.06157300 | 0.06106500 | 0.06037300 | 0.05958100 | 0.05872400 |
| 0.06200700 | 0.06152400 | 0.06134700 | 0.06093900 | 0.06021100 | 0.05934600 | 0.05848700 | 0.05785000 | 0.05758100 | 0.05742300 | 0.05700500 | 0.05629300 | 0.05549200 | 0.05480500 |
| 0.04328500 | 0.04319000 | 0.04331500 | 0.04335900 | 0.04313100 | 0.04256700 | 0.04183100 | 0.04129200 | 0.04100800 | 0.04056600 | 0.03978000 | 0.03907800 | 0.03888800 | 0.03898000 |
| 0.06065900 | 0.06055600 | 0.06057000 | 0.06021900 | 0.05959400 | 0.05882000 | 0.05784600 | 0.05691200 | 0.05625600 | 0.05562000 | 0.05476500 | 0.05386700 | 0.05312800 | 0.05260600 |
| 0.06372700 | 0.06368000 | 0.06369700 | 0.06321000 | 0.06235800 | 0.06152800 | 0.06083400 | 0.06024200 | 0.05959600 | 0.05876100 | 0.05791400 | 0.05730000 | 0.05684800 | 0.05636200 |
| 0.05067000 | 0.05046800 | 0.05009500 | 0.04945600 | 0.04884600 | 0.04819300 | 0.04727800 | 0.04650200 | 0.04619500 | 0.04591600 | 0.04533400 | 0.04474100 | 0.04434000 | 0.04394400 |
| 0.05285200 | 0.05259800 | 0.05239700 | 0.05201600 | 0.05141500 | 0.05056300 | 0.04957300 | 0.04878600 | 0.04835400 | 0.04805000 | 0.04760200 | 0.04692900 | 0.04615400 | 0.04550500 |
| 0.05767300 | 0.05782000 | 0.05812900 | 0.05785600 | 0.05688900 | 0.05561100 | 0.05445000 | 0.05372100 | 0.05337800 | 0.05298400 | 0.05232500 | 0.05164000 | 0.05101600 | 0.05034700 |
| 0.06586100 | 0.06567400 | 0.06534800 | 0.06461300 | 0.06360300 | 0.06251000 | 0.06155200 | 0.06105500 | 0.06093300 | 0.06059400 | 0.05974900 | 0.05870800 | 0.05790800 | 0.05750200 |
| 0.05279000 | 0.05262200 | 0.05256600 | 0.05217700 | 0.05145400 | 0.05064300 | 0.04990300 | 0.04935600 | 0.04896700 | 0.04848000 | 0.04784700 | 0.04724600 | 0.04659500 | 0.04570000 |
| 0.05102100 | 0.05063500 | 0.05027900 | 0.04973100 | 0.04900900 | 0.04823800 | 0.04750600 | 0.04694900 | 0.04656700 | 0.04607600 | 0.04534600 | 0.04459300 | 0.04396600 | 0.04343900 |
| 0.03314100 | 0.03287800 | 0.03290200 | 0.03290600 | 0.03275000 | 0.03244100 | 0.03207800 | 0.03191200 | 0.03201800 | 0.03201400 | 0.03156700 | 0.03091300 | 0.03040500 | 0.03000300 |
| 0.03690000 | 0.03669200 | 0.03651700 | 0.03612200 | 0.03556800 | 0.03500000 | 0.03450100 | 0.03429600 | 0.03448100 | 0.03454000 | 0.03396500 | 0.03303000 | 0.03225000 | 0.03175300 |
| 0.04334600 | 0.04300100 | 0.04276900 | 0.04245000 | 0.04215900 | 0.04184200 | 0.04140900 | 0.04104800 | 0.04086800 | 0.04056600 | 0.03994900 | 0.03928500 | 0.03872600 | 0.03809700 |

| 8911       | 8913       | 8915       | 8917       | 8919       | 8921       | 8922       | 8924       | 8926       | 8928       | 8930       | 8932       | 8934       | 8936       |
|------------|------------|------------|------------|------------|------------|------------|------------|------------|------------|------------|------------|------------|------------|
| 0.04557100 | 0.04492100 | 0.04434700 | 0.04370500 | 0.04305700 | 0.04241300 | 0.04170200 | 0.04095400 | 0.04027600 | 0.03975500 | 0.03939800 | 0.03908200 | 0.03864600 | 0.03807500 |
| 0.03847200 | 0.03772100 | 0.03686500 | 0.03603900 | 0.03523600 | 0.03447000 | 0.03384600 | 0.03337300 | 0.03290600 | 0.03230000 | 0.03157000 | 0.03093400 | 0.03053100 | 0.03021600 |
| 0.05796200 | 0.05741000 | 0.05681900 | 0.05595300 | 0.05501600 | 0.05429400 | 0.05380200 | 0.05337100 | 0.05279300 | 0.05201200 | 0.05123400 | 0.05068900 | 0.05040300 | 0.05018000 |
| 0.05428400 | 0.05374400 | 0.05306700 | 0.05247600 | 0.05209600 | 0.05162000 | 0.05082900 | 0.04994500 | 0.04923200 | 0.04866800 | 0.04820600 | 0.04789600 | 0.04761700 | 0.04715800 |
| 0.03886600 | 0.03852800 | 0.03818500 | 0.03780600 | 0.03728400 | 0.03668400 | 0.03610300 | 0.03555600 | 0.03505700 | 0.03468500 | 0.03452900 | 0.03455900 | 0.03454500 | 0.03430800 |
| 0.05236300 | 0.05228100 | 0.05197600 | 0.05125700 | 0.05038000 | 0.04962000 | 0.04895200 | 0.04828900 | 0.04764400 | 0.04703000 | 0.04648800 | 0.04605800 | 0.04566300 | 0.04526600 |
| 0.05584700 | 0.05524900 | 0.05439200 | 0.05343400 | 0.05272200 | 0.05223800 | 0.05175700 | 0.05118200 | 0.05046600 | 0.04964400 | 0.04893400 | 0.04853700 | 0.04830100 | 0.04784500 |
| 0.04341300 | 0.04280900 | 0.04224800 | 0.04181000 | 0.04139700 | 0.04079500 | 0.04004400 | 0.03944200 | 0.03910300 | 0.03883700 | 0.03851300 | 0.03818900 | 0.03781700 | 0.03724300 |
| 0.04508900 | 0.04475100 | 0.04418300 | 0.04323500 | 0.04212700 | 0.04120400 | 0.04058500 | 0.04015500 | 0.03966600 | 0.03886300 | 0.03779300 | 0.03691200 | 0.03650700 | 0.03630300 |
| 0.04982400 | 0.04960100 | 0.04942300 | 0.04908500 | 0.04864300 | 0.04816400 | 0.04766900 | 0.04715800 | 0.04660200 | 0.04594000 | 0.04515300 | 0.04443900 | 0.04398400 | 0.04367000 |
| 0.05724800 | 0.05674500 | 0.05594300 | 0.05518500 | 0.05467400 | 0.05425200 | 0.05374700 | 0.05311600 | 0.05236300 | 0.05158800 | 0.05100100 | 0.05078200 | 0.05079300 | 0.05057300 |
| 0.04473400 | 0.04397100 | 0.04329800 | 0.04256200 | 0.04195400 | 0.04155400 | 0.04112200 | 0.04056100 | 0.03999000 | 0.03947000 | 0.03900200 | 0.03857000 | 0.03816000 | 0.03773800 |
| 0.04302700 | 0.04267700 | 0.04223400 | 0.04176400 | 0.04138600 | 0.04086600 | 0.04001900 | 0.03910800 | 0.03837800 | 0.03778900 | 0.03736600 | 0.03715900 | 0.03693500 | 0.03647500 |
| 0.02968100 | 0.02956700 | 0.02944900 | 0.02902400 | 0.02854000 | 0.02835500 | 0.02833200 | 0.02818000 | 0.02777100 | 0.02714600 | 0.02659100 | 0.02635600 | 0.02628200 | 0.02608800 |
| 0.03158000 | 0.03165800 | 0.03159600 | 0.03115200 | 0.03051800 | 0.02998800 | 0.02970900 | 0.02964100 | 0.02958100 | 0.02931800 | 0.02885900 | 0.02839200 | 0.02800400 | 0.02768500 |
| 0.03739200 | 0.03682700 | 0.03656700 | 0.03655800 | 0.03648600 | 0.03620400 | 0.03588900 | 0.03551300 | 0.03483700 | 0.03390200 | 0.03304800 | 0.03260700 | 0.03252500 | 0.03240600 |

| 8938       | 8940       | 8942       | 8944       | 8946       | 8948       | 8949       | 8951       | 8953       | 8955       | 8957       | 8959       | 8961       | 8963       |
|------------|------------|------------|------------|------------|------------|------------|------------|------------|------------|------------|------------|------------|------------|
| 0.03751100 | 0.03708800 | 0.03682500 | 0.03660200 | 0.03624900 | 0.03570200 | 0.03504900 | 0.03441600 | 0.03395400 | 0.03372900 | 0.03357600 | 0.03326300 | 0.03277400 | 0.03229100 |
| 0.02983300 | 0.02943400 | 0.02910100 | 0.02872700 | 0.02816300 | 0.02743400 | 0.02666600 | 0.02598900 | 0.02555800 | 0.02541300 | 0.02529600 | 0.02487800 | 0.02428000 | 0.02405200 |
| 0.04986200 | 0.04955400 | 0.04929500 | 0.04884500 | 0.04810800 | 0.04725900 | 0.04650200 | 0.04605700 | 0.04599100 | 0.04600700 | 0.04573900 | 0.04516300 | 0.04454800 | 0.04411200 |
| 0.04655900 | 0.04610100 | 0.04593300 | 0.04578400 | 0.04529000 | 0.04448800 | 0.04365200 | 0.04300300 | 0.04271600 | 0.04277700 | 0.04282000 | 0.04252300 | 0.04200700 | 0.04161500 |
| 0.03396500 | 0.03370600 | 0.03352700 | 0.03337500 | 0.03313800 | 0.03260300 | 0.03176900 | 0.03099700 | 0.03066900 | 0.03089900 | 0.03138400 | 0.03151200 | 0.03106500 | 0.03052200 |
| 0.04499500 | 0.04488700 | 0.04471100 | 0.04422900 | 0.04350500 | 0.04278800 | 0.04219600 | 0.04170000 | 0.04134200 | 0.04121300 | 0.04123200 | 0.04107800 | 0.04051700 | 0.03980100 |
| 0.04715600 | 0.04671000 | 0.04675400 | 0.04685300 | 0.04652600 | 0.04592600 | 0.04540100 | 0.04490300 | 0.04435100 | 0.04391000 | 0.04357700 | 0.04313000 | 0.04257400 | 0.04213100 |
| 0.03660500 | 0.03626300 | 0.03623100 | 0.03610300 | 0.03556200 | 0.03475100 | 0.03407200 | 0.03367800 | 0.03345000 | 0.03331800 | 0.03317900 | 0.03287300 | 0.03240500 | 0.03189300 |
| 0.03609900 | 0.03613700 | 0.03635500 | 0.03620300 | 0.03549300 | 0.03461100 | 0.03383400 | 0.03309600 | 0.03238700 | 0.03192300 | 0.03179400 | 0.03175900 | 0.03163500 | 0.03148300 |
| 0.04337400 | 0.04320600 | 0.04317300 | 0.04300500 | 0.04247500 | 0.04161600 | 0.04068000 | 0.04006800 | 0.03999300 | 0.04020800 | 0.04030800 | 0.04006400 | 0.03950400 | 0.03892900 |
| 0.04993200 | 0.04925600 | 0.04894600 | 0.04889800 | 0.04870500 | 0.04815000 | 0.04739600 | 0.04673500 | 0.04628800 | 0.04604100 | 0.04595700 | 0.04586700 | 0.04554500 | 0.04505000 |
| 0.03721400 | 0.03664100 | 0.03622200 | 0.03591500 | 0.03547700 | 0.03488400 | 0.03425500 | 0.03371200 | 0.03352400 | 0.03373800 | 0.03379200 | 0.03329000 | 0.03260100 | 0.03215200 |
| 0.03598400 | 0.03577200 | 0.03577800 | 0.03564700 | 0.03514100 | 0.03435900 | 0.03354300 | 0.03285600 | 0.03239200 | 0.03214100 | 0.03201300 | 0.03192400 | 0.03178000 | 0.03153100 |
| 0.02582800 | 0.02574300 | 0.02585000 | 0.02586400 | 0.02553300 | 0.02492900 | 0.02431500 | 0.02392900 | 0.02391800 | 0.02419700 | 0.02445400 | 0.02442200 | 0.02409100 | 0.02369800 |
| 0.02751700 | 0.02756200 | 0.02770400 | 0.02765100 | 0.02716800 | 0.02645700 | 0.02603500 | 0.02605200 | 0.02619700 | 0.02626400 | 0.02623900 | 0.02596800 | 0.02536700 | 0.02475800 |
| 0.03216300 | 0.03210400 | 0.03226000 | 0.03220000 | 0.03162400 | 0.03074000 | 0.02991200 | 0.02934300 | 0.02919400 | 0.02945600 | 0.02971700 | 0.02955800 | 0.02908900 | 0.02870400 |



| 8965       | 8967       | 8969       | 8971       | 8973       | 8975       | 8976       | 8978       | 8980       | 8982       | 8984       | 8986       | 8988       | 8990       |
|------------|------------|------------|------------|------------|------------|------------|------------|------------|------------|------------|------------|------------|------------|
| 0.03197100 | 0.03185600 | 0.03185300 | 0.03173600 | 0.03138400 | 0.03095100 | 0.03054200 | 0.03005300 | 0.02952700 | 0.02918300 | 0.02905900 | 0.02905300 | 0.02910000 | 0.02911100 |
| 0.02438700 | 0.02474900 | 0.02453600 | 0.02380600 | 0.02305800 | 0.02253200 | 0.02207900 | 0.02164000 | 0.02142200 | 0.02143800 | 0.02132800 | 0.02092800 | 0.02051900 | 0.02032000 |
| 0.04378200 | 0.04336800 | 0.04293300 | 0.04270000 | 0.04267400 | 0.04262500 | 0.04235700 | 0.04186700 | 0.04132500 | 0.04085100 | 0.04041100 | 0.04011400 | 0.04010100 | 0.04012900 |
| 0.04151000 | 0.04160700 | 0.04161500 | 0.04131800 | 0.04092000 | 0.04069000 | 0.04047500 | 0.04002500 | 0.03945700 | 0.03904900 | 0.03883800 | 0.03868600 | 0.03856600 | 0.03850000 |
| 0.03038600 | 0.03058400 | 0.03070500 | 0.03059100 | 0.03044700 | 0.03038700 | 0.03021600 | 0.02973700 | 0.02905800 | 0.02851200 | 0.02829600 | 0.02831600 | 0.02840100 | 0.02849900 |
| 0.03940600 | 0.03939200 | 0.03941500 | 0.03927200 | 0.03899600 | 0.03859800 | 0.03802400 | 0.03738500 | 0.03695800 | 0.03683200 | 0.03681200 | 0.03678400 | 0.03673300 | 0.03648300 |
| 0.04189000 | 0.04180000 | 0.04172900 | 0.04148200 | 0.04107800 | 0.04079500 | 0.04060200 | 0.04019100 | 0.03967700 | 0.03937800 | 0.03921900 | 0.03910500 | 0.03911200 | 0.03906400 |
| 0.03147900 | 0.03125200 | 0.03114500 | 0.03104600 | 0.03085900 | 0.03048400 | 0.03002000 | 0.02979300 | 0.02987500 | 0.02990300 | 0.02966600 | 0.02942800 | 0.02939500 | 0.02937000 |
| 0.03124900 | 0.03078800 | 0.03018800 | 0.02972300 | 0.02955500 | 0.02952500 | 0.02930400 | 0.02879000 | 0.02816200 | 0.02765300 | 0.02736800 | 0.02726400 | 0.02723500 | 0.02715000 |
| 0.03862200 | 0.03852300 | 0.03841300 | 0.03824000 | 0.03805800 | 0.03778200 | 0.03732800 | 0.03685000 | 0.03654300 | 0.03640300 | 0.03635000 | 0.03638300 | 0.03647000 | 0.03642800 |
| 0.04465000 | 0.04436400 | 0.04402900 | 0.04371200 | 0.04356400 | 0.04344600 | 0.04315100 | 0.04276100 | 0.04251600 | 0.04250900 | 0.04261000 | 0.04260400 | 0.04236000 | 0.04188800 |
| 0.03191000 | 0.03172900 | 0.03150800 | 0.03110400 | 0.03060500 | 0.03033400 | 0.03024400 | 0.02994600 | 0.02949100 | 0.02933000 | 0.02951400 | 0.02971500 | 0.02975100 | 0.02954000 |
| 0.03117700 | 0.03075800 | 0.03039000 | 0.03010800 | 0.02986500 | 0.02970200 | 0.02962400 | 0.02951000 | 0.02927500 | 0.02897800 | 0.02873400 | 0.02858400 | 0.02850400 | 0.02845600 |
| 0.02347100 | 0.02339500 | 0.02328500 | 0.02303900 | 0.02280600 | 0.02276200 | 0.02274100 | 0.02244600 | 0.02191300 | 0.02148400 | 0.02144500 | 0.02180200 | 0.02227600 | 0.02245400 |
| 0.02448800 | 0.02446700 | 0.02444500 | 0.02438300 | 0.02434100 | 0.02427500 | 0.02404200 | 0.02359100 | 0.02315100 | 0.02297600 | 0.02291300 | 0.02269700 | 0.02242500 | 0.02229300 |
| 0.02853400 | 0.02840700 | 0.02821300 | 0.02807200 | 0.02804000 | 0.02788700 | 0.02738600 | 0.02667000 | 0.02614700 | 0.02607500 | 0.02630700 | 0.02650800 | 0.02653900 | 0.02649300 |

| 8992       | 8994       | 8996       | 8998       | 9000       | 9002       | 9003       | 9005       | 9007       | 9009       | 9011       | 9013       | 9015       | 9017       |
|------------|------------|------------|------------|------------|------------|------------|------------|------------|------------|------------|------------|------------|------------|
| 0.02907400 | 0.02910300 | 0.02913800 | 0.02894300 | 0.02852000 | 0.02807800 | 0.02769000 | 0.02740500 | 0.02735000 | 0.02741700 | 0.02732800 | 0.02708000 | 0.02692400 | 0.02697200 |
| 0.02023200 | 0.02014900 | 0.02008200 | 0.01998100 | 0.01971200 | 0.01928900 | 0.01897100 | 0.01890700 | 0.01887800 | 0.01865500 | 0.01827200 | 0.01790300 | 0.01775000 | 0.01786000 |
| 0.03990600 | 0.03954100 | 0.03928300 | 0.03922100 | 0.03920400 | 0.03893000 | 0.03835300 | 0.03790300 | 0.03795100 | 0.03824600 | 0.03828100 | 0.03791300 | 0.03742400 | 0.03722000 |
| 0.03846600 | 0.03849300 | 0.03858400 | 0.03861200 | 0.03838600 | 0.03779700 | 0.03704300 | 0.03654900 | 0.03647700 | 0.03667900 | 0.03693600 | 0.03691000 | 0.03639800 | 0.03573800 |
| 0.02862100 | 0.02873800 | 0.02879900 | 0.02871000 | 0.02843300 | 0.02811500 | 0.02788400 | 0.02770900 | 0.02761200 | 0.02767700 | 0.02779100 | 0.02770600 | 0.02743200 | 0.02724100 |
| 0.03601100 | 0.03572000 | 0.03591600 | 0.03632700 | 0.03644000 | 0.03606800 | 0.03550400 | 0.03516800 | 0.03515600 | 0.03515200 | 0.03484300 | 0.03433600 | 0.03395500 | 0.03382400 |
| 0.03876400 | 0.03849000 | 0.03854700 | 0.03874400 | 0.03877400 | 0.03865800 | 0.03847200 | 0.03819600 | 0.03795100 | 0.03780900 | 0.03751000 | 0.03694000 | 0.03646400 | 0.03638100 |
| 0.02914400 | 0.02883000 | 0.02869600 | 0.02875500 | 0.02871300 | 0.02841100 | 0.02802000 | 0.02771600 | 0.02748700 | 0.02725900 | 0.02693700 | 0.02649800 | 0.02612300 | 0.02600600 |
| 0.02689300 | 0.02654800 | 0.02630400 | 0.02614200 | 0.02594300 | 0.02572500 | 0.02555700 | 0.02549700 | 0.02556900 | 0.02559600 | 0.02524600 | 0.02448000 | 0.02382700 | 0.02380300 |
| 0.03612100 | 0.03572200 | 0.03550600 | 0.03548300 | 0.03548500 | 0.03533400 | 0.03492200 | 0.03450600 | 0.03452200 | 0.03489200 | 0.03504900 | 0.03466100 | 0.03403800 | 0.03372900 |
| 0.04132900 | 0.04094000 | 0.04089300 | 0.04105600 | 0.04113600 | 0.04099000 | 0.04069400 | 0.04044300 | 0.04034100 | 0.04024000 | 0.03993700 | 0.03950400 | 0.03923100 | 0.03930700 |
| 0.02902200 | 0.02838200 | 0.02791400 | 0.02769800 | 0.02761800 | 0.02754500 | 0.02740000 | 0.02715700 | 0.02683900 | 0.02656300 | 0.02646600 | 0.02646400 | 0.02636000 | 0.02618900 |
| 0.02841600 | 0.02840100 | 0.02838100 | 0.02824300 | 0.02783700 | 0.02717700 | 0.02657900 | 0.02629700 | 0.02622700 | 0.02622100 | 0.02626600 | 0.02629200 | 0.02613200 | 0.02573400 |
| 0.02219300 | 0.02188000 | 0.02188100 | 0.02198700 | 0.02189100 | 0.02165600 | 0.02141300 | 0.02117000 | 0.02093400 | 0.02074800 | 0.02066400 | 0.02064800 | 0.02058300 | 0.02050000 |
| 0.02229700 | 0.02244800 | 0.02273000 | 0.02292400 | 0.02286600 | 0.02264000 | 0.02234200 | 0.02203200 | 0.02182700 | 0.02177500 | 0.02175900 | 0.02168600 | 0.02163500 | 0.02173800 |
| 0.02638100 | 0.02608200 | 0.02567900 | 0.02541800 | 0.02533900 | 0.02527900 | 0.02512400 | 0.02490300 | 0.02470700 | 0.02455600 | 0.02439100 | 0.02418400 | 0.02400300 | 0.02389900 |

| 9019       | 9021       | 9023       | 9025       | 9027       | 9028       | 9030       | 9032       | 9034       | 9036       | 9038       | 9040       | 9042       | 9044       |
|------------|------------|------------|------------|------------|------------|------------|------------|------------|------------|------------|------------|------------|------------|
| 0.02702200 | 0.02678500 | 0.02631000 | 0.02593700 | 0.02578000 | 0.02570200 | 0.02566600 | 0.02572200 | 0.02587000 | 0.02598600 | 0.02586100 | 0.02548400 | 0.02511900 | 0.02500000 |
| 0.01797800 | 0.01783200 | 0.01745700 | 0.01704000 | 0.01672100 | 0.01664000 | 0.01686100 | 0.01722800 | 0.01742100 | 0.01715600 | 0.01653300 | 0.01603400 | 0.01591100 | 0.01596400 |
| 0.03738700 | 0.03749600 | 0.03716900 | 0.03663900 | 0.03634600 | 0.03634000 | 0.03644400 | 0.03657900 | 0.03664300 | 0.03638700 | 0.03576600 | 0.03521100 | 0.03504700 | 0.03503100 |
| 0.03548300 | 0.03577300 | 0.03626000 | 0.03653000 | 0.03646100 | 0.03622300 | 0.03603100 | 0.03584100 | 0.03543800 | 0.03482500 | 0.03432300 | 0.03422100 | 0.03448300 | 0.03483700 |
| 0.02719800 | 0.02711100 | 0.02692600 | 0.02675300 | 0.02670800 | 0.02685000 | 0.02706300 | 0.02714000 | 0.02694300 | 0.02645100 | 0.02593000 | 0.02575400 | 0.02597500 | 0.02637500 |
| 0.03386400 | 0.03391800 | 0.03382300 | 0.03362400 | 0.03350900 | 0.03344900 | 0.03329900 | 0.03311300 | 0.03299300 | 0.03287700 | 0.03274600 | 0.03273600 | 0.03288100 | 0.03301900 |
| 0.03650000 | 0.03652100 | 0.03641300 | 0.03625900 | 0.03611900 | 0.03601200 | 0.03589300 | 0.03577900 | 0.03571800 | 0.03554900 | 0.03519300 | 0.03489200 | 0.03480500 | 0.03486200 |
| 0.02611100 | 0.02626100 | 0.02638200 | 0.02646100 | 0.02642900 | 0.02633700 | 0.02633900 | 0.02634700 | 0.02611900 | 0.02568600 | 0.02535200 | 0.02528100 | 0.02537400 | 0.02545600 |
| 0.02417900 | 0.02436000 | 0.02423900 | 0.02401900 | 0.02367900 | 0.02326500 | 0.02304600 | 0.02305200 | 0.02308300 | 0.02309200 | 0.02306500 | 0.02285700 | 0.02250500 | 0.02228300 |
| 0.03378100 | 0.03377700 | 0.03352500 | 0.03315100 | 0.03278300 | 0.03261000 | 0.03277400 | 0.03302000 | 0.03297900 | 0.03264300 | 0.03231200 | 0.03227600 | 0.03255200 | 0.03292200 |
| 0.03962000 | 0.03983200 | 0.03964300 | 0.03906700 | 0.03846300 | 0.03822900 | 0.03839700 | 0.03864900 | 0.03875600 | 0.03872300 | 0.03858700 | 0.03839900 | 0.03825000 | 0.03818300 |
| 0.02612500 | 0.02615100 | 0.02609500 | 0.02585100 | 0.02551200 | 0.02527000 | 0.02514600 | 0.02509000 | 0.02515100 | 0.02526700 | 0.02530300 | 0.02519500 | 0.02493100 | 0.02465800 |
| 0.02529600 | 0.02505700 | 0.02504300 | 0.02514700 | 0.02526800 | 0.02533900 | 0.02537800 | 0.02544200 | 0.02543600 | 0.02520200 | 0.02480900 | 0.02446800 | 0.02428800 | 0.02425300 |
| 0.02055600 | 0.02071600 | 0.02075000 | 0.02052900 | 0.02020100 | 0.02000900 | 0.01993200 | 0.01980800 | 0.01970600 | 0.01969300 | 0.01960300 | 0.01941700 | 0.01930400 | 0.01928600 |
| 0.02194400 | 0.02198100 | 0.02171000 | 0.02131500 | 0.02100100 | 0.02083800 | 0.02085200 | 0.02097100 | 0.02100500 | 0.02085200 | 0.02063100 | 0.02049300 | 0.02044100 | 0.02044800 |
| 0.02380000 | 0.02370000 | 0.02371700 | 0.02375700 | 0.02358500 | 0.02331400 | 0.02324400 | 0.02335800 | 0.02345000 | 0.02336700 | 0.02301100 | 0.02254800 | 0.02237700 | 0.02260900 |

| 9046       | 9048       | 9050       | 9052       | 9054       | 9055       | 9057       | 9059       | 9061       | 9063       | 9065       | 9067       | 9069       | 9071       |
|------------|------------|------------|------------|------------|------------|------------|------------|------------|------------|------------|------------|------------|------------|
| 0.02515600 | 0.02541200 | 0.02555700 | 0.02558200 | 0.02556000 | 0.02536000 | 0.02486400 | 0.02433800 | 0.02423600 | 0.02466100 | 0.02522800 | 0.02551700 | 0.02543900 | 0.02507400 |
| 0.01597900 | 0.01597000 | 0.01604400 | 0.01624600 | 0.01647200 | 0.01649900 | 0.01619100 | 0.01574400 | 0.01552900 | 0.01561100 | 0.01572800 | 0.01571500 | 0.01564100 | 0.01555900 |
| 0.03492200 | 0.03487000 | 0.03498400 | 0.03517000 | 0.03539000 | 0.03556700 | 0.03554300 | 0.03545000 | 0.03552700 | 0.03558300 | 0.03535900 | 0.03509400 | 0.03509000 | 0.03517200 |
| 0.03506000 | 0.03516300 | 0.03536000 | 0.03570400 | 0.03582300 | 0.03540300 | 0.03478300 | 0.03456500 | 0.03472800 | 0.03471700 | 0.03436900 | 0.03411000 | 0.03424800 | 0.03455600 |
| 0.02674400 | 0.02698000 | 0.02705300 | 0.02691300 | 0.02665500 | 0.02649300 | 0.02639000 | 0.02622900 | 0.02610700 | 0.02600100 | 0.02580300 | 0.02567300 | 0.02579700 | 0.02610300 |
| 0.03296100 | 0.03266800 | 0.03239200 | 0.03239800 | 0.03256000 | 0.03265100 | 0.03268700 | 0.03273400 | 0.03274800 | 0.03270000 | 0.03254700 | 0.03224300 | 0.03197500 | 0.03197400 |
| 0.03502900 | 0.03524000 | 0.03538200 | 0.03548300 | 0.03552300 | 0.03531400 | 0.03484300 | 0.03441700 | 0.03428500 | 0.03436300 | 0.03444600 | 0.03452000 | 0.03461000 | 0.03461100 |
| 0.02536900 | 0.02513400 | 0.02502300 | 0.02516200 | 0.02534700 | 0.02535400 | 0.02520000 | 0.02513900 | 0.02534200 | 0.02560300 | 0.02566500 | 0.02557400 | 0.02547700 | 0.02536200 |
| 0.02236000 | 0.02267700 | 0.02297300 | 0.02293800 | 0.02260500 | 0.02232000 | 0.02223400 | 0.02223700 | 0.02221900 | 0.02212300 | 0.02197800 | 0.02194200 | 0.02208900 | 0.02220300 |
| 0.03318600 | 0.03326300 | 0.03321000 | 0.03314200 | 0.03305400 | 0.03288100 | 0.03266700 | 0.03247400 | 0.03235200 | 0.03245400 | 0.03279300 | 0.03307000 | 0.03305800 | 0.03284000 |
| 0.03815100 | 0.03815200 | 0.03829200 | 0.03852400 | 0.03857400 | 0.03836600 | 0.03810400 | 0.03791400 | 0.03779900 | 0.03778800 | 0.03782500 | 0.03779700 | 0.03778300 | 0.03785800 |
| 0.02457000 | 0.02462200 | 0.02470300 | 0.02484200 | 0.02495700 | 0.02482400 | 0.02448600 | 0.02425900 | 0.02427100 | 0.02438400 | 0.02448500 | 0.02454600 | 0.02457500 | 0.02463600 |
| 0.02427300 | 0.02431300 | 0.02442000 | 0.02454000 | 0.02446600 | 0.02410100 | 0.02372900 | 0.02369700 | 0.02389700 | 0.02398700 | 0.02393200 | 0.02397800 | 0.02414900 | 0.02413400 |
| 0.01930100 | 0.01934100 | 0.01942500 | 0.01961300 | 0.01987500 | 0.02003000 | 0.01994400 | 0.01966200 | 0.01938500 | 0.01927100 | 0.01930400 | 0.01950000 | 0.01987700 | 0.02016100 |
| 0.02049500 | 0.02053100 | 0.02059900 | 0.02071600 | 0.02076500 | 0.02065700 | 0.02040800 | 0.02017700 | 0.02020900 | 0.02044500 | 0.02057800 | 0.02062000 | 0.02076200 | 0.02083900 |
| 0.02297700 | 0.02328900 | 0.02351600 | 0.02354700 | 0.02335000 | 0.02310500 | 0.02289500 | 0.02264600 | 0.02240200 | 0.02235300 | 0.02255300 | 0.02280100 | 0.02290400 | 0.02287900 |

| 9073       | 9075       | 9077       | 9079       | 9081       | 9082       | 9084       | 9086       | 9088       | 9090       | 9092       | 9094       | 9096       | 9098       |
|------------|------------|------------|------------|------------|------------|------------|------------|------------|------------|------------|------------|------------|------------|
| 0.02459100 | 0.02433100 | 0.02439700 | 0.02446600 | 0.02434600 | 0.02410100 | 0.02381300 | 0.02363400 | 0.02356800 | 0.02338700 | 0.02313800 | 0.02317000 | 0.02357700 | 0.02409100 |
| 0.01544800 | 0.01532700 | 0.01516000 | 0.01488100 | 0.01466800 | 0.01478300 | 0.01514200 | 0.01534700 | 0.01512900 | 0.01459200 | 0.01404200 | 0.01378000 | 0.01391200 | 0.01426900 |
| 0.03502600 | 0.03465800 | 0.03431400 | 0.03418600 | 0.03423000 | 0.03426300 | 0.03422700 | 0.03414000 | 0.03396600 | 0.03375900 | 0.03362200 | 0.03351300 | 0.03339400 | 0.03340200 |
| 0.03468400 | 0.03462100 | 0.03451500 | 0.03438700 | 0.03415800 | 0.03384200 | 0.03367300 | 0.03372100 | 0.03361800 | 0.03322900 | 0.03288000 | 0.03272000 | 0.03270500 | 0.03290900 |
| 0.02634700 | 0.02629900 | 0.02599200 | 0.02575500 | 0.02579700 | 0.02595300 | 0.02596600 | 0.02577800 | 0.02550600 | 0.02529600 | 0.02525600 | 0.02544500 | 0.02572000 | 0.02579200 |
| 0.03204600 | 0.03186400 | 0.03158200 | 0.03161100 | 0.03185800 | 0.03181000 | 0.03145100 | 0.03122900 | 0.03118000 | 0.03105500 | 0.03089800 | 0.03085600 | 0.03086400 | 0.03083700 |
| 0.03450000 | 0.03438000 | 0.03429600 | 0.03428300 | 0.03432600 | 0.03425100 | 0.03397600 | 0.03369700 | 0.03360000 | 0.03361200 | 0.03359200 | 0.03355500 | 0.03361800 | 0.03386400 |
| 0.02514300 | 0.02482900 | 0.02454100 | 0.02438800 | 0.02434400 | 0.02428800 | 0.02423200 | 0.02424800 | 0.02419700 | 0.02389600 | 0.02349800 | 0.02332200 | 0.02342300 | 0.02358700 |
| 0.02202100 | 0.02163200 | 0.02138100 | 0.02144000 | 0.02165000 | 0.02172600 | 0.02153200 | 0.02113000 | 0.02068900 | 0.02041300 | 0.02044300 | 0.02065500 | 0.02071100 | 0.02051500 |
| 0.03258100 | 0.03236800 | 0.03225000 | 0.03219300 | 0.03207900 | 0.03188900 | 0.03167300 | 0.03136900 | 0.03097900 | 0.03076800 | 0.03091900 | 0.03122700 | 0.03142600 | 0.03150900 |
| 0.03780500 | 0.03751100 | 0.03721300 | 0.03717300 | 0.03737500 | 0.03752600 | 0.03741000 | 0.03711800 | 0.03673100 | 0.03633600 | 0.03623900 | 0.03652200 | 0.03688100 | 0.03711700 |
| 0.02469200 | 0.02460700 | 0.02444200 | 0.02440100 | 0.02449600 | 0.02454800 | 0.02440800 | 0.02411300 | 0.02380800 | 0.02354800 | 0.02336900 | 0.02339400 | 0.02355700 | 0.02359600 |
| 0.02383600 | 0.02353100 | 0.02332500 | 0.02315500 | 0.02310900 | 0.02317600 | 0.02315300 | 0.02294000 | 0.02259300 | 0.02236900 | 0.02263300 | 0.02333100 | 0.02394100 | 0.02411500 |
| 0.02004300 | 0.01962700 | 0.01926200 | 0.01912200 | 0.01914500 | 0.01921700 | 0.01929500 | 0.01929400 | 0.01903600 | 0.01863600 | 0.01848200 | 0.01858400 | 0.01864700 | 0.01868300 |
| 0.02060300 | 0.02024400 | 0.02007200 | 0.02004500 | 0.01996800 | 0.01984200 | 0.01982700 | 0.01991300 | 0.01990000 | 0.01979400 | 0.01974100 | 0.01970000 | 0.01967500 | 0.01983700 |
| 0.02279600 | 0.02266100 | 0.02249000 | 0.02235400 | 0.02228600 | 0.02222400 | 0.02206700 | 0.02172100 | 0.02123400 | 0.02081300 | 0.02063000 | 0.02076300 | 0.02119900 | 0.02171300 |

| 9100       | 9102       | 9104       | 9106       | 9108       | 9109       | 9111       | 9113       | 9115       | 9117       | 9119       | 9121       | 9123       | 9125       |
|------------|------------|------------|------------|------------|------------|------------|------------|------------|------------|------------|------------|------------|------------|
| 0.02436400 | 0.02422000 | 0.02382400 | 0.02345800 | 0.02319200 | 0.02299800 | 0.02291700 | 0.02291400 | 0.02285300 | 0.02270000 | 0.02260500 | 0.02272400 | 0.02294500 | 0.02302000 |
| 0.01459100 | 0.01471500 | 0.01458900 | 0.01425900 | 0.01390100 | 0.01371100 | 0.01366500 | 0.01355800 | 0.01330400 | 0.01301800 | 0.01289000 | 0.01300400 | 0.01325200 | 0.01342600 |
| 0.03365000 | 0.03397300 | 0.03409000 | 0.03391800 | 0.03355200 | 0.03319200 | 0.03301800 | 0.03295400 | 0.03289600 | 0.03291700 | 0.03295800 | 0.03280500 | 0.03249100 | 0.03234000 |
| 0.03326400 | 0.03345400 | 0.03331500 | 0.03306700 | 0.03304300 | 0.03325800 | 0.03343900 | 0.03341000 | 0.03326100 | 0.03313900 | 0.03303900 | 0.03298200 | 0.03310700 | 0.03332700 |
| 0.02567100 | 0.02554200 | 0.02527700 | 0.02478400 | 0.02440400 | 0.02441800 | 0.02468700 | 0.02490400 | 0.02486900 | 0.02467700 | 0.02455700 | 0.02450700 | 0.02448000 | 0.02456600 |
| 0.03088000 | 0.03116200 | 0.03157100 | 0.03168300 | 0.03127300 | 0.03065700 | 0.03032300 | 0.03038700 | 0.03049100 | 0.03023100 | 0.02971900 | 0.02946400 | 0.02964200 | 0.02991000 |
| 0.03421900 | 0.03436400 | 0.03405600 | 0.03349600 | 0.03304600 | 0.03280500 | 0.03266400 | 0.03259400 | 0.03260600 | 0.03261100 | 0.03256200 | 0.03259200 | 0.03283600 | 0.03321500 |
| 0.02364600 | 0.02369800 | 0.02385400 | 0.02393000 | 0.02379100 | 0.02360800 | 0.02351200 | 0.02341600 | 0.02321200 | 0.02297400 | 0.02293500 | 0.02320200 | 0.02355500 | 0.02363900 |
| 0.02030400 | 0.02021600 | 0.02021600 | 0.02026200 | 0.02028400 | 0.02031000 | 0.02043800 | 0.02056000 | 0.02051000 | 0.02038800 | 0.02041300 | 0.02060000 | 0.02068900 | 0.02040600 |
| 0.03151200 | 0.03141100 | 0.03130500 | 0.03124300 | 0.03111700 | 0.03099400 | 0.03100600 | 0.03098500 | 0.03074400 | 0.03041400 | 0.03021300 | 0.03016800 | 0.03017900 | 0.03019800 |
| 0.03722600 | 0.03715100 | 0.03688600 | 0.03660900 | 0.03645600 | 0.03634800 | 0.03620800 | 0.03607000 | 0.03594300 | 0.03585300 | 0.03586300 | 0.03598000 | 0.03618500 | 0.03638300 |
| 0.02345600 | 0.02329700 | 0.02323900 | 0.02333900 | 0.02352900 | 0.02355000 | 0.02322600 | 0.02272500 | 0.02236700 | 0.02230400 | 0.02241500 | 0.02246200 | 0.02234200 | 0.02216800 |
| 0.02388800 | 0.02346300 | 0.02307700 | 0.02282300 | 0.02261900 | 0.02244400 | 0.02238800 | 0.02241900 | 0.02236200 | 0.02222200 | 0.02216900 | 0.02217200 | 0.02203900 | 0.02177500 |
| 0.01883900 | 0.01903900 | 0.01916800 | 0.01912500 | 0.01886400 | 0.01861400 | 0.01856800 | 0.01853400 | 0.01835800 | 0.01822000 | 0.01823200 | 0.01826300 | 0.01817800 | 0.01799300 |
| 0.02017600 | 0.02044800 | 0.02045500 | 0.02018300 | 0.01980200 | 0.01958200 | 0.01958300 | 0.01950900 | 0.01925800 | 0.01907700 | 0.01896900 | 0.01876900 | 0.01864800 | 0.01881600 |
| 0.02189200 | 0.02160100 | 0.02125800 | 0.02128500 | 0.02157900 | 0.02173200 | 0.02147000 | 0.02093900 | 0.02060100 | 0.02069500 | 0.02102900 | 0.02138500 | 0.02161500 | 0.02157100 |

| 9127       | 9129       | 9131       | 9133       | 9135       | 9136       | 9138       | 9140       | 9142       | 9144       | 9146       | 9148       | 9150       | 9152       |
|------------|------------|------------|------------|------------|------------|------------|------------|------------|------------|------------|------------|------------|------------|
| 0.02293200 | 0.02285700 | 0.02289000 | 0.02292500 | 0.02275200 | 0.02240200 | 0.02219000 | 0.02232500 | 0.02269000 | 0.02299300 | 0.02303600 | 0.02282300 | 0.02252400 | 0.02241900 |
| 0.01343600 | 0.01340800 | 0.01348300 | 0.01356200 | 0.01345500 | 0.01323400 | 0.01319100 | 0.01345100 | 0.01372900 | 0.01370300 | 0.01351100 | 0.01347300 | 0.01361800 | 0.01376100 |
| 0.03250500 | 0.03274100 | 0.03278900 | 0.03268800 | 0.03258100 | 0.03251700 | 0.03249600 | 0.03254100 | 0.03267700 | 0.03283600 | 0.03287300 | 0.03273200 | 0.03253100 | 0.03244400 |
| 0.03340400 | 0.03333800 | 0.03321400 | 0.03297400 | 0.03262400 | 0.03234400 | 0.03231100 | 0.03253900 | 0.03284400 | 0.03298600 | 0.03288700 | 0.03265400 | 0.03247000 | 0.03248700 |
| 0.02474100 | 0.02490800 | 0.02507800 | 0.02519700 | 0.02515100 | 0.02503700 | 0.02504300 | 0.02510900 | 0.02501400 | 0.02476300 | 0.02456500 | 0.02445200 | 0.02431200 | 0.02417300 |
| 0.03000400 | 0.03006200 | 0.03025600 | 0.03045700 | 0.03040400 | 0.03008700 | 0.02975400 | 0.02963800 | 0.02977100 | 0.02998900 | 0.03012600 | 0.03019500 | 0.03029200 | 0.03039500 |
| 0.03353600 | 0.03374800 | 0.03388300 | 0.03383300 | 0.03347400 | 0.03297000 | 0.03267800 | 0.03269400 | 0.03273500 | 0.03253500 | 0.03216300 | 0.03190800 | 0.03195200 | 0.03222500 |
| 0.02341000 | 0.02318000 | 0.02319500 | 0.02337600 | 0.02342900 | 0.02321800 | 0.02293500 | 0.02275000 | 0.02266500 | 0.02273500 | 0.02291200 | 0.02293600 | 0.02278000 | 0.02275200 |
| 0.01992000 | 0.01970500 | 0.01985100 | 0.01999100 | 0.01986000 | 0.01953000 | 0.01926000 | 0.01928800 | 0.01965400 | 0.02014100 | 0.02042900 | 0.02036600 | 0.02009200 | 0.01985500 |
| 0.03030100 | 0.03061300 | 0.03107800 | 0.03135700 | 0.03117300 | 0.03069700 | 0.03032800 | 0.03027700 | 0.03050700 | 0.03074100 | 0.03061100 | 0.03017200 | 0.02996800 | 0.03029400 |
| 0.03647400 | 0.03651000 | 0.03654800 | 0.03650900 | 0.03635500 | 0.03623000 | 0.03626400 | 0.03633100 | 0.03628800 | 0.03619900 | 0.03609700 | 0.03591300 | 0.03575400 | 0.03579500 |
| 0.02212200 | 0.02227900 | 0.02252100 | 0.02264500 | 0.02259600 | 0.02255200 | 0.02265800 | 0.02278700 | 0.02273600 | 0.02252000 | 0.02227300 | 0.02213600 | 0.02228000 | 0.02272400 |
| 0.02164300 | 0.02183200 | 0.02213800 | 0.02219500 | 0.02192300 | 0.02156300 | 0.02138000 | 0.02148300 | 0.02184500 | 0.02225100 | 0.02241500 | 0.02239100 | 0.02247000 | 0.02266600 |
| 0.01790700 | 0.01811700 | 0.01845800 | 0.01859700 | 0.01847200 | 0.01818000 | 0.01785700 | 0.01778100 | 0.01804200 | 0.01831900 | 0.01833600 | 0.01815700 | 0.01799800 | 0.01799700 |
| 0.01911600 | 0.01932300 | 0.01944100 | 0.01953000 | 0.01949900 | 0.01925200 | 0.01891800 | 0.01875600 | 0.01880300 | 0.01889900 | 0.01900500 | 0.01917900 | 0.01939200 | 0.01950900 |
| 0.02135800 | 0.02121100 | 0.02108000 | 0.02082600 | 0.02061600 | 0.02068300 | 0.02092000 | 0.02114400 | 0.02141100 | 0.02168600 | 0.02174600 | 0.02162300 | 0.02155100 | 0.02152900 |

| 9154       | 9156       | 9158       | 9160       | 9162       | 9163       | 9165       | 9167       | 9169       | 9171       | 9173       | 9175       | 9177       | 9179       |
|------------|------------|------------|------------|------------|------------|------------|------------|------------|------------|------------|------------|------------|------------|
| 0.02258800 | 0.02278600 | 0.02281200 | 0.02269500 | 0.02257700 | 0.02252000 | 0.02236500 | 0.02198500 | 0.02160700 | 0.02159900 | 0.02203500 | 0.02256100 | 0.02277300 | 0.02263900 |
| 0.01367600 | 0.01327400 | 0.01277500 | 0.01249700 | 0.01249600 | 0.01256300 | 0.01246300 | 0.01224100 | 0.01216000 | 0.01231800 | 0.01261600 | 0.01294000 | 0.01319400 | 0.01334500 |
| 0.03254400 | 0.03274100 | 0.03288200 | 0.03288800 | 0.03272800 | 0.03244600 | 0.03221900 | 0.03219900 | 0.03238900 | 0.03263800 | 0.03273100 | 0.03262500 | 0.03241700 | 0.03219600 |
| 0.03267400 | 0.03275200 | 0.03254000 | 0.03229700 | 0.03234500 | 0.03253200 | 0.03250500 | 0.03230900 | 0.03229000 | 0.03251600 | 0.03269200 | 0.03265600 | 0.03251000 | 0.03229900 |
| 0.02411400 | 0.02411800 | 0.02419500 | 0.02439600 | 0.02467200 | 0.02485900 | 0.02480400 | 0.02458900 | 0.02447700 | 0.02451900 | 0.02452300 | 0.02442900 | 0.02439600 | 0.02452400 |
| 0.03040500 | 0.03032700 | 0.03016900 | 0.02983900 | 0.02946400 | 0.02935700 | 0.02952600 | 0.02973000 | 0.02986100 | 0.02999600 | 0.03017600 | 0.03019900 | 0.02994100 | 0.02967800 |
| 0.03247200 | 0.03250400 | 0.03243100 | 0.03244200 | 0.03245700 | 0.03228000 | 0.03195500 | 0.03179900 | 0.03209200 | 0.03273600 | 0.03322200 | 0.03315800 | 0.03277600 | 0.03252600 |
| 0.02293800 | 0.02307600 | 0.02300100 | 0.02280600 | 0.02273500 | 0.02285000 | 0.02284100 | 0.02260000 | 0.02241500 | 0.02234000 | 0.02220700 | 0.02203700 | 0.02199000 | 0.02220700 |
| 0.01971800 | 0.01959500 | 0.01951200 | 0.01946900 | 0.01932000 | 0.01906400 | 0.01888200 | 0.01885900 | 0.01897500 | 0.01923300 | 0.01957100 | 0.01971500 | 0.01950600 | 0.01923300 |
| 0.03079200 | 0.03094900 | 0.03072800 | 0.03054400 | 0.03064000 | 0.03067900 | 0.03027100 | 0.02973800 | 0.02970300 | 0.03011000 | 0.03036900 | 0.03021800 | 0.02996100 | 0.03003300 |
| 0.03589100 | 0.03581700 | 0.03575500 | 0.03592600 | 0.03608700 | 0.03592300 | 0.03555800 | 0.03538700 | 0.03556800 | 0.03586500 | 0.03593000 | 0.03560100 | 0.03512400 | 0.03503200 |
| 0.02319900 | 0.02335800 | 0.02303000 | 0.02244300 | 0.02206300 | 0.02205400 | 0.02216000 | 0.02215800 | 0.02207600 | 0.02203200 | 0.02207400 | 0.02209200 | 0.02195300 | 0.02177100 |
| 0.02266200 | 0.02235600 | 0.02212500 | 0.02225900 | 0.02248300 | 0.02238600 | 0.02195400 | 0.02158600 | 0.02166100 | 0.02199900 | 0.02209400 | 0.02185500 | 0.02167800 | 0.02185300 |
| 0.01806900 | 0.01802100 | 0.01783500 | 0.01768500 | 0.01773500 | 0.01796600 | 0.01815000 | 0.01811300 | 0.01796200 | 0.01794100 | 0.01806700 | 0.01810400 | 0.01797000 | 0.01784600 |
| 0.01939400 | 0.01906400 | 0.01875000 | 0.01870100 | 0.01884200 | 0.01881100 | 0.01850300 | 0.01827200 | 0.01840100 | 0.01872800 | 0.01892000 | 0.01888100 | 0.01874900 | 0.01862000 |
| 0.02136800 | 0.02107800 | 0.02082300 | 0.02063000 | 0.02052200 | 0.02066500 | 0.02099600 | 0.02121100 | 0.02126200 | 0.02128100 | 0.02121700 | 0.02099200 | 0.02071900 | 0.02057600 |



| 9181       | 9183       | 9185       | 9187       | 9189       | 9190       | 9192       | 9194       | 9196       | 9198       | 9200       | 9202       | 9204       | 9206       |
|------------|------------|------------|------------|------------|------------|------------|------------|------------|------------|------------|------------|------------|------------|
| 0.02242700 | 0.02238200 | 0.02252100 | 0.02266400 | 0.02265900 | 0.02249700 | 0.02230200 | 0.02228200 | 0.02246100 | 0.02266600 | 0.02283000 | 0.02299300 | 0.02307600 | 0.02296400 |
| 0.01338500 | 0.01329400 | 0.01317600 | 0.01329800 | 0.01368600 | 0.01390000 | 0.01374300 | 0.01359800 | 0.01361200 | 0.01358000 | 0.01357100 | 0.01366100 | 0.01357700 | 0.01327200 |
| 0.03209300 | 0.03221200 | 0.03242400 | 0.03255800 | 0.03260400 | 0.03256400 | 0.03242700 | 0.03223100 | 0.03205900 | 0.03212700 | 0.03255500 | 0.03302700 | 0.03312400 | 0.03288500 |
| 0.03205000 | 0.03199000 | 0.03223300 | 0.03249200 | 0.03247000 | 0.03223700 | 0.03208300 | 0.03216500 | 0.03239300 | 0.03264300 | 0.03286700 | 0.03293000 | 0.03273300 | 0.03257100 |
| 0.02473900 | 0.02494500 | 0.02516600 | 0.02545900 | 0.02563700 | 0.02539500 | 0.02485600 | 0.02443000 | 0.02431400 | 0.02452100 | 0.02484500 | 0.02487700 | 0.02460600 | 0.02446400 |
| 0.02964600 | 0.02978000 | 0.02998100 | 0.03022800 | 0.03054800 | 0.03086700 | 0.03089300 | 0.03051500 | 0.03012600 | 0.03010300 | 0.03028600 | 0.03029000 | 0.03004800 | 0.02980800 |
| 0.03249200 | 0.03255800 | 0.03265700 | 0.03275000 | 0.03280000 | 0.03279900 | 0.03280900 | 0.03281700 | 0.03269600 | 0.03257200 | 0.03270100 | 0.03290900 | 0.03279600 | 0.03236200 |
| 0.02261900 | 0.02289300 | 0.02289300 | 0.02290600 | 0.02303500 | 0.02306300 | 0.02297100 | 0.02285300 | 0.02267800 | 0.02257300 | 0.02275900 | 0.02308100 | 0.02310500 | 0.02274800 |
| 0.01922300 | 0.01943300 | 0.01970300 | 0.01998500 | 0.02020100 | 0.02022000 | 0.02004200 | 0.01981500 | 0.01969100 | 0.01974700 | 0.01996500 | 0.02019800 | 0.02023400 | 0.02003600 |
| 0.03044500 | 0.03079900 | 0.03087900 | 0.03087700 | 0.03097100 | 0.03102100 | 0.03089300 | 0.03077100 | 0.03083400 | 0.03094600 | 0.03091700 | 0.03074400 | 0.03058200 | 0.03060100 |
| 0.03547800 | 0.03600400 | 0.03622400 | 0.03619600 | 0.03612000 | 0.03613100 | 0.03617300 | 0.03608300 | 0.03593200 | 0.03594300 | 0.03611300 | 0.03622500 | 0.03610200 | 0.03584700 |
| 0.02178500 | 0.02202900 | 0.02236000 | 0.02264300 | 0.02280500 | 0.02280900 | 0.02268400 | 0.02257400 | 0.02257700 | 0.02264600 | 0.02277300 | 0.02292400 | 0.02288800 | 0.02264400 |
| 0.02223900 | 0.02254200 | 0.02268600 | 0.02275300 | 0.02270400 | 0.02248900 | 0.02228100 | 0.02224500 | 0.02228600 | 0.02226800 | 0.02224200 | 0.02224700 | 0.02213000 | 0.02183800 |
| 0.01782800 | 0.01787000 | 0.01803200 | 0.01832400 | 0.01845700 | 0.01816300 | 0.01767600 | 0.01750500 | 0.01778400 | 0.01819900 | 0.01843700 | 0.01847100 | 0.01843400 | 0.01841700 |
| 0.01853900 | 0.01858300 | 0.01870100 | 0.01874900 | 0.01876500 | 0.01882500 | 0.01880200 | 0.01865000 | 0.01851300 | 0.01847300 | 0.01854500 | 0.01874000 | 0.01901800 | 0.01930700 |
| 0.02064300 | 0.02082500 | 0.02094800 | 0.02102400 | 0.02110900 | 0.02098800 | 0.02055500 | 0.02018200 | 0.02024400 | 0.02064200 | 0.02105300 | 0.02125500 | 0.02112300 | 0.02076600 |

| 9208       | 9210       | 9212       | 9214       | 9216       | 9217       | 9219       | 9221       | 9223       | 9225       | 9227       | 9229       | 9231       | 9233       |
|------------|------------|------------|------------|------------|------------|------------|------------|------------|------------|------------|------------|------------|------------|
| 0.02268500 | 0.02236200 | 0.02209000 | 0.02195200 | 0.02201000 | 0.02220300 | 0.02239400 | 0.02252800 | 0.02260600 | 0.02263200 | 0.02267800 | 0.02282300 | 0.02305400 | 0.02326300 |
| 0.01305000 | 0.01294000 | 0.01271100 | 0.01241600 | 0.01234300 | 0.01252900 | 0.01272200 | 0.01283000 | 0.01301800 | 0.01324700 | 0.01330900 | 0.01333300 | 0.01354800 | 0.01378500 |
| 0.03265500 | 0.03257900 | 0.03255700 | 0.03249200 | 0.03243900 | 0.03253400 | 0.03282200 | 0.03319100 | 0.03343800 | 0.03341200 | 0.03320200 | 0.03308200 | 0.03319400 | 0.03337000 |
| 0.03279100 | 0.03311200 | 0.03300900 | 0.03259700 | 0.03238700 | 0.03250300 | 0.03271000 | 0.03284900 | 0.03289300 | 0.03289000 | 0.03297600 | 0.03320100 | 0.03346000 | 0.03364000 |
| 0.02457700 | 0.02469700 | 0.02471400 | 0.02469300 | 0.02466600 | 0.02465900 | 0.02472700 | 0.02492500 | 0.02518300 | 0.02528900 | 0.02520100 | 0.02504000 | 0.02485400 | 0.02479400 |
| 0.02971300 | 0.02965100 | 0.02950300 | 0.02934600 | 0.02940700 | 0.02979700 | 0.03027700 | 0.03054200 | 0.03056100 | 0.03046000 | 0.03035000 | 0.03031000 | 0.03036100 | 0.03048500 |
| 0.03196100 | 0.03186900 | 0.03205000 | 0.03226700 | 0.03242400 | 0.03252700 | 0.03243400 | 0.03215200 | 0.03200600 | 0.03218500 | 0.03257100 | 0.03297100 | 0.03321900 | 0.03324500 |
| 0.02241300 | 0.02234100 | 0.02232100 | 0.02223100 | 0.02229200 | 0.02261700 | 0.02296300 | 0.02309700 | 0.02310600 | 0.02318300 | 0.02334800 | 0.02351500 | 0.02366900 | 0.02386200 |
| 0.01975400 | 0.01946000 | 0.01912200 | 0.01879500 | 0.01871700 | 0.01908200 | 0.01970300 | 0.02012200 | 0.02013400 | 0.02001500 | 0.02009700 | 0.02034800 | 0.02053800 | 0.02056500 |
| 0.03072700 | 0.03065700 | 0.03024300 | 0.02968800 | 0.02941300 | 0.02968400 | 0.03030300 | 0.03087200 | 0.03120200 | 0.03127300 | 0.03120100 | 0.03121900 | 0.03136600 | 0.03147300 |
| 0.03571200 | 0.03568800 | 0.03560000 | 0.03550700 | 0.03561500 | 0.03594200 | 0.03626500 | 0.03635300 | 0.03619300 | 0.03599900 | 0.03600700 | 0.03625300 | 0.03658700 | 0.03682900 |
| 0.02247500 | 0.02248200 | 0.02247600 | 0.02231500 | 0.02209000 | 0.02201700 | 0.02222900 | 0.02267700 | 0.02312600 | 0.02329200 | 0.02313600 | 0.02297300 | 0.02311400 | 0.02344400 |
| 0.02162200 | 0.02162000 | 0.02159200 | 0.02143600 | 0.02139900 | 0.02151200 | 0.02147500 | 0.02125400 | 0.02114900 | 0.02132500 | 0.02173400 | 0.02226300 | 0.02277700 | 0.02314800 |
| 0.01840500 | 0.01826500 | 0.01787800 | 0.01743300 | 0.01730000 | 0.01749000 | 0.01767000 | 0.01771300 | 0.01773700 | 0.01774500 | 0.01769500 | 0.01771700 | 0.01797000 | 0.01834200 |
| 0.01944900 | 0.01929300 | 0.01894400 | 0.01865400 | 0.01853100 | 0.01858500 | 0.01878700 | 0.01899200 | 0.01912100 | 0.01929100 | 0.01949900 | 0.01956800 | 0.01952700 | 0.01953800 |
| 0.02046400 | 0.02026300 | 0.02011100 | 0.02017600 | 0.02054700 | 0.02095700 | 0.02115600 | 0.02122400 | 0.02129900 | 0.02130800 | 0.02121500 | 0.02119200 | 0.02134000 | 0.02155900 |

| 9235       | 9237       | 9239       | 9241       | 9243       | 9244       | 9246       | 9248       | 9250       | 9252       | 9254       | 9256       | 9258       | 9260       |
|------------|------------|------------|------------|------------|------------|------------|------------|------------|------------|------------|------------|------------|------------|
| 0.02328100 | 0.02312700 | 0.02308800 | 0.02326900 | 0.02347300 | 0.02358700 | 0.02368800 | 0.02383900 | 0.02398000 | 0.02403500 | 0.02405800 | 0.02410600 | 0.02410700 | 0.02406300 |
| 0.01383900 | 0.01386800 | 0.01405700 | 0.01432500 | 0.01455300 | 0.01473400 | 0.01486600 | 0.01493900 | 0.01499500 | 0.01510100 | 0.01521900 | 0.01521700 | 0.01506400 | 0.01491700 |
| 0.03340700 | 0.03345000 | 0.03367700 | 0.03395100 | 0.03423700 | 0.03468500 | 0.03515700 | 0.03530300 | 0.03501500 | 0.03458600 | 0.03447000 | 0.03479500 | 0.03524600 | 0.03553000 |
| 0.03360100 | 0.03332900 | 0.03310900 | 0.03313600 | 0.03333700 | 0.03370900 | 0.03419100 | 0.03442700 | 0.03423000 | 0.03390400 | 0.03380400 | 0.03393600 | 0.03414000 | 0.03437100 |
| 0.02504200 | 0.02546800 | 0.02583900 | 0.02600400 | 0.02589000 | 0.02565100 | 0.02549000 | 0.02541500 | 0.02543500 | 0.02557500 | 0.02569200 | 0.02569600 | 0.02573600 | 0.02580500 |
| 0.03070900 | 0.03111100 | 0.03159500 | 0.03185300 | 0.03180100 | 0.03166300 | 0.03150600 | 0.03133200 | 0.03139200 | 0.03174100 | 0.03201800 | 0.03196800 | 0.03175000 | 0.03167300 |
| 0.03317700 | 0.03323900 | 0.03346500 | 0.03371400 | 0.03403100 | 0.03449400 | 0.03480500 | 0.03471300 | 0.03455800 | 0.03478700 | 0.03521600 | 0.03525200 | 0.03479200 | 0.03441600 |
| 0.02403100 | 0.02402600 | 0.02386600 | 0.02375300 | 0.02386000 | 0.02415200 | 0.02442900 | 0.02455100 | 0.02458500 | 0.02477500 | 0.02525200 | 0.02570300 | 0.02569700 | 0.02534100 |
| 0.02051800 | 0.02059700 | 0.02093600 | 0.02144800 | 0.02191100 | 0.02215700 | 0.02209700 | 0.02175700 | 0.02141600 | 0.02147400 | 0.02193200 | 0.02230400 | 0.02232900 | 0.02223400 |
| 0.03147000 | 0.03142300 | 0.03135100 | 0.03124700 | 0.03124000 | 0.03147400 | 0.03180400 | 0.03201300 | 0.03218500 | 0.03249800 | 0.03295500 | 0.03336100 | 0.03339500 | 0.03302500 |
| 0.03694000 | 0.03705500 | 0.03718900 | 0.03720300 | 0.03716000 | 0.03729600 | 0.03763500 | 0.03789700 | 0.03786300 | 0.03764900 | 0.03755700 | 0.03770000 | 0.03787400 | 0.03791700 |
| 0.02363800 | 0.02369200 | 0.02378200 | 0.02388200 | 0.02396000 | 0.02406400 | 0.02408600 | 0.02396300 | 0.02392200 | 0.02415100 | 0.02450300 | 0.02466600 | 0.02457400 | 0.02449700 |
| 0.02327200 | 0.02319800 | 0.02312700 | 0.02320100 | 0.02343500 | 0.02368500 | 0.02373400 | 0.02366300 | 0.02373700 | 0.02394300 | 0.02413900 | 0.02436600 | 0.02462900 | 0.02478200 |
| 0.01848500 | 0.01832900 | 0.01820100 | 0.01829400 | 0.01853900 | 0.01879500 | 0.01887200 | 0.01867200 | 0.01840100 | 0.01840000 | 0.01864800 | 0.01877600 | 0.01874800 | 0.01884100 |
| 0.01957400 | 0.01952700 | 0.01942100 | 0.01934700 | 0.01935900 | 0.01949800 | 0.01976500 | 0.02003200 | 0.02015100 | 0.02015900 | 0.02017400 | 0.02021500 | 0.02028100 | 0.02037500 |
| 0.02171700 | 0.02180000 | 0.02184500 | 0.02181500 | 0.02174300 | 0.02178000 | 0.02197400 | 0.02221600 | 0.02236600 | 0.02242800 | 0.02261000 | 0.02293100 | 0.02297400 | 0.02254500 |

| 9262       | 9264       | 9266       | 9268       | 9270       | 9271       | 9273       | 9275       | 9277       | 9279       | 9281       | 9283       | 9285       | 9287       |
|------------|------------|------------|------------|------------|------------|------------|------------|------------|------------|------------|------------|------------|------------|
| 0.02410800 | 0.02420000 | 0.02414100 | 0.02394700 | 0.02381500 | 0.02388600 | 0.02416600 | 0.02445300 | 0.02440800 | 0.02395300 | 0.02341700 | 0.02312800 | 0.02315400 | 0.02335600 |
| 0.01498500 | 0.01521900 | 0.01532900 | 0.01533200 | 0.01549300 | 0.01575800 | 0.01585500 | 0.01568100 | 0.01540300 | 0.01526800 | 0.01520700 | 0.01494900 | 0.01454600 | 0.01424900 |
| 0.03560400 | 0.03547600 | 0.03519300 | 0.03495600 | 0.03495300 | 0.03515000 | 0.03530600 | 0.03520700 | 0.03493300 | 0.03470700 | 0.03455000 | 0.03435700 | 0.03413400 | 0.03394600 |
| 0.03456000 | 0.03451300 | 0.03426600 | 0.03407700 | 0.03404900 | 0.03418900 | 0.03450100 | 0.03473000 | 0.03454100 | 0.03403500 | 0.03362100 | 0.03340100 | 0.03321300 | 0.03312600 |
| 0.02566100 | 0.02535000 | 0.02517700 | 0.02523000 | 0.02547200 | 0.02584000 | 0.02609600 | 0.02612100 | 0.02615400 | 0.02622900 | 0.02592900 | 0.02519100 | 0.02459500 | 0.02446700 |
| 0.03179500 | 0.03190400 | 0.03189600 | 0.03187500 | 0.03195600 | 0.03221000 | 0.03249200 | 0.03246500 | 0.03213600 | 0.03190000 | 0.03187000 | 0.03170300 | 0.03126000 | 0.03088000 |
| 0.03454100 | 0.03488400 | 0.03494200 | 0.03463000 | 0.03428500 | 0.03420100 | 0.03429700 | 0.03435500 | 0.03438400 | 0.03445200 | 0.03436000 | 0.03396800 | 0.03354000 | 0.03334200 |
| 0.02511000 | 0.02505100 | 0.02478000 | 0.02430000 | 0.02406200 | 0.02421000 | 0.02442700 | 0.02443500 | 0.02429400 | 0.02417400 | 0.02405700 | 0.02385500 | 0.02362100 | 0.02347900 |
| 0.02219300 | 0.02219700 | 0.02225700 | 0.02235800 | 0.02247100 | 0.02255800 | 0.02249400 | 0.02221800 | 0.02191800 | 0.02184000 | 0.02195200 | 0.02196000 | 0.02166800 | 0.02122900 |
| 0.03265800 | 0.03253900 | 0.03243100 | 0.03217800 | 0.03202600 | 0.03213100 | 0.03231200 | 0.03239800 | 0.03236600 | 0.03223200 | 0.03198100 | 0.03156900 | 0.03114700 | 0.03107300 |
| 0.03790700 | 0.03790100 | 0.03789400 | 0.03789100 | 0.03785200 | 0.03775200 | 0.03763200 | 0.03755500 | 0.03754200 | 0.03752200 | 0.03738500 | 0.03705400 | 0.03660200 | 0.03634200 |
| 0.02464400 | 0.02487000 | 0.02488400 | 0.02464600 | 0.02439100 | 0.02423800 | 0.02414000 | 0.02418200 | 0.02436700 | 0.02441400 | 0.02422600 | 0.02406400 | 0.02409500 | 0.02418400 |
| 0.02471600 | 0.02434000 | 0.02372800 | 0.02333000 | 0.02349800 | 0.02406000 | 0.02456200 | 0.02457600 | 0.02397500 | 0.02322300 | 0.02298900 | 0.02329900 | 0.02354600 | 0.02339700 |
| 0.01900200 | 0.01897700 | 0.01886200 | 0.01893900 | 0.01919100 | 0.01932600 | 0.01919100 | 0.01894300 | 0.01876600 | 0.01864100 | 0.01852600 | 0.01852100 | 0.01861100 | 0.01852700 |
| 0.02043200 | 0.02039900 | 0.02027800 | 0.02010600 | 0.01999200 | 0.01995800 | 0.01988900 | 0.01974400 | 0.01962800 | 0.01963400 | 0.01961600 | 0.01940100 | 0.01921800 | 0.01934100 |
| 0.02220800 | 0.02243900 | 0.02287200 | 0.02295500 | 0.02266700 | 0.02232700 | 0.02220700 | 0.02245100 | 0.02295600 | 0.02324900 | 0.02299100 | 0.02242800 | 0.02190300 | 0.02139900 |

| 9289       | 9291       | 9293       | 9295       | 9297       | 9298       | 9300       | 9302       | 9304       | 9306       | 9308       | 9310       | 9312       | 9314       |
|------------|------------|------------|------------|------------|------------|------------|------------|------------|------------|------------|------------|------------|------------|
| 0.02341400 | 0.02316700 | 0.02287400 | 0.02278700 | 0.02290800 | 0.02312100 | 0.02317500 | 0.02293700 | 0.02261000 | 0.02239500 | 0.02235900 | 0.02257700 | 0.02295700 | 0.02314600 |
| 0.01408200 | 0.01397200 | 0.01392100 | 0.01386800 | 0.01372800 | 0.01360300 | 0.01363300 | 0.01373100 | 0.01375200 | 0.01378500 | 0.01401500 | 0.01434000 | 0.01439200 | 0.01404000 |
| 0.03385400 | 0.03395200 | 0.03412700 | 0.03406500 | 0.03384200 | 0.03391200 | 0.03422500 | 0.03426700 | 0.03395500 | 0.03369200 | 0.03369900 | 0.03380400 | 0.03379900 | 0.03373500 |
| 0.03328600 | 0.03351600 | 0.03351700 | 0.03331100 | 0.03316400 | 0.03321400 | 0.03335500 | 0.03337700 | 0.03318300 | 0.03297100 | 0.03303000 | 0.03334900 | 0.03364600 | 0.03361900 |
| 0.02461200 | 0.02487300 | 0.02511200 | 0.02507700 | 0.02476200 | 0.02441300 | 0.02419400 | 0.02419200 | 0.02446600 | 0.02489100 | 0.02526300 | 0.02551700 | 0.02562400 | 0.02552000 |
| 0.03079400 | 0.03090900 | 0.03111800 | 0.03126500 | 0.03116600 | 0.03095400 | 0.03094100 | 0.03111400 | 0.03119100 | 0.03106700 | 0.03090200 | 0.03086700 | 0.03101600 | 0.03123300 |
| 0.03331900 | 0.03335700 | 0.03337400 | 0.03322500 | 0.03299200 | 0.03297600 | 0.03315400 | 0.03326300 | 0.03334500 | 0.03356400 | 0.03379600 | 0.03385500 | 0.03375200 | 0.03357500 |
| 0.02347700 | 0.02351600 | 0.02351600 | 0.02362600 | 0.02384400 | 0.02381500 | 0.02353900 | 0.02346200 | 0.02360200 | 0.02360600 | 0.02350700 | 0.02357600 | 0.02374500 | 0.02371400 |
| 0.02094200 | 0.02090500 | 0.02102600 | 0.02113200 | 0.02104600 | 0.02083300 | 0.02076300 | 0.02093300 | 0.02119300 | 0.02136700 | 0.02140600 | 0.02139100 | 0.02136700 | 0.02122700 |
| 0.03139100 | 0.03171300 | 0.03171800 | 0.03150400 | 0.03144100 | 0.03163000 | 0.03176600 | 0.03170500 | 0.03160600 | 0.03154800 | 0.03157400 | 0.03181600 | 0.03216900 | 0.03228300 |
| 0.03649900 | 0.03686900 | 0.03707700 | 0.03699200 | 0.03677400 | 0.03661000 | 0.03649700 | 0.03636500 | 0.03629200 | 0.03634000 | 0.03645300 | 0.03657600 | 0.03671200 | 0.03691200 |
| 0.02414500 | 0.02396200 | 0.02376700 | 0.02364200 | 0.02351700 | 0.02331800 | 0.02314300 | 0.02308300 | 0.02302600 | 0.02298800 | 0.02317900 | 0.02350300 | 0.02365100 | 0.02357300 |
| 0.02312700 | 0.02305000 | 0.02307800 | 0.02297000 | 0.02281000 | 0.02293100 | 0.02330600 | 0.02342000 | 0.02299400 | 0.02245100 | 0.02229800 | 0.02250100 | 0.02273500 | 0.02277800 |
| 0.01823700 | 0.01813500 | 0.01832600 | 0.01842000 | 0.01821900 | 0.01802900 | 0.01819100 | 0.01857500 | 0.01872000 | 0.01847900 | 0.01819500 | 0.01820500 | 0.01848900 | 0.01873700 |
| 0.01956000 | 0.01958500 | 0.01948900 | 0.01943800 | 0.01947000 | 0.01960500 | 0.01979100 | 0.01986300 | 0.01971100 | 0.01941700 | 0.01922100 | 0.01926700 | 0.01940700 | 0.01939800 |
| 0.02094400 | 0.02084500 | 0.02120700 | 0.02167700 | 0.02188000 | 0.02174700 | 0.02142900 | 0.02115500 | 0.02102700 | 0.02099200 | 0.02107300 | 0.02135600 | 0.02172300 | 0.02189400 |

| 9316       | 9318       | 9320       | 9322       | 9324       | 9325       | 9327       | 9329       | 9331       | 9333       | 9335       | 9337       | 9339       | 9341       |
|------------|------------|------------|------------|------------|------------|------------|------------|------------|------------|------------|------------|------------|------------|
| 0.02294900 | 0.02259400 | 0.02241400 | 0.02250200 | 0.02278900 | 0.02317600 | 0.02348600 | 0.02352800 | 0.02340700 | 0.02345100 | 0.02362900 | 0.02355400 | 0.02318300 | 0.02293600 |
| 0.01355900 | 0.01325000 | 0.01314000 | 0.01319900 | 0.01350500 | 0.01400100 | 0.01444500 | 0.01463500 | 0.01449800 | 0.01420400 | 0.01401100 | 0.01392300 | 0.01374500 | 0.01350300 |
| 0.03375900 | 0.03376400 | 0.03354600 | 0.03327500 | 0.03333400 | 0.03367100 | 0.03383900 | 0.03363700 | 0.03332000 | 0.03327900 | 0.03359700 | 0.03395500 | 0.03404500 | 0.03400000 |
| 0.03317800 | 0.03264000 | 0.03238000 | 0.03228100 | 0.03217200 | 0.03240000 | 0.03308200 | 0.03363700 | 0.03364100 | 0.03326600 | 0.03291600 | 0.03284600 | 0.03290700 | 0.03288800 |
| 0.02527600 | 0.02497300 | 0.02453000 | 0.02410200 | 0.02416500 | 0.02476100 | 0.02532100 | 0.02536900 | 0.02493900 | 0.02448600 | 0.02441200 | 0.02457000 | 0.02455300 | 0.02436900 |
| 0.03123300 | 0.03087500 | 0.03042700 | 0.03026000 | 0.03048900 | 0.03092200 | 0.03120300 | 0.03117500 | 0.03100200 | 0.03088500 | 0.03092800 | 0.03104900 | 0.03095800 | 0.03062700 |
| 0.03342600 | 0.03342300 | 0.03351700 | 0.03358900 | 0.03361300 | 0.03354800 | 0.03345500 | 0.03350600 | 0.03371400 | 0.03398400 | 0.03419400 | 0.03412700 | 0.03368000 | 0.03310300 |
| 0.02345900 | 0.02327500 | 0.02324200 | 0.02313200 | 0.02301000 | 0.02314000 | 0.02343900 | 0.02362900 | 0.02352300 | 0.02313000 | 0.02279900 | 0.02278800 | 0.02287400 | 0.02285800 |
| 0.02095300 | 0.02077300 | 0.02078200 | 0.02074000 | 0.02057400 | 0.02049400 | 0.02056400 | 0.02075100 | 0.02105300 | 0.02132200 | 0.02137400 | 0.02123600 | 0.02104900 | 0.02095800 |
| 0.03209900 | 0.03191400 | 0.03190900 | 0.03199700 | 0.03204500 | 0.03196700 | 0.03187000 | 0.03198300 | 0.03212600 | 0.03188300 | 0.03136600 | 0.03104200 | 0.03097500 | 0.03093400 |
| 0.03709800 | 0.03704400 | 0.03670900 | 0.03636500 | 0.03631300 | 0.03659900 | 0.03696300 | 0.03701700 | 0.03664800 | 0.03621300 | 0.03613600 | 0.03636800 | 0.03644100 | 0.03615100 |
| 0.02338900 | 0.02320200 | 0.02308900 | 0.02306600 | 0.02317300 | 0.02347100 | 0.02378600 | 0.02377000 | 0.02344300 | 0.02326400 | 0.02345900 | 0.02368300 | 0.02354500 | 0.02317500 |
| 0.02256800 | 0.02225400 | 0.02200600 | 0.02176900 | 0.02164900 | 0.02195900 | 0.02249100 | 0.02269900 | 0.02260800 | 0.02265800 | 0.02292600 | 0.02310600 | 0.02303800 | 0.02290300 |
| 0.01868200 | 0.01837000 | 0.01808800 | 0.01812000 | 0.01845500 | 0.01866600 | 0.01833600 | 0.01770500 | 0.01747500 | 0.01778500 | 0.01802100 | 0.01788800 | 0.01768000 | 0.01757200 |
| 0.01923400 | 0.01917400 | 0.01937100 | 0.01963100 | 0.01975400 | 0.01988400 | 0.02013900 | 0.02021900 | 0.01987600 | 0.01938600 | 0.01910500 | 0.01905400 | 0.01906900 | 0.01903900 |
| 0.02166400 | 0.02113100 | 0.02072300 | 0.02079800 | 0.02122400 | 0.02156000 | 0.02166800 | 0.02180400 | 0.02198200 | 0.02194600 | 0.02182400 | 0.02192400 | 0.02208500 | 0.02200300 |

| 9343       | 9345       | 9347       | 9349       | 9351       | 9352       | 9354       | 9356       | 9358       | 9360       | 9362       | 9364       | 9366       | 9368       |
|------------|------------|------------|------------|------------|------------|------------|------------|------------|------------|------------|------------|------------|------------|
| 0.02302100 | 0.02310700 | 0.02288900 | 0.02268600 | 0.02282000 | 0.02299000 | 0.02296800 | 0.02292900 | 0.02279100 | 0.02245600 | 0.02229900 | 0.02249400 | 0.02267700 | 0.02264300 |
| 0.01358200 | 0.01412200 | 0.01461800 | 0.01456000 | 0.01399700 | 0.01341300 | 0.01335300 | 0.01382400 | 0.01421000 | 0.01415500 | 0.01397400 | 0.01398600 | 0.01410400 | 0.01420300 |
| 0.03414000 | 0.03433500 | 0.03419100 | 0.03376800 | 0.03345800 | 0.03343500 | 0.03359400 | 0.03375800 | 0.03380900 | 0.03379300 | 0.03391300 | 0.03418700 | 0.03434300 | 0.03432500 |
| 0.03296800 | 0.03325700 | 0.03345000 | 0.03336900 | 0.03315500 | 0.03294000 | 0.03287100 | 0.03305500 | 0.03328600 | 0.03344400 | 0.03372700 | 0.03401000 | 0.03396800 | 0.03380600 |
| 0.02436700 | 0.02463100 | 0.02490500 | 0.02510400 | 0.02530400 | 0.02535100 | 0.02513100 | 0.02486800 | 0.02471300 | 0.02460000 | 0.02456800 | 0.02465900 | 0.02474000 | 0.02471300 |
| 0.03044700 | 0.03054100 | 0.03061000 | 0.03054800 | 0.03051500 | 0.03055800 | 0.03062900 | 0.03071300 | 0.03073200 | 0.03063400 | 0.03059600 | 0.03077800 | 0.03105900 | 0.03120500 |
| 0.03279500 | 0.03286700 | 0.03317600 | 0.03361100 | 0.03394500 | 0.03385800 | 0.03341300 | 0.03302000 | 0.03286000 | 0.03281900 | 0.03289200 | 0.03315700 | 0.03350400 | 0.03376600 |
| 0.02295900 | 0.02331300 | 0.02362000 | 0.02364100 | 0.02354900 | 0.02355200 | 0.02360800 | 0.02359600 | 0.02346900 | 0.02332100 | 0.02337600 | 0.02363700 | 0.02379900 | 0.02379500 |
| 0.02110200 | 0.02142100 | 0.02162300 | 0.02158400 | 0.02146600 | 0.02131700 | 0.02102000 | 0.02062800 | 0.02042800 | 0.02061700 | 0.02098200 | 0.02112500 | 0.02109500 | 0.02142000 |
| 0.03096600 | 0.03122600 | 0.03154200 | 0.03172200 | 0.03178100 | 0.03168900 | 0.03156300 | 0.03172900 | 0.03208000 | 0.03218400 | 0.03199700 | 0.03168100 | 0.03131800 | 0.03118300 |
| 0.03595600 | 0.03625500 | 0.03678000 | 0.03713100 | 0.03711400 | 0.03664500 | 0.03600800 | 0.03572100 | 0.03590600 | 0.03629500 | 0.03665100 | 0.03685700 | 0.03687700 | 0.03683000 |
| 0.02301000 | 0.02315100 | 0.02330700 | 0.02324600 | 0.02300500 | 0.02281000 | 0.02291100 | 0.02330900 | 0.02363800 | 0.02357000 | 0.02333700 | 0.02332100 | 0.02347100 | 0.02357800 |
| 0.02288000 | 0.02281800 | 0.02248200 | 0.02207500 | 0.02204200 | 0.02239900 | 0.02285000 | 0.02321100 | 0.02333100 | 0.02315800 | 0.02293400 | 0.02281400 | 0.02271100 | 0.02272300 |
| 0.01757000 | 0.01770300 | 0.01787800 | 0.01797600 | 0.01794400 | 0.01775300 | 0.01761900 | 0.01779200 | 0.01798400 | 0.01783500 | 0.01769100 | 0.01792900 | 0.01818300 | 0.01817200 |
| 0.01905900 | 0.01920700 | 0.01930600 | 0.01926000 | 0.01920200 | 0.01917400 | 0.01912600 | 0.01907400 | 0.01902600 | 0.01899700 | 0.01904300 | 0.01912200 | 0.01914600 | 0.01915400 |
| 0.02175100 | 0.02152200 | 0.02137500 | 0.02134300 | 0.02143800 | 0.02157500 | 0.02167800 | 0.02176800 | 0.02179800 | 0.02166200 | 0.02144700 | 0.02135000 | 0.02145600 | 0.02174500 |

| 9370       | 9372       | 9374       | 9376       | 9378       | 9379       | 9381       | 9383       | 9385       | 9387       | 9389       | 9391       | 9393       | 9395       |
|------------|------------|------------|------------|------------|------------|------------|------------|------------|------------|------------|------------|------------|------------|
| 0.02263400 | 0.02290600 | 0.02339900 | 0.02395400 | 0.02456900 | 0.02508200 | 0.02509800 | 0.02461400 | 0.02411600 | 0.02390700 | 0.02391300 | 0.02406200 | 0.02428400 | 0.02446900 |
| 0.01432400 | 0.01453400 | 0.01477200 | 0.01490000 | 0.01487900 | 0.01481500 | 0.01482900 | 0.01494000 | 0.01511000 | 0.01531400 | 0.01551800 | 0.01569800 | 0.01582600 | 0.01587700 |
| 0.03438200 | 0.03458500 | 0.03477300 | 0.03488700 | 0.03503900 | 0.03524100 | 0.03537600 | 0.03541900 | 0.03538500 | 0.03520300 | 0.03497900 | 0.03498500 | 0.03524400 | 0.03557400 |
| 0.03385800 | 0.03407000 | 0.03433500 | 0.03459000 | 0.03477700 | 0.03489500 | 0.03476500 | 0.03422400 | 0.03362400 | 0.03349400 | 0.03395300 | 0.03468300 | 0.03515600 | 0.03516100 |
| 0.02465100 | 0.02472900 | 0.02504400 | 0.02552300 | 0.02607300 | 0.02650200 | 0.02651000 | 0.02618900 | 0.02596500 | 0.02593200 | 0.02588900 | 0.02589900 | 0.02614900 | 0.02646300 |
| 0.03116100 | 0.03114100 | 0.03134900 | 0.03161400 | 0.03170000 | 0.03178300 | 0.03212100 | 0.03257900 | 0.03281500 | 0.03272100 | 0.03253300 | 0.03248100 | 0.03252300 | 0.03258400 |
| 0.03391100 | 0.03401200 | 0.03424900 | 0.03475600 | 0.03535600 | 0.03571900 | 0.03566700 | 0.03528700 | 0.03491600 | 0.03479300 | 0.03484600 | 0.03499800 | 0.03524400 | 0.03549500 |
| 0.02390100 | 0.02419200 | 0.02452600 | 0.02489900 | 0.02526300 | 0.02546000 | 0.02551900 | 0.02553900 | 0.02548400 | 0.02534300 | 0.02521200 | 0.02509600 | 0.02487700 | 0.02470200 |
| 0.02225200 | 0.02298500 | 0.02308900 | 0.02281200 | 0.02270400 | 0.02291300 | 0.02314700 | 0.02305000 | 0.02265900 | 0.02240700 | 0.02254300 | 0.02280500 | 0.02293500 | 0.02315800 |
| 0.03151200 | 0.03204700 | 0.03244500 | 0.03271400 | 0.03297300 | 0.03324900 | 0.03351700 | 0.03366000 | 0.03360400 | 0.03355000 | 0.03369700 | 0.03391500 | 0.03399500 | 0.03395000 |
| 0.03688900 | 0.03708100 | 0.03727500 | 0.03743200 | 0.03767900 | 0.03801300 | 0.03824200 | 0.03835400 | 0.03853300 | 0.03872300 | 0.03868600 | 0.03837700 | 0.03797800 | 0.03774800 |
| 0.02360500 | 0.02370700 | 0.02408800 | 0.02463100 | 0.02491400 | 0.02480300 | 0.02468900 | 0.02494800 | 0.02545800 | 0.02582900 | 0.02583000 | 0.02549900 | 0.02508600 | 0.02489000 |
| 0.02307100 | 0.02363000 | 0.02400100 | 0.02399800 | 0.02384700 | 0.02386000 | 0.02404300 | 0.02423400 | 0.02439500 | 0.02448900 | 0.02445700 | 0.02442100 | 0.02455100 | 0.02483100 |
| 0.01826000 | 0.01861800 | 0.01893700 | 0.01904300 | 0.01908100 | 0.01927200 | 0.01959100 | 0.01968600 | 0.01937700 | 0.01896500 | 0.01883900 | 0.01909000 | 0.01950500 | 0.01980300 |
| 0.01922200 | 0.01934800 | 0.01952800 | 0.01975800 | 0.02002100 | 0.02038100 | 0.02075700 | 0.02077600 | 0.02035400 | 0.01992900 | 0.01979400 | 0.01984500 | 0.02001000 | 0.02036700 |
| 0.02207800 | 0.02231300 | 0.02241600 | 0.02235600 | 0.02227400 | 0.02239400 | 0.02256300 | 0.02251400 | 0.02239700 | 0.02252000 | 0.02290800 | 0.02328600 | 0.02343000 | 0.02344200 |



| 9397       | 9399       | 9401       | 9403       | 9405       | 9406       | 9408       | 9410       | 9412       | 9414       | 9416       | 9418       | 9420       | 9422       |
|------------|------------|------------|------------|------------|------------|------------|------------|------------|------------|------------|------------|------------|------------|
| 0.02471300 | 0.02504100 | 0.02513400 | 0.02490200 | 0.02471500 | 0.02481100 | 0.02503500 | 0.02519600 | 0.02535000 | 0.02564600 | 0.02605000 | 0.02637900 | 0.02656200 | 0.02669200 |
| 0.01600800 | 0.01636300 | 0.01673000 | 0.01682400 | 0.01667400 | 0.01646200 | 0.01632900 | 0.01643400 | 0.01687700 | 0.01747100 | 0.01796200 | 0.01834300 | 0.01869600 | 0.01896300 |
| 0.03587700 | 0.03607600 | 0.03607100 | 0.03589400 | 0.03574400 | 0.03577200 | 0.03595500 | 0.03623300 | 0.03659100 | 0.03703400 | 0.03761900 | 0.03833900 | 0.03905100 | 0.03961000 |
| 0.03505100 | 0.03517600 | 0.03547400 | 0.03573100 | 0.03582800 | 0.03578500 | 0.03570000 | 0.03558000 | 0.03541600 | 0.03534600 | 0.03551900 | 0.03595000 | 0.03653800 | 0.03708800 |
| 0.02650900 | 0.02621400 | 0.02576100 | 0.02552100 | 0.02570700 | 0.02602700 | 0.02616600 | 0.02624900 | 0.02642300 | 0.02663000 | 0.02691200 | 0.02722100 | 0.02726800 | 0.02706000 |
| 0.03273600 | 0.03297000 | 0.03312000 | 0.03309800 | 0.03297300 | 0.03279700 | 0.03261800 | 0.03265800 | 0.03318200 | 0.03417300 | 0.03528600 | 0.03608200 | 0.03633100 | 0.03619100 |
| 0.03570300 | 0.03587100 | 0.03591400 | 0.03585300 | 0.03578300 | 0.03566700 | 0.03564100 | 0.03597600 | 0.03650000 | 0.03688700 | 0.03726600 | 0.03774800 | 0.03798900 | 0.03785000 |
| 0.02498500 | 0.02566900 | 0.02612700 | 0.02598800 | 0.02556200 | 0.02541200 | 0.02571100 | 0.02614000 | 0.02639700 | 0.02657200 | 0.02688600 | 0.02730900 | 0.02769200 | 0.02805700 |
| 0.02367900 | 0.02413300 | 0.02414300 | 0.02398000 | 0.02408500 | 0.02438300 | 0.02454200 | 0.02452800 | 0.02453500 | 0.02473600 | 0.02520300 | 0.02583000 | 0.02641600 | 0.02685400 |
| 0.03395900 | 0.03413700 | 0.03434100 | 0.03437200 | 0.03422300 | 0.03394100 | 0.03364000 | 0.03360700 | 0.03387000 | 0.03410300 | 0.03424400 | 0.03443300 | 0.03464600 | 0.03495500 |
| 0.03786300 | 0.03827300 | 0.03876200 | 0.03904100 | 0.03894100 | 0.03867600 | 0.03865100 | 0.03897700 | 0.03939400 | 0.03968400 | 0.04004700 | 0.04070000 | 0.04127800 | 0.04140500 |
| 0.02503700 | 0.02541900 | 0.02583800 | 0.02613600 | 0.02620600 | 0.02600500 | 0.02564900 | 0.02545900 | 0.02569400 | 0.02625400 | 0.02685100 | 0.02735100 | 0.02768900 | 0.02780300 |
| 0.02511200 | 0.02522900 | 0.02507800 | 0.02477800 | 0.02466100 | 0.02482900 | 0.02498200 | 0.02502300 | 0.02536200 | 0.02625200 | 0.02727600 | 0.02777500 | 0.02756700 | 0.02712400 |
| 0.01996200 | 0.02013600 | 0.02021900 | 0.02001200 | 0.01959400 | 0.01917300 | 0.01897400 | 0.01914000 | 0.01950900 | 0.01987700 | 0.02019900 | 0.02027800 | 0.01999400 | 0.01982600 |
| 0.02092200 | 0.02146200 | 0.02166600 | 0.02145000 | 0.02108800 | 0.02090100 | 0.02091900 | 0.02094600 | 0.02094400 | 0.02112400 | 0.02156600 | 0.02197600 | 0.02193700 | 0.02153900 |
| 0.02353600 | 0.02371000 | 0.02373700 | 0.02349000 | 0.02323300 | 0.02335300 | 0.02385300 | 0.02434600 | 0.02450800 | 0.02448700 | 0.02460700 | 0.02482900 | 0.02498400 | 0.02514700 |

| 9424       | 9426       | 9428       | 9430       | 9432       | 9433       | 9435       | 9437       | 9439       | 9441       | 9443       | 9445       | 9447       | 9449       |
|------------|------------|------------|------------|------------|------------|------------|------------|------------|------------|------------|------------|------------|------------|
| 0.02686300 | 0.02713500 | 0.02759700 | 0.02828800 | 0.02914200 | 0.03018700 | 0.03142400 | 0.03248000 | 0.03309000 | 0.03368300 | 0.03478300 | 0.03633800 | 0.03804900 | 0.03997500 |
| 0.01912000 | 0.01941000 | 0.02008900 | 0.02098400 | 0.02174600 | 0.02239600 | 0.02316300 | 0.02414900 | 0.02537400 | 0.02678600 | 0.02826200 | 0.02980000 | 0.03153300 | 0.03360100 |
| 0.03996600 | 0.04023600 | 0.04064700 | 0.04128700 | 0.04206300 | 0.04286300 | 0.04364100 | 0.04454200 | 0.04584900 | 0.04755700 | 0.04930800 | 0.05092000 | 0.05260500 | 0.05460700 |
| 0.03742000 | 0.03758800 | 0.03791700 | 0.03863600 | 0.03954900 | 0.04031200 | 0.04098100 | 0.04191400 | 0.04316400 | 0.04443600 | 0.04565300 | 0.04700600 | 0.04856900 | 0.05046100 |
| 0.02697200 | 0.02721900 | 0.02773200 | 0.02841000 | 0.02921500 | 0.03005000 | 0.03079000 | 0.03146200 | 0.03208700 | 0.03260000 | 0.03303300 | 0.03352600 | 0.03427500 | 0.03539300 |
| 0.03597700 | 0.03593700 | 0.03634200 | 0.03725700 | 0.03826200 | 0.03896300 | 0.03946000 | 0.04004400 | 0.04094100 | 0.04222300 | 0.04368500 | 0.04513700 | 0.04678100 | 0.04895600 |
| 0.03783400 | 0.03841200 | 0.03947700 | 0.04067700 | 0.04179600 | 0.04274600 | 0.04346100 | 0.04393200 | 0.04441100 | 0.04533000 | 0.04674000 | 0.04831400 | 0.05000500 | 0.05209200 |
| 0.02848100 | 0.02885300 | 0.02907700 | 0.02937000 | 0.03001000 | 0.03099800 | 0.03214600 | 0.03322100 | 0.03411300 | 0.03494100 | 0.03581400 | 0.03671400 | 0.03773800 | 0.03920000 |
| 0.02721900 | 0.02768800 | 0.02832200 | 0.02901600 | 0.02967500 | 0.03029500 | 0.03093500 | 0.03181800 | 0.03320500 | 0.03500300 | 0.03682200 | 0.03843900 | 0.03993400 | 0.04159200 |
| 0.03551600 | 0.03635100 | 0.03750900 | 0.03886400 | 0.03992600 | 0.04040100 | 0.04064100 | 0.04122400 | 0.04227200 | 0.04347300 | 0.04462000 | 0.04574000 | 0.04692800 | 0.04844400 |
| 0.04142100 | 0.04174400 | 0.04224700 | 0.04266800 | 0.04304600 | 0.04362600 | 0.04458000 | 0.04584500 | 0.04722700 | 0.04852300 | 0.04959200 | 0.05055600 | 0.05172300 | 0.05331800 |
| 0.02792100 | 0.02837600 | 0.02911800 | 0.02991500 | 0.03064900 | 0.03132500 | 0.03209200 | 0.03306800 | 0.03419700 | 0.03544000 | 0.03679600 | 0.03820100 | 0.03960800 | 0.04115300 |
| 0.02706200 | 0.02756000 | 0.02837000 | 0.02924300 | 0.03011400 | 0.03095000 | 0.03169400 | 0.03245500 | 0.03352500 | 0.03495700 | 0.03634800 | 0.03742400 | 0.03856800 | 0.04026400 |
| 0.02028500 | 0.02111500 | 0.02175400 | 0.02214200 | 0.02255600 | 0.02303500 | 0.02341000 | 0.02374500 | 0.02429400 | 0.02506300 | 0.02575300 | 0.02612400 | 0.02635700 | 0.02696300 |
| 0.02135700 | 0.02150100 | 0.02166700 | 0.02199100 | 0.02266700 | 0.02350200 | 0.02438200 | 0.02528700 | 0.02605000 | 0.02662800 | 0.02714000 | 0.02772700 | 0.02858500 | 0.02980700 |
| 0.02540300 | 0.02566400 | 0.02587400 | 0.02621600 | 0.02680100 | 0.02735800 | 0.02778900 | 0.02850100 | 0.02962800 | 0.03076300 | 0.03170500 | 0.03270600 | 0.03401700 | 0.03564100 |

| 9451       | 9453       | 9455       | 9457       | 9459       | 9460       | 9462       | 9464       | 9466       | 9468       | 9470       | 9472       | 9474       | 9476       |
|------------|------------|------------|------------|------------|------------|------------|------------|------------|------------|------------|------------|------------|------------|
| 0.04245800 | 0.04558700 | 0.04908500 | 0.05261800 | 0.05599500 | 0.05914400 | 0.06188900 | 0.06368600 | 0.06390100 | 0.06237800 | 0.05951500 | 0.05604400 | 0.05271400 | 0.04975400 |
| 0.03606000 | 0.03887600 | 0.04199000 | 0.04527900 | 0.04859500 | 0.05185900 | 0.05477800 | 0.05663600 | 0.05683400 | 0.05537300 | 0.05265400 | 0.04925800 | 0.04585000 | 0.04278000 |
| 0.05693300 | 0.05954600 | 0.06259700 | 0.06609900 | 0.06965400 | 0.07277900 | 0.07521600 | 0.07680400 | 0.07729100 | 0.07642500 | 0.07424200 | 0.07120100 | 0.06791600 | 0.06466200 |
| 0.05298200 | 0.05614100 | 0.05957900 | 0.06302700 | 0.06639400 | 0.06959600 | 0.07236200 | 0.07404200 | 0.07408200 | 0.07253800 | 0.06977700 | 0.06631600 | 0.06285200 | 0.05976100 |
| 0.03675100 | 0.03831400 | 0.04015100 | 0.04198500 | 0.04358700 | 0.04519800 | 0.04694200 | 0.04838300 | 0.04892000 | 0.04843600 | 0.04736200 | 0.04597000 | 0.04416800 | 0.04206000 |
| 0.05159800 | 0.05432900 | 0.05706300 | 0.06006400 | 0.06346900 | 0.06699500 | 0.06993300 | 0.07162400 | 0.07198800 | 0.07110400 | 0.06879000 | 0.06525200 | 0.06139500 | 0.05799800 |
| 0.05469600 | 0.05768900 | 0.06089800 | 0.06416100 | 0.06746300 | 0.07083000 | 0.07383800 | 0.07569800 | 0.07593400 | 0.07453000 | 0.07183300 | 0.06845500 | 0.06493000 | 0.06163100 |
| 0.04131600 | 0.04391100 | 0.04669300 | 0.04960100 | 0.05258200 | 0.05538900 | 0.05776800 | 0.05944000 | 0.05998900 | 0.05913800 | 0.05694100 | 0.05374000 | 0.05026600 | 0.04728600 |
| 0.04376100 | 0.04650600 | 0.04964000 | 0.05307400 | 0.05671800 | 0.06019500 | 0.06296100 | 0.06457300 | 0.06477200 | 0.06346800 | 0.06094500 | 0.05786700 | 0.05475600 | 0.05171100 |
| 0.05061100 | 0.05340500 | 0.05647800 | 0.05953600 | 0.06240500 | 0.06495700 | 0.06713200 | 0.06870000 | 0.06909900 | 0.06794400 | 0.06552000 | 0.06248100 | 0.05935500 | 0.05653300 |
| 0.05553100 | 0.05851400 | 0.06214300 | 0.06603500 | 0.06980400 | 0.07317500 | 0.07590500 | 0.07759300 | 0.07769500 | 0.07595200 | 0.07282800 | 0.06929900 | 0.06604200 | 0.06306500 |
| 0.04318000 | 0.04597700 | 0.04941600 | 0.05299300 | 0.05633900 | 0.05946000 | 0.06220100 | 0.06387900 | 0.06385100 | 0.06219500 | 0.05953300 | 0.05648900 | 0.05350100 | 0.05076100 |
| 0.04236900 | 0.04457800 | 0.04707500 | 0.05003000 | 0.05314600 | 0.05619400 | 0.05910500 | 0.06132100 | 0.06194000 | 0.06063400 | 0.05793200 | 0.05469500 | 0.05150300 | 0.04850500 |
| 0.02816400 | 0.02968900 | 0.03130900 | 0.03300700 | 0.03474500 | 0.03648300 | 0.03797700 | 0.03869400 | 0.03851400 | 0.03786100 | 0.03687100 | 0.03538000 | 0.03365900 | 0.03215900 |
| 0.03126600 | 0.03280700 | 0.03446000 | 0.03627300 | 0.03804200 | 0.03956400 | 0.04084500 | 0.04172000 | 0.04191400 | 0.04143300 | 0.04035000 | 0.03874000 | 0.03692200 | 0.03528100 |
| 0.03736600 | 0.03905100 | 0.04093600 | 0.04324900 | 0.04572800 | 0.04796200 | 0.04974600 | 0.05085300 | 0.05101500 | 0.05025200 | 0.04884100 | 0.04693000 | 0.04452700 | 0.04195600 |

| 9478       | 9480       | 9482       | 9484       | 9486       | 9487       | 9489       | 9491       | 9493       | 9495       | 9497       | 9499       | 9501       | 9503       |
|------------|------------|------------|------------|------------|------------|------------|------------|------------|------------|------------|------------|------------|------------|
| 0.04691000 | 0.04419100 | 0.04197700 | 0.04024000 | 0.03850400 | 0.03674100 | 0.03533900 | 0.03430900 | 0.03339300 | 0.03250300 | 0.03166200 | 0.03098400 | 0.03063100 | 0.03048200 |
| 0.03996800 | 0.03737400 | 0.03517500 | 0.03331800 | 0.03150400 | 0.02977100 | 0.02836600 | 0.02717400 | 0.02595900 | 0.02478400 | 0.02377000 | 0.02293900 | 0.02241700 | 0.02227700 |
| 0.06141400 | 0.05834700 | 0.05577500 | 0.05375800 | 0.05212700 | 0.05074500 | 0.04953500 | 0.04841300 | 0.04735300 | 0.04633600 | 0.04533400 | 0.04456000 | 0.04420700 | 0.04389000 |
| 0.05689500 | 0.05416400 | 0.05182400 | 0.04995900 | 0.04830800 | 0.04687200 | 0.04593500 | 0.04539200 | 0.04481100 | 0.04398700 | 0.04300100 | 0.04208700 | 0.04152700 | 0.04126700 |
| 0.04001900 | 0.03829800 | 0.03700400 | 0.03604400 | 0.03507700 | 0.03398500 | 0.03312600 | 0.03270900 | 0.03238500 | 0.03180900 | 0.03116100 | 0.03075600 | 0.03049400 | 0.02999100 |
| 0.05514700 | 0.05263200 | 0.05047900 | 0.04873600 | 0.04719600 | 0.04569500 | 0.04429400 | 0.04315800 | 0.04235000 | 0.04169400 | 0.04101300 | 0.04031600 | 0.03958700 | 0.03877600 |
| 0.05879100 | 0.05632100 | 0.05405500 | 0.05204600 | 0.05039000 | 0.04906200 | 0.04796600 | 0.04701700 | 0.04616300 | 0.04528300 | 0.04430200 | 0.04335700 | 0.04265400 | 0.04216900 |
| 0.04493500 | 0.04297200 | 0.04143800 | 0.04029800 | 0.03907500 | 0.03754600 | 0.03612900 | 0.03513400 | 0.03432600 | 0.03338600 | 0.03234200 | 0.03150500 | 0.03109000 | 0.03088400 |
| 0.04871200 | 0.04583600 | 0.04323900 | 0.04101100 | 0.03910100 | 0.03746900 | 0.03617900 | 0.03518600 | 0.03423800 | 0.03314300 | 0.03214200 | 0.03165100 | 0.03153800 | 0.03122600 |
| 0.05423200 | 0.05225300 | 0.05031100 | 0.04848200 | 0.04690500 | 0.04547600 | 0.04412400 | 0.04300000 | 0.04219000 | 0.04156200 | 0.04105900 | 0.04072100 | 0.04045800 | 0.04011800 |
| 0.06021200 | 0.05765300 | 0.05570100 | 0.05422500 | 0.05268300 | 0.05096700 | 0.04953100 | 0.04861000 | 0.04796000 | 0.04720100 | 0.04617300 | 0.04515100 | 0.04451100 | 0.04418300 |
| 0.04815900 | 0.04562000 | 0.04345200 | 0.04185800 | 0.04037100 | 0.03846600 | 0.03637800 | 0.03472400 | 0.03378400 | 0.03335900 | 0.03304900 | 0.03260400 | 0.03202800 | 0.03138900 |
| 0.04581600 | 0.04365800 | 0.04204600 | 0.04065900 | 0.03913200 | 0.03750800 | 0.03614700 | 0.03504700 | 0.03393700 | 0.03288200 | 0.03206200 | 0.03150300 | 0.03128400 | 0.03124500 |
| 0.03085400 | 0.02961600 | 0.02867800 | 0.02803200 | 0.02721100 | 0.02611800 | 0.02517600 | 0.02458900 | 0.02419600 | 0.02382400 | 0.02339400 | 0.02295100 | 0.02271700 | 0.02275700 |
| 0.03396100 | 0.03276800 | 0.03148200 | 0.03021000 | 0.02907900 | 0.02794300 | 0.02673500 | 0.02569000 | 0.02511600 | 0.02505000 | 0.02510700 | 0.02491300 | 0.02459100 | 0.02434100 |
| 0.03979100 | 0.03821900 | 0.03703100 | 0.03596200 | 0.03473600 | 0.03326600 | 0.03182000 | 0.03071800 | 0.03003100 | 0.02958400 | 0.02913100 | 0.02862800 | 0.02826700 | 0.02817600 |

| 9505       | 9507       | 9509       | 9511       | 9513       | 9514       | 9516       | 9518       | 9520       | 9522       | 9524       | 9526       | 9528       | 9530       |
|------------|------------|------------|------------|------------|------------|------------|------------|------------|------------|------------|------------|------------|------------|
| 0.03015800 | 0.02958800 | 0.02913000 | 0.02894600 | 0.02878700 | 0.02838100 | 0.02770300 | 0.02710200 | 0.02696100 | 0.02711100 | 0.02714100 | 0.02701500 | 0.02685600 | 0.02664100 |
| 0.02229800 | 0.02217100 | 0.02179700 | 0.02131400 | 0.02090900 | 0.02059800 | 0.02027900 | 0.01997900 | 0.01983700 | 0.01987300 | 0.01996100 | 0.01994000 | 0.01976600 | 0.01950400 |
| 0.04313800 | 0.04220500 | 0.04164700 | 0.04154100 | 0.04156600 | 0.04131900 | 0.04057600 | 0.03968200 | 0.03928200 | 0.03943700 | 0.03968700 | 0.03976000 | 0.03953500 | 0.03904100 |
| 0.04087400 | 0.04021100 | 0.03962700 | 0.03936200 | 0.03931700 | 0.03929900 | 0.03911300 | 0.03870100 | 0.03834500 | 0.03829900 | 0.03825900 | 0.03780800 | 0.03715600 | 0.03679700 |
| 0.02913900 | 0.02841500 | 0.02838100 | 0.02882300 | 0.02901600 | 0.02870900 | 0.02824500 | 0.02804500 | 0.02827700 | 0.02872700 | 0.02896000 | 0.02877300 | 0.02836000 | 0.02791200 |
| 0.03798400 | 0.03749600 | 0.03751600 | 0.03768600 | 0.03739100 | 0.03663100 | 0.03592700 | 0.03566400 | 0.03595900 | 0.03660000 | 0.03710300 | 0.03719500 | 0.03692600 | 0.03638700 |
| 0.04165600 | 0.04107300 | 0.04055400 | 0.04004000 | 0.03947100 | 0.03894900 | 0.03855500 | 0.03851200 | 0.03895900 | 0.03939700 | 0.03930200 | 0.03896300 | 0.03888800 | 0.03901100 |
| 0.03043500 | 0.02962100 | 0.02884700 | 0.02852200 | 0.02851600 | 0.02840700 | 0.02811600 | 0.02799500 | 0.02827000 | 0.02866800 | 0.02877700 | 0.02860900 | 0.02842700 | 0.02829800 |
| 0.03055400 | 0.02990400 | 0.02945100 | 0.02891100 | 0.02824400 | 0.02781600 | 0.02764800 | 0.02743400 | 0.02726600 | 0.02739800 | 0.02765300 | 0.02770200 | 0.02750900 | 0.02726600 |
| 0.03959100 | 0.03891100 | 0.03834800 | 0.03801400 | 0.03770300 | 0.03729900 | 0.03685400 | 0.03641800 | 0.03620600 | 0.03636700 | 0.03661600 | 0.03670500 | 0.03669800 | 0.03653100 |
| 0.04380900 | 0.04339900 | 0.04330400 | 0.04353700 | 0.04359300 | 0.04302200 | 0.04208000 | 0.04151400 | 0.04161300 | 0.04192300 | 0.04188100 | 0.04140700 | 0.04090300 | 0.04067600 |
| 0.03067300 | 0.02991200 | 0.02935900 | 0.02921100 | 0.02924900 | 0.02912900 | 0.02884700 | 0.02864400 | 0.02863600 | 0.02874800 | 0.02878700 | 0.02859600 | 0.02825200 | 0.02797600 |
| 0.03088600 | 0.03024900 | 0.02994800 | 0.03000100 | 0.02979800 | 0.02913300 | 0.02839400 | 0.02805200 | 0.02816600 | 0.02831600 | 0.02824100 | 0.02818500 | 0.02827700 | 0.02821600 |
| 0.02270300 | 0.02234300 | 0.02199900 | 0.02185800 | 0.02160800 | 0.02102100 | 0.02048200 | 0.02045300 | 0.02062900 | 0.02056000 | 0.02054200 | 0.02082000 | 0.02096000 | 0.02068200 |
| 0.02400400 | 0.02359800 | 0.02343700 | 0.02343900 | 0.02326400 | 0.02294600 | 0.02280300 | 0.02296400 | 0.02321400 | 0.02328500 | 0.02308400 | 0.02264700 | 0.02211600 | 0.02172600 |
| 0.02808100 | 0.02757900 | 0.02686500 | 0.02653700 | 0.02659700 | 0.02655600 | 0.02631400 | 0.02608600 | 0.02598100 | 0.02604700 | 0.02622500 | 0.02633800 | 0.02635400 | 0.02634100 |

| 9532       | 9534       | 9536       | 9538       | 9540       | 9541       | 9543       | 9545       | 9547       | 9549       | 9551       | 9553       | 9555       | 9557       |
|------------|------------|------------|------------|------------|------------|------------|------------|------------|------------|------------|------------|------------|------------|
| 0.02638800 | 0.02619500 | 0.02612200 | 0.02623200 | 0.02647900 | 0.02664000 | 0.02660300 | 0.02647600 | 0.02641500 | 0.02653900 | 0.02675100 | 0.02678500 | 0.02671800 | 0.02683700 |
| 0.01912800 | 0.01869300 | 0.01851100 | 0.01871900 | 0.01898700 | 0.01897800 | 0.01872600 | 0.01842100 | 0.01817200 | 0.01808100 | 0.01819300 | 0.01838200 | 0.01849900 | 0.01860500 |
| 0.03880700 | 0.03915100 | 0.03957300 | 0.03958200 | 0.03930300 | 0.03908300 | 0.03914100 | 0.03940800 | 0.03957700 | 0.03958400 | 0.03966300 | 0.03980600 | 0.03984600 | 0.03991100 |
| 0.03680600 | 0.03693800 | 0.03704500 | 0.03708900 | 0.03703900 | 0.03704700 | 0.03728100 | 0.03745800 | 0.03723800 | 0.03691000 | 0.03684600 | 0.03690200 | 0.03700400 | 0.03737000 |
| 0.02752900 | 0.02745500 | 0.02773100 | 0.02801100 | 0.02803800 | 0.02780800 | 0.02744500 | 0.02720900 | 0.02721200 | 0.02728100 | 0.02730800 | 0.02731100 | 0.02729800 | 0.02734400 |
| 0.03571000 | 0.03511600 | 0.03481300 | 0.03493000 | 0.03538500 | 0.03591900 | 0.03626400 | 0.03619000 | 0.03571600 | 0.03519800 | 0.03487500 | 0.03467800 | 0.03457100 | 0.03463000 |
| 0.03898700 | 0.03873300 | 0.03846800 | 0.03847400 | 0.03876200 | 0.03908000 | 0.03927800 | 0.03937500 | 0.03936400 | 0.03925900 | 0.03915300 | 0.03902200 | 0.03875700 | 0.03847300 |
| 0.02816400 | 0.02799600 | 0.02780700 | 0.02771900 | 0.02781800 | 0.02796200 | 0.02790400 | 0.02763900 | 0.02749800 | 0.02769000 | 0.02799900 | 0.02816300 | 0.02814300 | 0.02795300 |
| 0.02715000 | 0.02719500 | 0.02738000 | 0.02773000 | 0.02803900 | 0.02784300 | 0.02708700 | 0.02644500 | 0.02647800 | 0.02687300 | 0.02699700 | 0.02673600 | 0.02649400 | 0.02667800 |
| 0.03614700 | 0.03587800 | 0.03605700 | 0.03661300 | 0.03711800 | 0.03710400 | 0.03663300 | 0.03621400 | 0.03603900 | 0.03597300 | 0.03600800 | 0.03616900 | 0.03634000 | 0.03637900 |
| 0.04055400 | 0.04030000 | 0.04009900 | 0.04029400 | 0.04077000 | 0.04101400 | 0.04087100 | 0.04072000 | 0.04079500 | 0.04096400 | 0.04114900 | 0.04132600 | 0.04130800 | 0.04100200 |
| 0.02790200 | 0.02802000 | 0.02826400 | 0.02861100 | 0.02894900 | 0.02897400 | 0.02859800 | 0.02822800 | 0.02831800 | 0.02874300 | 0.02888700 | 0.02843800 | 0.02772300 | 0.02721400 |
| 0.02785100 | 0.02753900 | 0.02771900 | 0.02826600 | 0.02862800 | 0.02862700 | 0.02856700 | 0.02856700 | 0.02844200 | 0.02813600 | 0.02774700 | 0.02730400 | 0.02685800 | 0.02663100 |
| 0.02024900 | 0.01995300 | 0.01998700 | 0.02040800 | 0.02089000 | 0.02104600 | 0.02084600 | 0.02057500 | 0.02058800 | 0.02092200 | 0.02117200 | 0.02098900 | 0.02052600 | 0.02018300 |
| 0.02159400 | 0.02166300 | 0.02188200 | 0.02214300 | 0.02222700 | 0.02216900 | 0.02218400 | 0.02213500 | 0.02185700 | 0.02157900 | 0.02147800 | 0.02147800 | 0.02158400 | 0.02188500 |
| 0.02614600 | 0.02561900 | 0.02513600 | 0.02514400 | 0.02541900 | 0.02558100 | 0.02564000 | 0.02564100 | 0.02564000 | 0.02579400 | 0.02594000 | 0.02566400 | 0.02505300 | 0.02474900 |

| 9559       | 9561       | 9563       | 9565       | 9567       | 9568       | 9570       | 9572       | 9574       | 9576       | 9578       | 9580       | 9582       | 9584       |
|------------|------------|------------|------------|------------|------------|------------|------------|------------|------------|------------|------------|------------|------------|
| 0.02703900 | 0.02705100 | 0.02689600 | 0.02675300 | 0.02674500 | 0.02688400 | 0.02699500 | 0.02684700 | 0.02651000 | 0.02633700 | 0.02643000 | 0.02648700 | 0.02634700 | 0.02621500 |
| 0.01881300 | 0.01901700 | 0.01906500 | 0.01896700 | 0.01881900 | 0.01877800 | 0.01894600 | 0.01915500 | 0.01914100 | 0.01890300 | 0.01864400 | 0.01851100 | 0.01849600 | 0.01846600 |
| 0.04004200 | 0.03998400 | 0.03964000 | 0.03919500 | 0.03900000 | 0.03934800 | 0.03996100 | 0.04016200 | 0.03974300 | 0.03917400 | 0.03897200 | 0.03913400 | 0.03919900 | 0.03887400 |
| 0.03785400 | 0.03805400 | 0.03794800 | 0.03779700 | 0.03768600 | 0.03751700 | 0.03726100 | 0.03708900 | 0.03716700 | 0.03735700 | 0.03749300 | 0.03771800 | 0.03798900 | 0.03797800 |
| 0.02755100 | 0.02778700 | 0.02776200 | 0.02742400 | 0.02705700 | 0.02697000 | 0.02726300 | 0.02771800 | 0.02793700 | 0.02768600 | 0.02711700 | 0.02663100 | 0.02644600 | 0.02641600 |
| 0.03487700 | 0.03517400 | 0.03531700 | 0.03528200 | 0.03519800 | 0.03516500 | 0.03520200 | 0.03519100 | 0.03507300 | 0.03495800 | 0.03491900 | 0.03502300 | 0.03527100 | 0.03539500 |
| 0.03829300 | 0.03798300 | 0.03742500 | 0.03709200 | 0.03742300 | 0.03805400 | 0.03838200 | 0.03849300 | 0.03866100 | 0.03862400 | 0.03821000 | 0.03784600 | 0.03789900 | 0.03821100 |
| 0.02762000 | 0.02731100 | 0.02714100 | 0.02711600 | 0.02736800 | 0.02787300 | 0.02832100 | 0.02861800 | 0.02875100 | 0.02843800 | 0.02776000 | 0.02728700 | 0.02716800 | 0.02707600 |
| 0.02712400 | 0.02717100 | 0.02658700 | 0.02592400 | 0.02571600 | 0.02590400 | 0.02618800 | 0.02648500 | 0.02680600 | 0.02699500 | 0.02694600 | 0.02685500 | 0.02691700 | 0.02698600 |
| 0.03627000 | 0.03609900 | 0.03586900 | 0.03559800 | 0.03553400 | 0.03579900 | 0.03607100 | 0.03597300 | 0.03558100 | 0.03538800 | 0.03571800 | 0.03624200 | 0.03641800 | 0.03624200 |
| 0.04065100 | 0.04058600 | 0.04085700 | 0.04117100 | 0.04125900 | 0.04115000 | 0.04098200 | 0.04082500 | 0.04074000 | 0.04073900 | 0.04075600 | 0.04079100 | 0.04090000 | 0.04101200 |
| 0.02709400 | 0.02722500 | 0.02740700 | 0.02763200 | 0.02794100 | 0.02825500 | 0.02851500 | 0.02865300 | 0.02852300 | 0.02815900 | 0.02793500 | 0.02810800 | 0.02834300 | 0.02826400 |
| 0.02684200 | 0.02738100 | 0.02780600 | 0.02783700 | 0.02774900 | 0.02791100 | 0.02816700 | 0.02820100 | 0.02798600 | 0.02759100 | 0.02720800 | 0.02706900 | 0.02706300 | 0.02699500 |
| 0.02013000 | 0.02032500 | 0.02061800 | 0.02067500 | 0.02035600 | 0.02002100 | 0.02002400 | 0.02025200 | 0.02038200 | 0.02026300 | 0.02000900 | 0.01989000 | 0.01998900 | 0.02011600 |
| 0.02226800 | 0.02242300 | 0.02224400 | 0.02198500 | 0.02187800 | 0.02189500 | 0.02196500 | 0.02201500 | 0.02184500 | 0.02146000 | 0.02126500 | 0.02146400 | 0.02176200 | 0.02188600 |
| 0.02502700 | 0.02545600 | 0.02564300 | 0.02564900 | 0.02564100 | 0.02564400 | 0.02562600 | 0.02561200 | 0.02559900 | 0.02545200 | 0.02515800 | 0.02496200 | 0.02493600 | 0.02487000 |

| 9586       | 9588       | 9590       | 9592       | 9594       | 9595       | 9597       | 9599       | 9601       | 9603       | 9605       | 9607       | 9609       | 9611       |
|------------|------------|------------|------------|------------|------------|------------|------------|------------|------------|------------|------------|------------|------------|
| 0.02627200 | 0.02645200 | 0.02656000 | 0.02651300 | 0.02638800 | 0.02625000 | 0.02620700 | 0.02650100 | 0.02708700 | 0.02747800 | 0.02730000 | 0.02669400 | 0.02607400 | 0.02568900 |
| 0.01832600 | 0.01818000 | 0.01814000 | 0.01810500 | 0.01799700 | 0.01788200 | 0.01785100 | 0.01801500 | 0.01832300 | 0.01848900 | 0.01856000 | 0.01887300 | 0.01922800 | 0.01911600 |
| 0.03841700 | 0.03824100 | 0.03839800 | 0.03866700 | 0.03890900 | 0.03910100 | 0.03922800 | 0.03935500 | 0.03964900 | 0.04004700 | 0.04019400 | 0.03996300 | 0.03955000 | 0.03903400 |
| 0.03780200 | 0.03777200 | 0.03779600 | 0.03780900 | 0.03785300 | 0.03781600 | 0.03779000 | 0.03794800 | 0.03808000 | 0.03798900 | 0.03788500 | 0.03795300 | 0.03801200 | 0.03778600 |
| 0.02636100 | 0.02637100 | 0.02672500 | 0.02745400 | 0.02805600 | 0.02807800 | 0.02776200 | 0.02761200 | 0.02768600 | 0.02777200 | 0.02792900 | 0.02828700 | 0.02857800 | 0.02846100 |
| 0.03516000 | 0.03472600 | 0.03455500 | 0.03486900 | 0.03528600 | 0.03546400 | 0.03562500 | 0.03596300 | 0.03615000 | 0.03581800 | 0.03528500 | 0.03518900 | 0.03544200 | 0.03542300 |
| 0.03835000 | 0.03805600 | 0.03763700 | 0.03769200 | 0.03828800 | 0.03891100 | 0.03918900 | 0.03913700 | 0.03888600 | 0.03863900 | 0.03859000 | 0.03877200 | 0.03905000 | 0.03908100 |
| 0.02689000 | 0.02677200 | 0.02693000 | 0.02741000 | 0.02789000 | 0.02799600 | 0.02779400 | 0.02753500 | 0.02725100 | 0.02701900 | 0.02711700 | 0.02760400 | 0.02812400 | 0.02831000 |
| 0.02684700 | 0.02655200 | 0.02627900 | 0.02612600 | 0.02610400 | 0.02620800 | 0.02636900 | 0.02644600 | 0.02647000 | 0.02658400 | 0.02670700 | 0.02671000 | 0.02659400 | 0.02630800 |
| 0.03608800 | 0.03611200 | 0.03626300 | 0.03648400 | 0.03661500 | 0.03648500 | 0.03624400 | 0.03616100 | 0.03613300 | 0.03601800 | 0.03606300 | 0.03637300 | 0.03666600 | 0.03678200 |
| 0.04101000 | 0.04100700 | 0.04120000 | 0.04152900 | 0.04180100 | 0.04191600 | 0.04180300 | 0.04149400 | 0.04123100 | 0.04123100 | 0.04143000 | 0.04155300 | 0.04148200 | 0.04138200 |
| 0.02808300 | 0.02798700 | 0.02779200 | 0.02752100 | 0.02746500 | 0.02768400 | 0.02791200 | 0.02793500 | 0.02788700 | 0.02795600 | 0.02810600 | 0.02834400 | 0.02871900 | 0.02895400 |
| 0.02695800 | 0.02713600 | 0.02755400 | 0.02796900 | 0.02804300 | 0.02791000 | 0.02803600 | 0.02831400 | 0.02826000 | 0.02799500 | 0.02792500 | 0.02799300 | 0.02801300 | 0.02801800 |
| 0.02023100 | 0.02045700 | 0.02068300 | 0.02068400 | 0.02049200 | 0.02033800 | 0.02036000 | 0.02053400 | 0.02076900 | 0.02086400 | 0.02074300 | 0.02075400 | 0.02113300 | 0.02141200 |
| 0.02179900 | 0.02151800 | 0.02117500 | 0.02102500 | 0.02116600 | 0.02144100 | 0.02169200 | 0.02190800 | 0.02207400 | 0.02213100 | 0.02213100 | 0.02220500 | 0.02225100 | 0.02195700 |
| 0.02480000 | 0.02495100 | 0.02523700 | 0.02540200 | 0.02536300 | 0.02525100 | 0.02526600 | 0.02545300 | 0.02575100 | 0.02615700 | 0.02658400 | 0.02677000 | 0.02648200 | 0.02578000 |



| 9613       | 9615       | 9617       | 9619       | 9621       | 9622       | 9624       | 9626       | 9628       | 9630       | 9632       | 9634       | 9636       | 9638       |
|------------|------------|------------|------------|------------|------------|------------|------------|------------|------------|------------|------------|------------|------------|
| 0.02549400 | 0.02546800 | 0.02567700 | 0.02595400 | 0.02607800 | 0.02615600 | 0.02631000 | 0.02639200 | 0.02634700 | 0.02637200 | 0.02654300 | 0.02676000 | 0.02693200 | 0.02690200 |
| 0.01865700 | 0.01841700 | 0.01851200 | 0.01861000 | 0.01852600 | 0.01831200 | 0.01809000 | 0.01800300 | 0.01805500 | 0.01807900 | 0.01798100 | 0.01797900 | 0.01831400 | 0.01873400 |
| 0.03849200 | 0.03825300 | 0.03840200 | 0.03859900 | 0.03866400 | 0.03875300 | 0.03896400 | 0.03913700 | 0.03904600 | 0.03878600 | 0.03876600 | 0.03914600 | 0.03951300 | 0.03937300 |
| 0.03742200 | 0.03741300 | 0.03781900 | 0.03822500 | 0.03842800 | 0.03832400 | 0.03781800 | 0.03725600 | 0.03699700 | 0.03698700 | 0.03720800 | 0.03771900 | 0.03820500 | 0.03814900 |
| 0.02811800 | 0.02806500 | 0.02836800 | 0.02850600 | 0.02815100 | 0.02751500 | 0.02696300 | 0.02669500 | 0.02666800 | 0.02668000 | 0.02664300 | 0.02671200 | 0.02707400 | 0.02761600 |
| 0.03504000 | 0.03478200 | 0.03485900 | 0.03497000 | 0.03502900 | 0.03531400 | 0.03563500 | 0.03545200 | 0.03490400 | 0.03468300 | 0.03500300 | 0.03539100 | 0.03554000 | 0.03571000 |
| 0.03871600 | 0.03845200 | 0.03865500 | 0.03890400 | 0.03888100 | 0.03888800 | 0.03908900 | 0.03918600 | 0.03882500 | 0.03801900 | 0.03736800 | 0.03748500 | 0.03813800 | 0.03857800 |
| 0.02812000 | 0.02778600 | 0.02763400 | 0.02780100 | 0.02806100 | 0.02808000 | 0.02780300 | 0.02742500 | 0.02715100 | 0.02702600 | 0.02695600 | 0.02696200 | 0.02719100 | 0.02758900 |
| 0.02602400 | 0.02620200 | 0.02678000 | 0.02708500 | 0.02686300 | 0.02650900 | 0.02629700 | 0.02622700 | 0.02639700 | 0.02682200 | 0.02720200 | 0.02734100 | 0.02735400 | 0.02725800 |
| 0.03678200 | 0.03675100 | 0.03674300 | 0.03669800 | 0.03661100 | 0.03661300 | 0.03662100 | 0.03640900 | 0.03605600 | 0.03588100 | 0.03603000 | 0.03639700 | 0.03680500 | 0.03708800 |
| 0.04132900 | 0.04121700 | 0.04110100 | 0.04117900 | 0.04137400 | 0.04136100 | 0.04108100 | 0.04081400 | 0.04077100 | 0.04084400 | 0.04079700 | 0.04071200 | 0.04090900 | 0.04138800 |
| 0.02879000 | 0.02848600 | 0.02837200 | 0.02846000 | 0.02870000 | 0.02892100 | 0.02875900 | 0.02821900 | 0.02777800 | 0.02772800 | 0.02798100 | 0.02843200 | 0.02890400 | 0.02899200 |
| 0.02798900 | 0.02786300 | 0.02768800 | 0.02751200 | 0.02739400 | 0.02737800 | 0.02730000 | 0.02701600 | 0.02673800 | 0.02666100 | 0.02669300 | 0.02688700 | 0.02739900 | 0.02794400 |
| 0.02105900 | 0.02025600 | 0.01958000 | 0.01937900 | 0.01963600 | 0.02004100 | 0.02033100 | 0.02061100 | 0.02100300 | 0.02126000 | 0.02114400 | 0.02083700 | 0.02058900 | 0.02035300 |
| 0.02142200 | 0.02124800 | 0.02161900 | 0.02203300 | 0.02214700 | 0.02213600 | 0.02214300 | 0.02207200 | 0.02197900 | 0.02207100 | 0.02230300 | 0.02246100 | 0.02244700 | 0.02232000 |
| 0.02505800 | 0.02474200 | 0.02495800 | 0.02547400 | 0.02592900 | 0.02607300 | 0.02580200 | 0.02522500 | 0.02479200 | 0.02492100 | 0.02544500 | 0.02589800 | 0.02608900 | 0.02596200 |

| 9640       | 9642       | 9644       | 9646       | 9648       | 9649       | 9651       | 9653       | 9655       | 9657       | 9659       | 9661       | 9663       | 9665       |
|------------|------------|------------|------------|------------|------------|------------|------------|------------|------------|------------|------------|------------|------------|
| 0.02656400 | 0.02612200 | 0.02588200 | 0.02594300 | 0.02615500 | 0.02617200 | 0.02571300 | 0.02496700 | 0.02454400 | 0.02476500 | 0.02531300 | 0.02579700 | 0.02601100 | 0.02578900 |
| 0.01875700 | 0.01838600 | 0.01806700 | 0.01804200 | 0.01823000 | 0.01853800 | 0.01883000 | 0.01889500 | 0.01868800 | 0.01830800 | 0.01792500 | 0.01780200 | 0.01800600 | 0.01822600 |
| 0.03890800 | 0.03873100 | 0.03882400 | 0.03866800 | 0.03835800 | 0.03842400 | 0.03882000 | 0.03906400 | 0.03896400 | 0.03866100 | 0.03839500 | 0.03838900 | 0.03863400 | 0.03885900 |
| 0.03761500 | 0.03727200 | 0.03737200 | 0.03746400 | 0.03722000 | 0.03693500 | 0.03706200 | 0.03750200 | 0.03768500 | 0.03729200 | 0.03660100 | 0.03627100 | 0.03671300 | 0.03747500 |
| 0.02796300 | 0.02790000 | 0.02775700 | 0.02802900 | 0.02849900 | 0.02846600 | 0.02794300 | 0.02754100 | 0.02735900 | 0.02707200 | 0.02667200 | 0.02645800 | 0.02656100 | 0.02674800 |
| 0.03591800 | 0.03577100 | 0.03539300 | 0.03526700 | 0.03531600 | 0.03518000 | 0.03489600 | 0.03468600 | 0.03455500 | 0.03448700 | 0.03469100 | 0.03531900 | 0.03605200 | 0.03626600 |
| 0.03857100 | 0.03843200 | 0.03834100 | 0.03825800 | 0.03824400 | 0.03839600 | 0.03864200 | 0.03872400 | 0.03841700 | 0.03785500 | 0.03751000 | 0.03762100 | 0.03787400 | 0.03799000 |
| 0.02790100 | 0.02796100 | 0.02784900 | 0.02783300 | 0.02797300 | 0.02794800 | 0.02758800 | 0.02716500 | 0.02695300 | 0.02696700 | 0.02715000 | 0.02752900 | 0.02803500 | 0.02832700 |
| 0.02693900 | 0.02658700 | 0.02647800 | 0.02638800 | 0.02602600 | 0.02571700 | 0.02580400 | 0.02610900 | 0.02652300 | 0.02705100 | 0.02731600 | 0.02709000 | 0.02669500 | 0.02635000 |
| 0.03712400 | 0.03694000 | 0.03675900 | 0.03673300 | 0.03663300 | 0.03626000 | 0.03586600 | 0.03575500 | 0.03588500 | 0.03605600 | 0.03623000 | 0.03647500 | 0.03662900 | 0.03634100 |
| 0.04169100 | 0.04146100 | 0.04102500 | 0.04096000 | 0.04123700 | 0.04149900 | 0.04163400 | 0.04160700 | 0.04144400 | 0.04126500 | 0.04097800 | 0.04054400 | 0.04021700 | 0.04004000 |
| 0.02857900 | 0.02807800 | 0.02789800 | 0.02803400 | 0.02818500 | 0.02805700 | 0.02764800 | 0.02727300 | 0.02724300 | 0.02746600 | 0.02756000 | 0.02743500 | 0.02724300 | 0.02697600 |
| 0.02804200 | 0.02765900 | 0.02716600 | 0.02689700 | 0.02692600 | 0.02714200 | 0.02740900 | 0.02759600 | 0.02755000 | 0.02727200 | 0.02708800 | 0.02735600 | 0.02786300 | 0.02799600 |
| 0.02013400 | 0.02020000 | 0.02063000 | 0.02110700 | 0.02125100 | 0.02101400 | 0.02071000 | 0.02058300 | 0.02057100 | 0.02054800 | 0.02047800 | 0.02043600 | 0.02045600 | 0.02030200 |
| 0.02221800 | 0.02213900 | 0.02200900 | 0.02200500 | 0.02228000 | 0.02259700 | 0.02266800 | 0.02253000 | 0.02234400 | 0.02218100 | 0.02211800 | 0.02211200 | 0.02180700 | 0.02119600 |
| 0.02559200 | 0.02532700 | 0.02522800 | 0.02505300 | 0.02488500 | 0.02485200 | 0.02482100 | 0.02481100 | 0.02491500 | 0.02500600 | 0.02498700 | 0.02499700 | 0.02509100 | 0.02504400 |

| 9667       | 9669       | 9671       | 9673       | 9675       | 9676       | 9678       | 9680       | 9682       | 9684       | 9686       | 9688       | 9690       | 9692       |
|------------|------------|------------|------------|------------|------------|------------|------------|------------|------------|------------|------------|------------|------------|
| 0.02529800 | 0.02506900 | 0.02539400 | 0.02599500 | 0.02625400 | 0.02587600 | 0.02526800 | 0.02490000 | 0.02472700 | 0.02453600 | 0.02429200 | 0.02403900 | 0.02384500 | 0.02381300 |
| 0.01813700 | 0.01774200 | 0.01736500 | 0.01729600 | 0.01738500 | 0.01729700 | 0.01706000 | 0.01688600 | 0.01676600 | 0.01653000 | 0.01618300 | 0.01602300 | 0.01616000 | 0.01626000 |
| 0.03897600 | 0.03912000 | 0.03922200 | 0.03914500 | 0.03889200 | 0.03845900 | 0.03798600 | 0.03772800 | 0.03758900 | 0.03727300 | 0.03682500 | 0.03645300 | 0.03613700 | 0.03594700 |
| 0.03780200 | 0.03761800 | 0.03733800 | 0.03721600 | 0.03710000 | 0.03666100 | 0.03608100 | 0.03595700 | 0.03628000 | 0.03643300 | 0.03616600 | 0.03576000 | 0.03544700 | 0.03538800 |
| 0.02678500 | 0.02682900 | 0.02718700 | 0.02775200 | 0.02801600 | 0.02774800 | 0.02722900 | 0.02674700 | 0.02642900 | 0.02641300 | 0.02657800 | 0.02658500 | 0.02650300 | 0.02670200 |
| 0.03571700 | 0.03486600 | 0.03443300 | 0.03458400 | 0.03472600 | 0.03436300 | 0.03373200 | 0.03335600 | 0.03344800 | 0.03370300 | 0.03364200 | 0.03332900 | 0.03327400 | 0.03358600 |
| 0.03813700 | 0.03846900 | 0.03882300 | 0.03892800 | 0.03863700 | 0.03810500 | 0.03765700 | 0.03742700 | 0.03726400 | 0.03696400 | 0.03657400 | 0.03631700 | 0.03632200 | 0.03662600 |
| 0.02816000 | 0.02771400 | 0.02726800 | 0.02692900 | 0.02663000 | 0.02620000 | 0.02574000 | 0.02579700 | 0.02655300 | 0.02726000 | 0.02719100 | 0.02654900 | 0.02600700 | 0.02586400 |
| 0.02598300 | 0.02562500 | 0.02544300 | 0.02557400 | 0.02580800 | 0.02566200 | 0.02520500 | 0.02508800 | 0.02543100 | 0.02563300 | 0.02536800 | 0.02485600 | 0.02434200 | 0.02402100 |
| 0.03554800 | 0.03482000 | 0.03490200 | 0.03563200 | 0.03603200 | 0.03569300 | 0.03525300 | 0.03552600 | 0.03643000 | 0.03698200 | 0.03664800 | 0.03593900 | 0.03544300 | 0.03521700 |
| 0.03982400 | 0.03964100 | 0.03978300 | 0.04033500 | 0.04092500 | 0.04101700 | 0.04045800 | 0.03959600 | 0.03888900 | 0.03846300 | 0.03822500 | 0.03822200 | 0.03848400 | 0.03884700 |
| 0.02671900 | 0.02678500 | 0.02729500 | 0.02792800 | 0.02805100 | 0.02736700 | 0.02635200 | 0.02571900 | 0.02569800 | 0.02589200 | 0.02580200 | 0.02553800 | 0.02550000 | 0.02566000 |
| 0.02762300 | 0.02713900 | 0.02679700 | 0.02670300 | 0.02684900 | 0.02677800 | 0.02615600 | 0.02553200 | 0.02558400 | 0.02609700 | 0.02639600 | 0.02626000 | 0.02595500 | 0.02584800 |
| 0.01984900 | 0.01954500 | 0.01995000 | 0.02093200 | 0.02164400 | 0.02146700 | 0.02064300 | 0.01983100 | 0.01944700 | 0.01938200 | 0.01920600 | 0.01868800 | 0.01811600 | 0.01802000 |
| 0.02093600 | 0.02122700 | 0.02156900 | 0.02182300 | 0.02207000 | 0.02203700 | 0.02168600 | 0.02141500 | 0.02138900 | 0.02138600 | 0.02109200 | 0.02054700 | 0.02032600 | 0.02076400 |
| 0.02480400 | 0.02466500 | 0.02486600 | 0.02540900 | 0.02590200 | 0.02568600 | 0.02479300 | 0.02411900 | 0.02410100 | 0.02416300 | 0.02382800 | 0.02351000 | 0.02373000 | 0.02427300 |

| 9694       | 9696       | 9698       | 9700       | 9702       | 9703       | 9705       | 9707       | 9709       | 9711       | 9713       | 9715       | 9717       | 9719       |
|------------|------------|------------|------------|------------|------------|------------|------------|------------|------------|------------|------------|------------|------------|
| 0.02395400 | 0.02413300 | 0.02420600 | 0.02409600 | 0.02388800 | 0.02383200 | 0.02390400 | 0.02378500 | 0.02341300 | 0.02295800 | 0.02259600 | 0.02243600 | 0.02231700 | 0.02210900 |
| 0.01617500 | 0.01620000 | 0.01645100 | 0.01666900 | 0.01669800 | 0.01665000 | 0.01653800 | 0.01615500 | 0.01553700 | 0.01510200 | 0.01493000 | 0.01459200 | 0.01392000 | 0.01320600 |
| 0.03615400 | 0.03666500 | 0.03703800 | 0.03702600 | 0.03673900 | 0.03652600 | 0.03654900 | 0.03642000 | 0.03576000 | 0.03492700 | 0.03459000 | 0.03471000 | 0.03459600 | 0.03408800 |
| 0.03582100 | 0.03648700 | 0.03667700 | 0.03627700 | 0.03571300 | 0.03513600 | 0.03456600 | 0.03419500 | 0.03408200 | 0.03399200 | 0.03374200 | 0.03344700 | 0.03327600 | 0.03319500 |
| 0.02714100 | 0.02745600 | 0.02749900 | 0.02726400 | 0.02675700 | 0.02617400 | 0.02571500 | 0.02536000 | 0.02507900 | 0.02492900 | 0.02497700 | 0.02514800 | 0.02513000 | 0.02478300 |
| 0.03391700 | 0.03404600 | 0.03399700 | 0.03379300 | 0.03347200 | 0.03316800 | 0.03289600 | 0.03255400 | 0.03221000 | 0.03199600 | 0.03189000 | 0.03173500 | 0.03138300 | 0.03098400 |
| 0.03706600 | 0.03722700 | 0.03690700 | 0.03630100 | 0.03573000 | 0.03546900 | 0.03545600 | 0.03526200 | 0.03481800 | 0.03460000 | 0.03483000 | 0.03511900 | 0.03502800 | 0.03463100 |
| 0.02580900 | 0.02561400 | 0.02561300 | 0.02588900 | 0.02600600 | 0.02589600 | 0.02573500 | 0.02538300 | 0.02487000 | 0.02458300 | 0.02460500 | 0.02449200 | 0.02395300 | 0.02339900 |
| 0.02410600 | 0.02448400 | 0.02479500 | 0.02487100 | 0.02472900 | 0.02451100 | 0.02434100 | 0.02403000 | 0.02337000 | 0.02252300 | 0.02187500 | 0.02163300 | 0.02158200 | 0.02152000 |
| 0.03503900 | 0.03481000 | 0.03476600 | 0.03499200 | 0.03511300 | 0.03492600 | 0.03450100 | 0.03382500 | 0.03310800 | 0.03280000 | 0.03302400 | 0.03337900 | 0.03333300 | 0.03288700 |
| 0.03915000 | 0.03933300 | 0.03942900 | 0.03952500 | 0.03957200 | 0.03942600 | 0.03912100 | 0.03886200 | 0.03869300 | 0.03847400 | 0.03820400 | 0.03798300 | 0.03775100 | 0.03746600 |
| 0.02587700 | 0.02627800 | 0.02682400 | 0.02704100 | 0.02650600 | 0.02552600 | 0.02485000 | 0.02463200 | 0.02448100 | 0.02438700 | 0.02468200 | 0.02521000 | 0.02541800 | 0.02515800 |
| 0.02611000 | 0.02649200 | 0.02663300 | 0.02646900 | 0.02609400 | 0.02564400 | 0.02526600 | 0.02488300 | 0.02433200 | 0.02378300 | 0.02354400 | 0.02356500 | 0.02347100 | 0.02308100 |
| 0.01854100 | 0.01930800 | 0.01986700 | 0.01996700 | 0.01973200 | 0.01954700 | 0.01953400 | 0.01943700 | 0.01910600 | 0.01876200 | 0.01864400 | 0.01856200 | 0.01818200 | 0.01771200 |
| 0.02136600 | 0.02150900 | 0.02117500 | 0.02075300 | 0.02053900 | 0.02052100 | 0.02055800 | 0.02056000 | 0.02042700 | 0.02019700 | 0.02013100 | 0.02032700 | 0.02054000 | 0.02043700 |
| 0.02469100 | 0.02488300 | 0.02476200 | 0.02422900 | 0.02352000 | 0.02297100 | 0.02273700 | 0.02279900 | 0.02288900 | 0.02278600 | 0.02272800 | 0.02287600 | 0.02282400 | 0.02243200 |

| 9721       | 9723       | 9725       | 9727       | 9729       | 9730       | 9732       | 9734       | 9736       | 9738       | 9740       | 9742       | 9744       | 9746       |
|------------|------------|------------|------------|------------|------------|------------|------------|------------|------------|------------|------------|------------|------------|
| 0.02202800 | 0.02213900 | 0.02223900 | 0.02231000 | 0.02241100 | 0.02240100 | 0.02219900 | 0.02203700 | 0.02214000 | 0.02231600 | 0.02225700 | 0.02206700 | 0.02199300 | 0.02197300 |
| 0.01281300 | 0.01295800 | 0.01345700 | 0.01381500 | 0.01387000 | 0.01386900 | 0.01384600 | 0.01362600 | 0.01326700 | 0.01295100 | 0.01278000 | 0.01287400 | 0.01323700 | 0.01358300 |
| 0.03376200 | 0.03375200 | 0.03359000 | 0.03329200 | 0.03344900 | 0.03415500 | 0.03472400 | 0.03463300 | 0.03405900 | 0.03351200 | 0.03339400 | 0.03361900 | 0.03369900 | 0.03349000 |
| 0.03312200 | 0.03308100 | 0.03300300 | 0.03277400 | 0.03257700 | 0.03258100 | 0.03251100 | 0.03220900 | 0.03201200 | 0.03212400 | 0.03237700 | 0.03267000 | 0.03295600 | 0.03313500 |
| 0.02446100 | 0.02453400 | 0.02484800 | 0.02501800 | 0.02504700 | 0.02525100 | 0.02560100 | 0.02560600 | 0.02493300 | 0.02391900 | 0.02331300 | 0.02343800 | 0.02388800 | 0.02425000 |
| 0.03083100 | 0.03079800 | 0.03053800 | 0.03021500 | 0.03041300 | 0.03123200 | 0.03200600 | 0.03211500 | 0.03164200 | 0.03104800 | 0.03060600 | 0.03033300 | 0.03019700 | 0.03018200 |
| 0.03435100 | 0.03431200 | 0.03426300 | 0.03409200 | 0.03394000 | 0.03388700 | 0.03386300 | 0.03379900 | 0.03378000 | 0.03396500 | 0.03429200 | 0.03441100 | 0.03414200 | 0.03376100 |
| 0.02335300 | 0.02367000 | 0.02393300 | 0.02408800 | 0.02421600 | 0.02427100 | 0.02417000 | 0.02374900 | 0.02299500 | 0.02232800 | 0.02214100 | 0.02233500 | 0.02254100 | 0.02247200 |
| 0.02152500 | 0.02151700 | 0.02144400 | 0.02153500 | 0.02172400 | 0.02163500 | 0.02125100 | 0.02086100 | 0.02046200 | 0.01988800 | 0.01947000 | 0.01973400 | 0.02049400 | 0.02103500 |
| 0.03259300 | 0.03272000 | 0.03296700 | 0.03299300 | 0.03272900 | 0.03238000 | 0.03229100 | 0.03251700 | 0.03262000 | 0.03225800 | 0.03177100 | 0.03181800 | 0.03243000 | 0.03287400 |
| 0.03725400 | 0.03721200 | 0.03737600 | 0.03767600 | 0.03779700 | 0.03748300 | 0.03688700 | 0.03631900 | 0.03594900 | 0.03591100 | 0.03627800 | 0.03678100 | 0.03686300 | 0.03627900 |
| 0.02465800 | 0.02404400 | 0.02353200 | 0.02343500 | 0.02367600 | 0.02393000 | 0.02407400 | 0.02406100 | 0.02381500 | 0.02352600 | 0.02356200 | 0.02380100 | 0.02365600 | 0.02301000 |
| 0.02267800 | 0.02260000 | 0.02284100 | 0.02332900 | 0.02399400 | 0.02440300 | 0.02414300 | 0.02342300 | 0.02271400 | 0.02228800 | 0.02214200 | 0.02206800 | 0.02198800 | 0.02204700 |
| 0.01766400 | 0.01797700 | 0.01821800 | 0.01834100 | 0.01841500 | 0.01826600 | 0.01783500 | 0.01730400 | 0.01689300 | 0.01672400 | 0.01674900 | 0.01686600 | 0.01707600 | 0.01738500 |
| 0.01989600 | 0.01919700 | 0.01876600 | 0.01874700 | 0.01902700 | 0.01939700 | 0.01957000 | 0.01937300 | 0.01899300 | 0.01873600 | 0.01863500 | 0.01867300 | 0.01894100 | 0.01922900 |
| 0.02214500 | 0.02205000 | 0.02188100 | 0.02173300 | 0.02173900 | 0.02170200 | 0.02143300 | 0.02100400 | 0.02073000 | 0.02095200 | 0.02164500 | 0.02230100 | 0.02237900 | 0.02187300 |

| 9748       | 9750       | 9752       | 9754       | 9756       | 9757       | 9759       | 9761       | 9763       | 9765       | 9767       | 9769       | 9771       | 9773       |
|------------|------------|------------|------------|------------|------------|------------|------------|------------|------------|------------|------------|------------|------------|
| 0.02183100 | 0.02158800 | 0.02135700 | 0.02122900 | 0.02136200 | 0.02174200 | 0.02182200 | 0.02118400 | 0.02046600 | 0.02052500 | 0.02104900 | 0.02122000 | 0.02100000 | 0.02088800 |
| 0.01356900 | 0.01316600 | 0.01269800 | 0.01249900 | 0.01261000 | 0.01288100 | 0.01312700 | 0.01302200 | 0.01240500 | 0.01175000 | 0.01165900 | 0.01198400 | 0.01215400 | 0.01221800 |
| 0.03330500 | 0.03326700 | 0.03315900 | 0.03295500 | 0.03303300 | 0.03354600 | 0.03394300 | 0.03368000 | 0.03305800 | 0.03271400 | 0.03278500 | 0.03301200 | 0.03310100 | 0.03287400 |
| 0.03325800 | 0.03338000 | 0.03339200 | 0.03336800 | 0.03351700 | 0.03365700 | 0.03338600 | 0.03270700 | 0.03208400 | 0.03187400 | 0.03193300 | 0.03192700 | 0.03181000 | 0.03181100 |
| 0.02454500 | 0.02472400 | 0.02457300 | 0.02427600 | 0.02421600 | 0.02429900 | 0.02418900 | 0.02394500 | 0.02399000 | 0.02441300 | 0.02478900 | 0.02476600 | 0.02436900 | 0.02398000 |
| 0.03027000 | 0.03040400 | 0.03049700 | 0.03064400 | 0.03103400 | 0.03145600 | 0.03142000 | 0.03088100 | 0.03033200 | 0.03007000 | 0.02986800 | 0.02957400 | 0.02945300 | 0.02969700 |
| 0.03368800 | 0.03404700 | 0.03448200 | 0.03452700 | 0.03424800 | 0.03403600 | 0.03392000 | 0.03367300 | 0.03336300 | 0.03325100 | 0.03338400 | 0.03351600 | 0.03332900 | 0.03295300 |
| 0.02213600 | 0.02193100 | 0.02215900 | 0.02252600 | 0.02267600 | 0.02269300 | 0.02271800 | 0.02271600 | 0.02266300 | 0.02267300 | 0.02286600 | 0.02311000 | 0.02313300 | 0.02286800 |
| 0.02106100 | 0.02085300 | 0.02070300 | 0.02071300 | 0.02092700 | 0.02131600 | 0.02164800 | 0.02164200 | 0.02133000 | 0.02094600 | 0.02059000 | 0.02025500 | 0.01989200 | 0.01947100 |
| 0.03269600 | 0.03232800 | 0.03229700 | 0.03258000 | 0.03299000 | 0.03339200 | 0.03345900 | 0.03296900 | 0.03227900 | 0.03185000 | 0.03164200 | 0.03143200 | 0.03126600 | 0.03133100 |
| 0.03550600 | 0.03523900 | 0.03567500 | 0.03650300 | 0.03720800 | 0.03737600 | 0.03709100 | 0.03676600 | 0.03651800 | 0.03619300 | 0.03584700 | 0.03568400 | 0.03562200 | 0.03546900 |
| 0.02241900 | 0.02219200 | 0.02198300 | 0.02164400 | 0.02168000 | 0.02231100 | 0.02293300 | 0.02302200 | 0.02280200 | 0.02269900 | 0.02270800 | 0.02267100 | 0.02267400 | 0.02278200 |
| 0.02221200 | 0.02224000 | 0.02221800 | 0.02246700 | 0.02285800 | 0.02301000 | 0.02292800 | 0.02280200 | 0.02266400 | 0.02253500 | 0.02240600 | 0.02217700 | 0.02188100 | 0.02176000 |
| 0.01775100 | 0.01815900 | 0.01846900 | 0.01843100 | 0.01812500 | 0.01790300 | 0.01775900 | 0.01742200 | 0.01705900 | 0.01711000 | 0.01746400 | 0.01755800 | 0.01717900 | 0.01669100 |
| 0.01926900 | 0.01927300 | 0.01951500 | 0.01985200 | 0.02003600 | 0.02006000 | 0.01993000 | 0.01956100 | 0.01913700 | 0.01894900 | 0.01887900 | 0.01859800 | 0.01804800 | 0.01762400 |
| 0.02117800 | 0.02069100 | 0.02069300 | 0.02106800 | 0.02131800 | 0.02128500 | 0.02121800 | 0.02121100 | 0.02120100 | 0.02119000 | 0.02128800 | 0.02152300 | 0.02158400 | 0.02128000 |

| 9775       | 9777       | 9779       | 9781       | 9783       | 9784       | 9786       | 9788       | 9790       | 9792       | 9794       | 9796       | 9798       | 9800       |
|------------|------------|------------|------------|------------|------------|------------|------------|------------|------------|------------|------------|------------|------------|
| 0.02098400 | 0.02085900 | 0.02032900 | 0.01986700 | 0.01993900 | 0.02039500 | 0.02072300 | 0.02060900 | 0.02021400 | 0.01999000 | 0.02024800 | 0.02074900 | 0.02086400 | 0.02047200 |
| 0.01252800 | 0.01270400 | 0.01228200 | 0.01175900 | 0.01186300 | 0.01248200 | 0.01285900 | 0.01262900 | 0.01227800 | 0.01240300 | 0.01291500 | 0.01329600 | 0.01329500 | 0.01306000 |
| 0.03246800 | 0.03209900 | 0.03175700 | 0.03155800 | 0.03177500 | 0.03219100 | 0.03220600 | 0.03178900 | 0.03154100 | 0.03170500 | 0.03198900 | 0.03219100 | 0.03215900 | 0.03182400 |
| 0.03201400 | 0.03212200 | 0.03190800 | 0.03170100 | 0.03195500 | 0.03248700 | 0.03268500 | 0.03243500 | 0.03232500 | 0.03270900 | 0.03317800 | 0.03318000 | 0.03258400 | 0.03165500 |
| 0.02403300 | 0.02426300 | 0.02398500 | 0.02334100 | 0.02321100 | 0.02375500 | 0.02415500 | 0.02395100 | 0.02361000 | 0.02368800 | 0.02416400 | 0.02464600 | 0.02475800 | 0.02444700 |
| 0.03006700 | 0.03020700 | 0.02995700 | 0.02940800 | 0.02890500 | 0.02877500 | 0.02896100 | 0.02912900 | 0.02915900 | 0.02930300 | 0.02973600 | 0.03021000 | 0.03036200 | 0.03011800 |
| 0.03276600 | 0.03251300 | 0.03189200 | 0.03156000 | 0.03212600 | 0.03302900 | 0.03332500 | 0.03294900 | 0.03265300 | 0.03285400 | 0.03324400 | 0.03352900 | 0.03362400 | 0.03334100 |
| 0.02245500 | 0.02206600 | 0.02175200 | 0.02155100 | 0.02174300 | 0.02240000 | 0.02289200 | 0.02272400 | 0.02228800 | 0.02203300 | 0.02194600 | 0.02204800 | 0.02224000 | 0.02216200 |
| 0.01919800 | 0.01930200 | 0.01965400 | 0.02001700 | 0.02039300 | 0.02079200 | 0.02103000 | 0.02093800 | 0.02056700 | 0.02013500 | 0.01977800 | 0.01954700 | 0.01951700 | 0.01954000 |
| 0.03152300 | 0.03151900 | 0.03130900 | 0.03118900 | 0.03133000 | 0.03173800 | 0.03222400 | 0.03244600 | 0.03238000 | 0.03232100 | 0.03230100 | 0.03220300 | 0.03211800 | 0.03203500 |
| 0.03547300 | 0.03590800 | 0.03630400 | 0.03615000 | 0.03584000 | 0.03600200 | 0.03657600 | 0.03696800 | 0.03678500 | 0.03638300 | 0.03638100 | 0.03670600 | 0.03677700 | 0.03643200 |
| 0.02275000 | 0.02228500 | 0.02155700 | 0.02118000 | 0.02155300 | 0.02243300 | 0.02314700 | 0.02316600 | 0.02260800 | 0.02200900 | 0.02171500 | 0.02174400 | 0.02190600 | 0.02200400 |
| 0.02194600 | 0.02219900 | 0.02223900 | 0.02214000 | 0.02213100 | 0.02235300 | 0.02274400 | 0.02294000 | 0.02274300 | 0.02243600 | 0.02223700 | 0.02208500 | 0.02193700 | 0.02172800 |
| 0.01661300 | 0.01694300 | 0.01708500 | 0.01682000 | 0.01662600 | 0.01670800 | 0.01671000 | 0.01645200 | 0.01618900 | 0.01627900 | 0.01686300 | 0.01773100 | 0.01837500 | 0.01827900 |
| 0.01772700 | 0.01799600 | 0.01778500 | 0.01732500 | 0.01732700 | 0.01781600 | 0.01826800 | 0.01848100 | 0.01862200 | 0.01882400 | 0.01917100 | 0.01967400 | 0.01994000 | 0.01949400 |
| 0.02093200 | 0.02062800 | 0.02003200 | 0.01938700 | 0.01949100 | 0.02041400 | 0.02130900 | 0.02158400 | 0.02146800 | 0.02138000 | 0.02146000 | 0.02160900 | 0.02157500 | 0.02117900 |

| 9802       | 9804       | 9806       | 9808       | 9810       | 9811       | 9813       | 9815       | 9817       | 9819       | 9821       | 9823       | 9825       | 9827       |
|------------|------------|------------|------------|------------|------------|------------|------------|------------|------------|------------|------------|------------|------------|
| 0.02019400 | 0.02029700 | 0.02030400 | 0.01998000 | 0.01958500 | 0.01932200 | 0.01933700 | 0.01955200 | 0.01960900 | 0.01960900 | 0.01989300 | 0.02017700 | 0.02007900 | 0.01983700 |
| 0.01278900 | 0.01240500 | 0.01172100 | 0.01092400 | 0.01037300 | 0.01012300 | 0.01011500 | 0.01022700 | 0.01020400 | 0.01012900 | 0.01037100 | 0.01085800 | 0.01111900 | 0.01107700 |
| 0.03166800 | 0.03198800 | 0.03220100 | 0.03197800 | 0.03161200 | 0.03108400 | 0.03043900 | 0.03027300 | 0.03075800 | 0.03136100 | 0.03171000 | 0.03177800 | 0.03155500 | 0.03119100 |
| 0.03099400 | 0.03110400 | 0.03176700 | 0.03234900 | 0.03247500 | 0.03216300 | 0.03176300 | 0.03160100 | 0.03173300 | 0.03217900 | 0.03275000 | 0.03285800 | 0.03221100 | 0.03127800 |
| 0.02410400 | 0.02405000 | 0.02414500 | 0.02410500 | 0.02372100 | 0.02297200 | 0.02221800 | 0.02195900 | 0.02233000 | 0.02297100 | 0.02347500 | 0.02375400 | 0.02379300 | 0.02345500 |
| 0.02970700 | 0.02937100 | 0.02915300 | 0.02901500 | 0.02885800 | 0.02853800 | 0.02821300 | 0.02831600 | 0.02890500 | 0.02949000 | 0.02964500 | 0.02942700 | 0.02902700 | 0.02858700 |
| 0.03277000 | 0.03240500 | 0.03238000 | 0.03237100 | 0.03212700 | 0.03161600 | 0.03108900 | 0.03089600 | 0.03110300 | 0.03151600 | 0.03184600 | 0.03192700 | 0.03188300 | 0.03192300 |
| 0.02186400 | 0.02167400 | 0.02159700 | 0.02155000 | 0.02148200 | 0.02121600 | 0.02083200 | 0.02069000 | 0.02078000 | 0.02082000 | 0.02080100 | 0.02076200 | 0.02058600 | 0.02042000 |
| 0.01940300 | 0.01927000 | 0.01925000 | 0.01906400 | 0.01861900 | 0.01827600 | 0.01832500 | 0.01858900 | 0.01874500 | 0.01888400 | 0.01930200 | 0.01978700 | 0.01973200 | 0.01905300 |
| 0.03171000 | 0.03114700 | 0.03079200 | 0.03091300 | 0.03111500 | 0.03092600 | 0.03052100 | 0.03042100 | 0.03071000 | 0.03096200 | 0.03088600 | 0.03062100 | 0.03039900 | 0.03046000 |
| 0.03606700 | 0.03589000 | 0.03562400 | 0.03521900 | 0.03495600 | 0.03481700 | 0.03468600 | 0.03471700 | 0.03491500 | 0.03506300 | 0.03510600 | 0.03509800 | 0.03497100 | 0.03466700 |
| 0.02208200 | 0.02223200 | 0.02238700 | 0.02246400 | 0.02235300 | 0.02203600 | 0.02175400 | 0.02159600 | 0.02144000 | 0.02137100 | 0.02139700 | 0.02126600 | 0.02098700 | 0.02087400 |
| 0.02144000 | 0.02126700 | 0.02135500 | 0.02159700 | 0.02167600 | 0.02137700 | 0.02102100 | 0.02112300 | 0.02163600 | 0.02204200 | 0.02201600 | 0.02163700 | 0.02117100 | 0.02087700 |
| 0.01751600 | 0.01689000 | 0.01690300 | 0.01713800 | 0.01716900 | 0.01718400 | 0.01745300 | 0.01786800 | 0.01808600 | 0.01796300 | 0.01777000 | 0.01766500 | 0.01731000 | 0.01664500 |
| 0.01856800 | 0.01776300 | 0.01723200 | 0.01697700 | 0.01714900 | 0.01761500 | 0.01794900 | 0.01789900 | 0.01756900 | 0.01734400 | 0.01746100 | 0.01759300 | 0.01749100 | 0.01756200 |
| 0.02063500 | 0.02036600 | 0.02052100 | 0.02094300 | 0.02129600 | 0.02125900 | 0.02104400 | 0.02099200 | 0.02085100 | 0.02037300 | 0.01987400 | 0.01969000 | 0.01973500 | 0.01984500 |



| 9829       | 9831       | 9833       | 9835       | 9837       | 9838       | 9840       | 9842       | 9844       | 9846       | 9848       | 9850       | 9852       | 9854       |
|------------|------------|------------|------------|------------|------------|------------|------------|------------|------------|------------|------------|------------|------------|
| 0.01979300 | 0.01989100 | 0.01992400 | 0.01982600 | 0.01955900 | 0.01915700 | 0.01890400 | 0.01899200 | 0.01920300 | 0.01928600 | 0.01920300 | 0.01899900 | 0.01881800 | 0.01887700 |
| 0.01120700 | 0.01170800 | 0.01219200 | 0.01230300 | 0.01204000 | 0.01151800 | 0.01076500 | 0.00988500 | 0.00919800 | 0.00889400 | 0.00883500 | 0.00891500 | 0.00912800 | 0.00946800 |
| 0.03104900 | 0.03122400 | 0.03146500 | 0.03162300 | 0.03168000 | 0.03154400 | 0.03117500 | 0.03070100 | 0.03027000 | 0.02986600 | 0.02945900 | 0.02930000 | 0.02959700 | 0.03009300 |
| 0.03077300 | 0.03098700 | 0.03155400 | 0.03181600 | 0.03156700 | 0.03113000 | 0.03079500 | 0.03078500 | 0.03129700 | 0.03206500 | 0.03245500 | 0.03210300 | 0.03116600 | 0.03030700 |
| 0.02294800 | 0.02284600 | 0.02324100 | 0.02360400 | 0.02360400 | 0.02336700 | 0.02310300 | 0.02284100 | 0.02257300 | 0.02249600 | 0.02274200 | 0.02304000 | 0.02311900 | 0.02312700 |
| 0.02849300 | 0.02896300 | 0.02952500 | 0.02963900 | 0.02939300 | 0.02919200 | 0.02915600 | 0.02920100 | 0.02924300 | 0.02899700 | 0.02836000 | 0.02784000 | 0.02784000 | 0.02807400 |
| 0.03218900 | 0.03272500 | 0.03326600 | 0.03344800 | 0.03331600 | 0.03311500 | 0.03282900 | 0.03237600 | 0.03185600 | 0.03138200 | 0.03103300 | 0.03097700 | 0.03120700 | 0.03144500 |
| 0.02062300 | 0.02121200 | 0.02186900 | 0.02220300 | 0.02191100 | 0.02121100 | 0.02077000 | 0.02085900 | 0.02101900 | 0.02073100 | 0.02023300 | 0.02019200 | 0.02053500 | 0.02064600 |
| 0.01841800 | 0.01832600 | 0.01859000 | 0.01884300 | 0.01887600 | 0.01863300 | 0.01831300 | 0.01821900 | 0.01842700 | 0.01872500 | 0.01886500 | 0.01873400 | 0.01832200 | 0.01781900 |
| 0.03096400 | 0.03154000 | 0.03170200 | 0.03149600 | 0.03113600 | 0.03087300 | 0.03092100 | 0.03104900 | 0.03103100 | 0.03096100 | 0.03081200 | 0.03060100 | 0.03048400 | 0.03050600 |
| 0.03438300 | 0.03441800 | 0.03469600 | 0.03485400 | 0.03479200 | 0.03466300 | 0.03460400 | 0.03467300 | 0.03469600 | 0.03451300 | 0.03429900 | 0.03419300 | 0.03409800 | 0.03406900 |
| 0.02109600 | 0.02148800 | 0.02175400 | 0.02175500 | 0.02155200 | 0.02139100 | 0.02156400 | 0.02203900 | 0.02241000 | 0.02232000 | 0.02179000 | 0.02116900 | 0.02074300 | 0.02045100 |
| 0.02090400 | 0.02119800 | 0.02152700 | 0.02156800 | 0.02123400 | 0.02099900 | 0.02121000 | 0.02140400 | 0.02117300 | 0.02087400 | 0.02087300 | 0.02113000 | 0.02149400 | 0.02174300 |
| 0.01633600 | 0.01674400 | 0.01726300 | 0.01715600 | 0.01644400 | 0.01569300 | 0.01531100 | 0.01541500 | 0.01601800 | 0.01676200 | 0.01694600 | 0.01644000 | 0.01588000 | 0.01567000 |
| 0.01799100 | 0.01832100 | 0.01836700 | 0.01837000 | 0.01838600 | 0.01839800 | 0.01839800 | 0.01817400 | 0.01769400 | 0.01734100 | 0.01739300 | 0.01768000 | 0.01790200 | 0.01799800 |
| 0.02010900 | 0.02052400 | 0.02087500 | 0.02107600 | 0.02111400 | 0.02087400 | 0.02031900 | 0.01968100 | 0.01924400 | 0.01906700 | 0.01905000 | 0.01912000 | 0.01936300 | 0.01984600 |

| 9856       | 9858       | 9860       | 9862       | 9864       | 9865       | 9867       | 9869       | 9871       | 9873       | 9875       | 9877       | 9879       | 9881       |
|------------|------------|------------|------------|------------|------------|------------|------------|------------|------------|------------|------------|------------|------------|
| 0.01913300 | 0.01925000 | 0.01908400 | 0.01876800 | 0.01840300 | 0.01809300 | 0.01804600 | 0.01825500 | 0.01838400 | 0.01817300 | 0.01774300 | 0.01746700 | 0.01758200 | 0.01796300 |
| 0.00997000 | 0.01045800 | 0.01056500 | 0.01029100 | 0.01000900 | 0.00980900 | 0.00952300 | 0.00935900 | 0.00969200 | 0.01028700 | 0.01046500 | 0.01001700 | 0.00950000 | 0.00943000 |
| 0.03039600 | 0.03049400 | 0.03060800 | 0.03071300 | 0.03061800 | 0.03045600 | 0.03045700 | 0.03058900 | 0.03075500 | 0.03076200 | 0.03035900 | 0.02969800 | 0.02922000 | 0.02909700 |
| 0.03030200 | 0.03110600 | 0.03182300 | 0.03190400 | 0.03158900 | 0.03119700 | 0.03072300 | 0.03023000 | 0.03006200 | 0.03012900 | 0.02986700 | 0.02942400 | 0.02947800 | 0.02983200 |
| 0.02326900 | 0.02342300 | 0.02340800 | 0.02328900 | 0.02330000 | 0.02350400 | 0.02357400 | 0.02323300 | 0.02271000 | 0.02234500 | 0.02219300 | 0.02231300 | 0.02283000 | 0.02346300 |
| 0.02809700 | 0.02796300 | 0.02798600 | 0.02812600 | 0.02813300 | 0.02795200 | 0.02767700 | 0.02750200 | 0.02754300 | 0.02764100 | 0.02765900 | 0.02766900 | 0.02778100 | 0.02803500 |
| 0.03162700 | 0.03197100 | 0.03242200 | 0.03260200 | 0.03231300 | 0.03167000 | 0.03098300 | 0.03068900 | 0.03094700 | 0.03139800 | 0.03160600 | 0.03146400 | 0.03112300 | 0.03067500 |
| 0.02054900 | 0.02060700 | 0.02067700 | 0.02056900 | 0.02047200 | 0.02056300 | 0.02070000 | 0.02060500 | 0.02030900 | 0.02003900 | 0.01978000 | 0.01958000 | 0.01970800 | 0.02003500 |
| 0.01761300 | 0.01785900 | 0.01826500 | 0.01839800 | 0.01808900 | 0.01760200 | 0.01741000 | 0.01770300 | 0.01807900 | 0.01789600 | 0.01707200 | 0.01628500 | 0.01619700 | 0.01674400 |
| 0.03073100 | 0.03102200 | 0.03088500 | 0.03027800 | 0.02988000 | 0.03004300 | 0.03028900 | 0.03020000 | 0.02996200 | 0.02987300 | 0.02997400 | 0.03003600 | 0.02978600 | 0.02928000 |
| 0.03432800 | 0.03476100 | 0.03491800 | 0.03472200 | 0.03453000 | 0.03437400 | 0.03406600 | 0.03395900 | 0.03450100 | 0.03510300 | 0.03478300 | 0.03385800 | 0.03349300 | 0.03389000 |
| 0.02015600 | 0.02002000 | 0.02025900 | 0.02074600 | 0.02111900 | 0.02104700 | 0.02058900 | 0.02019400 | 0.02004900 | 0.02002800 | 0.02018600 | 0.02045900 | 0.02057700 | 0.02066500 |
| 0.02162400 | 0.02117300 | 0.02074600 | 0.02062600 | 0.02081900 | 0.02112400 | 0.02119700 | 0.02098400 | 0.02091000 | 0.02114300 | 0.02138300 | 0.02145700 | 0.02130300 | 0.02076000 |
| 0.01571900 | 0.01603900 | 0.01659100 | 0.01696000 | 0.01690000 | 0.01664900 | 0.01640200 | 0.01612100 | 0.01591100 | 0.01590800 | 0.01597500 | 0.01600800 | 0.01612300 | 0.01630300 |
| 0.01798200 | 0.01787500 | 0.01789900 | 0.01815800 | 0.01831900 | 0.01798400 | 0.01720000 | 0.01649900 | 0.01637000 | 0.01677200 | 0.01724400 | 0.01741500 | 0.01744300 | 0.01759500 |
| 0.02030500 | 0.02044100 | 0.02027200 | 0.01993800 | 0.01958300 | 0.01938800 | 0.01943800 | 0.01967200 | 0.01992900 | 0.01994000 | 0.01959800 | 0.01928000 | 0.01922600 | 0.01914100 |

| 9883       | 9885       | 9887       | 9889       | 9891       | 9892       | 9894       | 9896       | 9898       | 9900       | 9902       | 9904       | 9906       | 9908       |
|------------|------------|------------|------------|------------|------------|------------|------------|------------|------------|------------|------------|------------|------------|
| 0.01839500 | 0.01881000 | 0.01914400 | 0.01920600 | 0.01882200 | 0.01820500 | 0.01797000 | 0.01824600 | 0.01850900 | 0.01856600 | 0.01847800 | 0.01800300 | 0.01728300 | 0.01698800 |
| 0.00960000 | 0.00956600 | 0.00930700 | 0.00908500 | 0.00905100 | 0.00918100 | 0.00950700 | 0.00997700 | 0.01009900 | 0.00954500 | 0.00877400 | 0.00836000 | 0.00838500 | 0.00858300 |
| 0.02916800 | 0.02932100 | 0.02969100 | 0.03015100 | 0.03014100 | 0.02968000 | 0.02944200 | 0.02949000 | 0.02944500 | 0.02945100 | 0.02955700 | 0.02927000 | 0.02863200 | 0.02837600 |
| 0.02979100 | 0.02951500 | 0.02959600 | 0.02989500 | 0.02993100 | 0.02987500 | 0.03022800 | 0.03083700 | 0.03109000 | 0.03094800 | 0.03074600 | 0.03046500 | 0.03012700 | 0.02995800 |
| 0.02362900 | 0.02320600 | 0.02262200 | 0.02222900 | 0.02217300 | 0.02260200 | 0.02337200 | 0.02384100 | 0.02346500 | 0.02236500 | 0.02112700 | 0.02037500 | 0.02046400 | 0.02106500 |
| 0.02836700 | 0.02865800 | 0.02872400 | 0.02828900 | 0.02733100 | 0.02641300 | 0.02622800 | 0.02673500 | 0.02721900 | 0.02744200 | 0.02778200 | 0.02802500 | 0.02757000 | 0.02674300 |
| 0.03016200 | 0.02981300 | 0.02980100 | 0.02999000 | 0.03021300 | 0.03048900 | 0.03093800 | 0.03148900 | 0.03172500 | 0.03137600 | 0.03069700 | 0.03012600 | 0.02995000 | 0.03008400 |
| 0.02009100 | 0.01981900 | 0.01967800 | 0.01993400 | 0.02031200 | 0.02048600 | 0.02039400 | 0.02015000 | 0.01994100 | 0.01983300 | 0.01966400 | 0.01925300 | 0.01871000 | 0.01848000 |
| 0.01725500 | 0.01730100 | 0.01722700 | 0.01744500 | 0.01772700 | 0.01772400 | 0.01753200 | 0.01749600 | 0.01778000 | 0.01803300 | 0.01772300 | 0.01689000 | 0.01621700 | 0.01621000 |
| 0.02895300 | 0.02916000 | 0.02967600 | 0.02992900 | 0.02971600 | 0.02941500 | 0.02958900 | 0.03027700 | 0.03081100 | 0.03072500 | 0.03030000 | 0.02994200 | 0.02977500 | 0.02989100 |
| 0.03425800 | 0.03412200 | 0.03374200 | 0.03351500 | 0.03354200 | 0.03383200 | 0.03443600 | 0.03513700 | 0.03539900 | 0.03489700 | 0.03390700 | 0.03302000 | 0.03269300 | 0.03299400 |
| 0.02086800 | 0.02082300 | 0.02043200 | 0.02008400 | 0.01986700 | 0.01968800 | 0.01968800 | 0.01988400 | 0.02005400 | 0.02011200 | 0.02004500 | 0.01973900 | 0.01929100 | 0.01909100 |
| 0.01991700 | 0.01925100 | 0.01913300 | 0.01932000 | 0.01932900 | 0.01920100 | 0.01927600 | 0.01949000 | 0.01955300 | 0.01948000 | 0.01933900 | 0.01897900 | 0.01854400 | 0.01856000 |
| 0.01633200 | 0.01626800 | 0.01644300 | 0.01676400 | 0.01673100 | 0.01627800 | 0.01595100 | 0.01606800 | 0.01619300 | 0.01587800 | 0.01541500 | 0.01525300 | 0.01535200 | 0.01543300 |
| 0.01753400 | 0.01697000 | 0.01642300 | 0.01635600 | 0.01658300 | 0.01690800 | 0.01726500 | 0.01742600 | 0.01715500 | 0.01641400 | 0.01562900 | 0.01555200 | 0.01627800 | 0.01698900 |
| 0.01893400 | 0.01876500 | 0.01857600 | 0.01846400 | 0.01862200 | 0.01892500 | 0.01937300 | 0.01997700 | 0.02016200 | 0.01958200 | 0.01871400 | 0.01801200 | 0.01757800 | 0.01747000 |

| 9910       | 9912       | 9914       | 9916       | 9918       | 9919       | 9921       | 9923       | 9925       | 9927       | 9929       | 9931       | 9933       | 9935       |
|------------|------------|------------|------------|------------|------------|------------|------------|------------|------------|------------|------------|------------|------------|
| 0.01729800 | 0.01771500 | 0.01777200 | 0.01741600 | 0.01691500 | 0.01665400 | 0.01670800 | 0.01669100 | 0.01645400 | 0.01632400 | 0.01639400 | 0.01650400 | 0.01674300 | 0.01702900 |
| 0.00859200 | 0.00828300 | 0.00796700 | 0.00807800 | 0.00859300 | 0.00900100 | 0.00896400 | 0.00861700 | 0.00820100 | 0.00788000 | 0.00778400 | 0.00795900 | 0.00836600 | 0.00884100 |
| 0.02865500 | 0.02882600 | 0.02858200 | 0.02836900 | 0.02856800 | 0.02899000 | 0.02921200 | 0.02903600 | 0.02866900 | 0.02837400 | 0.02805300 | 0.02758700 | 0.02732800 | 0.02760400 |
| 0.02984200 | 0.02943900 | 0.02861100 | 0.02769700 | 0.02735000 | 0.02776200 | 0.02856400 | 0.02942200 | 0.02997400 | 0.02975600 | 0.02886400 | 0.02816600 | 0.02829600 | 0.02883900 |
| 0.02132300 | 0.02103300 | 0.02092200 | 0.02130500 | 0.02156800 | 0.02135300 | 0.02110000 | 0.02123600 | 0.02158300 | 0.02169300 | 0.02145900 | 0.02127100 | 0.02146800 | 0.02180700 |
| 0.02633300 | 0.02625100 | 0.02590700 | 0.02548800 | 0.02570900 | 0.02646300 | 0.02682600 | 0.02636000 | 0.02556000 | 0.02511800 | 0.02522600 | 0.02562500 | 0.02606300 | 0.02639100 |
| 0.03003900 | 0.02959100 | 0.02916700 | 0.02921400 | 0.02969600 | 0.03030100 | 0.03078900 | 0.03107400 | 0.03105600 | 0.03074300 | 0.03038000 | 0.03020300 | 0.03022700 | 0.03010700 |
| 0.01878300 | 0.01915900 | 0.01906900 | 0.01868800 | 0.01863700 | 0.01904200 | 0.01940400 | 0.01937200 | 0.01905400 | 0.01869000 | 0.01844400 | 0.01842600 | 0.01863000 | 0.01894100 |
| 0.01650200 | 0.01649700 | 0.01628300 | 0.01615700 | 0.01607000 | 0.01597000 | 0.01583200 | 0.01556900 | 0.01527500 | 0.01516900 | 0.01532800 | 0.01563300 | 0.01594100 | 0.01615500 |
| 0.03033600 | 0.03076100 | 0.03069200 | 0.03021800 | 0.02989000 | 0.02997900 | 0.03011600 | 0.02981200 | 0.02913600 | 0.02852400 | 0.02827600 | 0.02849400 | 0.02905300 | 0.02956400 |
| 0.03342900 | 0.03332500 | 0.03267200 | 0.03219500 | 0.03241100 | 0.03304800 | 0.03352500 | 0.03350400 | 0.03305800 | 0.03275800 | 0.03314900 | 0.03392500 | 0.03432300 | 0.03413200 |
| 0.01931000 | 0.01962100 | 0.01965800 | 0.01944700 | 0.01918200 | 0.01899900 | 0.01908100 | 0.01946400 | 0.01976400 | 0.01969700 | 0.01959100 | 0.01972200 | 0.01979600 | 0.01953400 |
| 0.01903800 | 0.01924900 | 0.01878000 | 0.01810300 | 0.01788300 | 0.01827200 | 0.01886200 | 0.01911900 | 0.01900000 | 0.01894700 | 0.01915700 | 0.01934600 | 0.01931200 | 0.01916500 |
| 0.01541200 | 0.01547600 | 0.01570200 | 0.01579700 | 0.01552100 | 0.01517500 | 0.01522400 | 0.01551200 | 0.01554800 | 0.01539900 | 0.01540600 | 0.01556500 | 0.01587200 | 0.01634300 |
| 0.01710100 | 0.01680100 | 0.01639900 | 0.01606900 | 0.01595600 | 0.01605000 | 0.01620200 | 0.01630700 | 0.01628100 | 0.01610900 | 0.01594500 | 0.01595300 | 0.01609900 | 0.01623900 |
| 0.01759100 | 0.01773700 | 0.01789600 | 0.01811200 | 0.01823300 | 0.01825000 | 0.01845800 | 0.01880600 | 0.01873800 | 0.01812600 | 0.01765100 | 0.01791200 | 0.01873500 | 0.01934900 |

| 9937       | 9939       | 9941       | 9943       | 9945       | 9946       | 9948       | 9950       | 9952       | 9954       | 9956       | 9958       | 9960       | 9962       |
|------------|------------|------------|------------|------------|------------|------------|------------|------------|------------|------------|------------|------------|------------|
| 0.01687000 | 0.01620800 | 0.01569700 | 0.01591600 | 0.01677200 | 0.01745000 | 0.01721800 | 0.01643400 | 0.01598300 | 0.01604000 | 0.01622300 | 0.01648100 | 0.01702300 | 0.01757700 |
| 0.00904600 | 0.00880300 | 0.00835600 | 0.00800300 | 0.00771800 | 0.00744700 | 0.00735400 | 0.00747300 | 0.00759000 | 0.00749100 | 0.00705900 | 0.00654500 | 0.00654100 | 0.00708400 |
| 0.02806100 | 0.02822700 | 0.02826100 | 0.02842900 | 0.02850100 | 0.02818700 | 0.02770100 | 0.02758500 | 0.02805800 | 0.02863700 | 0.02869900 | 0.02845800 | 0.02857300 | 0.02879800 |
| 0.02912500 | 0.02917100 | 0.02920600 | 0.02918200 | 0.02910500 | 0.02900800 | 0.02876300 | 0.02842500 | 0.02833200 | 0.02858600 | 0.02883600 | 0.02873800 | 0.02842000 | 0.02831000 |
| 0.02185300 | 0.02166900 | 0.02162800 | 0.02182600 | 0.02205000 | 0.02205000 | 0.02176500 | 0.02139100 | 0.02120200 | 0.02115200 | 0.02093500 | 0.02074400 | 0.02103700 | 0.02143900 |
| 0.02646400 | 0.02636200 | 0.02632600 | 0.02635600 | 0.02633300 | 0.02631900 | 0.02635500 | 0.02627400 | 0.02599200 | 0.02565200 | 0.02527400 | 0.02486300 | 0.02474900 | 0.02516000 |
| 0.02952700 | 0.02893600 | 0.02894600 | 0.02945000 | 0.03015800 | 0.03073200 | 0.03056100 | 0.02976800 | 0.02929100 | 0.02928800 | 0.02904400 | 0.02849200 | 0.02823300 | 0.02832900 |
| 0.01932600 | 0.01966800 | 0.01954600 | 0.01881200 | 0.01803200 | 0.01781800 | 0.01816600 | 0.01853900 | 0.01849600 | 0.01814700 | 0.01770300 | 0.01720300 | 0.01698100 | 0.01736400 |
| 0.01610200 | 0.01581700 | 0.01571500 | 0.01597200 | 0.01630800 | 0.01635200 | 0.01596800 | 0.01556400 | 0.01570600 | 0.01615900 | 0.01619400 | 0.01586800 | 0.01582900 | 0.01604500 |
| 0.02970100 | 0.02950800 | 0.02917400 | 0.02876300 | 0.02839800 | 0.02827500 | 0.02845200 | 0.02892700 | 0.02952900 | 0.02976000 | 0.02930200 | 0.02849500 | 0.02793900 | 0.02781800 |
| 0.03364700 | 0.03308500 | 0.03257000 | 0.03224400 | 0.03215800 | 0.03221300 | 0.03229100 | 0.03240900 | 0.03269400 | 0.03315700 | 0.03353000 | 0.03353900 | 0.03325300 | 0.03292200 |
| 0.01898900 | 0.01842400 | 0.01821800 | 0.01837600 | 0.01847800 | 0.01842800 | 0.01850100 | 0.01862300 | 0.01847900 | 0.01819600 | 0.01803800 | 0.01789000 | 0.01773900 | 0.01782700 |
| 0.01897100 | 0.01873100 | 0.01858600 | 0.01863900 | 0.01876100 | 0.01873900 | 0.01853900 | 0.01834600 | 0.01838600 | 0.01873100 | 0.01916400 | 0.01925200 | 0.01885200 | 0.01834300 |
| 0.01649200 | 0.01598800 | 0.01544300 | 0.01547300 | 0.01577000 | 0.01584400 | 0.01569000 | 0.01537700 | 0.01493600 | 0.01460200 | 0.01449200 | 0.01443400 | 0.01438800 | 0.01452500 |
| 0.01642600 | 0.01679900 | 0.01713100 | 0.01708100 | 0.01677300 | 0.01650500 | 0.01631500 | 0.01618400 | 0.01617000 | 0.01611000 | 0.01578100 | 0.01548900 | 0.01578000 | 0.01655000 |
| 0.01903500 | 0.01799400 | 0.01718900 | 0.01704900 | 0.01718700 | 0.01732100 | 0.01756900 | 0.01806300 | 0.01871100 | 0.01920200 | 0.01922500 | 0.01881200 | 0.01816800 | 0.01735100 |

| 9964       | 9966       | 9968       | 9970       | 9972       | 9973       | 9975       | 9977       | 9979       | 9981       | 9983       | 9985       | 9987       | 9989       |
|------------|------------|------------|------------|------------|------------|------------|------------|------------|------------|------------|------------|------------|------------|
| 0.01758200 | 0.01701700 | 0.01639600 | 0.01612900 | 0.01619200 | 0.01636400 | 0.01655900 | 0.01669200 | 0.01659100 | 0.01632200 | 0.01609200 | 0.01590000 | 0.01582900 | 0.01625700 |
| 0.00744000 | 0.00725600 | 0.00699900 | 0.00706200 | 0.00730800 | 0.00750700 | 0.00762100 | 0.00760100 | 0.00728300 | 0.00682800 | 0.00669800 | 0.00686700 | 0.00690900 | 0.00682800 |
| 0.02839800 | 0.02764700 | 0.02737900 | 0.02759600 | 0.02766500 | 0.02731700 | 0.02694200 | 0.02702300 | 0.02743400 | 0.02765900 | 0.02765300 | 0.02776100 | 0.02790100 | 0.02773100 |
| 0.02851800 | 0.02877100 | 0.02897000 | 0.02906700 | 0.02870500 | 0.02790700 | 0.02742200 | 0.02771200 | 0.02838000 | 0.02889000 | 0.02912400 | 0.02910200 | 0.02885700 | 0.02862400 |
| 0.02128800 | 0.02087200 | 0.02083200 | 0.02112500 | 0.02133200 | 0.02136300 | 0.02138200 | 0.02136700 | 0.02115200 | 0.02090800 | 0.02098100 | 0.02119100 | 0.02113500 | 0.02098300 |
| 0.02575000 | 0.02592700 | 0.02557300 | 0.02524000 | 0.02535800 | 0.02569100 | 0.02591400 | 0.02602700 | 0.02605400 | 0.02596800 | 0.02589200 | 0.02580400 | 0.02541500 | 0.02502800 |
| 0.02844000 | 0.02861700 | 0.02901800 | 0.02956900 | 0.03007300 | 0.03029900 | 0.03032500 | 0.03041900 | 0.03040500 | 0.02998100 | 0.02938500 | 0.02897900 | 0.02881800 | 0.02897100 |
| 0.01805200 | 0.01861300 | 0.01904200 | 0.01934100 | 0.01922000 | 0.01872600 | 0.01855000 | 0.01891000 | 0.01895800 | 0.01824000 | 0.01742400 | 0.01709900 | 0.01725800 | 0.01767700 |
| 0.01598400 | 0.01563200 | 0.01540000 | 0.01551100 | 0.01582900 | 0.01609700 | 0.01628900 | 0.01643100 | 0.01626600 | 0.01566400 | 0.01499000 | 0.01469100 | 0.01500600 | 0.01586500 |
| 0.02792300 | 0.02818000 | 0.02870400 | 0.02927100 | 0.02940200 | 0.02910100 | 0.02877900 | 0.02854400 | 0.02838600 | 0.02850900 | 0.02883000 | 0.02896200 | 0.02890400 | 0.02895100 |
| 0.03275400 | 0.03282100 | 0.03291400 | 0.03292200 | 0.03303600 | 0.03317900 | 0.03307700 | 0.03277300 | 0.03227900 | 0.03156100 | 0.03114400 | 0.03151600 | 0.03231900 | 0.03300300 |
| 0.01815100 | 0.01852800 | 0.01889500 | 0.01924000 | 0.01948700 | 0.01965100 | 0.01980000 | 0.01966300 | 0.01896100 | 0.01812800 | 0.01783000 | 0.01813700 | 0.01876000 | 0.01935200 |
| 0.01812700 | 0.01825600 | 0.01847700 | 0.01843500 | 0.01814800 | 0.01818800 | 0.01887000 | 0.01959700 | 0.01966500 | 0.01925500 | 0.01889700 | 0.01868500 | 0.01865800 | 0.01905100 |
| 0.01486700 | 0.01521100 | 0.01540500 | 0.01542300 | 0.01516900 | 0.01470600 | 0.01449600 | 0.01471200 | 0.01495200 | 0.01499300 | 0.01490400 | 0.01459500 | 0.01406500 | 0.01378000 |
| 0.01713400 | 0.01721900 | 0.01715300 | 0.01713300 | 0.01671300 | 0.01586800 | 0.01538700 | 0.01543000 | 0.01535000 | 0.01512700 | 0.01528400 | 0.01575700 | 0.01605100 | 0.01600500 |
| 0.01675600 | 0.01708000 | 0.01812200 | 0.01900500 | 0.01942000 | 0.01939400 | 0.01883400 | 0.01792300 | 0.01714000 | 0.01695000 | 0.01738200 | 0.01787300 | 0.01801200 | 0.01796800 |

| 9991       | 9993       | 9995       | 9997       | 9999       | 10000     |
|------------|------------|------------|------------|------------|-----------|
| 0.01708500 | 0.01749300 | 0.01707900 | 0.01646000 | 0.01623400 | 0.0161500 |
| 0.00692100 | 0.00716500 | 0.00734100 | 0.00733700 | 0.00723800 | 0.0072750 |
| 0.02745300 | 0.02749200 | 0.02766800 | 0.02763900 | 0.02755600 | 0.0276050 |
| 0.02863600 | 0.02888700 | 0.02926200 | 0.02958300 | 0.02968000 | 0.0296210 |
| 0.02101800 | 0.02107800 | 0.02113800 | 0.02134500 | 0.02152300 | 0.0215630 |
| 0.02540600 | 0.02628800 | 0.02671700 | 0.02655300 | 0.02628900 | 0.0261940 |
| 0.02941700 | 0.02982600 | 0.02999600 | 0.03000200 | 0.02993000 | 0.0298570 |
| 0.01798400 | 0.01799000 | 0.01785700 | 0.01768800 | 0.01754500 | 0.0175630 |
| 0.01668700 | 0.01677600 | 0.01603500 | 0.01504400 | 0.01448800 | 0.0144850 |
| 0.02902400 | 0.02881700 | 0.02838300 | 0.02802300 | 0.02793700 | 0.0280860 |
| 0.03338700 | 0.03337100 | 0.03296500 | 0.03246900 | 0.03233900 | 0.0326530 |
| 0.01947100 | 0.01899900 | 0.01846800 | 0.01850300 | 0.01909000 | 0.0195920 |
| 0.01962200 | 0.01967900 | 0.01909500 | 0.01852000 | 0.01840500 | 0.0184230 |
| 0.01419100 | 0.01492300 | 0.01502800 | 0.01439100 | 0.01384900 | 0.0137320 |
| 0.01578400 | 0.01556600 | 0.01546300 | 0.01549700 | 0.01549900 | 0.0152550 |
| 0.01794200 | 0.01786900 | 0.01765600 | 0.01742900 | 0.01736000 | 0.0173350 |
