# Supplementary figures and images for: A NIR, 1H-NMR, LC-MS and chemometrics pilot study on the origin of carvedilol drug substances: a tool for discovering falsified active pharmaceutical ingredients
Source: Royal Society of Chemistry journal article supplement (doi:10.1039/d1ay02035h), 2022-01-01

Figure 1 s. Superimposed NIR spectra of the Carvedilol APIs

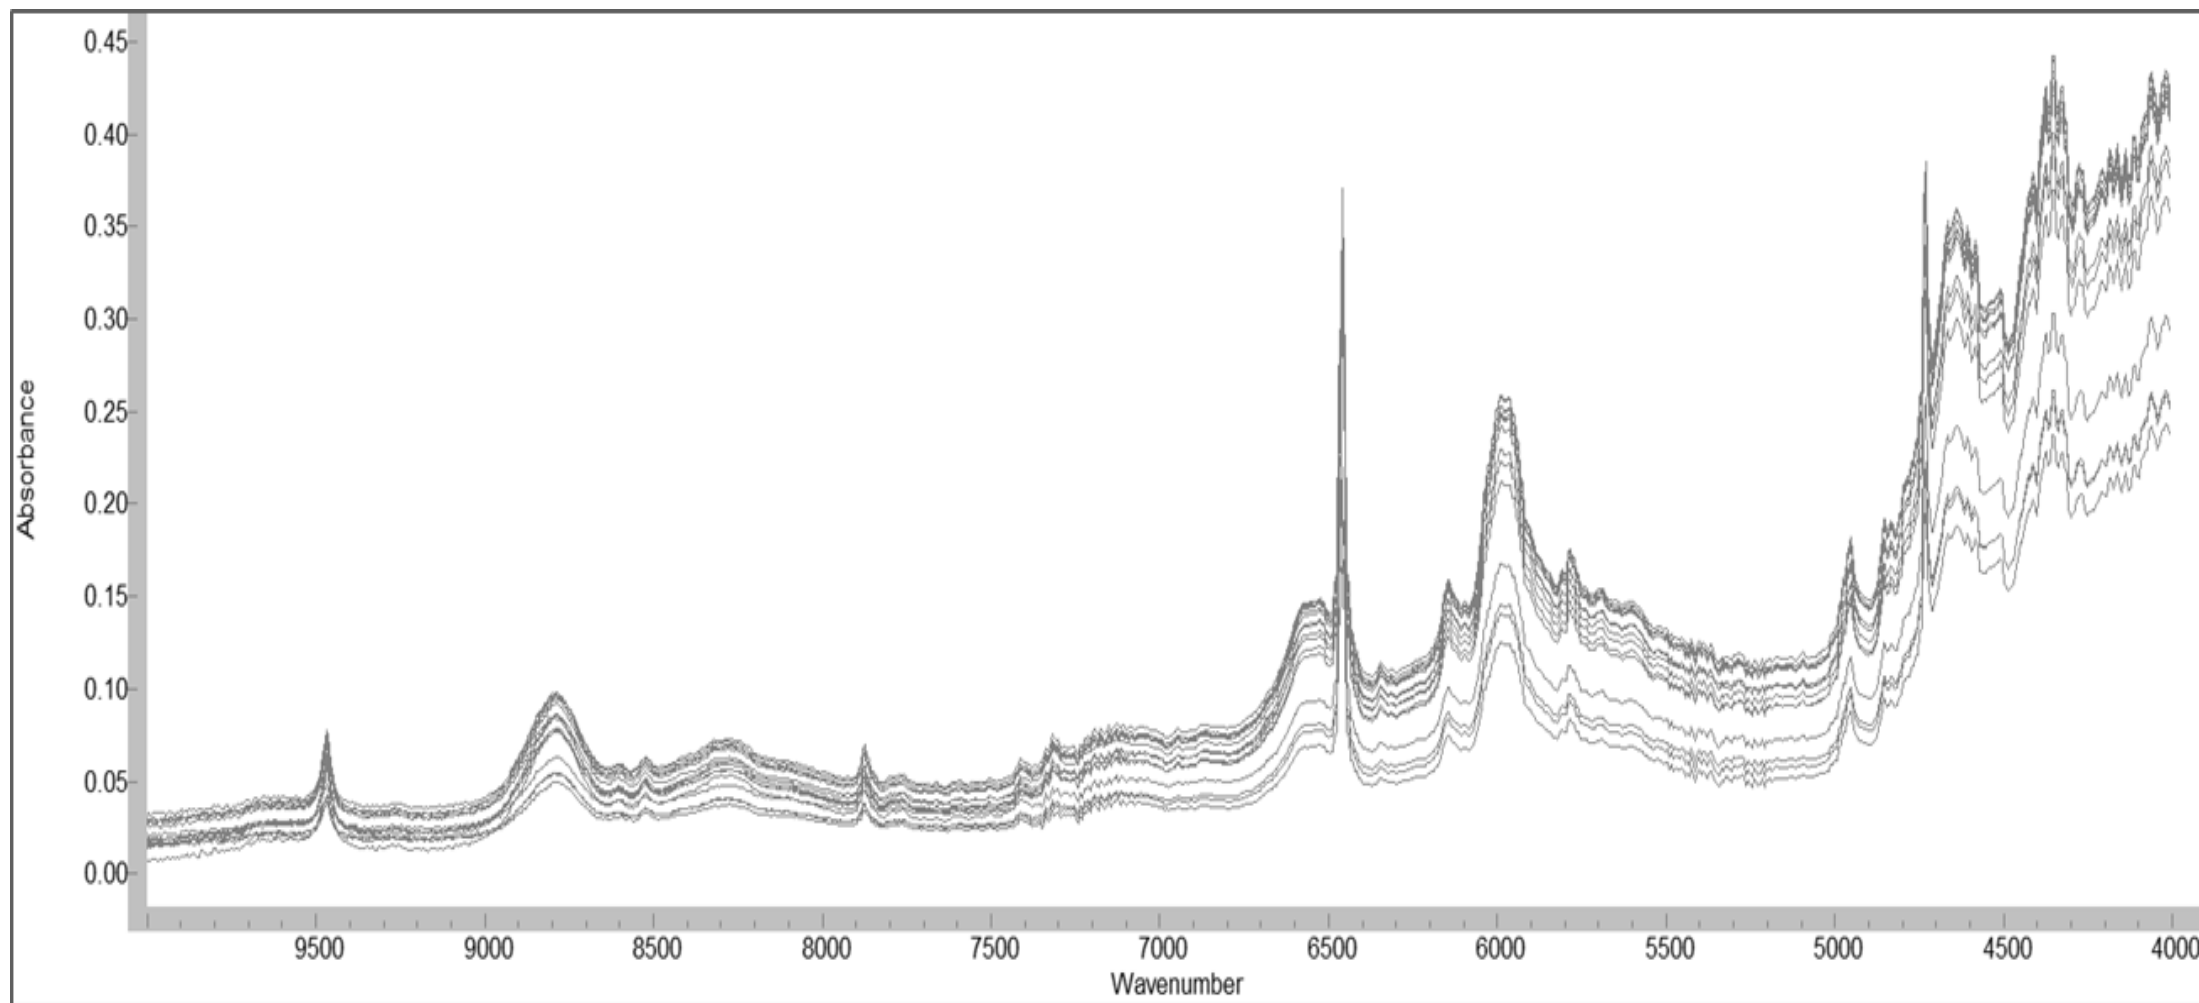

Supplement: d1ay02035h4.pdf [file d1ay02035h4.pdf]

Figure 2s: Superimposed  $^1\text{H}$ -NMR spectrum of the EU Carvedilol APIs

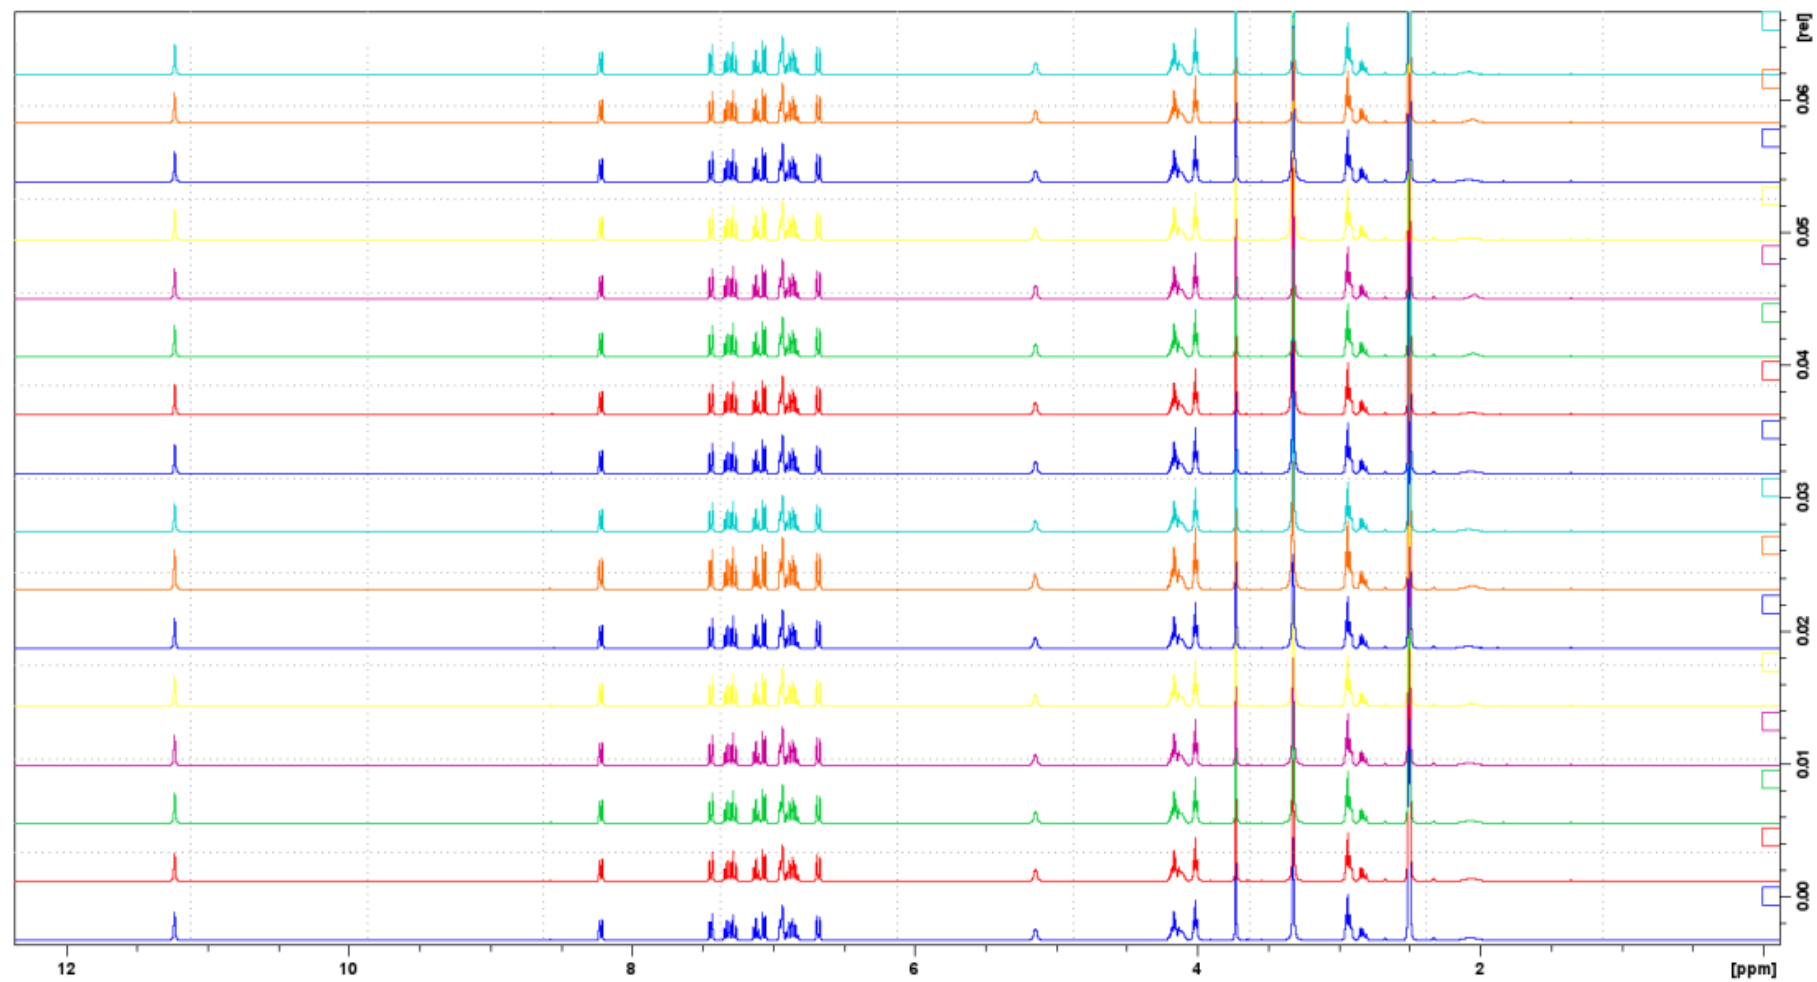

Supplement: d1ay02035h5.pdf [file d1ay02035h5.pdf]
